# Supplementary material for: Comprehensive fitness landscape of SARS-CoV-2 Mpro reveals insights into viral resistance mechanisms
Source: eLife. 2022 Jun 20;11:e77433. doi: 10.7554/eLife.77433 (PMC9323007; doi:10.7554/eLife.77433)
Supplement: Figure 2—source data 1. — For each dataset, the sequencing counts, unnormalized functional scores, and normalized functional scores (normalized to average stop = 0, average wild-type barcode = 1) are reported. For the growth screens, the selection coefficients are also reported. All figures in this paper use the data from replicate 1 of each screen. [file elife-77433-fig2-data1.xlsx]

## Sheet: FRET scores rep 1
Position	aa	Counts (uncut)	Counts (cut)	functional score (unnormalized)	functional score (normalized)
WT	WT	8239	129987	0.907	1
1	*	7190	364	0.0282955	-0.00411911
1	A	91	3057	0.950794	1.05004
1	C	192	4018	0.923295	1.01862
1	D	462	5777	0.877935	0.966786
1	E	925	8023	0.833025	0.915466
1	F	86	2272	0.938255	1.03572
1	G	151	3931	0.937398	1.03474
1	H	192	5362	0.941395	1.0393
1	I	225	4901	0.926084	1.02181
1	K	326	6143	0.915531	1.00975
1	L	87	1028	0.871737	0.959704
1	M	472	7357	0.899653	0.991604
1	N	163	3710	0.929036	1.02518
1	P	48	1957	0.959102	1.05954
1	Q	248	3875	0.899873	0.991855
1	R	79	1367	0.9087	1.00194
1	T	251	4181	0.905492	0.998277
1	V	78	2357	0.945596	1.0441
1	W	280	5781	0.922334	1.01752
1	Y	165	2956	0.91154	1.00519
2	*	8092	593	0.0404463	0.00976586
2	A	605	4329	0.804523	0.882896
2	C	442	5144	0.87003	0.957752
2	D	3698	452	0.0656863	0.0386082
2	E	2995	1853	0.262465	0.263472
2	F	237	4533	0.916676	1.01106
2	H	247	5423	0.926625	1.02243
2	I	202	5406	0.939	1.03657
2	K	436	3941	0.838687	0.921936
2	L	482	5705	0.871926	0.95992
2	M	389	4384	0.866352	0.95355
2	N	309	2874	0.842515	0.926311
2	P	449	366	0.319201	0.328305
2	Q	1493	4006	0.606816	0.656971
2	R	229	3827	0.905771	0.998595
2	S	736	3397	0.726386	0.793606
2	T	354	3789	0.860266	0.946596
2	V	433	5878	0.88647	0.976539
2	W	191	4889	0.936399	1.03359
2	Y	252	3020	0.873308	0.961498
3	*	3675	72	0.0111434	-0.0237191
3	A	7359	751	0.0554446	0.0269047
3	C	4678	940	0.103604	0.081938
3	D	7785	351	0.0252779	-0.00756745
3	E	8433	329	0.0219476	-0.011373
3	G	10213	981	0.0523566	0.023376
3	H	6777	405	0.0332316	0.00152142
3	I	164	3750	0.92934	1.02553
3	L	435	3746	0.832024	0.914322
3	M	170	5958	0.952738	1.05227
3	N	4763	425	0.0488183	0.0193327
3	P	6762	3131	0.210316	0.20388
3	Q	6484	527	0.0446617	0.0145829
3	R	7096	241	0.0191607	-0.0145576
3	S	5225	89	0.00970243	-0.0253658
3	T	2856	58	0.0115461	-0.023259
3	V	2702	4010	0.460518	0.489792
3	W	359	3971	0.864173	0.95106
3	Y	3687	827	0.114273	0.0941291
4	*	6058	250	0.0231864	-0.0099574
4	A	521	4628	0.836317	0.919228
4	C	240	4180	0.909238	1.00256
4	D	7808	298	0.0214811	-0.0119061
4	E	5888	555	0.0514288	0.0223157
4	F	4499	1487	0.159742	0.146087
4	G	7215	697	0.0526407	0.0237007
4	H	806	5901	0.808104	0.886988
4	I	84	2187	0.937404	1.03474
4	K	130	2327	0.911472	1.00511
4	L	678	7283	0.860697	0.947088
4	M	856	4976	0.769778	0.843191
4	N	1103	1557	0.448105	0.475607
4	P	213	4426	0.922792	1.01805
4	Q	101	2000	0.919289	1.01404
4	S	185	3310	0.911436	1.00507
4	T	387	5359	0.888455	0.978807
4	V	224	4823	0.925287	1.0209
4	W	5100	258	0.0282751	-0.00414247
4	Y	4125	1028	0.125373	0.106813
5	*	8148	497	0.0338954	0.00227996
5	A	319	5415	0.907096	1.00011
5	C	547	9564	0.909559	1.00292
5	D	4343	3691	0.328335	0.338743
5	E	2089	4691	0.563629	0.60762
5	F	304	2848	0.843472	0.927404
5	G	891	6912	0.816919	0.897062
5	H	362	4078	0.866303	0.953494
5	I	334	6353	0.916252	1.01057
5	L	287	3994	0.888945	0.979368
5	M	60	1481	0.9342	1.03108
5	N	239	4834	0.920847	1.01582
5	P	109	1615	0.894983	0.986268
5	Q	158	3054	0.917477	1.01197
5	R	462	7747	0.906059	0.998924
5	S	439	5901	0.885474	0.975401
5	T	26	703	0.939585	1.03724
5	V	444	6622	0.895601	0.986973
5	W	389	6275	0.902709	0.995096
5	Y	561	2257	0.698258	0.761463
6	*	4828	213	0.024748	-0.00817293
6	A	5086	942	0.0962766	0.0735644
6	C	1828	2048	0.39188	0.411358
6	D	7868	315	0.0225097	-0.0107307
6	E	4985	341	0.0378565	0.00680638
6	F	374	1049	0.617342	0.668998
6	G	9060	323	0.0200941	-0.013491
6	H	3357	264	0.0432763	0.0129997
6	I	426	6058	0.891062	0.981787
6	K	3243	167	0.0287676	-0.00357965
6	L	595	5969	0.852295	0.937487
6	N	4985	364	0.0403069	0.00960656
6	P	5168	327	0.0351165	0.00367535
6	Q	1194	3721	0.641902	0.697064
6	R	7032	468	0.0368692	0.00567816
6	S	4541	398	0.0479935	0.0183902
6	T	2973	2309	0.308783	0.316401
6	V	529	7329	0.888504	0.978863
6	W	4500	3769	0.325124	0.335073
6	Y	3047	4055	0.433579	0.459008
7	*	4637	133	0.01623	-0.0179066
7	C	341	2687	0.819245	0.899719
7	D	5793	313	0.0301412	-0.00201003
7	E	2831	270	0.0520045	0.0229737
7	F	5615	153	0.0154312	-0.0188195
7	G	9283	953	0.055757	0.0272617
7	H	7804	430	0.0307193	-0.00134938
7	I	6548	1562	0.120654	0.101421
7	K	4844	145	0.0169263	-0.017111
7	L	3167	178	0.0313159	-0.000667646
7	M	11034	405	0.0206757	-0.0128265
7	N	6078	437	0.039713	0.00892788
7	P	3683	1434	0.182976	0.172637
7	Q	3950	160	0.0227683	-0.0104351
7	R	6130	210	0.0193239	-0.0143711
7	S	242	3366	0.888893	0.979308
7	T	253	5250	0.922695	1.01793
7	V	239	3843	0.902427	0.994774
7	W	10570	617	0.0324847	0.000667961
7	Y	5136	244	0.0265991	-0.0060576
8	*	2437	228	0.0510654	0.0219005
8	A	367	6576	0.911554	1.0052
8	C	329	7100	0.925445	1.02108
8	D	6898	2795	0.18901	0.179533
8	E	3995	1059	0.1323	0.114729
8	G	7774	642	0.0453468	0.0153658
8	H	218	6526	0.945111	1.04355
8	I	5774	294	0.0284541	-0.0039379
8	K	1390	56	0.0226483	-0.0105723
8	L	527	5660	0.860677	0.947065
8	M	445	6055	0.886704	0.976807
8	N	212	3133	0.89474	0.98599
8	P	3701	202	0.0304382	-0.00167064
8	Q	96	1335	0.888873	0.979285
8	R	4540	1094	0.121731	0.102651
8	S	875	11326	0.88159	0.970963
8	T	184	1477	0.821974	0.902837
8	V	4646	3523	0.303698	0.31059
8	W	328	5949	0.912529	1.00632
8	Y	327	4530	0.888495	0.978853
9	*	5117	427	0.0457997	0.0158833
9	A	4292	503	0.0631522	0.0357123
9	C	2824	708	0.126031	0.107565
9	D	6612	337	0.0284813	-0.00390686
9	E	4730	205	0.0243226	-0.00865905
9	F	2219	53	0.013552	-0.0209668
9	G	4796	464	0.0527146	0.023785
9	H	5649	238	0.0236601	-0.00941605
9	I	6890	468	0.0376004	0.00651382
9	K	5594	521	0.0508467	0.0216506
9	L	3164	289	0.0499154	0.0205864
9	M	5490	459	0.0458831	0.0159786
9	N	8663	483	0.0310728	-0.000945413
9	Q	5017	253	0.0281883	-0.00424159
9	R	6178	701	0.0612665	0.0335576
9	S	3771	243	0.03574	0.00438788
9	T	2726	97	0.0200566	-0.0135339
9	V	4732	282	0.0331419	0.001419
9	W	9046	503	0.030992	-0.00103778
9	Y	8766	439	0.0279989	-0.00445808
10	*	5832	392	0.0372225	0.00608192
10	A	5136	230	0.0251113	-0.00775781
10	C	6535	716	0.0592839	0.031292
10	D	4575	243	0.0296453	-0.00257663
10	E	11214	632	0.0313988	-0.000572973
10	F	5098	554	0.0588287	0.0307718
10	G	6397	375	0.0326185	0.00082082
10	H	1893	52	0.0155545	-0.0186786
10	I	3927	236	0.0334121	0.00172768
10	K	8375	298	0.020056	-0.0135346
10	L	8782	583	0.03678	0.00557627
10	M	6732	451	0.0371042	0.00594671
10	N	7797	636	0.0448155	0.0147586
10	P	2069	198	0.0521729	0.023166
10	Q	4399	273	0.0344657	0.0029317
10	R	6421	347	0.030147	-0.00200342
10	T	127	2303	0.912514	1.0063
10	V	6463	472	0.0403133	0.00961385
10	W	6385	326	0.0285297	-0.00385151
10	Y	6853	576	0.0461157	0.0162443
11	*	6545	469	0.0395852	0.00878185
11	A	9346	937	0.0545225	0.025851
11	C	6390	591	0.0505112	0.0212672
11	D	13050	761	0.0324532	0.00063192
11	E	2190	33	0.00859276	-0.0266339
11	F	10817	379	0.019755	-0.0138785
11	H	7119	607	0.0467506	0.0169699
11	I	9859	623	0.035072	0.00362456
11	K	4943	255	0.0288178	-0.00352226
11	L	6023	688	0.0616524	0.0339985
11	M	5783	305	0.0294428	-0.00280812
11	N	9718	531	0.0304712	-0.00163294
11	P	6906	290	0.023584	-0.00950307
11	Q	11120	596	0.0299065	-0.00227818
11	R	6291	176	0.0158369	-0.0183558
11	S	4226	419	0.0539521	0.0251992
11	T	6357	492	0.0426195	0.0122492
11	V	9249	492	0.0296888	-0.00252701
11	W	4077	469	0.0620608	0.0344652
11	Y	4848	504	0.056423	0.0280228
12	*	6229	356	0.031827	-8.36245e-05
12	A	795	3068	0.689414	0.751358
12	C	4790	4080	0.328828	0.339306
12	D	4591	248	0.0301347	-0.00201745
12	E	6484	553	0.0467621	0.0169831
12	F	4864	532	0.0591878	0.0311821
12	G	5696	311	0.0304489	-0.00165836
12	H	1799	1527	0.328058	0.338426
12	I	3809	408	0.0580356	0.0298655
12	L	4447	3951	0.338202	0.350018
12	M	1321	2608	0.531742	0.571181
12	N	5717	797	0.0742339	0.0483756
12	P	3488	395	0.0611541	0.0334291
12	Q	407	3768	0.8419	0.925607
12	R	191	3767	0.91899	1.0137
12	S	3792	3960	0.375263	0.392368
12	T	4374	961	0.112195	0.0917545
12	V	3067	2308	0.302088	0.30875
12	W	5766	412	0.0394767	0.00865791
12	Y	4944	901	0.0948778	0.0719658
13	*	5867	310	0.0294954	-0.00274799
13	A	265	6864	0.937101	1.0344
13	C	271	6264	0.930046	1.02634
13	D	6609	402	0.0338039	0.00217541
13	E	11455	458	0.0224805	-0.010764
13	F	9050	580	0.0355524	0.00417348
13	G	5066	344	0.0375893	0.00650112
13	H	10054	481	0.0267811	-0.00584972
13	I	346	7859	0.9289	1.02503
13	K	5712	399	0.0386267	0.00768655
13	L	8055	578	0.0396377	0.00884182
13	M	6311	304	0.0269598	-0.00564543
13	N	6805	370	0.0303257	-0.00179921
13	P	2437	449	0.0958201	0.0730426
13	Q	6763	303	0.0251226	-0.0077449
13	R	4327	214	0.0276602	-0.00484506
13	S	3558	1665	0.212081	0.205896
13	T	701	6042	0.832148	0.914464
13	W	6010	341	0.0316041	-0.000338297
13	Y	8182	541	0.0366385	0.00541462
14	*	6020	701	0.0627736	0.0352797
14	A	6048	533	0.0482449	0.0186775
14	C	9235	340	0.0207373	-0.012756
14	D	7796	442	0.0315809	-0.00036482
14	F	5629	188	0.0188484	-0.0149146
14	G	7490	385	0.0287168	-0.00363773
14	H	10263	496	0.0270465	-0.00554644
14	I	4841	145	0.0169366	-0.0170992
14	K	11136	414	0.020936	-0.012529
14	L	8940	982	0.0594262	0.0314545
14	M	4525	136	0.0169937	-0.0170339
14	N	7185	582	0.0445174	0.014418
14	P	5685	548	0.0525322	0.0235766
14	Q	5062	216	0.0239559	-0.00907811
14	R	3755	309	0.0451934	0.0151904
14	S	7536	537	0.0393731	0.00853942
14	T	5125	411	0.0440935	0.0139335
14	V	12896	721	0.0311562	-0.000850114
14	W	10991	404	0.0207047	-0.0127933
14	Y	4758	161	0.0190915	-0.0146367
15	*	5146	237	0.0258068	-0.00696299
15	A	217	5326	0.933851	1.03068
15	C	297	5282	0.910949	1.00451
15	D	249	5580	0.928005	1.024
15	E	270	5221	0.917508	1.01201
15	F	261	4135	0.901114	0.993274
15	H	237	5456	0.929783	1.02603
15	I	189	4120	0.926137	1.02187
15	K	79	1686	0.924674	1.0202
15	L	128	5100	0.95819	1.0585
15	M	423	7413	0.909748	1.00314
15	N	423	5944	0.889899	0.980458
15	P	322	6756	0.923479	1.01883
15	Q	154	3947	0.936476	1.03368
15	R	371	4197	0.86679	0.95405
15	S	81	2546	0.947587	1.04638
15	T	364	5655	0.899356	0.991264
15	V	347	5596	0.902686	0.995069
15	W	409	7787	0.916326	1.01066
15	Y	327	4156	0.879668	0.968767
16	*	7509	615	0.0449896	0.0149576
16	A	395	4186	0.859067	0.945225
16	D	6185	466	0.0415368	0.0110119
16	E	9411	706	0.041365	0.0108157
16	F	5246	236	0.0252232	-0.00762993
16	G	382	7381	0.91745	1.01194
16	H	7983	677	0.0465103	0.0166953
16	I	5164	161	0.017617	-0.0163217
16	K	6081	197	0.018293	-0.0155492
16	L	3421	1569	0.208738	0.202076
16	M	6767	419	0.0343899	0.00284504
16	N	4244	1759	0.192505	0.183526
16	P	2012	89	0.024812	-0.00809983
16	Q	2146	1174	0.23935	0.237058
16	R	5483	341	0.0345369	0.00301299
16	S	348	3984	0.86816	0.955615
16	T	366	5094	0.888957	0.979381
16	V	379	6581	0.908989	1.00227
16	W	4595	237	0.0288122	-0.00352865
16	Y	2879	223	0.0426524	0.0122868
17	*	7321	569	0.0427917	0.0124459
17	A	889	6393	0.805308	0.883793
17	C	439	7775	0.910611	1.00413
17	D	7632	660	0.0473843	0.017694
17	E	7224	1217	0.0883399	0.0644948
17	F	3732	2456	0.274588	0.277325
17	G	7160	1221	0.0893257	0.0656214
17	H	4367	429	0.0534827	0.0246628
17	I	114	3613	0.947996	1.04685
17	K	5639	391	0.0383532	0.00737397
17	L	198	2848	0.892165	0.983047
17	N	7472	1150	0.0813267	0.0564807
17	P	2820	366	0.0694664	0.0429277
17	Q	6853	1358	0.102318	0.080468
17	R	8351	312	0.0210374	-0.0124131
17	S	2377	3005	0.421013	0.444648
17	T	103	3361	0.949416	1.04847
17	V	268	4193	0.899991	0.991991
17	W	11989	673	0.0312782	-0.00071071
17	Y	9326	1135	0.0654224	0.0383066
18	*	6540	118	0.0102714	-0.0247156
18	A	294	4318	0.894156	0.985322
18	C	404	2528	0.782571	0.857811
18	D	7946	163	0.0116615	-0.0231271
18	E	8666	529	0.0339204	0.00230855
18	F	2255	83	0.0207321	-0.0127619
18	G	1002	4962	0.740151	0.809336
18	H	4011	84	0.0119025	-0.0228518
18	I	278	3805	0.887294	0.977481
18	K	9044	498	0.0307	-0.00137149
18	L	290	4504	0.899328	0.991233
18	M	402	4460	0.864525	0.951462
18	N	4088	1401	0.164664	0.151712
18	P	3511	157	0.0250756	-0.00779862
18	Q	11800	1230	0.0565648	0.0281848
18	R	5312	484	0.0497982	0.0204525
18	S	222	2953	0.884407	0.974182
18	T	188	4843	0.936778	1.03403
18	W	7799	492	0.0350153	0.00355969
18	Y	9284	519	0.0311529	-0.000853928
19	*	8269	914	0.0597771	0.0318556
19	A	201	5375	0.938955	1.03652
19	C	299	4504	0.896527	0.988032
19	D	215	6571	0.946177	1.04477
19	E	62	3351	0.968836	1.07066
19	F	372	6246	0.90617	0.999051
19	G	218	4139	0.916112	1.01041
19	H	204	3088	0.896979	0.988549
19	I	96	2571	0.93904	1.03661
19	K	435	8009	0.913719	1.00768
19	L	162	5326	0.949775	1.04888
19	M	324	6377	0.918837	1.01353
19	N	391	7251	0.914286	1.00833
19	P	172	4476	0.937376	1.03471
19	R	196	3034	0.899028	0.990889
19	S	114	5107	0.962641	1.06358
19	T	392	3717	0.845058	0.929216
19	V	183	4373	0.93218	1.02877
19	W	223	4388	0.918818	1.0135
19	Y	437	7431	0.907243	1.00028
20	*	5282	154	0.0164934	-0.0176056
20	A	284	5702	0.920308	1.01521
20	C	331	6565	0.919408	1.01418
20	D	14142	557	0.0221527	-0.0111387
20	E	7949	358	0.0252508	-0.00759842
20	F	786	6476	0.825756	0.90716
20	G	5594	352	0.0349293	0.00346148
20	H	2801	135	0.0269746	-0.0056285
20	I	221	4809	0.926015	1.02173
20	K	3810	380	0.0542554	0.0255458
20	L	216	5052	0.93081	1.02721
20	M	33	2029	0.972501	1.07485
20	N	6403	414	0.0358566	0.00452112
20	P	3831	351	0.0500612	0.020753
20	Q	6767	391	0.0321657	0.000303386
20	R	8081	535	0.0366833	0.00546581
20	S	1941	3665	0.520631	0.558484
20	T	278	6512	0.930908	1.02732
20	W	4737	134	0.0160104	-0.0181575
20	Y	10200	821	0.0442485	0.0141107
21	*	8441	347	0.0230992	-0.010057
21	A	286	6371	0.927605	1.02355
21	C	227	4398	0.917655	1.01217
21	D	250	5512	0.92691	1.02275
21	E	219	6195	0.942099	1.04011
21	F	320	5668	0.910619	1.00413
21	G	279	6145	0.92684	1.02267
21	H	331	7181	0.925809	1.02149
21	I	200	5522	0.940762	1.03858
21	K	273	3763	0.887997	0.978284
21	L	284	5487	0.917443	1.01193
21	M	217	3783	0.909317	1.00265
21	N	1565	4909	0.643395	0.69877
21	P	2446	145	0.0329732	0.00122616
21	Q	294	2341	0.820788	0.901483
21	R	175	2937	0.906133	0.999008
21	S	211	3735	0.910568	1.00408
21	V	190	4011	0.923911	1.01932
21	W	282	4612	0.903911	0.996469
21	Y	292	5857	0.920238	1.01513
22	*	6208	275	0.0248465	-0.00806039
22	A	109	2393	0.92662	1.02242
22	D	153	3075	0.920383	1.01529
22	E	331	5899	0.911118	1.00471
22	F	152	4394	0.943271	1.04145
22	G	420	4669	0.864759	0.951729
22	H	425	5236	0.876335	0.964957
22	I	150	5561	0.955206	1.05509
22	K	319	5983	0.915168	1.00933
22	L	295	4944	0.906013	0.998872
22	M	226	4111	0.912762	1.00658
22	N	299	6745	0.928446	1.02451
22	P	5686	271	0.0266826	-0.00596224
22	Q	336	4306	0.880545	0.969768
22	R	342	6594	0.917287	1.01176
22	S	149	5563	0.955506	1.05543
22	T	86	1714	0.919767	1.01459
22	V	311	2819	0.839065	0.922368
22	W	104	3503	0.950918	1.05019
22	Y	185	4473	0.932918	1.02962
23	*	6992	394	0.0313944	-0.000577913
23	A	233	5269	0.928608	1.02469
23	C	109	1783	0.903928	0.996489
23	D	353	7096	0.920398	1.01531
23	E	154	3430	0.927594	1.02353
23	F	330	5856	0.91077	1.00431
23	H	135	5204	0.956845	1.05696
23	I	210	3230	0.898446	0.990224
23	K	592	7391	0.877767	0.966594
23	L	209	4800	0.929627	1.02586
23	M	280	6450	0.929824	1.02608
23	N	279	5975	0.924914	1.02047
23	P	271	4977	0.913521	1.00745
23	Q	209	6371	0.946044	1.04462
23	R	432	5475	0.879369	0.968424
23	S	171	4198	0.933866	1.0307
23	T	594	7701	0.881757	0.971153
23	V	267	3283	0.876122	0.964714
23	W	207	2647	0.880314	0.969505
23	Y	419	4418	0.858455	0.944525
24	*	6703	459	0.0378946	0.00684993
24	A	59	2308	0.957448	1.05765
24	C	265	5341	0.920589	1.01553
24	D	125	3872	0.946857	1.04555
24	E	108	3903	0.9541	1.05382
24	F	80	2613	0.949462	1.04852
24	G	89	4526	0.966943	1.0685
24	H	85	1383	0.903463	0.995957
24	I	37	1194	0.948879	1.04786
24	K	92	2900	0.947729	1.04654
24	L	75	2459	0.949644	1.04873
24	M	209	3368	0.90262	0.994995
24	N	185	739	0.696754	0.759745
24	P	174	3198	0.913581	1.00752
24	Q	242	4465	0.913886	1.00787
24	R	392	6344	0.902994	0.995422
24	S	276	3068	0.864751	0.95172
24	V	65	2885	0.962306	1.0632
24	W	88	2950	0.950695	1.04993
24	Y	258	4235	0.904229	0.996833
25	*	7397	442	0.0332278	0.00151712
25	A	459	6793	0.894876	0.986145
25	C	93	3932	0.960504	1.06114
25	D	1393	4364	0.643107	0.698441
25	E	815	8235	0.853198	0.938518
25	F	393	7898	0.920378	1.01529
25	G	379	10360	0.940202	1.03794
25	H	133	5845	0.961945	1.06279
25	I	389	10295	0.938357	1.03583
25	K	410	1690	0.703344	0.767275
25	L	466	9660	0.922621	1.01785
25	M	329	5042	0.898114	0.989845
25	N	431	5091	0.871699	0.95966
25	P	129	764	0.773065	0.846948
25	Q	408	7422	0.912766	1.00659
25	R	39	715	0.913383	1.00729
25	S	299	5008	0.905961	0.998813
25	V	539	9482	0.910061	1.0035
25	W	621	8871	0.8915	0.982287
25	Y	519	7977	0.89838	0.99015
26	*	9540	482	0.0282402	-0.00418227
26	A	119	2828	0.93183	1.02837
26	C	180	3699	0.921998	1.01714
26	D	460	6004	0.882456	0.971953
26	E	343	7687	0.928009	1.02401
26	F	403	5573	0.88832	0.978653
26	G	569	4213	0.809844	0.888976
26	H	215	4346	0.920804	1.01577
26	I	56	3587	0.973575	1.07608
26	K	264	6687	0.935771	1.03288
26	L	411	7941	0.917446	1.01194
26	M	38	1098	0.943246	1.04142
26	N	95	1127	0.872181	0.960211
26	P	3413	1782	0.230958	0.227467
26	Q	335	5211	0.899469	0.991394
26	R	82	590	0.805393	0.88389
26	S	213	3623	0.907267	1.0003
26	V	554	8062	0.89328	0.984322
26	W	707	7741	0.862972	0.949688
26	Y	223	5379	0.932769	1.02945
29	*	6439	492	0.0420996	0.0116551
29	A	480	8636	0.911884	1.00558
29	C	5394	389	0.0398289	0.00906031
29	D	10523	489	0.026033	-0.00670452
29	E	6765	353	0.029139	-0.00315523
29	F	11931	1439	0.0648732	0.037679
29	H	8456	653	0.042529	0.0121457
29	I	7779	558	0.0396244	0.00882661
29	K	6680	228	0.0192542	-0.0144508
29	L	257	46	0.0933424	0.0702113
29	M	1189	69	0.0323012	0.000458241
29	N	8325	775	0.0508247	0.0216255
29	P	6883	471	0.0378694	0.00682113
29	Q	9786	367	0.0211156	-0.0123238
29	R	4502	551	0.0657676	0.038701
29	S	3475	2889	0.323499	0.333216
29	T	7610	467	0.034094	0.00250694
29	V	11171	529	0.0265157	-0.00615292
29	Y	7791	633	0.0446463	0.0145653
30	*	9764	525	0.0299995	-0.0021719
30	A	544	7640	0.889844	0.980395
30	C	130	2941	0.928635	1.02472
30	D	15787	769	0.0272544	-0.0053088
30	E	7033	702	0.0542954	0.0255915
30	F	179	2734	0.897806	0.989493
30	G	2476	89	0.0202564	-0.0133056
30	H	5857	233	0.02237	-0.0108903
30	I	524	5684	0.861864	0.948422
30	K	5569	390	0.0387211	0.00779442
30	M	9	842	0.981756	1.08543
30	N	1531	4602	0.633559	0.68753
30	P	3114	3911	0.419416	0.442823
30	Q	1894	3930	0.544108	0.585312
30	R	10892	467	0.024068	-0.00895
30	S	237	5051	0.924577	1.02009
30	T	461	7283	0.900862	0.992986
30	V	148	3894	0.938018	1.03544
30	W	2601	58	0.0126638	-0.0219818
30	Y	8160	577	0.0390825	0.00820743
31	*	2678	54	0.0114653	-0.0233513
31	A	727	19	0.0148098	-0.0195295
31	C	3381	361	0.0578612	0.0296663
31	D	118	63	0.234943	0.232022
31	E	1708	101	0.0328941	0.00113582
31	F	130	1413	0.862104	0.948696
31	G	1058	0	0	-0.036453
31	H	151	1688	0.865409	0.952472
31	I	838	74	0.0483372	0.018783
31	K	1268	26	0.0116566	-0.0231327
31	L	865	134	0.0818145	0.0570381
31	M	2238	1412	0.26627	0.267819
31	N	1998	325	0.085557	0.0613148
31	P	2791	186	0.0369171	0.00573296
31	Q	896	79	0.0482665	0.0187021
31	R	1960	127	0.0359308	0.00460587
31	S	2687	103	0.0215729	-0.0118012
31	T	2284	31	0.00774639	-0.027601
31	V	2879	592	0.105765	0.0844071
31	Y	50	1129	0.928509	1.02458
32	*	1072	88	0.0450881	0.0150701
32	A	32	1015	0.948037	1.04689
32	C	86	2278	0.938408	1.03589
32	D	1569	262	0.0876314	0.0636852
32	E	1101	47	0.0239655	-0.0090671
32	F	60	521	0.833182	0.915645
32	G	5396	890	0.0866496	0.0625633
32	H	395	68	0.0900984	0.0665044
32	I	60	898	0.895927	0.987346
32	K	913	61	0.0370078	0.00583655
32	M	159	3163	0.919629	1.01443
32	N	1487	319	0.10984	0.089063
32	P	893	151	0.0886394	0.0648371
32	Q	385	86	0.113855	0.0936519
32	R	486	76	0.0825245	0.0578494
32	S	1918	520	0.134905	0.117706
32	V	0	210	1	1.10627
32	W	1968	196	0.0541813	0.0254612
32	Y	747	0	0	-0.036453
33	*	2325	229	0.0536156	0.0248147
33	A	108	841	0.817486	0.897709
33	C	121	1829	0.896848	0.988398
33	E	178	2678	0.896413	0.987901
33	F	31	1413	0.963259	1.06429
33	G	231	5587	0.932938	1.02964
33	H	94	1456	0.899085	0.990955
33	K	176	3176	0.912123	1.00585
33	L	64	1428	0.927714	1.02367
33	M	74	1222	0.904747	0.997425
33	N	69	1385	0.92029	1.01519
33	P	1024	16	0.00890728	-0.0262744
33	Q	123	2861	0.930454	1.0268
33	R	9	646	0.976351	1.07925
33	S	28	258	0.841269	0.924886
33	T	30	2224	0.977086	1.08009
33	V	42	2083	0.966132	1.06757
33	W	122	1178	0.847419	0.931914
33	Y	73	3210	0.961966	1.06281
34	*	2936	116	0.0222205	-0.0110612
34	A	128	1954	0.897757	0.989437
34	C	28	1982	0.976028	1.07888
34	E	86	2045	0.931868	1.02842
34	F	112	1546	0.888139	0.978446
34	G	43	1842	0.960998	1.0617
34	H	237	2537	0.86028	0.946612
34	I	251	4575	0.912923	1.00677
34	K	45	1989	0.962155	1.06303
34	L	157	3372	0.925115	1.0207
34	M	94	1655	0.910129	1.00357
34	N	93	996	0.860337	0.946676
34	P	1212	859	0.289603	0.294483
34	Q	56	2088	0.955449	1.05536
34	R	88	3962	0.962821	1.06379
34	S	37	1279	0.952114	1.05155
34	T	192	3278	0.90758	1.00066
34	V	280	3602	0.880944	0.970224
34	W	336	3194	0.845386	0.929591
34	Y	22	1297	0.971355	1.07354
35	*	3717	290	0.0429488	0.0126256
35	A	285	4652	0.903742	0.996276
35	C	95	3463	0.954478	1.05425
35	D	85	1644	0.917525	1.01203
35	F	261	1691	0.788432	0.864508
35	G	233	3739	0.90225	0.994572
35	H	228	2627	0.868892	0.956452
35	I	8	868	0.984229	1.08825
35	K	198	4759	0.932546	1.02919
35	L	87	2751	0.947884	1.04672
35	M	126	3205	0.936024	1.03317
35	N	65	1272	0.918407	1.01304
35	P	306	57	0.0967744	0.0741332
35	Q	148	1975	0.884735	0.974557
35	R	161	2633	0.903908	0.996466
35	S	259	5455	0.923749	1.01914
35	T	47	1737	0.955071	1.05493
35	W	44	2086	0.964626	1.06585
35	Y	171	1865	0.86251	0.94916
36	*	1003	180	0.0935661	0.070467
36	A	170	3601	0.92415	1.0196
36	C	284	6196	0.926193	1.02193
36	D	2439	355	0.0772521	0.0518246
36	E	3242	315	0.0529287	0.0240297
36	F	5337	318	0.0331365	0.00141273
36	G	5761	319	0.0308665	-0.0011812
36	H	8706	291	0.0188632	-0.0148976
36	I	123	2569	0.923157	1.01846
36	K	3048	23	0.00432158	-0.0315146
36	L	309	2799	0.838975	0.922265
36	M	123	916	0.810732	0.889992
36	N	1731	75	0.0243156	-0.00866708
36	P	2487	159	0.035469	0.00407813
36	Q	3861	167	0.0242748	-0.0087137
36	R	4306	119	0.0156471	-0.0185727
36	S	3672	485	0.0706072	0.0442314
36	T	220	3070	0.889215	0.979676
36	W	2227	23	0.00590536	-0.0297048
36	Y	8421	337	0.0225006	-0.0107411
37	*	879	49	0.0310679	-0.000951086
37	A	189	3024	0.90199	0.994274
37	C	17	593	0.952526	1.05202
37	D	225	3195	0.890921	0.981626
37	E	184	3098	0.906406	0.999321
37	F	21	1661	0.978492	1.0817
37	G	32	870	0.939896	1.03759
37	H	103	747	0.806633	0.885307
37	I	162	1289	0.820681	0.90136
37	K	80	1400	0.909632	1.00301
37	L	36	1610	0.96258	1.06351
37	M	75	1679	0.927936	1.02392
37	N	118	2362	0.920087	1.01495
37	P	1167	20	0.00976135	-0.0252985
37	Q	291	833	0.622143	0.674485
37	R	70	1361	0.917921	1.01248
37	S	165	1556	0.844339	0.928395
37	T	111	2406	0.925748	1.02142
37	V	87	813	0.843138	0.927023
37	W	47	1885	0.958452	1.0588
38	*	1773	88	0.0277562	-0.0047354
38	A	22	1776	0.978918	1.08218
38	D	761	0	0	-0.036453
38	E	2297	204	0.0486007	0.0190841
38	F	64	693	0.861653	0.948181
38	G	19	704	0.955182	1.05506
38	H	136	584	0.71181	0.77695
38	I	55	2689	0.965661	1.06703
38	K	2075	91	0.0246045	-0.00833689
38	L	64	1096	0.907835	1.00095
38	M	112	990	0.835642	0.918456
38	N	39	1153	0.94446	1.04281
38	Q	265	1001	0.684811	0.746097
38	R	928	13	0.0079932	-0.027319
38	T	10	251	0.935222	1.03225
38	V	73	2470	0.951129	1.05043
38	W	2671	75	0.0158943	-0.0182903
38	Y	475	0	0	-0.036453
39	*	2894	74	0.0144945	-0.0198898
39	A	38	586	0.898683	0.990496
39	C	160	1570	0.849489	0.93428
39	D	4276	376	0.048143	0.018561
39	E	1992	224	0.0607506	0.032968
39	F	2983	158	0.0295652	-0.0026682
39	G	1549	209	0.0720187	0.0458442
39	H	6322	346	0.0305191	-0.00157817
39	I	2727	368	0.0720291	0.0458562
39	K	1911	202	0.057315	0.029042
39	L	6931	468	0.0373863	0.00626916
39	M	4013	297	0.0408313	0.0102058
39	N	203	326	0.480169	0.512248
39	Q	2325	141	0.0337067	0.00206434
39	R	5631	404	0.0396319	0.00883517
39	S	1959	2220	0.394608	0.414475
39	T	314	1904	0.777172	0.851641
39	V	206	2584	0.878271	0.96717
39	W	2732	284	0.0564193	0.0280185
39	Y	3543	237	0.0370503	0.00588516
40	*	7279	168	0.0131015	-0.0214816
40	A	4431	226	0.028501	-0.00388431
40	C	12544	695	0.0308841	-0.00116105
40	D	7260	344	0.0265311	-0.00613538
40	E	5720	535	0.0510518	0.021885
40	F	5677	329	0.0322587	0.000409728
40	G	10458	630	0.0334896	0.00181622
40	H	7161	408	0.0317317	-0.000192531
40	I	5262	471	0.0489641	0.0194993
40	K	7636	499	0.036226	0.00494325
40	L	9000	900	0.0543905	0.0257001
40	M	5278	231	0.0245559	-0.00839245
40	N	6910	258	0.0210244	-0.0124279
40	P	3045	293	0.052444	0.0234759
40	Q	5182	309	0.0331609	0.00144065
40	S	7183	273	0.0213932	-0.0120065
40	T	4864	125	0.0145665	-0.0198076
40	V	10535	452	0.0240839	-0.00893178
40	W	8588	301	0.0197614	-0.0138712
40	Y	3913	196	0.0280041	-0.00445212
41	*	3500	189	0.0301246	-0.00202903
41	A	6456	561	0.0476024	0.0179432
41	C	6838	590	0.0472822	0.0175774
41	D	9624	283	0.0166325	-0.0174467
41	E	8095	627	0.0426512	0.0122855
41	F	6943	409	0.0327729	0.000997341
41	G	6122	203	0.0187158	-0.015066
41	I	8704	498	0.031861	-4.47848e-05
41	K	3682	226	0.034101	0.00251495
41	L	5967	408	0.0378409	0.00678864
41	M	6918	521	0.0415194	0.0109921
41	N	7840	503	0.0355897	0.00421614
41	P	7170	271	0.0212775	-0.0121387
41	Q	5190	225	0.0243293	-0.00865141
41	R	5628	334	0.0330085	0.00126653
41	S	6896	319	0.0259179	-0.00683606
41	T	4072	283	0.0384385	0.00747151
41	V	3746	240	0.0355417	0.00416122
41	W	9784	485	0.0277221	-0.00477433
41	Y	5578	254	0.0255233	-0.00728693
42	*	5992	181	0.017078	-0.0169376
42	A	326	5390	0.904853	0.997546
42	C	584	6718	0.868709	0.956243
42	D	10081	1064	0.0572338	0.0289493
42	E	3805	1020	0.133592	0.116205
42	F	2194	4001	0.511938	0.548551
42	G	259	6254	0.932836	1.02952
42	H	7127	434	0.0338409	0.00221777
42	I	128	3023	0.931433	1.02792
42	K	5026	321	0.0354344	0.00403865
42	L	118	5970	0.966778	1.06831
42	M	282	6057	0.925118	1.0207
42	N	2030	4677	0.56993	0.61482
42	P	9750	308	0.0178458	-0.0160602
42	Q	5803	847	0.0774517	0.0520527
42	R	6028	478	0.043621	0.0133936
42	S	179	4114	0.929675	1.02591
42	T	507	7677	0.897008	0.988582
42	W	7868	350	0.0249484	-0.00794396
42	Y	4065	570	0.0746343	0.0488332
43	*	7173	508	0.0391411	0.0082744
43	A	255	4032	0.900939	0.993073
43	C	292	4421	0.896999	0.988571
43	D	5750	1624	0.139751	0.123243
43	E	924	8683	0.843876	0.927866
43	F	439	7434	0.906892	0.999876
43	G	302	6342	0.923541	1.0189
43	H	356	569	0.478986	0.510895
43	K	1334	4020	0.634146	0.688201
43	L	755	10317	0.887132	0.977296
43	M	219	4868	0.92746	1.02338
43	N	354	7030	0.919501	1.01429
43	P	3246	400	0.0661884	0.0391818
43	Q	350	4767	0.886802	0.976919
43	R	1757	3569	0.538827	0.579278
43	S	236	4498	0.916407	1.01075
43	T	307	5175	0.906505	0.999434
43	V	255	6787	0.938684	1.03621
43	W	2241	5560	0.58798	0.635446
43	Y	257	4785	0.914598	1.00868
44	*	8169	365	0.0250562	-0.00782079
44	A	190	2859	0.896428	0.987918
44	D	2782	4765	0.496268	0.530644
44	E	6337	2979	0.212843	0.206767
44	F	1133	4249	0.683252	0.744316
44	G	226	4933	0.926226	1.02197
44	H	1621	4404	0.609786	0.660365
44	I	197	5625	0.942606	1.04069
44	K	6029	6309	0.375742	0.392916
44	L	494	5069	0.855116	0.940711
44	M	532	6811	0.880439	0.969647
44	N	167	1976	0.871891	0.959879
44	P	1566	6046	0.689507	0.751464
44	Q	1201	2594	0.554036	0.596657
44	R	1610	2150	0.434424	0.459974
44	S	180	3166	0.910047	1.00348
44	T	126	4182	0.950226	1.0494
44	V	165	3693	0.927922	1.02391
44	W	1536	3572	0.572214	0.617429
44	Y	2371	2917	0.414398	0.43709
45	*	9052	307	0.0191344	-0.0145877
45	A	606	7292	0.873757	0.962012
45	C	248	5844	0.931291	1.02776
45	D	314	4344	0.88836	0.978699
45	E	198	5604	0.942128	1.04014
45	F	282	3494	0.876948	0.965658
45	G	148	4224	0.942582	1.04066
45	H	249	5028	0.920727	1.01569
45	I	560	7642	0.886996	0.977141
45	K	136	3645	0.939084	1.03666
45	L	258	4716	0.913149	1.00703
45	M	67	3124	0.964054	1.0652
45	N	166	5508	0.950212	1.04938
45	P	310	9375	0.945637	1.04415
45	Q	281	7885	0.941657	1.0396
45	R	287	6639	0.930097	1.02639
45	S	179	3419	0.916572	1.01094
45	V	329	5740	0.909381	1.00272
45	W	264	8060	0.946123	1.04471
45	Y	330	4291	0.882064	0.971505
46	*	5772	376	0.0361158	0.00481729
46	C	168	3499	0.922957	1.01823
46	D	179	3160	0.910348	1.00382
46	E	84	4017	0.96492	1.06619
46	F	141	2421	0.908055	1.00121
46	G	100	2499	0.934955	1.03194
46	H	331	6490	0.918553	1.0132
46	I	134	1859	0.888637	0.979016
46	K	249	3727	0.895935	0.987355
46	L	127	4015	0.947874	1.04671
46	M	231	5137	0.92749	1.02341
46	N	244	3690	0.896892	0.988449
46	P	11	1864	0.989844	1.09467
46	Q	343	3816	0.86485	0.951833
46	R	321	3666	0.867882	0.955298
46	T	162	2632	0.903335	0.995812
46	V	215	4638	0.925418	1.02105
46	W	194	3306	0.907424	1.00048
46	Y	96	4043	0.960355	1.06097
47	*	3063	95	0.017527	-0.0164245
47	A	146	2555	0.909632	1.00301
47	C	269	3108	0.869207	0.956813
47	D	21	1208	0.970663	1.07275
47	F	452	5616	0.877249	0.966003
47	G	160	3064	0.91677	1.01116
47	H	169	3203	0.915976	1.01026
47	I	68	2054	0.945576	1.04408
47	K	355	6154	0.908851	1.00211
47	L	74	2255	0.946027	1.0446
47	M	215	4680	0.926038	1.02175
47	N	137	1805	0.883426	0.97306
47	P	287	6215	0.925682	1.02135
47	Q	249	4315	0.908823	1.00208
47	R	164	3492	0.924513	1.02001
47	S	342	4715	0.888016	0.978306
47	T	233	3836	0.904486	0.997126
47	V	299	3842	0.880823	0.970086
47	W	138	1532	0.864598	0.951546
47	Y	61	943	0.898907	0.990751
48	*	2254	88	0.0219632	-0.0113552
48	A	83	1473	0.910777	1.00432
48	C	32	1621	0.966818	1.06836
48	E	21	930	0.962225	1.06311
48	F	241	3011	0.877845	0.966683
48	G	66	1821	0.940723	1.03854
48	H	82	1369	0.905686	0.998498
48	I	100	2151	0.925219	1.02082
48	K	127	1048	0.825979	0.907415
48	L	96	2225	0.930222	1.02654
48	M	97	2589	0.938846	1.03639
48	N	158	3058	0.917577	1.01209
48	P	17	1436	0.979833	1.08323
48	Q	147	1565	0.859622	0.945859
48	R	16	1852	0.985202	1.08936
48	S	78	1860	0.932047	1.02862
48	T	126	1579	0.87817	0.967054
48	V	76	1935	0.93608	1.03323
48	W	8	803	0.982974	1.08682
48	Y	55	1709	0.947013	1.04572
49	*	6542	174	0.015068	-0.0192345
49	A	179	3849	0.925195	1.02079
49	C	303	5995	0.919227	1.01397
49	D	735	4828	0.790718	0.867121
49	E	291	4469	0.898306	0.990064
49	F	159	3652	0.929633	1.02586
49	G	453	2796	0.780228	0.855134
49	H	247	5783	0.930877	1.02728
49	I	433	7930	0.9133	1.0072
49	K	81	3236	0.958297	1.05862
49	L	166	2486	0.895985	0.987412
49	N	341	4474	0.882995	0.972568
49	P	434	1247	0.623022	0.675489
49	Q	323	4896	0.897105	0.988692
49	R	194	6028	0.947013	1.04572
49	S	366	4397	0.87358	0.961809
49	T	242	4249	0.909903	1.00332
49	V	248	7615	0.946414	1.04504
49	W	500	7645	0.897903	0.989605
49	Y	419	6241	0.895479	0.986834
50	*	7431	724	0.0530666	0.0241874
50	A	201	2521	0.878259	0.967157
50	C	333	3621	0.862155	0.948754
50	D	315	6998	0.927422	1.02334
50	E	283	4883	0.908463	1.00167
50	F	310	4730	0.897712	0.989385
50	G	329	4924	0.895927	0.987346
50	H	246	5194	0.923922	1.01934
50	I	468	6230	0.884485	0.974271
50	K	174	4630	0.93867	1.03619
50	M	226	3062	0.886274	0.976315
50	N	230	3890	0.906788	0.999757
50	P	2658	3601	0.437967	0.464022
50	Q	103	3223	0.947364	1.04612
50	R	194	5620	0.943384	1.04158
50	S	374	4807	0.880851	0.970119
50	T	348	8161	0.930981	1.0274
50	V	397	5249	0.883788	0.973474
50	W	240	3704	0.898756	0.990578
50	Y	355	5716	0.902547	0.994911
51	*	10848	645	0.0330687	0.00133526
51	A	134	1676	0.877962	0.966817
51	C	261	4672	0.911474	1.00511
51	D	330	6423	0.918001	1.01257
51	E	209	4923	0.931265	1.02773
51	F	555	6270	0.866633	0.95387
51	G	289	5760	0.919769	1.01459
51	H	61	3403	0.969778	1.07174
51	I	399	5253	0.883349	0.972973
51	K	286	6387	0.927773	1.02374
51	L	302	6284	0.92289	1.01816
51	M	317	4419	0.889113	0.979559
51	P	5825	4316	0.298828	0.305024
51	Q	432	5442	0.878726	0.96769
51	R	481	4986	0.856371	0.942144
51	S	319	6532	0.92174	1.01684
51	T	479	6572	0.887536	0.977757
51	V	285	6264	0.926697	1.02251
51	W	296	6867	0.930284	1.02661
51	Y	196	6604	0.950933	1.0502
52	*	6074	397	0.0362325	0.0049507
52	A	241	5950	0.934214	1.0311
52	C	235	3395	0.892585	0.983527
52	D	637	8588	0.885775	0.975745
52	E	263	6208	0.931399	1.02788
52	F	391	5959	0.897605	0.989264
52	G	460	7250	0.900651	0.992744
52	H	466	5976	0.880615	0.969848
52	I	438	6049	0.888189	0.978503
52	K	439	3537	0.822515	0.903456
52	L	387	5845	0.896772	0.988312
52	M	250	4083	0.903791	0.996332
52	N	667	9386	0.890038	0.980616
52	Q	283	6597	0.930595	1.02696
52	R	1303	3235	0.588145	0.635635
52	S	335	3093	0.841537	0.925193
52	T	255	6082	0.93206	1.02864
52	V	181	4245	0.930987	1.02741
52	W	620	8353	0.885705	0.975665
52	Y	341	4969	0.893408	0.984468
53	*	3736	173	0.0259438	-0.00680643
53	A	106	1369	0.881357	0.970696
53	C	342	4549	0.884402	0.974176
53	D	292	4727	0.90302	0.995451
53	E	240	2242	0.843094	0.926972
53	F	423	8255	0.918201	1.0128
53	G	502	6998	0.889114	0.979561
53	H	447	5048	0.866589	0.953821
53	I	289	4516	0.899881	0.991864
53	K	204	4035	0.919204	1.01395
53	L	351	5864	0.905744	0.998564
53	M	35	1344	0.956686	1.05678
53	P	149	3570	0.932347	1.02896
53	Q	127	3387	0.9388	1.03634
53	R	159	3066	0.917297	1.01177
53	S	296	6189	0.923233	1.01855
53	T	230	5389	0.930925	1.02734
53	V	146	4648	0.948217	1.0471
53	W	236	6857	0.943542	1.04176
53	Y	191	2378	0.87747	0.966254
54	*	7515	304	0.0227387	-0.010469
54	A	5846	1884	0.15638	0.142245
54	C	4607	5107	0.389356	0.408473
54	D	5939	1455	0.123511	0.104686
54	E	5628	3025	0.236151	0.233402
54	F	217	5035	0.930294	1.02662
54	G	4075	754	0.0961904	0.0734658
54	H	677	7075	0.857368	0.943283
54	I	2606	4594	0.50347	0.538874
54	K	3263	1821	0.242997	0.241225
54	L	3430	4358	0.422236	0.446045
54	M	303	5067	0.905827	0.998659
54	N	5464	2538	0.210841	0.20448
54	P	2484	3204	0.425918	0.450253
54	Q	6493	2500	0.181311	0.170735
54	R	6688	1606	0.121359	0.102226
54	S	1962	1044	0.234341	0.231333
54	T	5067	2306	0.207462	0.200619
54	V	3590	4109	0.396989	0.417195
54	W	568	10552	0.914424	1.00848
55	*	7387	469	0.0352321	0.00380746
55	A	581	6991	0.873755	0.962009
55	C	354	4609	0.882198	0.971658
55	D	474	9771	0.922221	1.01739
55	F	364	6314	0.908903	1.00217
55	G	355	4566	0.880925	0.970203
55	H	214	4415	0.92228	1.01746
55	I	408	6090	0.895676	0.98706
55	K	130	2525	0.917844	1.01239
55	L	305	6408	0.923574	1.01894
55	M	268	5004	0.914819	1.00893
55	N	319	4288	0.885475	0.975402
55	P	214	3786	0.910523	1.00402
55	Q	295	8689	0.944264	1.04258
55	R	281	5288	0.915428	1.00963
55	S	311	4691	0.896651	0.988173
55	T	251	5071	0.920765	1.01573
55	V	545	9284	0.907393	1.00045
55	W	218	4222	0.917625	1.01214
55	Y	324	5484	0.906852	0.99983
56	*	8002	584	0.0402871	0.00958397
56	A	260	6289	0.932944	1.02965
56	C	379	5646	0.895492	0.986849
56	E	197	5409	0.940451	1.03822
56	F	241	3112	0.881339	0.970675
56	G	533	4438	0.827267	0.908886
56	H	225	7529	0.95061	1.04983
56	I	352	5596	0.901422	0.993625
56	K	226	5591	0.934338	1.03124
56	L	367	7092	0.917458	1.01195
56	M	164	3255	0.919459	1.01424
56	N	308	4636	0.896456	0.98795
56	P	332	6991	0.923733	1.01912
56	Q	342	6211	0.912633	1.00644
56	R	209	6039	0.943246	1.04142
56	S	265	5613	0.924146	1.01959
56	T	157	2574	0.904124	0.996713
56	V	900	6395	0.803422	0.881638
56	W	94	3454	0.954823	1.05465
56	Y	352	6613	0.915298	1.00948
57	*	10054	633	0.0349483	0.00348319
57	A	510	10009	0.918622	1.01328
57	C	391	7491	0.916804	1.0112
57	D	505	8737	0.908687	1.00193
57	E	348	4047	0.869945	0.957656
57	F	424	7027	0.905057	0.99778
57	G	452	7516	0.905343	0.998106
57	H	613	3733	0.777913	0.852488
57	I	372	6758	0.912658	1.00647
57	K	325	4228	0.882114	0.971561
57	M	467	8659	0.914274	1.00831
57	N	358	4267	0.872704	0.960808
57	P	1245	1838	0.459212	0.4883
57	Q	224	6478	0.943292	1.04147
57	R	486	7211	0.895116	0.986419
57	S	171	3630	0.924301	1.01977
57	T	316	6138	0.917848	1.0124
57	V	276	4950	0.911629	1.00529
57	W	698	11932	0.907686	1.00078
57	Y	393	5956	0.897089	0.988674
58	*	7762	522	0.0372413	0.00610346
58	A	424	5835	0.887838	0.978102
58	C	427	6854	0.902274	0.994599
58	D	383	6251	0.903733	0.996266
58	E	197	3901	0.919289	1.01404
58	F	349	4424	0.879391	0.968449
58	G	699	9768	0.889354	0.979835
58	H	125	4088	0.949523	1.04859
58	I	301	3880	0.881156	0.970467
58	K	403	7536	0.914936	1.00907
58	M	359	7583	0.923951	1.01937
58	N	165	3859	0.930808	1.02721
58	P	1538	4164	0.608959	0.659419
58	Q	335	4780	0.891389	0.98216
58	R	328	4959	0.896867	0.98842
58	S	185	3581	0.917586	1.0121
58	T	365	5661	0.899203	0.99109
58	V	210	4658	0.927316	1.02322
58	W	601	10166	0.906798	0.999769
58	Y	170	5764	0.951225	1.05054
59	*	6827	179	0.0148571	-0.0194755
59	A	248	3013	0.874814	0.963219
59	C	590	12544	0.924409	1.01989
59	D	278	4728	0.907256	1.00029
59	E	746	9450	0.879318	0.968367
59	F	68	1434	0.923837	1.01924
59	G	486	9547	0.918693	1.01336
59	H	83	1891	0.929101	1.02526
59	K	270	4956	0.913479	1.0074
59	L	533	9932	0.914662	1.00876
59	M	497	6804	0.887317	0.977507
59	N	135	6046	0.962631	1.06357
59	P	162	3572	0.926914	1.02276
59	Q	165	2885	0.90956	1.00293
59	R	236	4791	0.921116	1.01613
59	S	185	4397	0.931838	1.02838
59	T	192	5511	0.942889	1.04101
59	V	582	9522	0.903944	0.996507
59	W	331	8040	0.933206	1.02995
59	Y	257	5818	0.92868	1.02477
60	*	5772	180	0.0176212	-0.0163168
60	A	671	6212	0.841897	0.925605
60	C	120	2000	0.90554	0.998331
60	D	335	6206	0.914204	1.00823
60	E	227	4041	0.911027	1.0046
60	F	465	7416	0.901704	0.993947
60	G	288	3628	0.878726	0.96769
60	H	240	5747	0.932311	1.02892
60	I	160	5105	0.948326	1.04722
60	K	189	2477	0.882881	0.972438
60	L	445	6518	0.893898	0.985028
60	M	405	8532	0.923765	1.01916
60	N	350	7107	0.921133	1.01615
60	P	457	9601	0.923571	1.01894
60	Q	217	5735	0.938277	1.03574
60	S	439	8578	0.918295	1.01291
60	T	240	3847	0.902151	0.994458
60	V	313	5998	0.916821	1.01122
60	W	418	7969	0.916428	1.01077
60	Y	124	3788	0.946153	1.04474
61	*	6841	270	0.0221976	-0.0110873
61	A	623	9768	0.900183	0.99221
61	C	491	6399	0.8823	0.971774
61	D	492	8079	0.904261	0.996869
61	E	194	3209	0.904892	0.99759
61	F	198	4534	0.929435	1.02564
61	G	496	7123	0.892011	0.982871
61	H	279	6478	0.930338	1.02667
61	I	313	6044	0.917402	1.01189
61	L	388	10687	0.940628	1.03843
61	M	469	6664	0.890983	0.981696
61	N	284	6874	0.932985	1.02969
61	P	476	9360	0.918768	1.01345
61	Q	441	6255	0.890809	0.981498
61	R	453	5819	0.88079	0.970049
61	S	365	6197	0.907112	1.00013
61	T	254	4705	0.914197	1.00822
61	V	425	5968	0.889832	0.980381
61	W	207	4137	0.919971	1.01482
61	Y	135	4279	0.948002	1.04685
62	*	7593	568	0.0412525	0.0106871
62	A	253	5707	0.928442	1.0245
62	C	361	7579	0.923523	1.01888
62	D	174	2847	0.90395	0.996515
62	E	263	4107	0.899821	0.991796
62	F	273	4558	0.90569	0.998503
62	G	271	5695	0.923591	1.01896
62	H	234	4495	0.917006	1.01143
62	I	259	4185	0.902857	0.995265
62	K	550	7840	0.891293	0.982051
62	L	97	4439	0.9634	1.06445
62	M	160	4102	0.936493	1.0337
62	N	311	4284	0.887932	0.97821
62	P	233	3615	0.899235	0.991126
62	Q	184	5868	0.948303	1.0472
62	R	207	2148	0.8565	0.942291
62	T	133	3779	0.94234	1.04038
62	V	486	5200	0.860224	0.946547
62	W	346	7376	0.924596	1.02011
62	Y	265	5550	0.923351	1.01868
63	*	6563	360	0.0305858	-0.00150191
63	A	449	7453	0.905192	0.997933
63	C	586	9008	0.898393	0.990164
63	D	91	2929	0.948753	1.04771
63	E	537	11114	0.922507	1.01772
63	F	314	3502	0.865138	0.952163
63	G	497	6699	0.885752	0.975719
63	H	183	4191	0.929442	1.02564
63	I	191	5508	0.94314	1.0413
63	K	303	7152	0.931398	1.02788
63	L	229	3886	0.907069	1.00008
63	M	420	10287	0.933722	1.03054
63	P	502	8216	0.903974	0.996542
63	Q	485	4676	0.847224	0.931692
63	R	566	6711	0.872122	0.960143
63	S	254	6126	0.932762	1.02944
63	T	286	6589	0.929832	1.02609
63	V	221	7795	0.953025	1.05259
63	W	422	7333	0.909049	1.00234
63	Y	282	5828	0.922404	1.0176
64	*	5665	301	0.0296554	-0.00256517
64	A	445	12424	0.941379	1.03929
64	C	430	6658	0.899052	0.990917
64	D	168	3785	0.928361	1.02441
64	E	268	4406	0.904364	0.996987
64	F	586	5094	0.833334	0.915819
64	G	477	6256	0.882956	0.972523
64	I	369	4839	0.882944	0.97251
64	K	461	5164	0.865648	0.952745
64	L	128	1183	0.841672	0.925347
64	M	227	5315	0.93088	1.02729
64	N	265	5447	0.922014	1.01716
64	P	241	4297	0.911155	1.00475
64	Q	271	5245	0.917576	1.01208
64	R	775	4809	0.781141	0.856176
64	S	362	6865	0.916022	1.01031
64	T	258	4693	0.91276	1.00658
64	V	419	6214	0.895072	0.986369
64	W	219	5388	0.933999	1.03085
64	Y	228	3242	0.891053	0.981777
65	*	4980	82	0.00938213	-0.0257318
65	A	359	9017	0.935263	1.0323
65	C	435	5043	0.869592	0.957252
65	D	146	5731	0.957588	1.05781
65	E	432	5054	0.87062	0.958427
65	F	174	4038	0.930306	1.02663
65	G	351	4897	0.889194	0.979652
65	H	205	3365	0.904229	0.996832
65	I	124	5242	0.960499	1.06113
65	K	303	6998	0.929994	1.02627
65	L	350	7096	0.921021	1.01602
65	M	160	3069	0.916894	1.01131
65	P	360	5210	0.892753	0.983719
65	Q	372	4179	0.865981	0.953125
65	R	174	4846	0.941243	1.03913
65	S	42	3536	0.979768	1.08315
65	T	768	5019	0.78987	0.866151
65	V	139	3385	0.933366	1.03013
65	W	464	5391	0.86984	0.957536
65	Y	196	2944	0.896261	0.987728
66	*	7715	624	0.044454	0.0143456
66	A	4123	1082	0.13115	0.113415
66	C	456	7675	0.906377	0.999287
66	D	7168	366	0.0285314	-0.00384958
66	E	8806	798	0.0495414	0.020159
66	G	6080	379	0.0346137	0.00310078
66	H	6608	1615	0.123251	0.104388
66	I	223	4804	0.925323	1.02094
66	K	10025	645	0.0356865	0.00432677
66	L	401	8350	0.922941	1.01822
66	M	360	5954	0.90488	0.997576
66	N	6062	474	0.0430395	0.0127292
66	P	3297	3275	0.363605	0.379047
66	Q	4036	384	0.0518862	0.0228384
66	R	2543	87	0.0192984	-0.0144003
66	S	4446	398	0.0489688	0.0195047
66	T	348	3082	0.835906	0.918758
66	V	267	6246	0.930822	1.02722
66	W	336	7085	0.923831	1.01923
66	Y	228	6550	0.942936	1.04106
67	*	5877	427	0.0401146	0.0093868
67	A	383	5195	0.886388	0.976445
67	C	305	7842	0.936665	1.0339
67	D	262	3908	0.895611	0.986985
67	E	296	6756	0.92922	1.02539
67	F	226	5425	0.932465	1.0291
67	G	272	5413	0.919657	1.01446
67	H	273	7000	0.936502	1.03371
67	I	122	3955	0.9491	1.04811
67	K	627	6898	0.863537	0.950333
67	M	282	6065	0.925209	1.02081
67	N	178	4768	0.939052	1.03663
67	P	432	1721	0.696181	0.759091
67	Q	483	7904	0.903963	0.996529
67	R	399	6313	0.900997	0.993139
67	S	482	7049	0.893751	0.984859
67	T	326	6059	0.91446	1.00852
67	V	374	6913	0.914029	1.00803
67	W	501	8756	0.909524	1.00288
67	Y	252	5153	0.921641	1.01673
68	*	5356	335	0.0347268	0.00323011
68	A	253	4584	0.912447	1.00622
68	C	265	4525	0.907592	1.00068
68	D	11341	521	0.0257437	-0.00703516
68	E	8144	302	0.020884	-0.0125884
68	F	4718	334	0.039126	0.00825715
68	G	9863	1472	0.0790574	0.0538875
68	H	9084	554	0.0338899	0.0022737
68	I	375	7308	0.918095	1.01268
68	K	8481	385	0.0254466	-0.0073746
68	L	178	6451	0.954225	1.05396
68	M	281	6708	0.932115	1.0287
68	N	11088	386	0.0196307	-0.0140206
68	P	542	7608	0.889794	0.980337
68	Q	6853	173	0.0143125	-0.0200978
68	R	9446	721	0.042057	0.0116064
68	S	2459	4224	0.496993	0.531473
68	T	305	5553	0.912833	1.00666
68	W	5224	511	0.0532668	0.024416
68	Y	13428	877	0.0362062	0.00492062
69	*	10349	423	0.02297	-0.0102047
69	A	246	5701	0.930216	1.02653
69	C	414	4177	0.853013	0.938306
69	D	411	6882	0.905938	0.998786
69	E	247	4124	0.905692	0.998505
69	F	443	5532	0.877791	0.966622
69	G	329	7371	0.927989	1.02398
69	H	186	2870	0.898737	0.990557
69	I	263	6538	0.934635	1.03158
69	K	62	2188	0.953049	1.05262
69	L	166	3957	0.932024	1.02859
69	M	182	5369	0.944346	1.04268
69	N	526	9130	0.908957	1.00224
69	P	1198	4866	0.700266	0.763758
69	R	449	8400	0.914972	1.00911
69	S	480	9382	0.918318	1.01293
69	T	311	5965	0.916889	1.0113
69	V	159	2847	0.911498	1.00514
69	W	528	8043	0.89756	0.989212
69	Y	169	4413	0.937576	1.03494
70	*	4362	98	0.0127578	-0.0218744
70	C	711	3365	0.731345	0.799273
70	D	300	3952	0.883411	0.973044
70	E	438	8407	0.916945	1.01136
70	F	193	4511	0.930767	1.02716
70	G	263	4879	0.914314	1.00836
70	H	257	4413	0.90806	1.00121
70	I	271	3879	0.891694	0.982508
70	K	248	4863	0.918559	1.01321
70	L	317	5500	0.908922	1.0022
70	M	255	5292	0.922702	1.01794
70	N	17	2354	0.9876	1.0921
70	P	300	6921	0.929921	1.02619
70	Q	572	10697	0.914942	1.00907
70	R	304	6307	0.92268	1.01792
70	S	298	4344	0.893443	0.984507
70	T	338	4411	0.882441	0.971936
70	V	468	9593	0.921815	1.01693
70	W	378	5477	0.892867	0.983849
70	Y	561	7215	0.880917	0.970193
71	*	4049	510	0.0675549	0.0407434
71	A	546	5400	0.850494	0.935428
71	C	485	6012	0.876998	0.965716
71	D	290	5939	0.92175	1.01685
71	E	188	2934	0.899766	0.991733
71	F	493	6859	0.88892	0.979338
71	H	250	5598	0.927952	1.02394
71	I	366	5005	0.887205	0.977379
71	K	298	7578	0.936007	1.03315
71	L	295	7296	0.934322	1.03122
71	M	209	4736	0.928744	1.02485
71	N	439	7514	0.907792	1.0009
71	P	314	7184	0.929377	1.02557
71	Q	398	5911	0.895206	0.986523
71	R	350	3987	0.867589	0.954963
71	S	541	8593	0.901342	0.993534
71	T	387	6297	0.903466	0.995962
71	V	254	5301	0.923102	1.0184
71	W	388	7847	0.920841	1.01582
71	Y	217	3679	0.906992	0.99999
72	*	8311	557	0.0371181	0.00596265
72	A	552	7083	0.880676	0.969918
72	C	427	4946	0.869494	0.95714
72	D	188	2688	0.891587	0.982387
72	E	228	5525	0.933058	1.02978
72	F	119	2061	0.908775	1.00203
72	G	190	5145	0.93967	1.03733
72	H	181	3873	0.924856	1.0204
72	I	283	4305	0.897434	0.989068
72	K	249	6012	0.93283	1.02952
72	L	674	8346	0.876884	0.965585
72	M	270	4867	0.912036	1.00575
72	P	252	5338	0.92415	1.0196
72	Q	98	3610	0.954931	1.05477
72	R	384	6559	0.907618	1.00071
72	S	193	6270	0.949203	1.04823
72	T	234	4639	0.919374	1.01414
72	V	344	6713	0.918197	1.0128
72	W	252	5824	0.930037	1.02632
72	Y	412	6806	0.904778	0.997461
73	*	4942	89	0.0102523	-0.0247374
73	A	288	7356	0.93627	1.03345
73	C	628	7268	0.869397	0.95703
73	D	539	7983	0.894947	0.986226
73	E	144	1985	0.888003	0.978291
73	F	360	6634	0.913789	1.00776
73	G	371	7156	0.917318	1.01179
73	H	198	2732	0.888099	0.9784
73	I	266	3675	0.888227	0.978547
73	K	335	4439	0.884013	0.973732
73	L	454	6788	0.895833	0.987239
73	M	151	3073	0.921295	1.01633
73	N	197	4007	0.921256	1.01629
73	P	460	7267	0.90086	0.992983
73	Q	316	4552	0.892307	0.983209
73	R	318	4380	0.887923	0.978199
73	S	331	5880	0.910856	1.00441
73	T	247	3325	0.885622	0.97557
73	W	205	3575	0.909344	1.00268
73	Y	376	4643	0.876584	0.965242
74	*	9231	564	0.0339501	0.00234248
74	A	94	2458	0.937658	1.03503
74	C	319	4958	0.899394	0.991308
74	D	262	3306	0.878904	0.967894
74	E	535	9388	0.909855	1.00326
74	F	375	7248	0.917473	1.01197
74	G	384	9982	0.937312	1.03464
74	H	236	4827	0.921658	1.01675
74	I	534	6341	0.872288	0.960333
74	K	343	4861	0.890729	0.981407
74	L	199	3947	0.919409	1.01418
74	M	645	7253	0.866095	0.953256
74	N	280	4288	0.898049	0.989771
74	P	119	1603	0.88569	0.975648
74	R	408	6843	0.906078	0.998946
74	S	254	7011	0.940746	1.03856
74	T	157	3245	0.922411	1.01761
74	V	551	6544	0.872307	0.960355
74	W	508	9528	0.915169	1.00933
74	Y	128	1879	0.894108	0.985268
75	*	4098	37	0.00516644	-0.0305492
75	A	341	5566	0.90374	0.996275
75	C	414	6830	0.904664	0.99733
75	D	4085	1883	0.209571	0.203029
75	E	596	12329	0.922472	1.01768
75	F	404	7404	0.913355	1.00726
75	G	363	5868	0.902895	0.995308
75	H	297	6228	0.923439	1.01879
75	I	348	5858	0.906388	0.9993
75	K	137	2715	0.919347	1.01411
75	M	110	4711	0.960989	1.06169
75	N	521	6390	0.875848	0.964401
75	P	412	4086	0.850845	0.935829
75	Q	228	4861	0.924603	1.02012
75	R	335	7215	0.925306	1.02092
75	S	441	8034	0.912882	1.00672
75	T	373	8534	0.929378	1.02557
75	V	537	8813	0.904212	0.996814
75	W	436	8391	0.917148	1.0116
75	Y	354	5731	0.903025	0.995457
76	*	8686	494	0.0316766	-0.000255485
76	A	270	5447	0.92066	1.01561
76	C	223	6175	0.940924	1.03877
76	D	322	8211	0.936173	1.03334
76	E	610	6375	0.857371	0.943287
76	F	204	3344	0.90411	0.996697
76	G	316	3930	0.877353	0.966121
76	H	48	1575	0.949681	1.04877
76	I	366	6729	0.913607	1.00755
76	K	199	3175	0.901739	0.993988
76	L	273	6190	0.928784	1.02489
76	M	129	3981	0.946668	1.04533
76	N	414	6447	0.899569	0.991508
76	P	311	5711	0.913513	1.00744
76	Q	127	3160	0.934691	1.03164
76	S	246	4126	0.906079	0.998947
76	T	809	5022	0.78121	0.856255
76	V	639	7647	0.873151	0.961319
76	W	461	8377	0.912679	1.00649
76	Y	304	5203	0.907787	1.0009
77	*	6690	545	0.0447604	0.0146956
77	A	395	7480	0.915911	1.01018
77	C	312	4446	0.891262	0.982016
77	D	298	4353	0.89364	0.984732
77	E	693	11371	0.904195	0.996795
77	F	607	7638	0.878607	0.967554
77	G	338	4076	0.873997	0.962286
77	H	378	5750	0.897431	0.989065
77	I	213	3022	0.890838	0.98153
77	K	433	5542	0.88041	0.969614
77	L	634	10169	0.902207	0.994523
77	M	268	8286	0.946762	1.04544
77	N	255	6670	0.937676	1.03505
77	P	416	4020	0.847522	0.932032
77	Q	335	7490	0.927851	1.02383
77	R	451	573	0.422227	0.446036
77	S	301	5988	0.919631	1.01443
77	T	420	5974	0.891084	0.981812
77	W	918	5871	0.78626	0.862026
77	Y	601	10164	0.906782	0.99975
78	*	6866	372	0.0302219	-0.00191774
78	A	126	2472	0.918598	1.01325
78	C	289	4482	0.899198	0.991084
78	D	499	4841	0.848028	0.93261
78	E	364	6559	0.912006	1.00572
78	F	189	5540	0.944009	1.04229
78	G	339	8722	0.936704	1.03394
78	H	278	4821	0.908882	1.00215
78	K	158	5710	0.954101	1.05382
78	L	320	5132	0.902197	0.994511
78	M	725	7041	0.848165	0.932766
78	N	220	4267	0.917737	1.01227
78	P	2815	3188	0.394455	0.4143
78	Q	268	4804	0.911586	1.00524
78	R	135	3683	0.940091	1.03781
78	S	404	7498	0.914348	1.0084
78	T	188	3178	0.906744	0.999707
78	V	358	5492	0.898207	0.989951
78	W	328	5483	0.905795	0.998622
78	Y	583	7284	0.877846	0.966685
79	*	7668	301	0.02208	-0.0112217
79	A	294	5401	0.913545	1.00748
79	C	439	5805	0.8838	0.973488
79	D	358	4727	0.88365	0.973317
79	E	272	2411	0.836024	0.918893
79	F	172	4147	0.932742	1.02942
79	H	697	5911	0.829873	0.911864
79	I	252	7623	0.945651	1.04417
79	K	230	6080	0.938291	1.03576
79	L	661	8725	0.883617	0.973279
79	M	455	7034	0.898909	0.990753
79	N	199	3580	0.911876	1.00557
79	P	6338	764	0.0648393	0.0376402
79	Q	327	6306	0.917302	1.01177
79	R	239	3886	0.903403	0.995889
79	S	124	3105	0.935077	1.03208
79	T	401	5704	0.891088	0.981817
79	V	357	7564	0.924167	1.01962
79	W	420	7021	0.905796	0.998624
79	Y	396	5653	0.891434	0.982212
80	*	6606	563	0.0467301	0.0169465
80	A	451	7126	0.900875	0.993
80	C	322	6477	0.920445	1.01536
80	D	488	10164	0.922958	1.01824
80	E	182	6108	0.950748	1.04999
80	F	233	4613	0.919275	1.01403
80	G	290	7366	0.935938	1.03307
80	I	304	5826	0.916827	1.01123
80	K	374	7724	0.922354	1.01755
80	L	516	8775	0.907249	1.00028
80	M	467	7578	0.903228	0.995689
80	N	181	4438	0.933789	1.03061
80	P	495	10135	0.921733	1.01684
80	Q	268	4034	0.896458	0.987952
80	R	405	7906	0.918222	1.01282
80	S	380	5085	0.885017	0.974879
80	T	185	2975	0.902436	0.994784
80	V	1208	5765	0.732978	0.801139
80	W	248	8536	0.951918	1.05133
80	Y	327	7722	0.931427	1.02791
81	*	6387	127	0.0113078	-0.0235313
81	A	436	7404	0.907129	1.00015
81	C	251	4709	0.91519	1.00936
81	D	286	4635	0.903117	0.995562
81	E	268	3749	0.889457	0.979952
81	F	259	5516	0.924528	1.02003
81	G	345	5790	0.906131	0.999007
81	H	400	5607	0.889658	0.980182
81	I	350	6097	0.909254	1.00258
81	K	319	3688	0.869278	0.956894
81	L	182	3716	0.921532	1.01661
81	M	432	8242	0.916485	1.01084
81	N	197	6452	0.949592	1.04867
81	P	247	4100	0.905192	0.997934
81	Q	256	8892	0.952333	1.0518
81	R	203	4822	0.931801	1.02834
81	T	292	4090	0.889583	0.980097
81	V	354	7614	0.925214	1.02081
81	W	271	7122	0.937951	1.03537
81	Y	378	4846	0.880583	0.969811
82	*	7079	354	0.0279593	-0.00450328
82	A	188	5868	0.947239	1.04598
82	C	325	5762	0.910696	1.00422
82	D	272	4819	0.910639	1.00416
82	E	561	9479	0.906706	0.999663
82	F	229	4210	0.913603	1.00754
82	G	447	8762	0.918532	1.01318
82	H	259	5620	0.925821	1.02151
82	I	296	6880	0.930407	1.02675
82	K	436	5264	0.874127	0.962434
82	L	341	6849	0.920336	1.01524
82	N	321	3387	0.858538	0.944621
82	P	258	5318	0.922216	1.01739
82	Q	340	6327	0.914556	1.00863
82	R	406	6937	0.907645	1.00074
82	S	125	7095	0.97028	1.07231
82	T	429	5764	0.885429	0.975349
82	V	184	5538	0.945391	1.04387
82	W	491	8192	0.90563	0.998434
82	Y	333	5305	0.901607	0.993836
83	*	7182	211	0.0166177	-0.0174636
83	A	250	3568	0.891412	0.982186
83	C	477	8838	0.914217	1.00825
83	D	97	2252	0.930332	1.02666
83	E	168	4232	0.935439	1.0325
83	F	284	4218	0.895209	0.986525
83	G	380	5363	0.890324	0.980943
83	H	68	3577	0.968007	1.06971
83	I	374	6165	0.904593	0.997249
83	K	86	3317	0.956869	1.05699
83	L	441	6715	0.897523	0.98917
83	M	169	3864	0.929334	1.02552
83	N	413	6218	0.896479	0.987977
83	P	218	4904	0.928259	1.02429
83	R	452	5949	0.883319	0.972938
83	S	172	5209	0.94571	1.04423
83	T	392	6067	0.899013	0.990872
83	V	483	7530	0.899671	0.991625
83	W	479	8114	0.90692	0.999908
83	Y	180	3992	0.927307	1.0232
84	*	8899	568	0.0354127	0.00401389
84	A	394	5217	0.883939	0.973647
84	C	297	4987	0.906175	0.999057
84	D	196	2917	0.895401	0.986745
84	E	140	4050	0.943309	1.04149
84	F	293	4958	0.90683	0.999805
84	G	385	5185	0.885667	0.975622
84	H	233	3165	0.886534	0.976612
84	I	418	5366	0.880724	0.969973
84	K	375	5568	0.895183	0.986496
84	L	111	3092	0.941254	1.03914
84	M	373	4399	0.871524	0.95946
84	P	844	3668	0.714266	0.779756
84	Q	118	2969	0.935369	1.03242
84	R	236	4958	0.92357	1.01893
84	S	231	4807	0.922896	1.01816
84	T	321	5748	0.911502	1.00514
84	V	359	6409	0.911257	1.00486
84	W	415	7919	0.916498	1.01085
84	Y	142	2931	0.922314	1.0175
85	*	7242	221	0.0172499	-0.0167411
85	A	127	2343	0.913879	1.00786
85	D	6827	3331	0.219143	0.213966
85	E	6651	751	0.0609868	0.0332379
85	F	605	2468	0.701171	0.764792
85	G	252	4685	0.914482	1.00855
85	H	424	2290	0.756488	0.828004
85	I	470	7215	0.898268	0.990021
85	K	322	5179	0.902451	0.994801
85	L	2489	3315	0.433772	0.459228
85	M	557	7315	0.883094	0.972681
85	N	319	6097	0.916622	1.01099
85	P	838	3817	0.723751	0.790596
85	Q	1113	4208	0.685006	0.74632
85	R	323	4552	0.890183	0.980782
85	S	410	5474	0.884786	0.974615
85	T	94	3597	0.956541	1.05661
85	V	442	7742	0.909706	1.00309
85	W	6481	168	0.014691	-0.0196653
85	Y	1225	3521	0.623105	0.675584
86	*	5977	529	0.0484416	0.0189023
86	A	252	2907	0.869028	0.956608
86	C	335	7571	0.928568	1.02465
86	D	411	5882	0.891679	0.982491
86	E	490	5935	0.87448	0.962837
86	F	83	2980	0.953814	1.05349
86	G	250	2069	0.826397	0.907892
86	H	357	7069	0.919286	1.01404
86	I	229	4303	0.915312	1.0095
86	K	146	4131	0.942112	1.04012
86	L	157	2880	0.913429	1.00735
86	M	1769	1019	0.24887	0.247936
86	N	136	2658	0.918311	1.01293
86	P	4982	503	0.0548857	0.0262661
86	Q	353	6067	0.908137	1.0013
86	R	570	8795	0.898735	0.990555
86	S	191	3468	0.912616	1.00642
86	T	440	5993	0.886805	0.976922
86	W	8512	511	0.0333777	0.00168846
86	Y	528	6802	0.881093	0.970395
87	*	6749	347	0.0287239	-0.00362957
87	A	442	4606	0.857019	0.942885
87	C	328	7197	0.926583	1.02238
87	D	5733	939	0.0860982	0.0619332
87	E	905	7458	0.825786	0.907194
87	F	235	4779	0.921242	1.01627
87	G	1115	7539	0.795464	0.872543
87	H	1448	4937	0.662291	0.720363
87	I	287	7367	0.936566	1.03379
87	K	4779	753	0.0830982	0.0585051
87	M	332	5924	0.911216	1.00482
87	N	594	5252	0.83568	0.9185
87	P	10255	784	0.0421213	0.0116799
87	Q	592	8787	0.895151	0.986459
87	R	6817	190	0.0157784	-0.0184226
87	S	565	8482	0.896211	0.987671
87	T	427	6158	0.892417	0.983335
87	V	341	6182	0.912493	1.00628
87	W	1080	2913	0.60806	0.658392
87	Y	419	7673	0.913294	1.00719
88	*	6357	274	0.0241921	-0.00880817
88	A	447	6896	0.89872	0.990538
88	C	341	5100	0.895861	0.98727
88	D	463	6898	0.895501	0.986859
88	E	251	8541	0.951391	1.05073
88	F	225	2678	0.872547	0.960629
88	G	562	10351	0.913748	1.00771
88	H	489	5239	0.860382	0.946728
88	I	299	5018	0.906131	0.999007
88	L	495	6535	0.883635	0.9733
88	M	256	4503	0.910052	1.00349
88	N	514	7893	0.898298	0.990055
88	P	233	5316	0.929195	1.02536
88	Q	296	7418	0.935127	1.03214
88	R	295	6077	0.922172	1.01734
88	S	277	6592	0.931918	1.02847
88	T	101	2789	0.94077	1.03859
88	V	244	5486	0.928225	1.02425
88	W	415	6646	0.90207	0.994365
88	Y	62	2739	0.962136	1.06301
89	*	6283	122	0.0110454	-0.0238312
89	A	373	6702	0.911777	1.00546
89	C	491	6518	0.8842	0.973946
89	D	7716	532	0.0381452	0.00713632
89	E	11170	787	0.0389475	0.00805313
89	F	142	3446	0.933148	1.02988
89	G	9021	492	0.0304163	-0.00169563
89	H	2801	453	0.0851072	0.0608008
89	I	180	1696	0.844226	0.928266
89	K	10909	409	0.0211098	-0.0123304
89	M	55	4641	0.979812	1.0832
89	N	6976	1326	0.0985567	0.0761699
89	P	6379	279	0.0245399	-0.00841078
89	Q	8371	574	0.0379442	0.00690667
89	R	6980	364	0.029122	-0.00317465
89	S	1835	2316	0.420613	0.444191
89	T	316	3511	0.864696	0.951658
89	V	234	5846	0.934938	1.03192
89	W	787	5335	0.795883	0.873023
89	Y	367	5702	0.899362	0.991271
90	*	9752	545	0.0311439	-0.000864204
90	A	431	6072	0.890151	0.980745
90	C	340	6088	0.911499	1.00514
90	D	429	5055	0.871425	0.959347
90	E	67	3404	0.966913	1.06846
90	F	260	5186	0.919826	1.01466
90	G	160	5889	0.954895	1.05473
90	H	491	6128	0.877732	0.966554
90	I	227	3911	0.908341	1.00153
90	L	281	4911	0.909523	1.00288
90	M	238	5029	0.923977	1.0194
90	N	66	3801	0.970697	1.07279
90	P	340	4871	0.89178	0.982607
90	Q	319	5289	0.905093	0.99782
90	R	239	8505	0.95342	1.05305
90	S	238	4914	0.922336	1.01752
90	T	4876	4993	0.37067	0.38712
90	V	376	7855	0.923173	1.01848
90	W	88	2615	0.944728	1.04311
90	Y	437	7151	0.90396	0.996525
91	*	5822	279	0.0268246	-0.0057999
91	A	194	3307	0.907449	1.00051
91	C	339	4582	0.886032	0.976039
91	D	8596	518	0.0335001	0.00182827
91	E	7695	264	0.0193517	-0.0143394
91	F	4158	2193	0.232755	0.229521
91	G	892	2639	0.629864	0.683308
91	H	5902	421	0.0394122	0.00858417
91	I	177	5185	0.943976	1.04225
91	K	9986	341	0.0192631	-0.0144406
91	L	198	3093	0.899851	0.99183
91	M	346	4634	0.885104	0.974979
91	N	5146	617	0.0645153	0.03727
91	P	8018	861	0.0581727	0.0300222
91	Q	5474	480	0.0480151	0.0184148
91	R	7711	285	0.0208166	-0.0126655
91	S	243	6483	0.938821	1.03636
91	T	234	5730	0.933708	1.03052
91	W	11313	972	0.0470923	0.0173604
91	Y	7293	341	0.0261899	-0.00652527
92	*	3596	138	0.0215967	-0.0117739
92	A	202	5711	0.942069	1.04007
92	C	185	3733	0.920675	1.01563
92	E	164	3800	0.930204	1.02652
92	F	393	6543	0.905448	0.998227
92	G	34	1085	0.948335	1.04723
92	H	249	4265	0.907852	1.00097
92	I	301	7064	0.931029	1.02746
92	K	242	3066	0.879334	0.968384
92	L	127	3353	0.938218	1.03567
92	M	331	5429	0.904161	0.996755
92	N	476	5155	0.861672	0.948202
92	P	334	5765	0.908492	1.0017
92	Q	293	4645	0.901172	0.99334
92	R	173	4553	0.938034	1.03546
92	S	116	4505	0.957152	1.05731
92	T	252	5936	0.931266	1.02773
92	V	234	4014	0.907976	1.00111
92	W	213	5132	0.932699	1.02937
92	Y	350	5871	0.906089	0.998959
93	*	8886	593	0.0369659	0.00578869
93	A	329	7261	0.926977	1.02283
93	C	265	4695	0.910639	1.00416
93	D	442	7369	0.905567	0.998362
93	E	404	3475	0.831862	0.914137
93	F	336	4297	0.880324	0.969516
93	G	337	4832	0.891859	0.982698
93	H	314	4929	0.900289	0.992331
93	I	255	4736	0.914404	1.00846
93	K	60	1520	0.93578	1.03289
93	L	289	3984	0.888009	0.978297
93	M	294	5685	0.917507	1.01201
93	N	112	3275	0.943881	1.04214
93	P	250	7093	0.942261	1.04029
93	Q	343	7827	0.929205	1.02537
93	R	309	4259	0.887992	0.978278
93	S	151	4599	0.946	1.04457
93	V	396	6074	0.898193	0.989935
93	W	434	3975	0.840463	0.923966
93	Y	638	8600	0.885758	0.975725
94	*	6355	325	0.0285751	-0.00379961
94	C	62	3599	0.970921	1.07304
94	D	199	5422	0.940018	1.03773
94	E	310	6134	0.919233	1.01398
94	F	296	5078	0.907983	1.00112
94	G	438	8505	0.917823	1.01237
94	H	287	4449	0.899157	0.991037
94	I	367	4445	0.874475	0.962832
94	K	440	5454	0.876995	0.965712
94	L	279	5091	0.913011	1.00687
94	M	536	9008	0.90625	0.999142
94	N	444	5369	0.874299	0.962631
94	P	538	6803	0.879129	0.96815
94	Q	462	5022	0.862114	0.948707
94	R	114	3417	0.945177	1.04363
94	S	447	4102	0.840723	0.924262
94	T	310	4142	0.884863	0.974702
94	V	544	8094	0.895376	0.986717
94	W	569	8340	0.893964	0.985102
94	Y	301	5533	0.913593	1.00753
95	*	8562	361	0.0236775	-0.00939619
95	A	1489	5801	0.691442	0.753675
95	C	410	6584	0.902312	0.994643
95	D	835	1413	0.493246	0.527191
95	E	5857	250	0.023963	-0.00906992
95	F	7561	429	0.031604	-0.000338447
95	G	2497	3100	0.416601	0.439606
95	H	1208	6646	0.759875	0.831875
95	I	7911	897	0.0612256	0.0335108
95	K	3517	3760	0.380778	0.398671
95	L	4794	1276	0.132769	0.115265
95	M	3507	4593	0.429649	0.454517
95	P	8887	893	0.0546393	0.0259844
95	Q	759	7740	0.854346	0.93983
95	R	6870	5627	0.320246	0.329499
95	S	265	6269	0.93154	1.02804
95	T	5856	412	0.0388936	0.00799158
95	V	9523	1154	0.0651599	0.0380066
95	W	7368	567	0.0423872	0.0119837
95	Y	5433	1865	0.16489	0.15197
96	*	5334	467	0.0479443	0.018334
96	A	181	4623	0.93627	1.03345
96	C	401	6405	0.901838	0.994101
96	D	235	6416	0.940134	1.03786
96	E	287	4724	0.904467	0.997105
96	F	51	2504	0.965801	1.06719
96	G	525	5380	0.854953	0.940524
96	H	165	4701	0.942488	1.04055
96	I	180	2568	0.891376	0.982145
96	K	131	4977	0.956242	1.05627
96	L	245	4764	0.917929	1.01249
96	M	116	2776	0.932272	1.02888
96	N	330	6325	0.916836	1.01124
96	Q	173	6515	0.955871	1.05585
96	R	372	7821	0.923623	1.01899
96	S	523	5799	0.864456	0.951383
96	T	255	4660	0.913129	1.007
96	V	124	5823	0.964299	1.06548
96	W	458	6644	0.89298	0.983978
96	Y	294	4779	0.903379	0.995862
97	*	6649	468	0.0389103	0.0080106
97	A	169	3433	0.921162	1.01618
97	C	664	8053	0.874622	0.963001
97	D	180	5050	0.941648	1.03959
97	E	519	9990	0.917161	1.01161
97	F	189	5717	0.945648	1.04416
97	G	513	6178	0.873848	0.962116
97	H	271	4616	0.907384	1.00044
97	I	310	5768	0.914546	1.00862
97	L	172	6745	0.957548	1.05776
97	M	178	4426	0.93465	1.0316
97	N	57	2170	0.956327	1.05637
97	P	516	4150	0.822255	0.903159
97	Q	363	4649	0.880476	0.96969
97	R	422	7269	0.908322	1.00151
97	S	637	9592	0.896494	0.987994
97	T	427	4697	0.86352	0.950314
97	V	495	5851	0.871776	0.959748
97	W	306	6300	0.922131	1.01729
97	Y	506	6525	0.881196	0.970512
98	*	7735	274	0.0199683	-0.0136348
98	A	345	6296	0.913019	1.00688
98	C	377	6209	0.904517	0.997162
98	D	664	8420	0.879428	0.968492
98	E	349	5790	0.905146	0.997881
98	F	844	2017	0.578875	0.625042
98	G	263	5916	0.928256	1.02429
98	H	513	6872	0.885124	0.975002
98	I	10893	943	0.047432	0.0177485
98	K	239	3637	0.897467	0.989106
98	L	3910	4328	0.389007	0.408074
98	M	514	9607	0.914898	1.00903
98	N	194	5277	0.939925	1.03762
98	P	3181	3420	0.382108	0.40019
98	Q	274	3985	0.893224	0.984258
98	R	483	7555	0.89997	0.991966
98	S	1575	4454	0.61928	0.671213
98	V	342	6364	0.914554	1.00863
98	W	9938	2492	0.126051	0.107588
98	Y	892	7689	0.832161	0.914479
99	*	7556	465	0.0341873	0.00261355
99	A	545	9209	0.906709	0.999667
99	C	181	3084	0.907411	1.00047
99	D	1785	5157	0.62431	0.676961
99	E	389	6126	0.900578	0.992661
99	F	2650	3245	0.413261	0.43579
99	G	237	4398	0.914338	1.00838
99	H	131	5475	0.960063	1.06064
99	I	543	4790	0.835363	0.918137
99	K	1878	5074	0.608465	0.658855
99	L	3011	3793	0.420147	0.443658
99	M	951	4403	0.727003	0.794312
99	N	529	8249	0.899692	0.991648
99	Q	1000	6065	0.77721	0.851684
99	R	2780	2825	0.368886	0.385082
99	S	273	4858	0.910996	1.00457
99	T	86	2235	0.937297	1.03462
99	V	3962	3977	0.366032	0.38182
99	W	1428	3329	0.572814	0.618115
99	Y	603	7913	0.883014	0.97259
100	*	5204	320	0.0341608	0.0025833
100	A	238	4678	0.918736	1.01341
100	C	259	2822	0.862394	0.949027
100	D	426	8267	0.917778	1.01232
100	E	415	8894	0.924965	1.02053
100	F	224	3881	0.908806	1.00206
100	G	104	2180	0.923412	1.01875
100	H	260	6242	0.932473	1.02911
100	I	43	3756	0.980485	1.08397
100	L	330	5766	0.909503	1.00286
100	M	272	4155	0.897818	0.989507
100	N	422	6799	0.902601	0.994973
100	P	222	5269	0.931748	1.02828
100	Q	72	2089	0.943466	1.04167
100	R	164	2631	0.902225	0.994543
100	S	388	5503	0.890805	0.981493
100	T	217	4001	0.913832	1.00781
100	V	238	4045	0.907199	1.00023
100	W	95	2277	0.93237	1.02899
100	Y	210	2446	0.870123	0.957859
101	*	6120	136	0.0126207	-0.0220311
101	A	122	5567	0.963298	1.06433
101	C	271	2544	0.843739	0.92771
101	D	5334	501	0.051256	0.0221183
101	E	2258	1496	0.27593	0.278858
101	F	123	3686	0.945166	1.04361
101	G	190	5827	0.946352	1.04497
101	H	153	4719	0.94664	1.0453
101	I	339	5091	0.896244	0.987709
101	K	321	4464	0.888875	0.979288
101	L	379	6160	0.90337	0.995851
101	M	339	5407	0.901712	0.993957
101	N	244	4929	0.920756	1.01572
101	P	8523	607	0.0393524	0.00851582
101	Q	377	3945	0.857527	0.943466
101	R	342	6310	0.913885	1.00787
101	S	214	5698	0.938707	1.03623
101	T	376	6610	0.910005	1.00343
101	V	463	8198	0.91059	1.0041
101	W	231	6982	0.945608	1.04412
102	*	5491	325	0.0329233	0.00116919
102	A	241	5502	0.929236	1.02541
102	C	244	4925	0.920697	1.01565
102	D	313	7131	0.9291	1.02525
102	E	299	6695	0.92795	1.02394
102	F	152	4803	0.947849	1.04668
102	G	421	4719	0.865723	0.952831
102	H	113	2378	0.92369	1.01907
102	I	774	11690	0.896772	0.988312
102	L	439	5557	0.879241	0.968278
102	M	168	4375	0.937417	1.03476
102	N	388	4512	0.869941	0.957651
102	P	4914	212	0.024214	-0.00878317
102	Q	543	4969	0.840347	0.923832
102	R	483	6743	0.889258	0.979726
102	S	419	5645	0.885705	0.975665
102	T	213	3294	0.898941	0.99079
102	V	238	5145	0.925563	1.02121
102	W	452	8059	0.911154	1.00475
102	Y	541	8368	0.898958	0.990809
103	*	9050	373	0.0231577	-0.00999019
103	A	381	5522	0.892893	0.983879
103	C	224	3451	0.898596	0.990396
103	D	3661	5391	0.45858	0.487577
103	E	373	5812	0.899623	0.99157
103	G	263	6073	0.929981	1.02626
[truncated: 4,048 more rows]

## Sheet: FRET scores rep 2
Position	aa	Counts (uncut)	Counts (cut)	functional score (unnormalized)	functional score (normalized)
WT	WT	13478	166968	0.89	1
1	*	12807	936	0.0459833	0.012831
1	A	0	4607	1	1.12734
1	C	56	5938	0.985902	1.11087
1	D	241	4849	0.92992	1.04547
1	E	1441	8907	0.803012	0.897211
1	F	37	3700	0.985064	1.10989
1	G	44	4341	0.984864	1.10965
1	H	746	6058	0.842658	0.943526
1	I	179	6545	0.960182	1.08082
1	K	541	6573	0.889046	0.997718
1	L	156	1523	0.865566	0.970287
1	M	593	10072	0.918043	1.03159
1	N	238	5466	0.938067	1.05498
1	P	211	2435	0.883867	0.991667
1	Q	337	3751	0.880105	0.987272
1	R	321	1132	0.699313	0.776067
1	T	509	5182	0.870369	0.975899
1	V	117	2087	0.921654	1.03581
1	W	859	6981	0.84276	0.943645
1	Y	586	2288	0.720278	0.800559
2	*	15458	1165	0.0473502	0.0144278
2	A	501	6497	0.895315	1.00504
2	C	388	7122	0.923697	1.0382
2	D	8894	1981	0.12808	0.108738
2	E	7303	4753	0.300319	0.309952
2	F	421	6694	0.912939	1.02563
2	H	520	6232	0.887689	0.996132
2	I	845	8640	0.870856	0.976468
2	K	966	6882	0.824513	0.922329
2	L	163	6941	0.965616	1.08717
2	M	1109	6673	0.798724	0.892201
2	N	0	4425	1	1.12734
2	P	202	527	0.632432	0.697934
2	Q	3505	5662	0.515824	0.56171
2	R	285	5136	0.92239	1.03667
2	S	468	3690	0.838708	0.938911
2	T	647	6271	0.864722	0.969301
2	V	685	6358	0.859577	0.963291
2	W	1071	6492	0.799906	0.893582
2	Y	182	5066	0.94834	1.06699
3	*	9217	297	0.020809	-0.0165783
3	A	13990	910	0.0411337	0.00716554
3	C	10527	2266	0.124314	0.104339
3	D	13986	655	0.0299608	-0.00588694
3	E	16572	1360	0.0513439	0.0190933
3	G	18581	1008	0.0345415	-0.000535637
3	H	13490	528	0.0251634	-0.0114913
3	I	498	3844	0.835813	0.935529
3	L	197	4596	0.938973	1.05604
3	M	1636	7846	0.759781	0.846707
3	N	8869	431	0.031054	-0.00460976
3	P	15505	4723	0.167286	0.154539
3	Q	12604	213	0.0110223	-0.0280113
3	R	14693	721	0.0313479	-0.00426645
3	S	8508	777	0.056808	0.0254767
3	T	6322	340	0.0342534	-0.000872197
3	V	5173	7028	0.472572	0.511183
3	W	101	5509	0.972953	1.09574
3	Y	6475	1327	0.119067	0.0982087
4	*	11851	1080	0.056694	0.0253435
4	A	698	6156	0.853296	0.955954
4	C	188	5115	0.947211	1.06567
4	D	15394	1602	0.0642242	0.0341405
4	E	9180	241	0.0170191	-0.0210058
4	F	9420	2785	0.163166	0.149727
4	G	12761	1553	0.0742975	0.0459083
4	H	938	9673	0.871812	0.977584
4	I	209	3127	0.907981	1.01984
4	K	0	3238	1	1.12734
4	L	1132	10883	0.863768	0.968187
4	M	925	7197	0.836902	0.936801
4	N	2111	2016	0.386436	0.410556
4	P	568	8155	0.904477	1.01574
4	Q	901	1989	0.592814	0.651652
4	S	697	3974	0.789925	0.881922
4	T	491	8482	0.919308	1.03307
4	V	474	4956	0.873346	0.979377
4	W	10152	508	0.0319468	-0.00356682
4	Y	6566	1709	0.146507	0.130265
5	*	14449	727	0.032117	-0.00336794
5	A	685	7559	0.879192	0.986206
5	C	1001	9141	0.8576	0.960982
5	D	6764	4698	0.314159	0.32612
5	E	4513	6803	0.498533	0.54151
5	F	0	3915	1	1.12734
5	G	1864	9688	0.77415	0.863493
5	H	402	3750	0.86018	0.963996
5	I	376	7523	0.929554	1.04504
5	L	584	4501	0.835605	0.935286
5	M	471	2793	0.796367	0.889448
5	N	598	8203	0.900464	1.01106
5	P	441	2972	0.81633	0.912768
5	Q	185	3837	0.931873	1.04775
5	R	589	10241	0.919787	1.03363
5	S	922	7794	0.847909	0.94966
5	T	196	1323	0.816569	0.913048
5	V	505	7840	0.911021	1.02339
5	W	443	5950	0.898558	1.00883
5	Y	129	3305	0.944123	1.06206
6	*	8511	309	0.0233839	-0.0135702
6	A	8855	1923	0.125279	0.105466
6	C	3889	2245	0.275735	0.281233
6	D	13993	719	0.0327764	-0.00259768
6	E	8273	696	0.0525667	0.0205219
6	F	392	993	0.625556	0.689902
6	G	17111	1076	0.0398204	0.00563129
6	H	4472	224	0.0319777	-0.00353069
6	I	1451	6774	0.754835	0.840929
6	K	8503	177	0.0135424	-0.0250673
6	L	1632	6189	0.714369	0.793655
6	N	10573	686	0.0410341	0.0070492
6	P	14136	408	0.0186793	-0.0190662
6	Q	2179	4342	0.567878	0.622521
6	R	14309	619	0.0277383	-0.00848324
6	S	8756	1234	0.0850408	0.0584588
6	T	5543	2560	0.233474	0.231862
6	V	728	8910	0.889766	0.998559
6	W	7382	5184	0.316536	0.328897
6	Y	6083	6021	0.394959	0.420513
7	*	8682	433	0.0318441	-0.00368676
7	C	101	3517	0.958273	1.07859
7	D	11743	544	0.029646	-0.00625467
7	E	6284	998	0.0948092	0.0698706
7	F	10109	207	0.0133245	-0.0253218
7	G	18326	1004	0.0348712	-0.000150424
7	H	15487	802	0.0330247	-0.00230762
7	I	12168	2818	0.132498	0.113899
7	K	11491	501	0.0279502	-0.00823578
7	L	5817	0	0	-0.0408879
7	M	24875	1891	0.0477418	0.0148853
7	N	11275	512	0.0290773	-0.00691904
7	P	9089	2534	0.155311	0.140551
7	Q	6278	419	0.0421601	0.00836461
7	R	10742	971	0.0562603	0.0248368
7	S	0	3137	1	1.12734
7	T	873	5157	0.795744	0.88872
7	V	200	6102	0.952655	1.07203
7	W	19924	835	0.0268959	-0.00946746
7	Y	10775	714	0.0418717	0.00802769
8	*	5294	602	0.0697626	0.0406105
8	A	1155	8503	0.829211	0.927817
8	C	398	11271	0.949178	1.06796
8	D	12163	3802	0.170917	0.158782
8	E	7394	1980	0.150097	0.134459
8	G	14996	595	0.0255	-0.0110982
8	H	979	7548	0.835653	0.935343
8	I	9734	700	0.0452792	0.0120085
8	K	2974	126	0.0271817	-0.00913347
8	L	780	7358	0.861521	0.965562
8	M	187	5633	0.952076	1.07135
8	N	1229	4761	0.718693	0.798706
8	P	7519	167	0.0144363	-0.024023
8	Q	0	2174	1	1.12734
8	R	8606	1749	0.11819	0.0971842
8	S	1056	18427	0.920052	1.03394
8	T	522	2904	0.785819	0.877125
8	V	6175	5987	0.390029	0.414754
8	W	210	6015	0.949724	1.0686
8	Y	298	4287	0.904649	1.01594
9	*	11695	430	0.0236744	-0.0132308
9	A	8069	973	0.0736675	0.0451723
9	C	4692	804	0.101535	0.0777277
9	D	9554	759	0.0497846	0.0172717
9	E	8223	394	0.0306317	-0.00510318
9	F	3147	229	0.0457928	0.0126084
9	G	12394	727	0.0372439	0.00262139
9	H	10707	612	0.036327	0.00155022
9	I	11622	913	0.0492571	0.0166555
9	K	9575	665	0.0437974	0.0102774
9	L	3606	115	0.0205991	-0.0168235
9	M	8257	229	0.0179621	-0.0199041
9	N	18221	924	0.0323615	-0.00308233
9	Q	12639	569	0.0288343	-0.00720296
9	R	13885	456	0.0211997	-0.0161219
9	S	7998	166	0.0135033	-0.025113
9	T	7194	431	0.0380096	0.00351592
9	V	10304	172	0.0108889	-0.0281672
9	W	19953	1429	0.0451021	0.0118015
9	Y	15286	661	0.0277276	-0.00849584
10	*	11925	905	0.0476646	0.0147951
10	A	9229	432	0.0299462	-0.00590403
10	C	12935	1197	0.0575196	0.026308
10	D	8453	326	0.0248036	-0.0119117
10	E	23931	1049	0.0280966	-0.00806472
10	F	11626	466	0.0257537	-0.0108017
10	G	11484	1275	0.0682251	0.0388144
10	H	6801	130	0.0124493	-0.0263442
10	I	10019	457	0.0292036	-0.00677152
10	K	14946	333	0.0144811	-0.0239707
10	L	15188	783	0.0328819	-0.00247443
10	M	13667	756	0.0351968	0.000229927
10	N	14215	569	0.0257197	-0.0108415
10	P	4518	293	0.0410156	0.00702756
10	Q	9027	232	0.0166671	-0.0214169
10	R	11151	643	0.0366356	0.0019108
10	T	478	3355	0.822346	0.919797
10	V	13149	724	0.0350406	4.73764e-05
10	W	11146	718	0.0407523	0.00671999
10	Y	13415	1315	0.0607219	0.0300489
11	*	10513	966	0.0571367	0.0258606
11	A	18822	2495	0.0803938	0.0530302
11	C	13015	925	0.0447734	0.0114175
11	D	23425	1255	0.0341272	-0.00101967
11	E	4617	264	0.0363399	0.00156533
11	F	18975	1268	0.0422108	0.00842382
11	H	15905	471	0.0191559	-0.0185094
11	I	18741	850	0.029043	-0.00695906
11	K	8686	789	0.0565205	0.0251407
11	L	12602	756	0.0380581	0.00357256
11	M	14286	449	0.0203068	-0.0171649
11	N	23708	623	0.0170352	-0.0209869
11	P	14434	893	0.0392024	0.00490935
11	Q	18506	910	0.0314112	-0.00419254
11	R	12447	696	0.0355659	0.00066104
11	S	7764	1668	0.124102	0.104092
11	T	14098	304	0.0140217	-0.0245074
11	V	14251	987	0.0436808	0.0101411
11	W	11211	327	0.0188732	-0.0188398
11	Y	10652	613	0.0365652	0.00182848
12	*	15091	419	0.0179817	-0.0198811
12	A	1496	5348	0.702171	0.779405
12	C	9222	6379	0.313275	0.325088
12	D	7902	228	0.0186736	-0.0190729
12	E	13687	562	0.0263657	-0.0100868
12	F	10592	1230	0.0711369	0.042216
12	G	8815	406	0.0294798	-0.00644885
12	H	5000	2289	0.231904	0.230028
12	I	4462	725	0.0967865	0.0721805
12	L	9144	4651	0.251188	0.252556
12	M	2313	4612	0.568037	0.622707
12	N	12084	1474	0.074456	0.0460935
12	P	7496	571	0.0478338	0.0149928
12	Q	609	5213	0.849518	0.951539
12	R	0	4953	1	1.12734
12	S	6142	4077	0.304479	0.314812
12	T	8862	708	0.0500516	0.0175836
12	V	7295	3703	0.250806	0.25211
12	W	10916	1136	0.0642248	0.0341411
12	Y	9488	1064	0.0688646	0.0395614
13	*	10477	926	0.0550789	0.0234567
13	A	400	7793	0.927791	1.04298
13	C	748	10325	0.901024	1.01171
13	D	18279	444	0.0157668	-0.0224686
13	E	26909	1084	0.0258798	-0.0106545
13	F	18835	1599	0.05302	0.0210514
13	G	10986	327	0.0192523	-0.0183969
13	H	23861	702	0.0190335	-0.0186525
13	I	656	10458	0.913148	1.02587
13	K	17789	296	0.0108547	-0.0282072
13	L	13687	253	0.0120439	-0.0268179
13	M	10716	594	0.0352677	0.000312687
13	N	11199	316	0.0182691	-0.0195455
13	P	4109	865	0.121909	0.101529
13	Q	15374	827	0.0342606	-0.000863813
13	R	7665	566	0.0464376	0.0133616
13	S	6690	1708	0.14411	0.127465
13	T	253	7563	0.951725	1.07094
13	W	13639	1076	0.0494559	0.0168877
13	Y	14511	1063	0.0460852	0.01295
14	*	11450	906	0.049596	0.0170514
14	A	11193	575	0.0327693	-0.00260593
14	C	15705	699	0.0285161	-0.00757459
14	D	13584	483	0.0229123	-0.0141211
14	F	11143	590	0.0337411	-0.00147066
14	G	11265	988	0.0546791	0.0229896
14	H	19432	1314	0.0426919	0.00898588
14	I	11093	275	0.0160863	-0.0220954
14	K	18288	1784	0.0604459	0.0297265
14	L	16838	975	0.0367836	0.00208363
14	M	10444	489	0.0299537	-0.00589521
14	N	14160	829	0.0371753	0.00254125
14	P	8107	533	0.0415575	0.0076606
14	Q	11427	468	0.0262999	-0.0101636
14	R	7895	652	0.0516511	0.0194522
14	S	16100	1288	0.050116	0.0176589
14	T	10372	333	0.0207347	-0.016665
14	V	20090	759	0.0243103	-0.012488
14	W	21150	713	0.0217493	-0.0154798
14	Y	8110	460	0.0360582	0.0012362
15	*	10479	976	0.0578704	0.0267178
15	A	206	8152	0.963097	1.08423
15	C	899	7565	0.84732	0.948972
15	D	0	8082	1	1.12734
15	E	758	9806	0.895088	1.00478
15	F	902	6441	0.824849	0.922721
15	H	494	7220	0.906005	1.01753
15	I	311	5326	0.918661	1.03231
15	K	159	736	0.753256	0.839084
15	L	172	5300	0.9531	1.07255
15	M	783	8290	0.874725	0.980988
15	N	986	7077	0.825588	0.923585
15	P	1083	6948	0.808834	0.904011
15	Q	168	5678	0.957062	1.07718
15	R	0	5371	1	1.12734
15	S	477	2991	0.805272	0.89985
15	T	509	6356	0.89172	1.00084
15	V	409	4544	0.87991	0.987044
15	W	887	9985	0.881292	0.988659
15	Y	538	5718	0.875146	0.981479
16	*	13378	796	0.0377591	0.00322326
16	A	574	7465	0.895583	1.00535
16	D	12391	885	0.0449845	0.0116642
16	E	17215	1373	0.0499708	0.0174893
16	F	9730	1196	0.0749864	0.0467131
16	G	659	9080	0.900862	1.01152
16	H	14556	284	0.012704	-0.0260468
16	I	10977	149	0.00887254	-0.0305227
16	K	10703	1078	0.0622872	0.0318776
16	L	5895	3045	0.254098	0.255956
16	M	12543	885	0.0444637	0.0110557
16	N	8827	2412	0.152694	0.137492
16	P	3643	0	0	-0.0408879
16	Q	4529	1175	0.146102	0.129793
16	R	11451	674	0.0373674	0.00276568
16	S	301	3502	0.8847	0.99264
16	T	299	4881	0.915009	1.02805
16	V	410	8427	0.931296	1.04707
16	W	9151	729	0.0499157	0.0174249
16	Y	6588	351	0.0339447	-0.00123286
17	*	15158	997	0.0415746	0.00768056
17	A	274	7830	0.949613	1.06847
17	C	509	7321	0.904632	1.01593
17	D	16135	694	0.0275841	-0.00866345
17	E	10898	750	0.0434164	0.0098322
17	F	6257	3514	0.270277	0.274857
17	G	16436	2059	0.0763134	0.0482633
17	H	8964	21	0.00154263	-0.0390857
17	I	213	6426	0.952145	1.07143
17	K	14692	508	0.022295	-0.0148423
17	L	919	5274	0.791004	0.883182
17	N	13704	1216	0.0552845	0.0236968
17	P	6186	514	0.0519517	0.0198034
17	Q	12995	3220	0.140463	0.123204
17	R	15376	716	0.0297954	-0.00608015
17	S	3199	7048	0.592337	0.651095
17	T	341	4794	0.902645	1.0136
17	V	907	5046	0.785825	0.877132
17	W	23660	726	0.0198352	-0.0177159
17	Y	18645	1735	0.0578211	0.0266602
18	*	11844	1577	0.0807227	0.0534144
18	A	276	4763	0.919232	1.03298
18	C	60	2320	0.962265	1.08325
18	D	12346	651	0.0336066	-0.00162779
18	E	15387	1367	0.0553481	0.0237711
18	F	5358	0	0	-0.0408879
18	G	3123	7875	0.624485	0.688651
18	H	8581	141	0.0107205	-0.0283639
18	I	208	4177	0.929795	1.04532
18	K	16290	1146	0.0443388	0.0109098
18	L	458	6482	0.90323	1.01429
18	M	729	5753	0.838828	0.939051
18	N	7106	2849	0.209119	0.20341
18	P	8739	0	0	-0.0408879
18	Q	26128	1254	0.0306813	-0.00504519
18	R	9854	83	0.00552428	-0.0344343
18	S	192	5323	0.948144	1.06676
18	T	1229	6052	0.764573	0.852305
18	W	15911	881	0.0352304	0.000269208
18	Y	16785	2049	0.074509	0.0461554
19	*	16490	671	0.0261347	-0.0103567
19	A	404	5929	0.906355	1.01794
19	C	287	5554	0.927339	1.04245
19	D	701	10089	0.904687	1.01599
19	E	522	4942	0.861951	0.966064
19	F	406	11255	0.948139	1.06675
19	G	312	3843	0.89039	0.999288
19	H	593	3238	0.782662	0.873437
19	I	65	2414	0.960773	1.08151
19	K	609	9179	0.908594	1.02055
19	L	654	7019	0.876208	0.982719
19	M	673	7392	0.878696	0.985626
19	N	844	9722	0.883677	0.991445
19	P	155	6452	0.964853	1.08628
19	R	198	4783	0.940938	1.05834
19	S	777	6042	0.836823	0.93671
19	T	562	4995	0.854261	0.957081
19	V	674	5383	0.840439	0.940934
19	W	45	5957	0.988675	1.11411
19	Y	1165	7425	0.807813	0.902819
20	*	8622	301	0.0225055	-0.0145964
20	A	694	9249	0.897847	1.008
20	C	427	10489	0.941861	1.05942
20	D	26723	1684	0.0399015	0.005726
20	E	13504	617	0.0292513	-0.00671574
20	F	764	10171	0.897749	1.00788
20	G	8584	702	0.0511741	0.0188949
20	H	5211	174	0.0215469	-0.0157163
20	I	0	7409	1	1.12734
20	K	8107	371	0.0292965	-0.00666292
20	L	377	6797	0.922422	1.03671
20	M	195	1741	0.854824	0.957738
20	N	14760	324	0.0142703	-0.024217
20	P	6415	473	0.0463724	0.0132855
20	Q	12892	758	0.0373287	0.00272046
20	R	17504	577	0.0212772	-0.0160313
20	S	2270	6299	0.646649	0.714543
20	T	1030	7660	0.830642	0.929488
20	W	7850	127	0.010557	-0.0285549
20	Y	19668	821	0.026792	-0.00958882
21	*	16976	171	0.00659935	-0.0331783
21	A	602	5428	0.856042	0.959161
21	C	600	5509	0.858263	0.961756
21	D	1326	7580	0.790357	0.882426
21	E	435	6200	0.903844	1.01501
21	F	234	7023	0.951908	1.07115
21	G	576	6165	0.875911	0.982373
21	H	351	7749	0.935732	1.05226
21	I	1564	5557	0.70089	0.777909
21	K	0	6345	1	1.12734
21	L	218	6703	0.953003	1.07243
21	M	521	4118	0.83904	0.939299
21	N	2616	5859	0.596298	0.655722
21	P	4253	203	0.030518	-0.00523595
21	Q	838	3920	0.755203	0.841359
21	R	0	3805	1	1.12734
21	S	502	3971	0.839148	0.939425
21	V	198	3989	0.930004	1.04557
21	W	334	6468	0.927386	1.04251
21	Y	0	7942	1	1.12734
22	*	13079	658	0.0321138	-0.00337173
22	A	61	1930	0.954267	1.07391
22	D	225	5607	0.942643	1.06033
22	E	1021	7086	0.820696	0.917869
22	F	640	7639	0.887283	0.995658
22	G	588	8296	0.902958	1.01397
22	H	322	6459	0.929721	1.04523
22	I	318	5226	0.915528	1.02865
22	K	442	8586	0.927594	1.04275
22	L	253	7353	0.950415	1.06941
22	M	649	4974	0.834833	0.934385
22	N	330	5535	0.917093	1.03048
22	P	14407	456	0.0204473	-0.0170009
22	Q	855	3409	0.724482	0.805469
22	R	1061	7309	0.819598	0.916586
22	S	667	5793	0.851365	0.953697
22	T	319	2283	0.825171	0.923097
22	V	165	2796	0.917868	1.03139
22	W	349	4555	0.895915	1.00574
22	Y	0	6241	1	1.12734
23	*	14612	679	0.0297349	-0.00615081
23	A	0	6287	1	1.12734
23	C	379	2348	0.803373	0.897632
23	D	0	6313	1	1.12734
23	E	329	5586	0.918016	1.03156
23	F	1178	6647	0.788195	0.8799
23	H	544	8299	0.909593	1.02172
23	I	324	4261	0.896622	1.00657
23	K	378	9844	0.944979	1.06306
23	L	575	7043	0.889844	0.99865
23	M	1126	10199	0.856602	0.959815
23	N	918	6978	0.833696	0.933056
23	P	305	6382	0.932432	1.0484
23	Q	260	10050	0.962253	1.08324
23	R	1032	7536	0.828057	0.926469
23	S	512	4410	0.85031	0.952465
23	T	656	9186	0.902296	1.0132
23	V	174	4657	0.946384	1.0647
23	W	0	3332	1	1.12734
23	Y	432	5103	0.886239	0.994438
24	*	13724	837	0.0386665	0.0042833
24	A	316	3503	0.879676	0.986771
24	C	632	5573	0.853276	0.95593
24	D	85	6228	0.979725	1.10365
24	E	428	6314	0.906796	1.01845
24	F	0	4419	1	1.12734
24	G	0	4986	1	1.12734
24	H	190	2437	0.89428	1.00383
24	I	0	1194	1	1.12734
24	K	472	4238	0.855524	0.958556
24	L	263	2824	0.876261	0.982781
24	M	186	4050	0.934896	1.05128
24	N	743	829	0.423909	0.454333
24	P	414	5610	0.899363	1.00977
24	Q	1399	6009	0.739087	0.822532
24	R	797	7331	0.858482	0.962012
24	S	328	2918	0.854379	0.957219
24	V	101	4103	0.964018	1.0853
24	W	339	2607	0.835303	0.934933
24	Y	244	4364	0.921847	1.03604
25	*	16667	204	0.0080075	-0.0315333
25	A	402	10414	0.944705	1.06274
25	C	598	5421	0.856703	0.959934
25	D	3657	5731	0.508243	0.552854
25	E	783	10603	0.899302	1.0097
25	F	425	8559	0.92998	1.04554
25	G	944	13263	0.90259	1.01354
25	H	622	9070	0.90581	1.0173
25	I	768	13460	0.920372	1.03431
25	K	488	1927	0.722548	0.80321
25	L	1229	12317	0.868585	0.973815
25	M	221	7396	0.956655	1.0767
25	N	997	8243	0.845024	0.94629
25	P	98	1982	0.930256	1.04586
25	Q	592	8233	0.901689	1.01249
25	R	111	694	0.804816	0.899318
25	S	935	7009	0.831757	0.930791
25	V	886	12713	0.904425	1.01568
25	W	883	14264	0.91419	1.02709
25	Y	718	8602	0.887655	0.996092
26	*	21742	0	0	-0.0408879
26	A	190	3302	0.919753	1.03359
26	C	255	4036	0.912574	1.0252
26	D	345	8682	0.943171	1.06095
26	E	609	9754	0.913516	1.0263
26	F	612	6929	0.881892	0.98936
26	G	951	4179	0.743462	0.827643
26	H	186	6495	0.958384	1.07872
26	I	227	3069	0.899156	1.00953
26	K	812	5714	0.822723	0.920237
26	L	459	10370	0.937106	1.05386
26	M	0	1761	1	1.12734
26	N	142	1023	0.826123	0.924209
26	P	6302	2931	0.23473	0.233329
26	Q	792	7629	0.863996	0.968453
26	R	570	742	0.461934	0.498755
26	S	99	6883	0.978656	1.1024
26	V	847	11485	0.899423	1.00984
26	W	1362	12886	0.861871	0.965971
26	Y	202	9477	0.968692	1.09076
29	*	15264	754	0.0315498	-0.00403063
29	A	764	11667	0.909676	1.02182
29	C	10774	445	0.0265172	-0.00990983
29	D	20133	1195	0.0376703	0.00311954
29	E	16702	1046	0.0396645	0.00544921
29	F	29512	1210	0.0263279	-0.010131
29	H	15275	624	0.0262346	-0.01024
29	I	16166	631	0.025096	-0.0115701
29	K	8541	1132	0.0803824	0.0530168
29	L	667	0	0	-0.0408879
29	M	2098	265	0.0768965	0.0489446
29	N	13695	905	0.0417615	0.00789896
29	P	13068	938	0.0451984	0.011914
29	Q	22823	760	0.0214893	-0.0157835
29	R	5740	763	0.0805997	0.0532707
29	S	6025	5056	0.356265	0.37531
29	T	14993	1318	0.0547983	0.0231289
29	V	21793	463	0.0138177	-0.0247456
29	Y	15415	1060	0.0433827	0.00979288
30	*	18630	1540	0.0516976	0.0195066
30	A	825	13292	0.913983	1.02685
30	C	0	4700	1	1.12734
30	D	28748	692	0.015627	-0.0226321
30	E	13790	1426	0.0638439	0.0336962
30	F	14	3376	0.993751	1.12004
30	G	4053	1036	0.144259	0.127639
30	H	13898	116	0.00547441	-0.0344925
30	I	705	6561	0.859896	0.963664
30	K	12371	589	0.0304438	-0.00532261
30	N	3092	6624	0.585553	0.643169
30	P	5088	3811	0.330646	0.345381
30	Q	3727	4387	0.437029	0.46966
30	R	24054	718	0.0193058	-0.0183344
30	S	48	6913	0.989581	1.11517
30	T	398	9855	0.942297	1.05993
30	V	665	4647	0.821702	0.919044
30	W	5911	243	0.0263963	-0.010051
30	Y	14693	1017	0.0436557	0.0101118
31	*	3887	0	0	-0.0408879
31	A	993	115	0.0709578	0.0420068
31	C	6742	417	0.0391922	0.00489746
31	E	1273	93	0.0459658	0.0128105
31	F	0	1292	1	1.12734
31	G	1664	200	0.0734453	0.0449127
31	H	485	3363	0.820563	0.917714
31	I	1680	0	0	-0.0408879
31	K	2485	0	0	-0.0408879
31	L	1670	153	0.0569787	0.025676
31	M	2058	1998	0.390346	0.415124
31	N	5560	177	0.0205632	-0.0168654
31	P	4748	809	0.101019	0.0771253
31	Q	1631	0	0	-0.0408879
31	R	2911	417	0.0863187	0.0599517
31	S	3990	292	0.0460421	0.0128997
31	T	5036	253	0.0320697	-0.00342324
31	V	6897	0	0	-0.0408879
31	Y	8	1470	0.991816	1.11778
32	*	1107	71	0.0405821	0.00652115
32	A	173	1180	0.818127	0.914868
32	C	109	4528	0.964784	1.0862
32	D	3537	0	0	-0.0408879
32	E	1753	0	0	-0.0408879
32	F	0	1437	1	1.12734
32	G	13282	1136	0.0533949	0.0214894
32	H	1397	0	0	-0.0408879
32	I	0	831	1	1.12734
32	K	2437	424	0.102932	0.0793601
32	M	524	4431	0.847951	0.949709
32	N	3011	240	0.0499421	0.0174557
32	P	3161	158	0.0319127	-0.00360669
32	R	991	0	0	-0.0408879
32	S	3429	1176	0.18446	0.174602
32	W	5090	206	0.0259971	-0.0105173
32	Y	1167	137	0.0718588	0.0430593
33	*	4224	458	0.0667363	0.0370751
33	A	110	501	0.750233	0.835553
33	C	1	3170	0.999522	1.12678
33	E	204	2496	0.889737	0.998524
33	F	0	3180	1	1.12734
33	G	700	5498	0.838186	0.938301
33	H	0	1392	1	1.12734
33	I	0	321	1	1.12734
33	K	0	4400	1	1.12734
33	L	0	1671	1	1.12734
33	M	382	1973	0.773051	0.862209
33	N	58	1869	0.95506	1.07484
33	P	4730	290	0.0388632	0.00451304
33	Q	181	2519	0.901752	1.01256
33	R	52	1063	0.930948	1.04667
33	S	0	832	1	1.12734
33	T	89	2881	0.955254	1.07506
33	V	321	2573	0.840924	0.9415
33	W	363	3531	0.865141	0.969791
33	Y	372	4819	0.895215	1.00492
34	*	7569	431	0.0361946	0.0013956
34	A	200	2534	0.893115	1.00247
34	C	0	2602	1	1.12734
34	D	0	464	1	1.12734
34	E	0	2348	1	1.12734
34	F	359	2038	0.789204	0.881079
34	G	0	2405	1	1.12734
34	H	678	3049	0.747845	0.832763
34	I	190	4568	0.940673	1.05803
34	K	253	2773	0.87847	0.985363
34	L	80	4746	0.975078	1.09822
34	M	446	1621	0.705621	0.783435
34	N	0	2254	1	1.12734
34	P	1190	966	0.348687	0.366457
34	Q	216	2966	0.900556	1.01116
34	R	308	3791	0.89032	0.999206
34	S	0	1950	1	1.12734
34	T	698	3659	0.775643	0.865238
34	V	309	7092	0.938029	1.05494
34	W	363	4749	0.896137	1.006
34	Y	299	1122	0.712213	0.791136
35	*	8381	152	0.0118195	-0.02708
35	A	386	7260	0.925396	1.04018
35	C	127	3031	0.940262	1.05755
35	D	214	1929	0.856007	0.95912
35	F	192	3169	0.915862	1.02904
35	G	267	5256	0.928482	1.04379
35	H	0	3144	1	1.12734
35	I	0	626	1	1.12734
35	K	596	4697	0.838643	0.938836
35	L	624	3271	0.775639	0.865232
35	M	72	4550	0.976568	1.09996
35	N	153	1986	0.895404	1.00514
35	Q	179	2412	0.898854	1.00918
35	R	124	2100	0.917824	1.03134
35	S	198	7593	0.961964	1.0829
35	T	0	2940	1	1.12734
35	W	222	2659	0.88763	0.996063
35	Y	556	2418	0.741477	0.825323
36	*	2143	142	0.0418703	0.0080261
36	A	426	5216	0.889808	0.998607
36	C	986	8202	0.845823	0.947223
36	D	5915	564	0.0591636	0.0282285
36	E	6189	760	0.0749185	0.0466338
36	F	10659	212	0.0129472	-0.0257626
36	G	12639	564	0.0285881	-0.00749049
36	H	13781	1265	0.0570821	0.0257968
36	I	204	2903	0.903707	1.01484
36	K	6754	120	0.0115818	-0.0273577
36	L	115	3724	0.95527	1.07508
36	M	213	962	0.748655	0.833709
36	N	2655	0	0	-0.0408879
36	P	4474	275	0.0389579	0.00462368
36	Q	7986	300	0.0241757	-0.0126452
36	R	6691	692	0.0638522	0.0337058
36	S	6444	849	0.0799434	0.052504
36	T	182	3810	0.93246	1.04843
36	W	3355	0	0	-0.0408879
36	Y	7096	468	0.0416829	0.00780709
37	*	1852	141	0.0478099	0.0149648
37	A	0	4197	1	1.12734
37	C	0	721	1	1.12734
37	D	589	3168	0.780085	0.870426
37	E	0	2575	1	1.12734
37	F	0	2500	1	1.12734
37	G	368	1047	0.652338	0.721189
37	H	0	1558	1	1.12734
37	I	0	1628	1	1.12734
37	K	471	2057	0.742284	0.826267
37	L	155	1501	0.864618	0.96918
37	M	0	1769	1	1.12734
37	N	19	2488	0.988553	1.11396
37	P	1695	0	0	-0.0408879
37	Q	100	832	0.845847	0.947251
37	R	12	2685	0.993269	1.11947
37	S	404	1308	0.681043	0.754723
37	T	0	2584	1	1.12734
37	V	0	1549	1	1.12734
37	W	297	2328	0.83791	0.937979
38	*	3760	248	0.0416858	0.00781048
38	A	83	751	0.856472	0.959664
38	D	980	79	0.0504802	0.0180844
38	E	2455	252	0.0634041	0.0331824
38	F	265	1475	0.785904	0.877225
38	G	210	1143	0.782115	0.872798
38	H	81	296	0.706748	0.784752
38	I	862	3042	0.699464	0.776243
38	K	3720	223	0.0380311	0.00354102
38	L	0	1772	1	1.12734
38	M	188	1375	0.828282	0.926731
38	N	414	1544	0.710949	0.78966
38	Q	188	1518	0.8419	0.942641
38	R	944	0	0	-0.0408879
38	V	0	2560	1	1.12734
38	W	3768	383	0.0628239	0.0325046
38	Y	602	0	0	-0.0408879
39	*	2735	741	0.151594	0.136207
39	A	0	1567	1	1.12734
39	C	0	2170	1	1.12734
39	D	7969	621	0.0488809	0.0162159
39	E	3203	225	0.0442766	0.0108371
39	F	5995	571	0.0591024	0.028157
39	G	2255	863	0.20153	0.194544
39	H	8955	473	0.0336621	-0.00156302
39	I	4649	158	0.0219223	-0.0152776
39	K	2975	154	0.0330119	-0.00232251
39	L	14753	1152	0.0489756	0.0163266
39	M	6301	523	0.0518994	0.0197423
39	N	201	879	0.742539	0.826565
39	Q	4135	10	0.00159239	-0.0390276
39	R	9882	808	0.051165	0.0188844
39	S	2574	3005	0.435006	0.467297
39	T	433	2260	0.774887	0.864353
39	V	441	4175	0.861947	0.966059
39	W	4474	0	0	-0.0408879
39	Y	7807	309	0.025439	-0.0111694
40	*	12120	684	0.0358838	0.00103252
40	A	10986	617	0.0357163	0.000836799
40	C	23572	1386	0.0373302	0.00272219
40	D	14153	836	0.0374953	0.00291506
40	E	10957	1700	0.0928249	0.0675524
40	F	11693	1499	0.077955	0.0501811
40	G	21304	1185	0.0353856	0.000450507
40	H	19651	418	0.0138343	-0.0247263
40	I	10452	333	0.0205793	-0.0168466
40	K	13010	428	0.0212354	-0.0160801
40	L	13437	667	0.0316993	-0.00385595
40	M	9952	630	0.0400759	0.00592977
40	N	14425	1507	0.064458	0.0344135
40	P	7144	164	0.0149139	-0.023465
40	Q	9510	735	0.0484989	0.0157698
40	S	14413	569	0.0253753	-0.0112438
40	T	10247	758	0.046516	0.0134532
40	V	19817	837	0.0271002	-0.00922879
40	W	17340	422	0.0157966	-0.0224339
40	Y	8141	545	0.0422836	0.00850885
41	*	7723	173	0.0145582	-0.0238806
41	A	14096	464	0.0212477	-0.0160658
41	C	15427	412	0.0173081	-0.0206681
41	D	18617	1028	0.035137	0.000160088
41	E	16531	967	0.0371453	0.00250622
41	F	14009	707	0.0322113	-0.00325777
41	G	13473	845	0.0397197	0.00551372
41	I	15403	1272	0.0516496	0.0194504
41	K	7647	696	0.0566263	0.0252643
41	L	8396	1055	0.0765279	0.0485139
41	M	14641	834	0.0362072	0.00141029
41	N	17647	558	0.0204275	-0.0170239
41	P	14272	867	0.0385204	0.00411258
41	Q	11221	159	0.00925853	-0.0300718
41	R	7293	356	0.0311888	-0.00445231
41	S	10368	264	0.0165155	-0.021594
41	T	9511	848	0.0555356	0.0239902
41	V	5572	1253	0.129151	0.10999
41	W	18139	878	0.030935	-0.00474883
41	Y	17210	1332	0.0485645	0.0158464
42	*	10956	317	0.0187247	-0.0190132
42	A	1137	7172	0.806202	0.900937
42	C	572	10428	0.923214	1.03763
42	D	17516	2231	0.077491	0.049639
42	E	5869	1628	0.154648	0.139776
42	F	5837	7461	0.457404	0.493463
42	G	421	6598	0.911784	1.02428
42	H	12274	956	0.0488577	0.0161889
42	I	484	3960	0.84365	0.944685
42	K	7785	393	0.0322201	-0.00324757
42	L	669	5766	0.850392	0.952561
42	M	1174	6897	0.794848	0.887673
42	N	3083	5584	0.544316	0.594996
42	P	18420	835	0.0290282	-0.00697645
42	Q	11341	2165	0.111821	0.0897441
42	R	10810	1190	0.0676861	0.0381847
42	S	185	6375	0.957852	1.0781
42	T	846	9322	0.879037	0.986025
42	W	15897	1097	0.0435291	0.00996386
42	Y	7298	426	0.0370695	0.00241764
43	*	20471	1039	0.0323887	-0.00305059
43	A	728	5457	0.83175	0.930783
43	C	216	5142	0.940119	1.05738
43	D	11698	2224	0.111414	0.0892684
43	E	2421	9560	0.722548	0.80321
43	F	910	7517	0.844908	0.946154
43	G	901	8287	0.858473	0.962002
43	H	527	962	0.546253	0.597258
43	K	2824	3613	0.45763	0.493727
43	L	903	15162	0.917174	1.03058
43	M	378	6296	0.91656	1.02986
43	N	958	9809	0.871012	0.97665
43	P	5834	1268	0.12537	0.105572
43	Q	369	7905	0.933899	1.05012
43	R	2774	4563	0.520344	0.56699
43	S	40	7794	0.992278	1.11832
43	T	490	7714	0.912145	1.0247
43	V	1514	6001	0.723302	0.804091
43	W	5159	8065	0.50763	0.552137
43	Y	667	5242	0.838268	0.938397
44	*	17552	669	0.0245207	-0.0122421
44	A	737	4893	0.814074	0.910133
44	D	7155	7978	0.423751	0.454148
44	E	13977	4649	0.179899	0.169275
44	F	1624	6394	0.721959	0.802522
44	G	188	4841	0.944389	1.06237
44	H	3408	5960	0.535608	0.584823
44	I	1161	6351	0.78297	0.873797
44	K	9451	6539	0.313328	0.325149
44	L	1171	8067	0.819602	0.916591
44	M	370	8295	0.93665	1.05333
44	N	330	2710	0.844137	0.945254
44	P	1658	7875	0.758012	0.84464
44	Q	2429	3579	0.492834	0.534853
44	R	4881	1715	0.18813	0.17889
44	S	0	3256	1	1.12734
44	T	203	3931	0.927383	1.0425
44	V	491	4250	0.850936	0.953196
44	W	1972	5043	0.627775	0.692494
44	Y	4504	2986	0.304216	0.314505
45	*	15694	978	0.0394757	0.0052286
45	A	943	8533	0.85648	0.959673
45	C	882	8206	0.859864	0.963626
45	D	194	6624	0.95748	1.07766
45	E	1312	8077	0.802374	0.896465
45	F	124	4449	0.959452	1.07997
45	G	680	4866	0.825154	0.923077
45	H	220	6017	0.947472	1.06597
45	I	1313	9593	0.828132	0.926557
45	K	432	4431	0.871208	0.976879
45	L	880	6843	0.836825	0.936711
45	M	181	2590	0.904188	1.01541
45	N	464	7477	0.913996	1.02686
45	P	623	9774	0.911868	1.02438
45	Q	699	9263	0.897326	1.00739
45	R	720	7105	0.866809	0.971739
45	S	423	4186	0.867135	0.97212
45	V	547	8091	0.907021	1.01872
45	W	776	10863	0.902269	1.01316
45	Y	260	5247	0.930115	1.0457
46	*	14541	1266	0.0543011	0.022548
46	C	70	3667	0.971869	1.09447
46	D	379	4513	0.887045	0.99538
46	E	575	4697	0.843439	0.944438
46	F	126	4265	0.957125	1.07725
46	G	910	3627	0.724411	0.805386
46	H	601	7057	0.885635	0.993732
46	I	0	1833	1	1.12734
46	K	450	5925	0.896731	1.0067
46	L	0	5789	1	1.12734
46	M	846	7105	0.847065	0.948674
46	N	205	3880	0.925829	1.04069
46	P	245	3134	0.894026	1.00353
46	Q	730	6747	0.859064	0.962692
46	R	460	5294	0.883586	0.991338
46	T	491	3237	0.81301	0.90889
46	V	1207	5241	0.741179	0.824975
46	W	34	5720	0.991068	1.1169
46	Y	197	5276	0.946417	1.06474
47	*	7071	183	0.0167817	-0.021283
47	A	0	1576	1	1.12734
47	C	548	4124	0.832302	0.931428
47	D	108	1344	0.891389	1.00045
47	F	309	6265	0.930418	1.04605
47	G	209	4089	0.928072	1.04331
47	H	417	4033	0.864468	0.969005
47	I	186	1332	0.825263	0.923204
47	K	108	7633	0.978996	1.1028
47	L	389	3799	0.865605	0.970333
47	M	507	7831	0.910607	1.0229
47	N	0	1808	1	1.12734
47	P	537	6947	0.895088	1.00478
47	Q	463	4731	0.870782	0.976381
47	R	405	5270	0.895634	1.00541
47	S	579	6548	0.881774	0.989222
47	T	560	5134	0.85808	0.961542
47	V	362	4950	0.90018	1.01072
47	W	139	2578	0.924423	1.03905
47	Y	281	911	0.681336	0.755065
48	*	3405	316	0.0576749	0.0264894
48	A	0	2091	1	1.12734
48	C	49	2022	0.964557	1.08593
48	E	0	771	1	1.12734
48	F	773	3732	0.760996	0.848127
48	G	0	620	1	1.12734
48	H	110	1639	0.907635	1.01943
48	I	365	2761	0.83302	0.932266
48	K	0	1283	1	1.12734
48	L	303	3582	0.886318	0.994531
48	M	235	2891	0.89027	0.999147
48	N	194	3159	0.914814	1.02782
48	P	0	1647	1	1.12734
48	Q	93	3046	0.955753	1.07565
48	R	171	2166	0.89309	1.00244
48	S	0	1144	1	1.12734
48	T	212	3000	0.903219	1.01427
48	V	345	1528	0.744958	0.82939
48	W	0	763	1	1.12734
48	Y	166	1785	0.876416	0.982962
49	*	10847	690	0.0402631	0.00614853
49	A	500	4624	0.859137	0.962776
49	C	275	8701	0.954268	1.07391
49	D	1285	5949	0.753282	0.839115
49	E	105	6794	0.977103	1.10059
49	F	69	3772	0.973011	1.09581
49	G	515	5455	0.874775	0.981045
49	H	768	8306	0.877038	0.983689
49	I	1350	10269	0.833793	0.93317
49	K	629	3352	0.778494	0.868568
49	L	0	2362	1	1.12734
49	N	219	6132	0.948629	1.06732
49	P	575	1386	0.613853	0.67623
49	Q	541	6350	0.885596	0.993686
49	R	1322	7946	0.798549	0.891997
49	S	331	4098	0.89089	0.999872
49	T	0	6565	1	1.12734
49	V	0	9382	1	1.12734
49	W	277	9682	0.958423	1.07876
49	Y	649	8213	0.893001	1.00234
50	*	13495	925	0.0432497	0.00963755
50	A	178	2449	0.900732	1.01137
50	C	340	4940	0.905501	1.01694
50	D	825	9381	0.882341	0.989884
50	E	586	4249	0.827048	0.92529
50	F	817	6395	0.83772	0.937757
50	G	521	5087	0.865579	0.970303
50	H	404	5641	0.902043	1.0129
50	I	195	8848	0.967663	1.08956
50	K	812	5150	0.807054	0.901932
50	M	544	3905	0.825605	0.923604
50	N	371	3830	0.871932	0.977724
50	P	160	5483	0.957628	1.07784
50	Q	231	4238	0.923661	1.03816
50	R	376	6948	0.924166	1.03875
50	S	474	8347	0.920721	1.03472
50	T	494	10009	0.930373	1.046
50	V	491	8440	0.918939	1.03264
50	W	7	5448	0.998056	1.12506
50	Y	392	8838	0.936984	1.05372
51	*	22301	1150	0.0328901	-0.00246482
51	A	68	1157	0.918175	1.03175
51	C	575	3666	0.807868	0.902883
51	D	478	7721	0.914183	1.02708
51	E	237	4658	0.928376	1.04366
51	F	620	9688	0.911546	1.024
51	G	571	6149	0.876575	0.983148
51	H	204	4665	0.937816	1.05469
51	I	28	8395	0.994968	1.12146
51	K	775	9775	0.892684	1.00197
51	L	505	7525	0.90764	1.01944
51	M	402	5775	0.904527	1.0158
51	P	10935	5890	0.262119	0.265326
51	Q	761	7418	0.865386	0.970077
51	R	551	5638	0.870938	0.976563
51	S	878	9503	0.877121	0.983786
51	T	678	9409	0.9015	1.01227
51	V	1435	8402	0.794299	0.887031
51	W	852	8482	0.867823	0.972924
51	Y	662	8046	0.889082	0.997759
52	*	13161	1001	0.0477645	0.0149118
52	A	1044	9898	0.862119	0.966261
52	C	394	4507	0.88296	0.990608
52	D	157	8086	0.971401	1.09393
52	E	236	8772	0.960805	1.08155
52	F	1680	7872	0.755515	0.841724
52	G	513	8993	0.92039	1.03433
52	H	116	6937	0.975272	1.09845
52	I	401	8310	0.93182	1.04769
52	K	448	5653	0.892725	1.00201
52	L	577	8426	0.905934	1.01745
52	M	363	6108	0.917335	1.03077
52	N	1655	12232	0.829768	0.928467
52	Q	1003	8100	0.841922	0.942666
52	R	1082	4530	0.734123	0.816732
52	S	4	3789	0.998402	1.12547
52	T	968	6440	0.814388	0.910501
52	V	338	4870	0.904783	1.0161
52	W	1509	12939	0.849736	0.951794
52	Y	1021	7437	0.8277	0.926052
53	*	6294	902	0.0863524	0.0599912
53	A	161	1462	0.856913	0.960179
53	C	187	6847	0.960235	1.08088
53	D	982	7615	0.836445	0.936268
53	E	0	5012	1	1.12734
53	F	131	11006	0.982272	1.10663
53	G	998	9244	0.859326	0.962998
53	H	611	7124	0.884919	0.992896
53	I	373	7062	0.925851	1.04071
53	K	0	6497	1	1.12734
53	L	193	6559	0.957288	1.07744
53	M	202	2614	0.895116	1.00481
53	P	1282	6134	0.759357	0.846211
53	Q	503	4011	0.840229	0.940688
53	R	205	3961	0.927235	1.04233
53	S	846	8903	0.874061	0.980212
53	T	471	7718	0.915304	1.02839
53	V	300	5405	0.922372	1.03665
53	W	1006	7209	0.825358	0.923315
53	Y	181	3704	0.931016	1.04675
54	*	10437	1050	0.0622201	0.0317992
54	A	9881	2666	0.151061	0.135585
54	C	6983	7361	0.4101	0.438201
54	D	12119	3065	0.14295	0.12611
54	E	10705	4974	0.234557	0.233127
54	F	300	9363	0.953667	1.07321
54	G	6502	2691	0.214423	0.209606
54	H	464	10961	0.939684	1.05687
54	I	5007	7345	0.491729	0.533562
54	K	8234	3852	0.235781	0.234557
54	L	5201	8349	0.514251	0.559873
54	M	980	9427	0.863835	0.968265
54	N	9060	3002	0.179335	0.168615
54	P	3816	2572	0.307722	0.318601
54	Q	11621	4352	0.198062	0.190493
54	R	13064	1456	0.0684697	0.0391001
54	S	4821	766	0.0948482	0.0699161
54	T	8200	3485	0.218926	0.214867
54	V	6131	6302	0.404016	0.431093
54	W	490	9585	0.928061	1.0433
55	*	15656	927	0.0375819	0.00301624
55	A	697	9658	0.901365	1.01211
55	C	85	6397	0.98025	1.10426
55	D	663	10637	0.913651	1.02646
55	F	389	8697	0.936487	1.05314
55	G	466	5399	0.884271	0.992139
55	H	697	6968	0.868302	0.973484
55	I	189	8947	0.968963	1.09108
55	K	559	2763	0.765245	0.85309
55	L	373	6580	0.920849	1.03487
55	M	810	4609	0.789591	0.881531
55	N	433	5471	0.892852	1.00216
55	P	214	6029	0.948928	1.06767
55	Q	1006	9303	0.85913	0.962769
55	R	934	5100	0.782662	0.873437
55	S	161	7185	0.96714	1.08895
55	T	1348	8761	0.810831	0.906344
55	V	1537	12023	0.837633	0.937655
55	W	848	6633	0.837625	0.937646
55	Y	817	10398	0.893544	1.00297
56	*	14065	1776	0.0768741	0.0489184
56	A	1	8383	0.999819	1.12713
56	C	1033	8754	0.848228	0.950033
56	E	523	7418	0.90342	1.01451
56	F	0	6495	1	1.12734
56	G	166	5650	0.95735	1.07751
56	H	340	8682	0.943948	1.06186
56	I	409	7295	0.921649	1.0358
56	K	397	5534	0.901895	1.01273
56	L	797	7633	0.863316	0.967659
56	M	295	2849	0.8643	0.968809
56	N	60	6394	0.985971	1.11095
56	P	1173	7385	0.805905	0.90059
56	Q	602	7949	0.896995	1.007
56	R	1126	5954	0.777148	0.866995
56	S	959	7716	0.841428	0.942089
56	T	323	2596	0.841283	0.941919
56	V	1875	9687	0.773101	0.862268
56	W	0	3508	1	1.12734
56	Y	551	8051	0.905983	1.0175
57	*	15866	657	0.0265835	-0.00983232
57	A	1903	13329	0.822041	0.919441
57	C	231	8642	0.961048	1.08183
57	D	132	11288	0.982578	1.10698
57	E	405	4991	0.890439	0.999345
57	F	800	10502	0.896455	1.00637
57	G	960	8974	0.860432	0.96429
57	H	1229	4962	0.726977	0.808384
57	I	377	8613	0.937761	1.05463
57	K	30	5743	0.992141	1.11816
57	M	1309	11589	0.853775	0.956513
57	N	871	4702	0.780714	0.871161
57	P	928	2331	0.623575	0.687588
57	Q	1100	6450	0.794538	0.887311
57	R	1129	8423	0.831089	0.93001
57	S	98	4876	0.970426	1.09279
57	T	1622	6146	0.7142	0.793458
57	V	594	6041	0.87025	0.97576
57	W	1194	14977	0.892154	1.00135
57	Y	247	6397	0.944691	1.06272
58	*	14377	832	0.0367625	0.00205894
58	A	603	5937	0.866548	0.971434
58	C	648	8104	0.891867	1.00101
58	D	674	7032	0.873108	0.979099
58	E	441	5344	0.888787	0.997415
58	F	809	5484	0.817204	0.91379
58	G	1347	12341	0.858	0.961449
58	H	319	3918	0.890111	0.998961
58	I	101	7301	0.979455	1.10334
58	K	1032	10090	0.865736	0.970486
58	M	444	9117	0.931234	1.047
58	N	622	6365	0.870947	0.976574
58	P	1474	4588	0.67243	0.744661
58	Q	698	6481	0.85962	0.963342
58	R	145	7265	0.970626	1.09302
58	S	260	5612	0.934362	1.05066
58	T	706	8206	0.8846	0.992524
58	V	522	7205	0.901018	1.0117
58	W	1007	12610	0.891991	1.00116
58	Y	945	9466	0.868528	0.973748
59	*	16167	1130	0.044065	0.0105899
59	A	0	3220	1	1.12734
59	C	45	14054	0.995168	1.12169
59	D	211	5774	0.947499	1.066
59	E	1968	11734	0.797251	0.89048
59	F	198	1601	0.842088	0.94286
59	G	2161	11889	0.783939	0.874929
59	H	214	2374	0.879752	0.98686
59	K	0	5680	1	1.12734
59	L	2007	12056	0.798453	0.891884
59	M	377	8834	0.939223	1.05634
59	N	785	5834	0.830546	0.929377
59	P	271	4807	0.921249	1.03534
59	Q	321	4530	0.902978	1.01399
59	R	370	6176	0.916725	1.03005
59	S	516	5587	0.877161	0.983834
59	T	126	7224	0.974234	1.09724
59	V	893	12631	0.903179	1.01423
59	W	222	8604	0.96235	1.08335
59	Y	1254	9227	0.829137	0.92773
60	*	10411	592	0.0361457	0.00133844
60	A	143	5913	0.964627	1.08601
60	C	0	2304	1	1.12734
60	D	629	9626	0.909851	1.02202
60	E	120	6662	0.973414	1.09628
60	F	795	11636	0.906128	1.01767
60	G	48	3014	0.976421	1.09979
60	H	474	5889	0.89123	1.00027
60	I	0	4431	1	1.12734
60	K	395	3094	0.837816	0.937869
60	L	542	5897	0.877682	0.984442
60	M	1152	11994	0.872877	0.978828
60	N	1660	6977	0.734881	0.817618
60	P	548	9793	0.921787	1.03597
60	Q	487	4891	0.868826	0.974096
60	S	1769	12807	0.826827	0.925032
60	T	0	5661	1	1.12734
60	V	457	11065	0.941066	1.05849
60	W	998	9345	0.860635	0.964527
60	Y	428	5303	0.890965	0.999959
61	*	16331	854	0.0333377	-0.00194191
61	A	1286	12467	0.864746	0.969329
61	C	803	9040	0.881299	0.988667
61	D	457	10340	0.937193	1.05396
61	E	0	5436	1	1.12734
61	F	258	6009	0.938876	1.05593
61	G	240	8888	0.960666	1.08139
61	H	344	7943	0.938378	1.05535
61	I	420	8331	0.928986	1.04438
61	L	1045	11002	0.874109	0.980268
61	M	462	9069	0.928295	1.04357
61	N	1034	10505	0.870134	0.975624
61	P	1760	14416	0.843797	0.944856
61	Q	336	9721	0.9502	1.06916
61	R	1360	7010	0.772693	0.861791
61	S	884	7241	0.843801	0.944861
61	T	194	6463	0.956467	1.07648
61	V	768	7826	0.870473	0.97602
61	W	449	6553	0.905884	1.01739
61	Y	197	6168	0.953808	1.07337
62	*	15967	1084	0.0428548	0.00917621
62	A	183	6667	0.960043	1.08066
62	C	559	8650	0.910756	1.02308
62	D	187	3960	0.933182	1.04928
62	E	91	4776	0.97192	1.09453
62	F	119	5352	0.967385	1.08924
62	G	77	5684	0.979872	1.10382
62	H	436	5605	0.894495	1.00408
62	I	424	4981	0.885683	0.993788
62	K	582	9357	0.913816	1.02665
62	L	485	4596	0.862062	0.966194
62	M	163	3623	0.936138	1.05273
62	N	468	6898	0.906722	1.01837
62	P	534	5621	0.874088	0.980243
62	Q	882	6327	0.825508	0.92349
62	R	601	4084	0.81757	0.914217
62	T	398	6955	0.920158	1.03406
62	V	840	6905	0.844267	0.945406
62	W	597	8492	0.903671	1.0148
62	Y	827	7632	0.858881	0.962478
63	*	11352	341	0.0194258	-0.0181942
63	A	570	8822	0.910772	1.0231
63	C	1262	14302	0.881992	0.989477
63	D	884	2375	0.63923	0.705877
63	E	1297	14243	0.878675	0.985602
63	F	0	3333	1	1.12734
63	G	1769	9637	0.782267	0.872975
63	H	704	7551	0.876141	0.982642
63	I	678	6695	0.866886	0.971829
63	K	491	6685	0.899791	1.01027
63	L	850	4721	0.785544	0.876803
63	M	656	12365	0.925545	1.04036
63	P	1203	10254	0.848974	0.950905
63	Q	1095	6202	0.788823	0.880635
63	R	826	10455	0.89302	1.00236
63	S	210	9726	0.968299	1.0903
63	T	360	8742	0.941228	1.05868
63	V	264	9406	0.959179	1.07965
63	W	1056	12230	0.884232	0.992094
63	Y	487	7132	0.906176	1.01773
64	*	12852	397	0.0199654	-0.0175638
64	A	1129	14363	0.893505	1.00293
64	C	526	9566	0.923041	1.03743
64	D	396	5300	0.898236	1.00845
64	E	689	5727	0.845722	0.947105
64	F	457	8116	0.921336	1.03544
64	G	816	10489	0.894485	1.00407
64	I	423	7795	0.923973	1.03852
64	K	1121	7658	0.818358	0.915137
64	L	0	1534	1	1.12734
64	M	651	6155	0.86179	0.965877
64	N	309	6399	0.931775	1.04763
64	P	333	5050	0.909103	1.02115
64	Q	158	7810	0.970238	1.09257
64	R	1564	5477	0.697842	0.774348
64	S	591	7575	0.894214	1.00375
64	T	795	4373	0.783909	0.874893
64	V	795	5934	0.831156	0.930089
64	W	262	5685	0.934684	1.05103
64	Y	438	3107	0.823889	0.9216
65	*	10443	889	0.0531582	0.0212128
65	A	600	10099	0.917359	1.03079
65	C	325	7043	0.934606	1.05094
65	D	529	7870	0.907506	1.01928
65	E	1147	5962	0.774166	0.863512
65	F	176	4282	0.941333	1.0588
65	G	305	5274	0.919381	1.03316
65	H	589	3730	0.806818	0.901657
65	I	199	5190	0.945055	1.06315
65	K	1006	6787	0.816492	0.912958
65	L	642	7307	0.882439	0.989998
65	M	216	2761	0.893956	1.00345
65	P	506	5823	0.883579	0.99133
65	Q	199	5402	0.947097	1.06553
65	R	1106	7299	0.813166	0.909073
65	S	505	5092	0.869279	0.974625
65	T	1959	7114	0.705444	0.783229
65	V	780	5969	0.834625	0.934142
65	W	1021	9361	0.858088	0.961551
65	Y	0	3940	1	1.12734
66	*	17783	647	0.0234324	-0.0135135
66	A	7088	2460	0.186258	0.176703
66	C	716	8169	0.88269	0.990292
66	D	13424	600	0.0286331	-0.00743794
66	E	16184	2394	0.0888848	0.0629496
66	G	13267	646	0.0311135	-0.00454031
66	H	13951	2159	0.0926099	0.0673013
66	I	222	6472	0.95056	1.06958
66	K	22686	1137	0.031996	-0.00350934
66	L	388	10100	0.944956	1.06303
66	M	854	8790	0.871599	0.977335
66	N	14610	1082	0.0465675	0.0135135
66	P	7130	2935	0.213514	0.208544
66	Q	7950	141	0.0115616	-0.0273813
66	R	3571	574	0.0958473	0.0710833
66	S	12745	486	0.0245316	-0.0122295
66	T	339	4126	0.889219	0.99792
66	V	235	7705	0.955798	1.0757
66	W	898	8750	0.86534	0.970023
66	Y	807	11089	0.900618	1.01124
67	*	15276	283	0.0120703	-0.026787
67	A	584	6202	0.87506	0.981378
67	C	596	9495	0.913094	1.02581
67	D	317	3479	0.87861	0.985525
67	E	490	7937	0.914403	1.02734
67	F	403	6502	0.914092	1.02698
67	G	418	5456	0.895923	1.00575
67	H	883	6958	0.838628	0.938817
67	I	517	3560	0.819535	0.916513
67	K	1804	10311	0.790333	0.882398
67	M	0	7181	1	1.12734
67	N	547	7909	0.905084	1.01645
67	P	472	1891	0.725441	0.80659
67	Q	631	9239	0.906159	1.01771
67	R	196	8160	0.964859	1.08628
67	S	280	8874	0.954341	1.074
67	T	0	5432	1	1.12734
67	V	497	9362	0.925501	1.04031
67	W	589	10433	0.921147	1.03522
67	Y	337	7750	0.938144	1.05507
68	*	8451	620	0.0461508	0.0130267
68	A	420	5959	0.903448	1.01454
68	C	794	5909	0.83074	0.929602
68	D	22537	1444	0.0405427	0.00647513
68	E	19242	592	0.0198868	-0.0176557
68	F	9760	682	0.0440539	0.0105769
68	G	18288	2257	0.0752659	0.0470396
68	H	18944	1284	0.0427876	0.00909764
68	I	784	5881	0.831851	0.930901
68	K	10828	544	0.0320708	-0.00342192
68	L	495	8498	0.918845	1.03253
68	M	778	5156	0.813804	0.909818
68	N	20790	1061	0.0325612	-0.00284906
68	P	751	10319	0.900614	1.01123
68	Q	11732	424	0.0232798	-0.0136918
68	R	20868	947	0.0290588	-0.00694062
68	S	3514	5989	0.529192	0.577327
68	T	616	5953	0.864377	0.968899
68	W	9260	712	0.0482617	0.0154926
68	Y	26090	1369	0.033448	-0.00181304
69	*	22550	550	0.0158308	-0.022394
69	A	1552	6120	0.72227	0.802885
69	C	560	6296	0.88116	0.988505
69	D	642	8139	0.893172	1.00254
69	E	102	5741	0.973767	1.09669
69	F	239	6584	0.94783	1.06639
69	G	622	9892	0.912956	1.02565
69	H	534	3843	0.825972	0.924032
69	I	789	7412	0.861024	0.964981
69	K	0	3347	1	1.12734
69	L	314	4112	0.896228	1.00611
69	M	336	7339	0.935086	1.0515
69	N	459	11084	0.940918	1.05832
69	P	2571	5456	0.583255	0.640485
69	R	639	10589	0.916169	1.0294
69	S	1085	11293	0.872843	0.978788
69	T	0	5584	1	1.12734
69	V	221	2439	0.879204	0.986219
69	W	195	10680	0.973061	1.09587
69	Y	0	5021	1	1.12734
70	*	6322	508	0.0503268	0.0179052
70	C	1146	3266	0.65272	0.721636
70	D	849	5836	0.819279	0.916214
70	E	1078	9555	0.85392	0.956683
70	F	196	6458	0.956005	1.07594
70	G	106	5489	0.971551	1.0941
70	H	409	5660	0.90125	1.01197
70	I	318	5511	0.919545	1.03335
70	K	472	5600	0.88668	0.994954
70	L	523	8436	0.914073	1.02695
70	M	759	6907	0.857175	0.960484
70	N	320	3175	0.867435	0.972471
70	P	596	7029	0.886078	0.99425
70	Q	1885	15591	0.845076	0.946351
70	R	12	6894	0.997368	1.12426
70	S	645	4401	0.81818	0.91493
70	T	708	6425	0.856834	0.960086
70	V	937	11904	0.893374	1.00277
70	W	284	6489	0.937767	1.05463
70	Y	1294	8740	0.816663	0.913158
71	*	7475	644	0.0537638	0.0219204
71	A	596	6531	0.878447	0.985335
71	C	99	6084	0.975921	1.09921
71	D	815	9133	0.880817	0.988104
71	E	0	4359	1	1.12734
71	F	286	8342	0.950584	1.06961
71	H	372	6658	0.921897	1.0361
71	I	1193	5041	0.735919	0.81883
71	K	515	8532	0.916149	1.02938
71	L	598	9983	0.916734	1.03006
71	M	726	4622	0.807642	0.902619
71	N	1323	7954	0.79859	0.892044
71	P	359	7979	0.936134	1.05273
71	Q	664	8105	0.889504	0.998252
71	R	700	4739	0.817012	0.913565
71	S	480	9944	0.9318	1.04766
71	T	444	6651	0.908081	1.01995
71	V	300	6562	0.935172	1.0516
71	W	563	10183	0.922651	1.03698
71	Y	627	6911	0.87907	0.986063
72	*	15526	368	0.015391	-0.0229077
72	A	950	6822	0.82566	0.923668
72	C	770	7499	0.865281	0.969955
72	D	194	3983	0.931225	1.04699
72	E	240	6147	0.944108	1.06204
72	F	0	4529	1	1.12734
72	G	357	5825	0.914972	1.028
72	H	414	6297	0.909347	1.02143
72	I	600	6704	0.880509	0.987744
72	K	566	7845	0.90139	1.01214
72	L	554	9949	0.922141	1.03638
72	M	344	8368	0.941324	1.05879
72	P	305	6796	0.936285	1.0529
72	Q	434	4247	0.865838	0.970606
72	R	478	9850	0.931461	1.04727
72	S	1293	9485	0.828705	0.927225
72	T	331	8344	0.943262	1.06105
72	V	89	8821	0.984932	1.10973
72	W	1505	6054	0.726245	0.80753
72	Y	651	6371	0.865848	0.970616
73	*	10412	284	0.0176708	-0.0202443
73	A	1065	10742	0.869315	0.974667
73	C	542	10415	0.926863	1.0419
73	D	1317	12073	0.858069	0.961529
73	E	415	1854	0.746598	0.831307
73	F	422	8421	0.92938	1.04484
73	G	418	6883	0.915681	1.02883
73	H	387	7400	0.926528	1.0415
73	I	259	4638	0.921936	1.03614
73	K	957	5354	0.786763	0.878228
73	L	993	8196	0.844802	0.94603
73	M	183	5940	0.955371	1.0752
73	N	993	4185	0.735413	0.818239
73	P	854	10546	0.890641	0.99958
73	Q	336	5305	0.912378	1.02497
73	R	699	5794	0.845359	0.946681
73	S	923	5563	0.79899	0.892512
73	T	338	5393	0.913215	1.02595
73	W	363	3137	0.850731	0.952957
73	Y	417	6026	0.905036	1.0164
74	*	18467	533	0.0186792	-0.0190664
74	A	401	2980	0.830538	0.929367
74	C	613	6986	0.882573	0.990156
74	D	310	5705	0.923879	1.03841
74	E	224	12857	0.974262	1.09727
74	F	1014	9391	0.859311	0.96298
74	G	720	12896	0.921951	1.03616
74	H	737	5254	0.824608	0.92244
74	I	1307	8768	0.815643	0.911966
74	K	458	6284	0.900485	1.01108
74	L	0	3632	1	1.12734
74	M	1202	11879	0.86698	0.971939
74	N	381	6021	0.912451	1.02506
74	P	226	1923	0.848751	0.950643
74	R	544	8642	0.912868	1.02555
74	S	201	10852	0.972682	1.09542
74	T	412	3970	0.864036	0.9685
74	V	1120	9157	0.843555	0.944573
74	W	916	10805	0.886097	0.994272
74	Y	107	3169	0.951296	1.07044
75	*	9682	424	0.0280706	-0.0080951
75	A	144	9822	0.978253	1.10193
75	C	1080	11253	0.872962	0.978927
75	D	6342	2112	0.180077	0.169482
75	E	1900	16505	0.851389	0.953726
75	F	1353	7803	0.791817	0.884132
75	G	486	5834	0.887851	0.996322
75	H	773	9498	0.890151	0.999008
75	I	6	9287	0.999021	1.12619
75	K	0	2388	1	1.12734
75	M	476	7033	0.906927	1.01861
75	N	721	9961	0.901101	1.0118
75	P	533	5756	0.87688	0.983504
75	Q	214	7520	0.958635	1.07901
75	R	219	9379	0.965805	1.08739
75	S	459	12886	0.948757	1.06747
75	T	499	9397	0.925482	1.04028
75	V	800	9422	0.88594	0.994088
75	W	950	8923	0.861004	0.964958
75	Y	1251	6931	0.785126	0.876315
76	*	19285	1099	0.0362219	0.00142745
76	A	1008	6537	0.810497	0.905954
76	C	674	7353	0.877972	0.98478
76	D	884	11302	0.893975	1.00348
76	E	544	9892	0.923031	1.03742
76	F	540	4565	0.847914	0.949666
76	G	186	3650	0.928273	1.04354
76	H	0	2808	1	1.12734
76	I	1010	5250	0.77417	0.863516
76	K	400	5058	0.892927	1.00225
76	L	0	8915	1	1.12734
76	M	409	4441	0.877466	0.984189
76	N	819	8980	0.878511	0.98541
76	P	591	7815	0.897128	1.00716
76	Q	227	4521	0.929253	1.04469
76	S	1056	4323	0.729718	0.811586
76	T	426	7716	0.922752	1.03709
76	V	1159	9589	0.845115	0.946396
76	W	402	9093	0.937176	1.05394
76	Y	621	5793	0.860182	0.963998
77	*	12202	800	0.0414468	0.00753133
77	A	1252	10479	0.846624	0.948158
77	C	551	3243	0.795149	0.888025
77	D	626	5708	0.857417	0.960768
77	E	1098	13327	0.888947	0.997602
77	F	165	10291	0.976266	1.09961
77	G	509	5078	0.868065	0.973206
77	H	1316	6555	0.766627	0.854704
77	I	583	2456	0.735329	0.818142
77	K	831	9021	0.87744	0.984159
77	L	1278	11988	0.860847	0.964774
77	M	256	8369	0.955674	1.07555
77	N	212	7502	0.958911	1.07934
77	P	290	5791	0.929426	1.04489
77	Q	614	9005	0.9063	1.01787
77	R	1094	632	0.275883	0.281405
77	S	714	7542	0.874472	0.980691
77	T	261	5575	0.933718	1.0499
77	W	1131	5809	0.77207	0.861063
77	Y	1518	13513	0.854456	0.957309
78	*	13590	446	0.0211852	-0.0161388
78	A	201	2177	0.877195	0.983872
78	C	1192	8657	0.827279	0.92556
78	D	936	7293	0.837097	0.937029
78	E	373	8611	0.938367	1.05534
78	F	586	7893	0.898816	1.00913
78	G	197	10567	0.972509	1.09522
78	H	181	8489	0.968682	1.09075
78	K	565	6812	0.888285	0.996829
78	L	157	5728	0.960098	1.08072
78	M	1955	8665	0.745097	0.829553
78	N	623	4140	0.814215	0.910298
78	P	3307	2440	0.327324	0.3415
78	Q	375	5664	0.908768	1.02076
78	R	789	7041	0.854764	0.957669
78	S	1535	9353	0.800735	0.894551
78	T	458	6036	0.896818	1.0068
78	V	754	8410	0.880325	0.98753
78	W	706	6804	0.864054	0.968521
78	Y	970	9549	0.866531	0.971414
79	*	15844	616	0.0249998	-0.0116825
79	A	189	4874	0.944467	1.06246
79	C	573	8600	0.908242	1.02014
79	D	290	6494	0.936582	1.05325
79	E	684	2385	0.696931	0.773284
79	F	290	5572	0.926855	1.04189
79	H	1402	7382	0.776411	0.866135
79	I	798	9930	0.891382	1.00045
79	K	568	6709	0.886232	0.994429
79	L	644	13603	0.933023	1.04909
79	M	1268	8000	0.806235	0.900976
79	N	202	5185	0.944222	1.06218
79	P	12267	1304	0.0655132	0.0356462
79	Q	593	5190	0.852334	0.954829
79	R	507	4359	0.850078	0.952194
79	S	384	3184	0.845402	0.946731
79	T	0	6689	1	1.12734
79	V	780	9278	0.886938	0.995254
79	W	860	8794	0.870864	0.976477
79	Y	1096	6587	0.798535	0.89198
80	*	13766	239	0.0113204	-0.0276631
80	A	184	10402	0.973879	1.09682
80	C	586	8051	0.900605	1.01122
80	D	209	10877	0.971689	1.09426
80	E	0	8506	1	1.12734
80	F	478	5285	0.879399	0.986447
80	G	1150	9970	0.851137	0.953431
80	I	542	7773	0.904381	1.01563
80	K	722	10337	0.904235	1.01546
80	L	1230	12262	0.867981	0.973108
80	M	518	9349	0.922498	1.0368
80	N	321	4892	0.909508	1.02162
80	P	797	16101	0.930184	1.04578
80	Q	155	4599	0.951381	1.07054
80	R	466	9778	0.932606	1.04861
80	S	419	6500	0.91096	1.02332
80	T	99	4413	0.967103	1.08891
80	V	1800	7010	0.719762	0.799955
80	W	263	10631	0.963845	1.0851
80	Y	497	8337	0.917101	1.03049
81	*	7560	753	0.0616395	0.0311209
81	A	1056	10275	0.865175	0.969831
81	C	199	5747	0.950115	1.06906
81	D	0	6958	1	1.12734
81	E	201	4023	0.929577	1.04507
81	F	832	7403	0.8544	0.957243
81	G	411	10611	0.944527	1.06253
81	H	1127	6410	0.789519	0.881448
81	I	767	8681	0.881857	0.989319
81	K	422	4196	0.867681	0.972759
81	L	456	4332	0.862359	0.966541
81	M	985	9027	0.858035	0.961489
81	N	1563	9035	0.792198	0.884578
81	P	4	4582	0.998678	1.12579
81	Q	1262	7622	0.799323	0.892901
81	R	193	8445	0.966508	1.08821
81	T	534	5479	0.871245	0.976922
81	V	347	10857	0.953778	1.07334
81	W	723	7046	0.865359	0.970046
81	Y	543	6159	0.882081	0.989581
82	*	13866	534	0.0247693	-0.0119518
82	A	1222	6033	0.765035	0.852845
82	C	573	7344	0.89421	1.00375
82	D	373	4326	0.884377	0.992263
82	E	871	11940	0.900405	1.01099
82	F	673	6726	0.868267	0.973442
82	G	767	10057	0.896346	1.00625
82	H	732	5880	0.84121	0.941834
82	I	470	8069	0.918847	1.03253
82	K	533	9906	0.924569	1.03922
82	L	1026	9269	0.856281	0.95944
82	N	324	5203	0.913724	1.02655
82	P	667	7935	0.886952	0.995271
82	Q	111	9168	0.981973	1.10628
82	R	1152	12557	0.87788	0.984673
82	S	878	10470	0.88719	0.995549
82	T	695	5939	0.849299	0.951284
82	V	918	5169	0.787842	0.879488
82	W	973	8538	0.852661	0.955212
82	Y	1495	5592	0.711553	0.790366
83	*	12619	1600	0.0771674	0.049261
83	A	508	6592	0.895375	1.00511
83	C	1105	11432	0.872172	0.978005
83	D	274	3003	0.878464	0.985356
83	E	321	5197	0.914364	1.02729
83	F	557	6104	0.878453	0.985343
83	G	197	8852	0.967357	1.0892
83	H	0	4359	1	1.12734
83	I	734	8764	0.887317	0.995698
83	K	221	4201	0.926126	1.04103
83	L	1575	9232	0.794481	0.887244
83	M	291	4273	0.906402	1.01799
83	N	286	6736	0.939514	1.05668
83	P	108	9033	0.982194	1.10653
83	R	263	9173	0.958337	1.07867
83	S	0	6358	1	1.12734
83	T	317	5410	0.918402	1.03201
83	V	87	9804	0.986723	1.11183
83	W	782	10290	0.896674	1.00663
83	Y	368	4130	0.880973	0.988287
84	*	18536	574	0.0200139	-0.0175071
84	A	412	7820	0.926023	1.04091
84	C	376	5642	0.908224	1.02012
84	D	250	3780	0.908856	1.02086
84	E	446	4106	0.858588	0.962136
84	F	245	7469	0.952619	1.07198
84	G	383	8183	0.933734	1.04992
84	H	556	4550	0.843677	0.944716
84	I	112	7922	0.979013	1.10282
84	K	562	7182	0.893933	1.00343
84	L	213	4952	0.938773	1.05581
84	M	348	6124	0.920671	1.03466
84	P	634	5462	0.850338	0.952497
84	Q	0	2840	1	1.12734
84	R	714	4659	0.811441	0.907058
84	S	170	4941	0.950417	1.06941
84	T	216	6297	0.950559	1.06958
84	V	176	8398	0.969201	1.09136
84	W	92	9695	0.985815	1.11077
84	Y	238	3115	0.896176	1.00605
85	*	15015	463	0.019931	-0.017604
85	A	0	2162	1	1.12734
85	D	14704	5787	0.206071	0.199849
85	E	10563	1011	0.0593741	0.0284744
85	F	551	5574	0.869649	0.975058
85	G	171	6220	0.959982	1.08059
85	H	198	2474	0.89178	1.00091
85	I	793	9081	0.883072	0.990738
85	K	536	5820	0.877466	0.984189
85	L	5331	5708	0.413882	0.442619
85	M	1174	10300	0.85264	0.955187
85	N	643	8039	0.891837	1.00098
85	P	1448	3691	0.627018	0.691609
85	Q	2400	4687	0.562928	0.616738
85	R	755	8170	0.877098	0.98376
85	S	279	5961	0.933734	1.04992
85	T	194	4117	0.933314	1.04943
85	V	1542	12400	0.841355	0.942004
85	W	10863	679	0.0395906	0.00536289
85	Y	2709	4586	0.527512	0.575364
86	*	9707	250	0.0167015	-0.0213767
86	A	400	3026	0.833031	0.932279
86	C	846	9749	0.883719	0.991494
86	D	366	8586	0.939288	1.05641
86	E	328	7910	0.940844	1.05823
86	F	363	4301	0.886545	0.994796
86	G	198	3454	0.92003	1.03391
86	H	956	7471	0.837502	0.937502
86	I	0	4452	1	1.12734
86	K	0	5591	1	1.12734
86	L	409	4361	0.875498	0.98189
86	M	5625	632	0.0689869	0.0397043
86	N	298	3444	0.884016	0.991841
86	P	11331	162	0.00934086	-0.0299756
86	Q	0	7735	1	1.12734
86	R	922	9158	0.867561	0.972619
86	S	0	4644	1	1.12734
86	T	224	7129	0.954523	1.07421
86	W	15835	1256	0.04971	0.0171846
86	Y	781	7101	0.857068	0.960359
87	*	9544	313	0.0211708	-0.0161556
87	A	190	4644	0.941587	1.0591
87	C	1177	7967	0.816987	0.913537
87	D	11013	2220	0.117343	0.0961946
87	E	1155	9167	0.839598	0.939951
87	F	390	6332	0.914585	1.02755
87	G	2311	9210	0.724389	0.805361
87	H	2555	5294	0.577435	0.633685
87	I	1012	9665	0.862986	0.967273
87	K	7354	1594	0.12507	0.105222
87	M	651	7937	0.889389	0.998117
87	N	412	7133	0.919472	1.03326
87	P	19678	777	0.02538	-0.0112383
87	Q	2600	12018	0.75299	0.838773
87	R	17226	485	0.0182299	-0.0195913
87	S	820	9351	0.882639	0.990233
87	T	767	9967	0.895508	1.00527
87	V	592	7049	0.887041	0.995375
87	W	2223	4536	0.573689	0.629309
87	Y	1077	10589	0.866385	0.971244
88	*	12989	152	0.00765852	-0.031941
88	A	786	9268	0.886058	0.994227
88	C	1114	8822	0.839299	0.939602
88	D	917	7678	0.846672	0.948215
88	E	1150	11233	0.865626	0.970357
88	F	413	3965	0.863603	0.967994
88	G	1342	15234	0.882165	0.989679
88	H	963	8898	0.85903	0.962652
88	I	652	6066	0.859861	0.963623
88	L	417	7516	0.922402	1.03668
88	M	353	6804	0.92707	1.04214
88	N	821	11106	0.899207	1.00959
88	P	980	5227	0.778642	0.868741
88	Q	379	10609	0.948615	1.06731
88	R	889	6199	0.821387	0.918677
88	S	1051	6551	0.804334	0.898755
88	T	213	3412	0.913528	1.02632
88	V	199	8654	0.966307	1.08798
88	W	874	8282	0.862058	0.966189
88	Y	193	3929	0.93068	1.04635
89	*	12012	835	0.0438349	0.0103212
89	A	889	8484	0.862898	0.96717
89	C	1387	8312	0.798072	0.891439
89	D	11960	885	0.0465302	0.0134699
89	E	22297	693	0.0200859	-0.017423
89	F	284	4350	0.909922	1.02211
89	G	15017	1535	0.0631552	0.0328916
89	H	6533	1235	0.110852	0.0886124
89	I	678	2472	0.706276	0.784201
89	K	22769	819	0.0231726	-0.0138171
89	M	230	8102	0.958732	1.07913
89	N	11449	1434	0.0763007	0.0482484
89	P	11519	302	0.0169966	-0.021032
89	Q	19176	1029	0.0341798	-0.000958161
89	R	14784	301	0.0132495	-0.0254095
89	S	3005	2986	0.395892	0.421602
89	T	0	4583	1	1.12734
89	V	506	8253	0.914942	1.02797
89	W	608	6655	0.878327	0.985195
89	Y	208	5943	0.949605	1.06846
90	*	21228	1150	0.0344952	-0.000589666
90	A	373	6611	0.921191	1.03527
90	C	782	5593	0.825079	0.92299
90	D	896	7825	0.852062	0.954512
90	E	0	4725	1	1.12734
90	F	327	4526	0.901265	1.01199
90	G	222	5573	0.943039	1.06079
90	H	469	7019	0.908004	1.01986
90	I	83	4150	0.970567	1.09295
90	L	276	10384	0.961259	1.08208
90	M	291	5968	0.931155	1.04691
90	N	374	3195	0.849261	0.951239
90	P	751	5840	0.836827	0.936714
90	Q	1635	7674	0.755825	0.842085
90	R	604	7683	0.893492	1.00291
90	S	330	7406	0.936712	1.0534
90	T	357	7147	0.929592	1.04508
90	V	906	10795	0.887107	0.995453
90	W	0	2490	1	1.12734
90	Y	964	7792	0.842041	0.942805
91	*	8653	608	0.0442874	0.0108498
91	A	206	5460	0.945887	1.06412
91	C	208	6261	0.952042	1.07131
91	D	14944	1499	0.0620485	0.0315987
91	E	17950	687	0.0246197	-0.0121265
91	F	7770	4046	0.255629	0.257744
91	G	2299	3879	0.526683	0.574396
91	H	12314	424	0.022204	-0.0149486
91	I	183	6091	0.956429	1.07644
91	K	18904	715	0.0243371	-0.0124567
91	L	0	4211	1	1.12734
91	M	82	7021	0.982599	1.10701
91	N	12945	699	0.034387	-0.000716121
91	P	17758	1438	0.0506974	0.0183381
91	Q	11256	1088	0.059927	0.0291203
91	R	15969	234	0.00957144	-0.0297063
91	S	640	8338	0.895747	1.00555
91	T	830	5325	0.808837	0.904015
91	W	21559	1205	0.0355512	0.000643871
91	Y	16447	775	0.0301398	-0.00567782
92	*	5785	352	0.0385805	0.00418287
92	A	100	7744	0.980796	1.1049
92	C	695	6940	0.86817	0.97333
92	E	207	3782	0.923368	1.03781
92	F	994	11619	0.885176	0.993197
92	G	106	801	0.832876	0.932099
92	H	403	6772	0.917234	1.03065
92	I	578	8132	0.902711	1.01368
92	K	252	4443	0.920809	1.03482
92	L	289	4945	0.918597	1.03224
92	M	490	8462	0.919285	1.03304
92	N	403	6082	0.908701	1.02068
92	P	1113	9297	0.846364	0.947855
92	Q	517	6226	0.888169	0.996693
92	R	243	5639	0.938666	1.05568
92	S	575	5666	0.866643	0.971546
92	T	826	7775	0.861261	0.965258
92	V	386	3881	0.868954	0.974245
92	W	641	9142	0.9039	1.01507
92	Y	780	7828	0.868744	0.974
93	*	16411	1217	0.0466267	0.0135826
93	A	658	8995	0.900155	1.0107
93	C	684	5492	0.841151	0.941766
93	D	996	8149	0.843649	0.944683
93	E	850	5432	0.808231	0.903307
93	F	421	7387	0.920457	1.03441
93	G	1123	10747	0.863227	0.967555
93	H	329	5337	0.914518	1.02747
93	I	380	6834	0.922243	1.0365
93	K	405	2640	0.811284	0.906874
93	L	228	4610	0.930239	1.04584
93	M	770	7421	0.864058	0.968525
93	N	0	5606	1	1.12734
93	P	766	8497	0.879745	0.986851
93	Q	946	10651	0.88131	0.98868
93	R	159	4185	0.94553	1.0637
93	S	26	6489	0.993961	1.12028
93	V	342	8216	0.94063	1.05798
93	W	190	4006	0.932909	1.04896
93	Y	647	9997	0.910636	1.02294
94	*	14264	720	0.032217	-0.00325116
94	C	318	4818	0.909025	1.02106
94	D	715	6055	0.84814	0.94993
94	E	413	8826	0.933748	1.04994
94	F	566	6778	0.887612	0.996042
94	G	856	11139	0.895638	1.00542
94	H	913	5080	0.785845	0.877156
94	I	467	6079	0.895668	1.00545
94	K	886	9604	0.877283	0.983975
94	L	214	5503	0.944318	1.06229
94	M	876	12298	0.902521	1.01346
94	N	532	8129	0.909725	1.02187
94	P	723	7938	0.878653	0.985576
94	Q	908	7490	0.844724	0.94594
94	R	0	4185	1	1.12734
94	S	0	5605	1	1.12734
94	T	598	6159	0.87167	0.977419
94	V	332	12216	0.960422	1.0811
94	W	659	12009	0.923184	1.0376
94	Y	975	9269	0.862442	0.966638
95	*	15406	260	0.0110076	-0.0280285
95	A	1834	7730	0.735428	0.818257
95	C	202	9207	0.967804	1.08972
95	D	3218	1319	0.212795	0.207705
95	E	11431	873	0.0479518	0.0151306
95	F	15186	618	0.0261372	-0.0103537
95	G	4447	5529	0.450539	0.485443
95	H	3209	8179	0.626993	0.691581
95	I	16944	387	0.0148395	-0.023552
95	K	6929	3078	0.226583	0.223812
95	L	9031	2821	0.170818	0.158666
95	M	6156	5387	0.365932	0.386603
95	P	13910	1467	0.0650304	0.0350823
95	Q	755	10149	0.898634	1.00892
95	R	9821	4734	0.241216	0.240907
95	S	493	7492	0.909275	1.02135
95	T	10934	547	0.0319394	-0.00357546
95	V	21353	641	0.0194134	-0.0182087
95	W	12291	965	0.0492302	0.0166241
95	Y	8438	3572	0.218251	0.214078
96	*	11334	1066	0.0584055	0.0273429
96	A	606	7526	0.891191	1.00022
96	C	895	8506	0.862408	0.966598
96	D	757	9183	0.888892	0.997538
96	E	0	6707	1	1.12734
96	F	0	2629	1	1.12734
96	G	513	8248	0.913819	1.02666
96	H	587	6842	0.884886	0.992858
96	I	254	3068	0.888467	0.997041
96	K	384	6153	0.913551	1.02634
96	L	1236	8520	0.819693	0.916697
96	M	0	2796	1	1.12734
96	N	98	6538	0.977777	1.10137
96	Q	480	6604	0.900731	1.01137
96	R	511	7819	0.909839	1.02201
96	S	397	7798	0.928337	1.04362
96	T	254	5122	0.930065	1.04564
96	V	768	6803	0.853842	0.956591
96	W	334	9061	0.947066	1.0655
96	Y	1367	7724	0.788423	0.880167
97	*	12231	664	0.0345657	-0.000507401
97	A	107	3614	0.957036	1.07714
97	C	1297	10054	0.836395	0.936209
97	D	757	4319	0.790037	0.882052
97	E	970	10199	0.873965	0.980099
97	F	517	6816	0.896851	1.00684
97	G	359	7859	0.935222	1.05166
97	H	519	8660	0.916697	1.03002
97	I	423	7455	0.92078	1.03479
97	L	226	7289	0.955097	1.07488
97	M	472	4373	0.859356	0.963033
97	N	94	3370	0.959422	1.07993
97	P	1013	5085	0.76801	0.85632
97	Q	959	4872	0.770139	0.858808
97	R	110	9196	0.982186	1.10653
97	S	660	12291	0.924709	1.03938
97	T	393	5968	0.909215	1.02128
97	V	260	8203	0.954144	1.07377
97	W	336	9462	0.948907	1.06765
97	Y	453	10818	0.940296	1.05759
98	*	15039	1333	0.0552274	0.0236301
98	A	381	8685	0.937631	1.05448
98	C	116	8410	0.979514	1.1034
98	D	1481	11413	0.835589	0.935267
98	E	735	8074	0.878709	0.985642
98	F	1464	1710	0.43513	0.467442
98	G	448	7090	0.912566	1.02519
98	H	208	9019	0.966212	1.08786
98	I	23358	1140	0.0311836	-0.00445837
98	K	525	4215	0.84114	0.941753
98	L	7640	4844	0.294853	0.303567
98	M	1276	11481	0.855782	0.958858
98	N	310	6107	0.928532	1.04385
98	P	3296	4287	0.461727	0.498513
98	Q	87	4366	0.970671	1.09307
98	R	904	7489	0.845285	0.946595
98	S	2307	7068	0.668932	0.740575
98	V	681	7262	0.87551	0.981904
98	W	16138	2728	0.100302	0.0762869
98	Y	1292	10303	0.840234	0.940694
99	*	17218	620	0.023197	-0.0137885
99	A	596	10631	0.921653	1.03581
99	C	432	4863	0.881291	0.988658
99	D	3660	7770	0.583349	0.640595
99	E	1106	7716	0.821461	0.918763
99	F	3467	5370	0.505317	0.549435
99	G	358	6568	0.923661	1.03816
99	H	449	5368	0.887446	0.995848
99	I	480	8278	0.919183	1.03292
99	K	4042	6334	0.50823	0.552838
99	L	6278	3938	0.292629	0.300969
99	M	878	6087	0.820538	0.917684
99	N	959	12077	0.892535	1.00179
99	Q	1091	7305	0.815356	0.911631
99	R	6142	3639	0.280959	0.287335
99	S	763	8131	0.875437	0.981819
99	T	179	3349	0.925032	1.03976
99	V	7296	4532	0.290608	0.298607
99	W	2265	5535	0.617097	0.68002
99	Y	1044	11178	0.875949	0.982417
100	*	10500	166	0.0103188	-0.0288332
100	A	852	5381	0.806398	0.901166
100	C	219	2839	0.895282	1.005
100	D	946	9073	0.863485	0.967857
100	E	683	9282	0.899625	1.01008
100	F	184	3772	0.931128	1.04688
100	G	782	2328	0.662541	0.733109
100	H	1098	8049	0.828607	0.927111
100	I	276	5792	0.932614	1.04862
100	L	643	6825	0.875002	0.981311
100	M	367	4829	0.89667	1.00662
100	N	1041	7761	0.83099	0.929895
100	P	401	6285	0.91179	1.02429
100	Q	552	1772	0.679189	0.752557
100	R	207	2846	0.900669	1.0113
100	S	0	6504	1	1.12734
100	T	732	6275	0.849704	0.951756
100	V	244	4538	0.924617	1.03927
100	W	227	1113	0.763794	0.851395
100	Y	539	4345	0.841682	0.942385
101	*	12567	676	0.0342603	-0.000864129
101	A	1035	7387	0.824776	0.922636
101	C	131	3849	0.950926	1.07001
101	D	9689	661	0.0430552	0.00941026
101	E	3117	2922	0.382046	0.405428
101	F	676	6030	0.854711	0.957606
101	G	1177	8784	0.831135	0.930064
101	H	272	7078	0.944939	1.06301
101	I	416	6947	0.916759	1.03009
101	K	363	7641	0.932806	1.04884
101	L	523	10329	0.928698	1.04404
101	M	835	5428	0.810862	0.906381
101	N	1262	4533	0.703165	0.780567
101	P	15537	1891	0.0743035	0.0459153
101	Q	609	4835	0.839639	0.939999
101	R	194	7667	0.96305	1.08417
101	S	418	7151	0.918584	1.03222
101	T	662	8118	0.889957	0.998782
101	V	459	9788	0.933615	1.04978
101	W	339	9846	0.950384	1.06937
102	*	10592	523	0.0315372	-0.00404536
102	A	565	6435	0.882509	0.990081
102	C	295	4815	0.914998	1.02803
102	D	674	7994	0.886648	0.994915
102	E	1339	7310	0.782628	0.873398
102	F	678	4937	0.827655	0.925998
102	G	433	9144	0.933008	1.04908
102	H	205	3423	0.91675	1.03008
102	I	1760	12666	0.825971	0.924031
102	L	875	6084	0.820969	0.918188
102	M	280	4893	0.920158	1.03406
102	N	409	6700	0.91528	1.02836
102	P	9559	594	0.0393683	0.00510318
102	Q	1331	6189	0.754095	0.840064
102	R	314	10055	0.95479	1.07452
102	S	382	9556	0.94285	1.06057
102	T	450	3453	0.834999	0.934579
102	V	199	4539	0.937666	1.05452
102	W	487	11020	0.937199	1.05397
102	Y	915	10665	0.884885	0.992857
103	*	18498	713	0.0247901	-0.0119274
103	A	708	7621	0.876527	0.983093
103	C	382	5631	0.90673	1.01838
103	D	5942	7469	0.453248	0.488608
103	E	714	6593	0.858952	0.96256
103	G	717	8506	0.886671	0.994943
103	H	1762	8439	0.759537	0.846422
103	I	667	9051	0.89949	1.00992
103	K	308	5099	0.916095	1.02932
103	L	1088	8730	0.841062	0.941662
[truncated: 4,041 more rows]

## Sheet: TF scores rep 1
Position	aa	Counts (uncut)	Counts (cut)	functional score (unnormalized)	functional score (normalized)
WT	WT	88	23608	1	1
1	*	11023	40	0.00340399	-0.0261261
1	A	0	65
1	C	136	878	0.85869	0.860732
1	D	2	7686	0.999724	1.00697
1	E	676	2503	0.777043	0.77607
1	F	0	82
1	H	3	40
1	I	0	149	1	1.00726
1	K	0	185	1	1.00726
1	L	0	53
1	M	1	440	0.997591	1.00476
1	N	0	387	1	1.00726
1	P	0	273	1	1.00726
1	Q	0	198	1	1.00726
1	R	0	40
1	T	0	37
1	V	0	76
1	W	0	167	1	1.00726
1	Y	0	181	1	1.00726
2	*	15912	258	0.0150323	-0.0140686
2	A	10	10092	0.998948	1.00617	0.976699
2	C	13	7322	0.998117	1.00531
2	D	3981	7568	0.641495	0.635518
2	E	1338	13716	0.906094	0.909886
2	F	50	7601	0.99306	1.00006
2	H	9	7082	0.998652	1.00586
2	I	43	9625	0.995276	1.00236
2	K	21	9971	0.997767	1.00494
2	L	158	15201	0.989078	0.995933
2	M	3	8572	0.999628	1.00687
2	N	7	4580	0.998379	1.00558
2	P	21	1721	0.987202	0.993988
2	Q	75	13418	0.994097	1.00114
2	R	49	5291	0.990257	0.997156
2	S	23	9235	0.997361	1.00452
2	T	201	7565	0.972547	0.978792
2	V	5	11137	0.999523	1.00676
2	W	114	7096	0.983218	0.989857
2	Y	5	8039	0.99934	1.00657
3	*	9096	215	0.0217641	-0.00708834
3	A	15951	603	0.0343601	0.00597252	0.373693
3	C	4608	4333	0.46952	0.457195
3	D	13807	49	0.00332934	-0.0262035
3	E	10665	763	0.0630914	0.0357643
3	G	17432	126	0.00675753	-0.0226488
3	H	10059	150	0.0138418	-0.0153031
3	I	0	6043	1	1.00726
3	L	5	2939	0.998196	1.00539
3	M	0	4452	1	1.00726
3	N	7312	490	0.0593342	0.0318684
3	P	3190	18818	0.847388	0.849012
3	Q	12282	351	0.0261951	-0.00249385
3	R	10768	955	0.0770473	0.0502353
3	S	8604	394	0.0413217	0.0131911
3	T	5832	189	0.0296008	0.00103764
3	V	264	16353	0.983138	0.989774
3	W	0	2849	1	1.00726
3	Y	2507	7000	0.724379	0.721462
4	*	10538	151	0.0133079	-0.0158567
4	A	49	9777	0.994704	1.00177	0.733079
4	C	0	2648	1	1.00726
4	D	17789	710	0.0362076	0.00788825
4	E	6997	2502	0.25182	0.231459
4	F	2751	15387	0.840375	0.84174
4	G	8303	5904	0.400946	0.38609
4	H	84	15325	0.99421	1.00126
4	I	6	635	0.990061	0.996953
4	L	663	2905	0.804848	0.804902
4	M	258	11843	0.977379	0.983802
4	N	360	4597	0.923191	0.927614
4	P	13	8654	0.998407	1.00561
4	Q	0	2959	1	1.00726
4	S	104	282	0.718489	0.715355
4	T	6	5215	0.998779	1.00599
4	V	0	267	1	1.00726
4	W	5173	1478	0.211935	0.190102
4	Y	2568	11018	0.801527	0.801458
5	*	14732	537	0.033172	0.00474057
5	A	132	2810	0.952466	0.957969	0.975705
5	C	0	2583	1	1.00726
5	D	1580	11505	0.872675	0.875233
5	E	400	17506	0.9763	0.982683
5	F	0	134	1	1.00726
5	G	145	13634	0.988827	0.995673
5	H	4	638	0.993383	1.0004
5	I	0	1397	1	1.00726
5	L	0	735	1	1.00726
5	M	0	233	1	1.00726
5	N	0	4949	1	1.00726
5	P	0	848	1	1.00726
5	Q	0	3243	1	1.00726
5	R	6	4263	0.998507	1.00571
5	S	3	1846	0.998276	1.00547
5	T	28	1253	0.97681	0.983212
5	V	15	4328	0.996331	1.00345
5	W	0	127	1	1.00726
5	Y	450	963	0.668248	0.663258
6	*	8959	122	0.0126555	-0.0165332
6	A	5158	10190	0.650292	0.64464	0.517477
6	C	924	7754	0.887626	0.890735
6	D	12316	695	0.0504369	0.0226427
6	E	10453	427	0.0370263	0.0087372
6	F	468	1042	0.676972	0.672305
6	G	12873	4982	0.267012	0.247211
6	H	4790	2194	0.301253	0.282716
6	I	0	2240	1	1.00726
6	K	7407	232	0.0286376	3.88243e-05
6	L	101	9788	0.989156	0.996014
6	N	11187	130	0.0108197	-0.0184367
6	P	10246	368	0.0327012	0.00425241
6	Q	190	12618	0.984254	0.990931
6	R	11512	1843	0.130956	0.106134
6	S	4777	3640	0.417665	0.403426
6	T	1829	10878	0.848442	0.850106
6	V	134	6200	0.977554	0.983983
6	W	1768	12993	0.873694	0.87629
6	Y	1871	12308	0.860954	0.863079
7	*	7452	303	0.0368611	0.00856585
7	C	97	305	0.747451	0.745386	0.286895
7	D	10173	544	0.0479217	0.0200347
7	E	5622	244	0.0392482	0.0110411
7	F	8854	261	0.0269976	-0.00166174
7	G	9180	6388	0.395765	0.380717
7	H	12491	586	0.0422906	0.0141957
7	I	5603	14373	0.707136	0.703582
7	K	9091	143	0.0145899	-0.0145274
7	L	6733	153	0.0209412	-0.00794165
7	M	16632	1257	0.0664133	0.0392088
7	N	8780	2916	0.238159	0.217294
7	P	3446	4063	0.526019	0.51578
7	Q	8502	168	0.0182597	-0.0107221
7	R	11960	214	0.016563	-0.0124814
7	S	177	768	0.803309	0.803306
7	T	37	4132	0.990576	0.997487
7	V	14	2550	0.994201	1.00125
7	W	17598	1360	0.0678094	0.0406564
7	Y	7288	295	0.0367015	0.00840039
8	*	5658	179	0.0289172	0.000328731
8	A	0	2001	1	1.00726	0.794085
8	C	0	3600	1	1.00726
8	D	4551	27196	0.849052	0.850738
8	E	3473	5061	0.578351	0.570044
8	G	13827	3236	0.180521	0.157528
8	H	0	1145	1	1.00726
8	I	6490	6830	0.497631	0.486344
8	K	3029	1821	0.361379	0.345062
8	L	33	6927	0.994964	1.00204
8	M	10	8154	0.998699	1.00591
8	N	51	7467	0.992796	0.999788
8	P	6797	333	0.0440816	0.0160529
8	Q	0	1074	1	1.00726
8	R	4537	12508	0.721832	0.718821
8	S	43	13731	0.996684	1.00382
8	T	149	4501	0.966025	0.972029
8	V	1788	19896	0.912846	0.916886
8	W	2	2226	0.999046	1.00627
8	Y	0	429	1	1.00726
9	*	9099	484	0.0476808	0.0197849
9	A	5100	4039	0.427079	0.413187	0.0637367
9	C	2123	5490	0.7088	0.705308
9	D	12522	345	0.0252776	-0.00344518
9	E	8734	365	0.0378472	0.00958831
9	F	2505	87	0.0316556	0.00316825
9	G	9036	19	0.00197528	-0.0276076
9	H	9754	568	0.0519637	0.0242259
9	I	15457	897	0.051794	0.0240499
9	K	10797	283	0.0240773	-0.00468975
9	L	5379	120	0.0205667	-0.00832998
9	M	9496	120	0.0117548	-0.0174671
9	N	13544	346	0.0234811	-0.00530794
9	Q	6414	190	0.0271263	-0.00152824
9	R	11035	233	0.0194871	-0.00944944
9	S	8774	218	0.0228522	-0.00596006
9	T	5519	203	0.0334629	0.00504224
9	V	6651	479	0.0634852	0.0361727
9	W	13609	518	0.034588	0.00620888
9	Y	13424	1480	0.0940176	0.0678319
10	*	12607	0	0	-0.0296557
10	A	10723	64	0.0055865	-0.023863
10	C	4887	10025	0.658804	0.653466
10	D	7208	94	0.0121262	-0.017082
10	E	19317	327	0.0156838	-0.013393
10	F	9093	134	0.0136812	-0.0154696
10	G	11650	330	0.0259699	-0.00272735
10	H	4686	133	0.0260201	-0.00267528
10	I	8393	20	0.00223794	-0.0273352
10	K	20932	740	0.0322043	0.0037372
10	L	14416	53	0.00344858	-0.0260799
10	M	10136	78	0.00719123	-0.0221991
10	N	15348	135	0.00821128	-0.0211414
10	P	4596	53	0.0107378	-0.0185216
10	Q	8628	97	0.0104713	-0.018798
10	R	8959	65	0.00678278	-0.0226226
10	T	4	125	0.967121	0.973165
10	V	10255	291	0.0260147	-0.00268085
10	W	10743	516	0.0432544	0.0151951
10	Y	11773	147	0.0116162	-0.0176108
11	*	11565	476	0.0372961	0.00901693
11	A	9120	7990	0.451945	0.438971
11	C	11319	800	0.0623763	0.0350229
11	D	14472	1205	0.0726773	0.045704
11	E	4524	251	0.049631	0.0218071
11	F	17881	319	0.0165149	-0.0125313
11	H	8718	652	0.0657652	0.0385368
11	I	18926	389	0.0189792	-0.00997602
11	K	8881	238	0.024604	-0.00414365
11	L	12081	356	0.0269882	-0.00167139
11	M	11692	549	0.0423263	0.0142328
11	N	16949	360	0.0196007	-0.00933164
11	P	11094	1083	0.0841535	0.0576038
11	Q	17997	313	0.0161065	-0.0129547
11	R	12313	851	0.0610806	0.0336793
11	S	3443	4055	0.525745	0.515495
11	T	10390	581	0.0500026	0.0221924
11	V	13348	416	0.028499	-0.000104861
11	W	7719	272	0.0321031	0.00363221
11	Y	10480	383	0.0332551	0.00482681
12	*	9683	1659	0.138872	0.114342
12	A	1089	5154	0.816674	0.817165
12	C	925	18014	0.948269	0.953617
12	D	6108	2838	0.304272	0.285847
12	E	8003	2284	0.211747	0.189907
12	F	9096	4316	0.308735	0.290474
12	G	10586	69	0.00609776	-0.0233329
12	H	2027	6540	0.752286	0.7504
12	I	2450	4727	0.644893	0.639042
12	L	1510	13997	0.897173	0.900635
12	M	76	9331	0.991421	0.998363
12	N	6110	7855	0.547528	0.538082
12	P	3476	6397	0.633999	0.627745
12	Q	7	8260	0.9991	1.00633
12	R	0	2260	1	1.00726
12	S	1342	13331	0.903383	0.907075
12	T	6210	6406	0.492635	0.481163
12	V	1239	18891	0.934859	0.939713
12	W	8903	4730	0.333366	0.316015
12	Y	3890	7305	0.638674	0.632593
13	*	11358	351	0.0282659	-0.000346623
13	A	102	3695	0.971508	0.977715
13	C	0	5501	1	1.00726
13	D	12578	169	0.012489	-0.0167058
13	E	19756	904	0.0412919	0.0131602
13	F	19340	341	0.0163252	-0.012728
13	G	11894	252	0.0195527	-0.0093814
13	H	15197	253	0.0154283	-0.013658
13	I	252	6471	0.96027	0.966062
13	K	12008	298	0.0228259	-0.00598741
13	L	12250	2498	0.161032	0.13732
13	M	10247	238	0.0213943	-0.00747184
13	N	13886	158	0.0105965	-0.0186681
13	P	1369	2978	0.671866	0.66701
13	Q	13319	431	0.0295586	0.000993872
13	R	9386	32	0.0031988	-0.0263389
13	S	2097	9552	0.810875	0.811151
13	T	50	5555	0.990528	0.997437
13	W	13689	603	0.0398118	0.0116254
13	Y	15313	346	0.020825	-0.00806209
14	*	13827	265	0.01772	-0.0112818
14	A	10665	303	0.0260453	-0.0026491
14	C	18178	580	0.0291568	0.000577243
14	D	13534	410	0.0277241	-0.000908428
14	F	9077	141	0.0144106	-0.0147133
14	G	15141	292	0.0178289	-0.0111688
14	H	14768	505	0.0311832	0.00267841
14	I	7855	149	0.0175414	-0.0114669
14	K	20741	1397	0.0596184	0.0321631
14	L	13794	594	0.0389538	0.0107358
14	M	6864	237	0.0314768	0.00298283
14	N	14267	278	0.0180106	-0.0109804
14	P	11051	191	0.0160078	-0.0130571
14	Q	7427	540	0.0640532	0.0367616
14	R	7509	154	0.0189384	-0.0100183
14	S	14069	1895	0.112516	0.0870136
14	T	9245	569	0.0547592	0.0271246
14	V	21201	1388	0.058046	0.0305327
14	W	15838	635	0.036366	0.00805244
14	Y	10201	260	0.0234285	-0.00536254
15	*	8711	328	0.0342286	0.00583624
15	A	0	1083	1	1.00726
15	C	6	1156	0.994516	1.00157
15	D	19	6966	0.997111	1.00426
15	E	97	5621	0.981996	0.98859
15	F	0	6341	1	1.00726
15	H	0	3220	1	1.00726
15	I	36	856	0.95723	0.96291
15	K	0	430	1	1.00726
15	L	0	2403	1	1.00726
15	M	0	1759	1	1.00726
15	N	19	969	0.979594	0.986099
15	P	93	863	0.897272	0.900738
15	Q	32	1820	0.981663	0.988244
15	R	27	2346	0.987921	0.994733
15	S	12	1584	0.992016	0.998979
15	T	0	2501	1	1.00726
15	V	4	399	0.989462	0.996331
15	W	44	5421	0.991451	0.998393
15	Y	0	4454	1	1.00726
16	*	14318	402	0.0257469	-0.00295855
16	A	0	1085	1	1.00726
16	D	7718	1398	0.145661	0.121381
16	E	13235	5311	0.274159	0.254623
16	F	9573	23	0.00225636	-0.0273161
16	G	2	3386	0.999373	1.00661
16	H	15425	817	0.0474873	0.0195842
16	I	7694	454	0.0526184	0.0249048
16	K	10492	237	0.0208191	-0.00806821
16	L	1058	7812	0.874214	0.876829
16	M	10871	256	0.021685	-0.00717041
16	N	1631	9702	0.848464	0.850128
16	P	2524	189	0.0658419	0.0386163
16	Q	1586	7478	0.81611	0.81658
16	R	11775	268	0.0209738	-0.0079078
16	S	0	4295	1	1.00726
16	T	49	2995	0.982915	0.989543
16	V	89	6581	0.985836	0.992571
16	W	10554	151	0.013288	-0.0158773
16	Y	4870	41	0.00786206	-0.0215035
17	*	11741	188	0.0148479	-0.0142598
17	A	62	10665	0.993862	1.00089
17	C	124	9269	0.985986	0.992727
17	D	15036	72	0.00448701	-0.0250031
17	E	7578	8073	0.500685	0.48951
17	F	1339	13214	0.902808	0.906478
17	G	5384	7463	0.566108	0.557348
17	H	5192	3783	0.406817	0.392178
17	I	94	1702	0.944576	0.949788
17	K	9383	3344	0.251191	0.230807
17	L	104	4510	0.976087	0.982462
17	N	10173	14178	0.567441	0.558731
17	P	2416	1705	0.399132	0.384208
17	Q	5423	11369	0.663673	0.658515
17	R	13646	674	0.0444251	0.0164091
17	S	488	11743	0.957717	0.963414
17	T	0	2099	1	1.00726
17	V	16	1163	0.985594	0.992321
17	W	15315	2393	0.128216	0.103293
17	Y	9607	13924	0.577028	0.568672
18	*	9458	366	0.0351442	0.00678559
18	A	18	4151	0.995414	1.0025
18	C	0	1445	1	1.00726
18	D	16801	272	0.0150098	-0.0140919
18	E	14912	312	0.0193134	-0.00962952
18	F	3628	7	0.00181281	-0.027776
18	G	493	13835	0.963523	0.969435
18	H	7714	80	0.00966721	-0.0196317
18	I	0	2082	1	1.00726
18	K	16039	684	0.0385919	0.0103605
18	L	4	1028	0.995883	1.00299
18	M	1	5427	0.999804	1.00706
18	N	3392	7731	0.682066	0.677587
18	P	8491	322	0.0344647	0.00608102
18	Q	21222	5266	0.18934	0.166673
18	R	9810	56	0.00534443	-0.0241141
18	S	59	3835	0.983918	0.990583
18	T	10	3019	0.996493	1.00362
18	W	15828	636	0.0364433	0.00813265
18	Y	15608	665	0.0385574	0.0103247
19	*	13964	161	0.0107359	-0.0185236
19	A	58	2469	0.97565	0.98201
19	C	21	1860	0.988147	0.994968
19	D	21	6521	0.99659	1.00372
19	E	0	396	1	1.00726
19	F	80	3014	0.972574	0.97882
19	G	3	2321	0.998629	1.00584
19	H	2	840	0.997477	1.00464
19	I	20	1796	0.988308	0.995134
19	K	0	427	1	1.00726
19	L	17	3545	0.994931	1.002
19	M	0	820	1	1.00726
19	N	0	3463	1	1.00726
19	P	17	6564	0.997256	1.00441
19	R	0	468	1	1.00726
19	S	5	3258	0.998372	1.00557
19	T	25	5240	0.994957	1.00203
19	V	0	407	1	1.00726
19	W	9	1588	0.994015	1.00105
19	Y	5	3804	0.998606	1.00581
20	*	9379	131	0.0129763	-0.0162005
20	A	0	6186	1	1.00726
20	C	56	5207	0.988703	0.995544
20	D	28981	415	0.0132993	-0.0158656
20	E	17800	63	0.00332036	-0.0262128
20	F	543	20815	0.973032	0.979295
20	G	9095	1651	0.145931	0.121661
20	H	5312	81	0.0141497	-0.0149838
20	I	0	2980	1	1.00726
20	K	8181	292	0.0325039	0.00404782
20	L	36	9490	0.995986	1.0031
20	M	34	5269	0.993191	1.0002
20	N	14923	1012	0.0600014	0.0325602
20	P	7495	264	0.0320905	0.00361918
20	Q	10956	188	0.0158949	-0.0131742
20	R	18397	374	0.018776	-0.0101868
20	S	928	12910	0.92905	0.933689
20	T	34	7811	0.995397	1.00249
20	W	7167	391	0.0488429	0.0209899
20	Y	21480	646	0.0275286	-0.00111107
21	*	13243	19	0.00134862	-0.0282573
21	A	12	1476	0.991437	0.998379
21	C	0	645	1	1.00726
21	D	0	1842	1	1.00726
21	E	4	2853	0.998513	1.00572
21	F	0	1094	1	1.00726
21	G	0	2110	1	1.00726
21	H	10	3490	0.996965	1.00411
21	I	0	177	1	1.00726
21	K	0	499	1	1.00726
21	L	0	651	1	1.00726
21	M	0	473	1	1.00726
21	N	1317	2312	0.622981	0.616321
21	P	5017	341	0.0601295	0.0326931
21	Q	0	458	1	1.00726
21	R	0	814	1	1.00726
21	S	0	709	1	1.00726
21	V	0	181	1	1.00726
21	W	0	748	1	1.00726
21	Y	27	3221	0.991173	0.998106
22	*	11358	214	0.0174256	-0.011587
22	A	0	1362	1	1.00726
22	D	34	2236	0.984102	0.990774
22	E	6	4121	0.998456	1.00566
22	F	0	3556	1	1.00726
22	G	150	9582	0.983641	0.990295
22	H	55	6241	0.990724	0.99764
22	I	0	1333	1	1.00726
22	K	9	5972	0.998401	1.0056
22	L	0	2298	1	1.00726
22	M	11	1962	0.994079	1.00112
22	N	4	5931	0.999284	1.00652
22	P	10651	375	0.0320768	0.00360499
22	Q	26	2922	0.990635	0.997548
22	R	27	12652	0.997738	1.00491
22	S	0	1888	1	1.00726
22	T	2	1177	0.998198	1.00539
22	V	0	329	1	1.00726
22	W	16	6384	0.997344	1.0045
22	Y	20	3611	0.99415	1.00119
23	*	12331	247	0.0185053	-0.0104674
23	A	0	1677	1	1.00726
23	C	0	699	1	1.00726
23	D	9	1172	0.991908	0.998867
23	E	9	2410	0.996048	1.00316
23	F	10	2029	0.994791	1.00186
23	H	18	1171	0.983932	0.990597
23	I	0	583	1	1.00726
23	K	12	878	0.985687	0.992417
23	L	17	1801	0.990071	0.996963
23	M	107	3042	0.963977	0.969905
23	N	0	2137	1	1.00726
23	P	36	8907	0.995724	1.00282
23	Q	9	2093	0.995452	1.00254
23	R	2	1613	0.998684	1.00589
23	S	0	2189	1	1.00726
23	T	21	2571	0.991397	0.998338
23	V	0	1093	1	1.00726
23	W	0	2495	1	1.00726
23	Y	33	2097	0.983556	0.990207
24	*	10237	520	0.0456306	0.0176591
24	A	0	734	1	1.00726
24	C	0	964	1	1.00726
24	D	129	1850	0.931028	0.93574
24	E	0	1774	1	1.00726
24	F	0	156	1	1.00726
24	G	0	1119	1	1.00726
24	H	1	118	0.991077	0.998006
24	I	0	478	1	1.00726
24	K	0	541	1	1.00726
24	L	0	479	1	1.00726
24	M	4	559	0.992455	0.999435
24	N	0	76
24	P	7	958	0.992297	0.999271
24	Q	0	635	1	1.00726
24	R	0	700	1	1.00726
24	S	0	465	1	1.00726
24	V	0	813	1	1.00726
24	W	0	426	1	1.00726
24	Y	17	491	0.964521	0.97047
25	*	11940	600	0.0451633	0.0171745
25	A	0	380	1	1.00726
25	C	0	1351	1	1.00726
25	D	429	12142	0.963821	0.969744
25	E	296	15108	0.979609	0.986115
25	F	35	403	0.915526	0.919665
25	G	9	2057	0.995373	1.00246
25	H	34	9492	0.996209	1.00333
25	I	9	5689	0.998322	1.00552
25	K	804	3145	0.786412	0.785785
25	L	17	560	0.968756	0.974861
25	M	0	242	1	1.00726
25	N	4	6744	0.99937	1.00661
25	P	0	3375	1	1.00726
25	Q	0	1489	1	1.00726
25	R	0	2159	1	1.00726
25	S	0	1330	1	1.00726
25	V	8	5209	0.998371	1.00557
25	W	25	1232	0.978896	0.985376
25	Y	0	431	1	1.00726
26	*	22027	1277	0.0517452	0.0239993
26	A	0	371	1	1.00726
26	C	4	480	0.991224	0.998159
26	D	36	9690	0.996068	1.00318
26	E	12	3102	0.995907	1.00301
26	F	8	1411	0.994013	1.00105
26	G	125	421	0.760201	0.758607
26	H	0	1438	1	1.00726
26	I	47	1638	0.970418	0.976584
26	K	4	290	0.985558	0.992283
26	L	0	1614	1	1.00726
26	M	0	164	1	1.00726
26	N	0	154	1	1.00726
26	P	4079	15299	0.779267	0.778376
26	Q	0	546	1	1.00726
26	R	0	136	1	1.00726
26	S	9	960	0.990138	0.997032
26	V	40	910	0.955384	0.960996
26	W	2	2451	0.999134	1.00636
26	Y	0	857	1	1.00726
29	*	13284	205	0.0143176	-0.0148097
29	A	215	16032	0.985953	0.992692
29	C	9334	123	0.0122516	-0.0169519
29	D	24373	983	0.036574	0.00826816
29	E	11862	287	0.0222666	-0.00656731
29	F	21625	1042	0.0433868	0.0153324
29	H	15582	922	0.0527568	0.0250483
29	I	16002	315	0.0181917	-0.0107926
29	K	12228	309	0.0232329	-0.00556534
29	L	696	0	0	-0.0296557
29	M	1778	197	0.094441	0.068271
29	N	17482	410	0.0215983	-0.00726028
29	P	13026	375	0.0263826	-0.00229937
29	Q	14282	1178	0.0720433	0.0450466
29	R	6885	84	0.0113534	-0.0178833
29	S	3041	14254	0.815223	0.81566
29	T	11863	451	0.0345479	0.00616733
29	V	15748	672	0.0386145	0.010384
29	Y	17041	516	0.0277115	-0.000921493
30	*	15836	214	0.01256	-0.0166322
30	A	103	1528	0.933171	0.937962
30	C	42	779	0.945823	0.951082
30	D	29008	788	0.0249318	-0.00380378
30	E	13056	3469	0.20006	0.177789
30	F	0	2868	1	1.00726
30	G	2530	3403	0.558703	0.54967
30	H	12683	547	0.0390115	0.0107957
30	I	0	576	1	1.00726
30	K	10998	71	0.00603981	-0.023393
30	M	0	173	1	1.00726
30	N	695	25566	0.97193	0.978152
30	P	1232	14043	0.914741	0.918852
30	Q	862	18004	0.951596	0.957067
30	R	19494	498	0.0234811	-0.00530798
30	S	0	7629	1	1.00726
30	T	1	5962	0.999822	1.00707
30	V	0	487	1	1.00726
30	W	4971	766	0.12667	0.101689
30	Y	16092	547	0.0310034	0.00249194
31	*	4157	70	0.0156026	-0.0134772
31	A	717	0	0	-0.0296557
31	C	6686	1448	0.169332	0.145926
31	D	444	0	0	-0.0296557
31	E	1680	43	0.023525	-0.00526246
31	F	0	590	1	1.00726
31	G	1246	0	0	-0.0296557
31	H	16	2483	0.993201	1.00021
31	I	924	27	0.0267681	-0.00189966
31	K	2911	0	0	-0.0296557
31	L	595	932	0.595858	0.588196
31	M	1325	4984	0.779763	0.77889
31	N	3909	332	0.0740254	0.0471019
31	P	3791	88	0.0213822	-0.0074844
31	Q	928	394	0.285525	0.266408
31	R	3446	162	0.0423745	0.0142828
31	S	3613	40	0.0103133	-0.0189618
31	T	4074	0	0	-0.0296557
31	V	5067	29	0.00535825	-0.0240997
31	Y	0	354	1	1.00726
32	*	2858	60	0.0193776	-0.00956292
32	A	0	665	1	1.00726
32	C	0	228	1	1.00726
32	D	5341	0	0	-0.0296557
32	E	2079	0	0	-0.0296557
32	F	59	2488	0.975425	0.981777
32	G	10263	706	0.0608124	0.0334012
32	H	1661	0	0	-0.0296557
32	I	7	58
32	K	1680	129	0.0674037	0.0402357
32	M	0	381	1	1.00726
32	N	1958	2072	0.499014	0.487777
32	P	1809	0	0	-0.0296557
32	Q	416	0	0	-0.0296557
32	R	1673	0	0	-0.0296557
32	S	2408	2036	0.44316	0.429862
32	W	4663	495	0.0908424	0.0645395
32	Y	1148	0	0	-0.0296557
33	*	7022	107	0.0141399	-0.0149939
33	A	0	287	1	1.00726
33	C	0	160	1	1.00726
33	E	41	444	0.91066	0.91462
33	F	0	102	1	1.00726
33	G	19	283	0.933421	0.938222
33	H	0	198	1	1.00726
33	K	0	117	1	1.00726
33	L	0	39
33	M	0	211	1	1.00726
33	P	3495	71	0.0187627	-0.0102006
33	Q	0	198	1	1.00726
33	R	0	65
33	S	0	109	1	1.00726
33	T	4	165	0.974891	0.981223
33	V	0	113	1	1.00726
33	W	0	211	1	1.00726
33	Y	0	362	1	1.00726
34	*	3527	294	0.0727524	0.0457818
34	A	0	258	1	1.00726
34	C	0	70
34	E	0	314	1	1.00726
34	F	22	130	0.847607	0.849239
34	G	0	122	1	1.00726
34	H	7	204	0.964827	0.970787
34	I	58	2429	0.975259	0.981604
34	K	0	44
34	L	3	573	0.994468	1.00152
34	M	0	135	1	1.00726
34	P	495	2865	0.844911	0.846443
34	Q	7	168	0.95761	0.963303
34	R	101	399	0.788066	0.7875
34	S	0	99
34	T	0	524	1	1.00726
34	V	0	1248	1	1.00726
34	W	1	174	0.993931	1.00097
34	Y	0	102	1	1.00726
35	*	5617	170	0.0276984	-0.000935008
35	A	8	818	0.989717	0.996595
35	C	0	542	1	1.00726
35	D	0	591	1	1.00726
35	E	0	156	1	1.00726
35	F	0	206	1	1.00726
35	G	0	793	1	1.00726
35	H	7	542	0.986465	0.993223
35	I	0	234	1	1.00726
35	K	4	404	0.989591	0.996465
35	L	0	615	1	1.00726
35	M	0	396	1	1.00726
35	N	0	203	1	1.00726
35	P	506	0	0	-0.0296557
35	Q	5	393	0.986664	0.99343
35	R	23	812	0.970786	0.976966
35	S	5	736	0.992834	0.999828
35	T	0	159	1	1.00726
35	W	0	223	1	1.00726
35	Y	0	204	1	1.00726
36	*	1999	1	0.000470644	-0.0291677
36	A	3	4576	0.999304	1.00654
36	C	68	2186	0.968009	0.974086
36	D	4596	37	0.0075206	-0.0218576
36	E	5618	0	0	-0.0296557
36	F	7838	461	0.0524571	0.0247375
36	G	10342	348	0.0307003	0.00217765
36	H	14508	462	0.0291017	0.00052002
36	I	0	1137	1	1.00726
36	K	5281	372	0.0621807	0.03482
36	L	11	3487	0.99666	1.00379
36	M	197	3708	0.946572	0.951858
36	N	2962	1	0.000317677	-0.0293263
36	P	4973	261	0.047075	0.0191567
36	Q	5551	667	0.101608	0.075703
36	R	7050	503	0.0629304	0.0355973
36	S	6609	2595	0.26985	0.250155
36	T	39	3395	0.987943	0.994756
36	W	4991	0	0	-0.0296557
36	Y	7413	0	0	-0.0296557
37	*	1571	0	0	-0.0296557
37	A	126	864	0.86585	0.868156
37	C	0	60
37	D	130	5179	0.974025	0.980324
37	E	0	798	1	1.00726
37	F	0	467	1	1.00726
37	G	23	851	0.972088	0.978316
37	H	0	320	1	1.00726
37	I	0	149	1	1.00726
37	K	0	1005	1	1.00726
37	L	0	264	1	1.00726
37	M	0	1012	1	1.00726
37	N	19	2052	0.990259	0.997157
37	P	2439	0	0	-0.0296557
37	Q	23	96	0.797108	0.796876
37	R	0	918	1	1.00726
37	S	0	311	1	1.00726
37	T	0	122	1	1.00726
37	W	0	228	1	1.00726
38	*	3483	0	0	-0.0296557
38	A	0	129	1	1.00726
38	D	1730	77	0.0402097	0.012038
38	E	2865	0	0	-0.0296557
38	F	0	1060	1	1.00726
38	G	0	1201	1	1.00726
38	H	77	410	0.833663	0.834781
38	I	24	796	0.968962	0.975074
38	K	1135	7	0.00577162	-0.0236711
38	L	379	472	0.539643	0.529907
38	M	0	1072	1	1.00726
38	N	0	2747	1	1.00726
38	Q	0	2832	1	1.00726
38	R	1196	369	0.22505	0.203701
38	T	0	542	1	1.00726
38	V	0	1530	1	1.00726
38	W	5197	96	0.01709	-0.011935
38	Y	760	272	0.251985	0.23163
39	*	4548	0	0	-0.0296557
39	A	0	1474	1	1.00726
39	C	0	1326	1	1.00726
39	D	7610	794	0.0894254	0.0630703
39	E	2624	0	0	-0.0296557
39	F	5934	0	0	-0.0296557
39	G	91	5229	0.981847	0.988435
39	H	8190	666	0.0710999	0.0440684
39	I	5325	18	0.00317163	-0.0263671
39	K	5158	98	0.0175694	-0.0114379
39	L	9980	1015	0.0873658	0.0609347
39	M	7138	147	0.0190157	-0.0099382
39	N	265	1556	0.846785	0.848387
39	Q	2546	0	0	-0.0296557
39	R	11393	79	0.00648445	-0.022932
39	S	693	14567	0.951889	0.957372
39	T	183	5106	0.96332	0.969224
39	V	66	10278	0.993224	1.00023
39	W	5941	0	0	-0.0296557
39	Y	7576	235	0.0283687	-0.000240024
40	*	8860	96	0.0100958	-0.0191873
40	A	6951	1055	0.125003	0.0999612
40	C	22074	1326	0.0535162	0.0258357
40	D	11339	361	0.029095	0.000513141
40	E	9987	6573	0.382524	0.366987
40	F	6528	552	0.073724	0.0467893
40	G	21365	634	0.0271726	-0.00148021
40	H	14005	572	0.0370203	0.0087309
40	I	7840	486	0.0551316	0.0275108
40	K	9894	1650	0.135675	0.111027
40	L	12713	145	0.0106216	-0.0186421
40	M	7801	487	0.0554997	0.0278924
40	N	11983	311	0.0238464	-0.00492922
40	P	5829	54	0.00864447	-0.0206922
40	Q	8273	193	0.0214867	-0.00737596
40	S	9545	456	0.0430324	0.0149649
40	T	7472	69	0.00861714	-0.0207206
40	V	15240	700	0.041442	0.0133159
40	W	13897	1702	0.103363	0.0775222
40	Y	5615	93	0.0153506	-0.0137386
41	*	5517	64	0.0108012	-0.0184559
41	A	9846	280	0.0260697	-0.00262387
41	C	8582	77	0.00837451	-0.0209721
41	D	12772	1337	0.0896951	0.06335
41	E	12888	365	0.0259652	-0.00273222
41	F	12793	364	0.0260832	-0.00260988
41	G	10635	587	0.0493871	0.0215542
41	I	13023	260	0.0184453	-0.0105296
41	K	6458	51	0.00737845	-0.022005
41	L	10474	108	0.00961227	-0.0196887
41	M	12720	226	0.0164486	-0.0126001
41	N	13407	702	0.0469701	0.019048
41	P	14608	931	0.0565936	0.0290267
41	Q	8425	97	0.0107209	-0.0185392
41	R	10702	402	0.0341492	0.00575387
41	S	14804	98	0.0061924	-0.0232348
41	T	7530	223	0.0271193	-0.00153547
41	V	7156	923	0.108262	0.0826026
41	W	16087	244	0.0140756	-0.0150606
41	Y	10702	251	0.0215991	-0.00725947
42	*	7045	160	0.0209297	-0.00795359
42	A	0	4216	1	1.00726
42	C	31	7850	0.995822	1.00293
42	D	17241	552	0.0292544	0.000678427
42	E	9408	737	0.0686724	0.0415513
42	F	847	23656	0.963355	0.96926
42	G	30	13238	0.997598	1.00477
42	H	15098	1382	0.079324	0.0525961
42	I	0	3335	1	1.00726
42	K	8756	288	0.0300299	0.00148257
42	L	70	3682	0.980202	0.98673
42	M	140	17139	0.991396	0.998337
42	N	4435	11900	0.71636	0.713146
42	P	18176	403	0.0204431	-0.00845816
42	Q	10573	2252	0.167003	0.143511
42	R	11650	356	0.0279588	-0.000665035
42	S	131	5656	0.975984	0.982356
42	T	0	15381	1	1.00726
42	W	11967	896	0.0658348	0.038609
42	Y	7358	388	0.0472872	0.0193768
43	*	14973	1198	0.0700363	0.0429656
43	A	8	2845	0.997021	1.00417
43	C	206	1698	0.885826	0.888869
43	D	8859	4442	0.320633	0.302812
43	E	973	14997	0.935516	0.940394
43	F	0	4017	1	1.00726
43	G	37	9494	0.995877	1.00298
43	H	361	3302	0.895937	0.899353
43	K	498	17153	0.970078	0.976232
43	L	0	4150	1	1.00726
43	M	9	1832	0.994808	1.00187
43	N	221	16054	0.985586	0.992312
43	P	5409	2548	0.307189	0.288872
43	Q	60	10245	0.993816	1.00085
43	R	1402	19587	0.929329	0.933978
43	S	14	6893	0.997847	1.00503
43	T	6	2601	0.997555	1.00472
43	V	8	1103	0.992353	0.999329
43	W	666	25233	0.972724	0.978975
43	Y	43	5895	0.99231	0.999285
44	*	15654	128	0.00763773	-0.0217361
44	A	24	3185	0.992058	0.999023
44	D	1577	17546	0.912836	0.916876
44	E	6035	15883	0.712414	0.709055
44	F	867	15532	0.944016	0.949208
44	G	0	3746	1	1.00726
44	H	1296	13651	0.908378	0.912254
44	I	0	3884	1	1.00726
44	K	2756	24307	0.892492	0.895781
44	L	0	1164	1	1.00726
44	M	51	9278	0.994194	1.00124
44	N	19	4499	0.995533	1.00263
44	P	2219	21815	0.902473	0.90613
44	Q	688	8452	0.920403	0.924723
44	R	1313	7866	0.849374	0.851071
44	S	0	2196	1	1.00726
44	T	0	3727	1	1.00726
44	V	25	3064	0.991406	0.998347
44	W	579	18370	0.967599	0.973661
44	Y	1693	13419	0.881805	0.8847
45	*	17376	607	0.0318345	0.00335373
45	A	1	1231	0.999138	1.00636
45	C	0	661	1	1.00726
45	D	0	1153	1	1.00726
45	E	0	1063	1	1.00726
45	F	0	1526	1	1.00726
45	G	0	1142	1	1.00726
45	H	6	670	0.990576	0.997486
45	I	0	2241	1	1.00726
45	K	0	423	1	1.00726
45	L	5	1511	0.996497	1.00363
45	M	10	758	0.986178	0.992926
45	N	0	924	1	1.00726
45	P	0	5698	1	1.00726
45	Q	14	1147	0.987199	0.993984
45	R	0	542	1	1.00726
45	S	0	1083	1	1.00726
45	V	0	512	1	1.00726
45	W	19	6140	0.996723	1.00386
45	Y	36	1850	0.979745	0.986255
46	*	11698	459	0.0356172	0.00727607
46	C	0	620	1	1.00726
46	D	72	2071	0.96438	0.970324
46	E	0	1187	1	1.00726
46	F	0	293	1	1.00726
46	G	0	770	1	1.00726
46	H	0	1297	1	1.00726
46	I	0	188	1	1.00726
46	K	0	876	1	1.00726
46	L	0	133	1	1.00726
46	M	0	583	1	1.00726
46	N	5	1582	0.996653	1.00379
46	P	0	519	1	1.00726
46	Q	0	688	1	1.00726
46	R	62	308	0.823818	0.824572
46	T	0	424	1	1.00726
46	V	7	393	0.981428	0.988001
46	W	0	383	1	1.00726
46	Y	0	390	1	1.00726
47	*	4776	0	0	-0.0296557
47	A	0	146	1	1.00726
47	C	1	1439	0.999262	1.00649
47	F	249	1485	0.848795	0.850471
47	G	0	378	1	1.00726
47	H	12	588	0.978778	0.985253
47	I	0	649	1	1.00726
47	K	3	954	0.99667	1.00381
47	L	0	611	1	1.00726
47	M	0	892	1	1.00726
47	N	6	134	0.95459	0.960172
47	P	5	2324	0.997719	1.00489
47	Q	0	972	1	1.00726
47	R	0	445	1	1.00726
47	S	4	880	0.995194	1.00228
47	T	19	600	0.967452	0.973509
47	V	0	1160	1	1.00726
47	W	0	302	1	1.00726
47	Y	0	234	1	1.00726
48	*	3293	28	0.00793988	-0.0214228
48	A	0	999	1	1.00726
48	C	0	391	1	1.00726
48	E	0	245	1	1.00726
48	F	11	4226	0.997242	1.0044
48	G	0	785	1	1.00726
48	H	0	840	1	1.00726
48	I	0	1949	1	1.00726
48	K	0	1380	1	1.00726
48	L	21	1952	0.9887	0.995541
48	M	0	2076	1	1.00726
48	N	0	478	1	1.00726
48	P	27	3185	0.991074	0.998003
48	Q	0	78
48	R	0	3077	1	1.00726
48	S	0	374	1	1.00726
48	T	0	857	1	1.00726
48	V	0	413	1	1.00726
48	W	0	509	1	1.00726
48	Y	0	1624	1	1.00726
49	*	11493	1038	0.0783501	0.0515862
49	A	0	2731	1	1.00726
49	C	23	2863	0.991537	0.998483
49	D	228	11203	0.978836	0.985313
49	E	117	6479	0.981176	0.987739
49	F	6	2478	0.997434	1.0046
49	G	46	5623	0.991384	0.998324
49	H	0	4563	1	1.00726
49	I	33	4684	0.992571	0.999555
49	K	0	1455	1	1.00726
49	L	14	261	0.946085	0.951353
49	N	73	4021	0.981077	0.987637
49	P	134	3693	0.962882	0.96877
49	Q	0	4083	1	1.00726
49	R	83	3533	0.975649	0.982008
49	S	16	3416	0.995048	1.00212
49	T	9	1131	0.991617	0.998566
49	V	119	350	0.734636	0.732098
49	W	114	13590	0.991167	0.998099
49	Y	18	4680	0.99593	1.00304
50	*	13200	322	0.0224457	-0.00638164
50	A	0	221	1	1.00726
50	C	19	154	0.884114	0.887094
50	D	0	391	1	1.00726
50	E	0	900	1	1.00726
50	F	0	92
50	G	0	231	1	1.00726
50	H	0	259	1	1.00726
50	I	110	766	0.86763	0.870002
50	K	0	130	1	1.00726
50	M	0	331	1	1.00726
50	N	0	127	1	1.00726
50	P	0	207	1	1.00726
50	Q	0	97
50	R	44	132	0.738479	0.736082
50	S	5	47
50	T	0	245	1	1.00726
50	V	0	259	1	1.00726
50	W	0	95
50	Y	0	99
51	*	19348	411	0.0196028	-0.00932947
51	A	0	423	1	1.00726
51	C	0	659	1	1.00726
51	D	14	1369	0.989252	0.996114
51	E	0	1077	1	1.00726
51	F	56	2179	0.973422	0.979699
51	G	0	3778	1	1.00726
51	H	0	1234	1	1.00726
51	I	10	3810	0.997219	1.00438
51	K	0	1050	1	1.00726
51	L	6	3555	0.99821	1.0054
51	M	0	759	1	1.00726
51	P	4555	20583	0.809645	0.809876
51	Q	58	1747	0.96593	0.971931
51	R	0	1294	1	1.00726
51	S	0	1734	1	1.00726
51	T	0	3545	1	1.00726
51	V	30	3643	0.991327	0.998265
51	W	0	1898	1	1.00726
51	Y	53	1791	0.969519	0.975652
52	*	11507	192	0.0154625	-0.0136225
52	A	45	7104	0.993315	1.00033
52	C	11	5714	0.997959	1.00514
52	D	72	14185	0.994636	1.0017
52	E	56	12417	0.995231	1.00231
52	F	48	9231	0.994506	1.00156
52	G	26	6054	0.995458	1.00255
52	H	308	9633	0.967147	0.973193
52	I	159	8751	0.981062	0.987622
52	K	195	7826	0.974211	0.980517
52	L	24	8729	0.997087	1.00424
52	M	33	5677	0.993862	1.00089
52	N	123	20326	0.993612	1.00063
52	Q	1	9727	0.999891	1.00715
52	R	378	10429	0.962921	0.96881
52	S	0	4051	1	1.00726
52	T	80	8405	0.989989	0.996878
52	V	97	6373	0.984087	0.990758
52	W	79	11368	0.992671	0.999659
52	Y	81	9043	0.990574	0.997484
53	*	7553	64	0.00791261	-0.0214511
53	A	0	211	1	1.00726
53	C	11	1539	0.992464	0.999444
53	D	0	947	1	1.00726
53	E	16	313	0.948489	0.953846
53	F	10	2160	0.995106	1.00218
53	G	0	5480	1	1.00726
53	H	10	581	0.982043	0.988638
53	I	0	1036	1	1.00726
53	K	0	832	1	1.00726
53	L	7	1255	0.994109	1.00115
53	M	0	669	1	1.00726
53	P	0	905	1	1.00726
53	Q	0	764	1	1.00726
53	R	0	642	1	1.00726
53	S	70	1765	0.959568	0.965334
53	T	0	2900	1	1.00726
53	V	32	1018	0.967683	0.973749
53	W	0	1502	1	1.00726
53	Y	73	864	0.91763	0.921848
54	*	12405	241	0.0179581	-0.0110349
54	A	5986	15344	0.706981	0.703421
54	C	3755	20855	0.839427	0.840757
54	D	8170	8496	0.494648	0.48325
54	E	8657	12488	0.575875	0.567476
54	F	0	4043	1	1.00726
54	G	5200	5783	0.51143	0.500652
54	H	121	13821	0.990785	0.997703
54	I	1711	12993	0.877267	0.879994
54	K	3821	7317	0.643171	0.637256
54	L	1651	23614	0.930857	0.935562
54	M	75	13027	0.993921	1.00095
54	N	6426	9411	0.579566	0.571303
54	P	1856	12291	0.861751	0.863905
54	Q	6327	8569	0.560401	0.55143
54	R	10433	10942	0.496775	0.485456
54	S	2825	5636	0.652519	0.646949
54	T	4368	10561	0.69473	0.690718
54	V	3460	17943	0.829967	0.830948
54	W	49	6484	0.992035	0.999
55	*	14486	233	0.0149139	-0.0141914
55	A	138	1438	0.907478	0.91132
55	C	9	1139	0.991675	0.998626
55	D	21	1490	0.985247	0.991961
55	F	119	1491	0.921835	0.926207
55	G	0	1099	1	1.00726
55	H	8	775	0.989152	0.99601
55	I	0	952	1	1.00726
55	K	0	348	1	1.00726
55	L	0	908	1	1.00726
55	M	0	484	1	1.00726
55	N	0	1189	1	1.00726
55	P	0	968	1	1.00726
55	Q	0	1307	1	1.00726
55	R	119	1025	0.8902	0.893405
55	S	11	1078	0.989275	0.996138
55	T	0	1355	1	1.00726
55	V	0	1511	1	1.00726
55	W	0	284	1	1.00726
55	Y	35	789	0.954993	0.96059
56	*	13132	641	0.0439266	0.0158922
56	A	5	857	0.99384	1.00087
56	C	29	1223	0.975427	0.981778
56	E	18	776	0.975949	0.98232
56	F	0	539	1	1.00726
56	G	345	1049	0.741065	0.738764
56	H	0	1202	1	1.00726
56	I	6	915	0.993082	1.00008
56	K	6	569	0.988921	0.995771
56	L	2	847	0.997498	1.00466
56	M	0	601	1	1.00726
56	N	7	787	0.990639	0.997552
56	P	4	4315	0.999016	1.00624
56	Q	0	1029	1	1.00726
56	R	0	816	1	1.00726
56	S	0	1088	1	1.00726
56	T	0	299	1	1.00726
56	V	849	1035	0.534336	0.524404
56	W	4	335	0.987473	0.994269
56	Y	0	554	1	1.00726
57	*	16886	565	0.0305326	0.00200382
57	A	30	6055	0.994764	1.00183
57	C	24	3535	0.992839	0.999833
57	D	75	7619	0.98965	0.996526
57	E	0	3886	1	1.00726
57	F	67	9045	0.992192	0.999162
57	G	6	7970	0.999201	1.00643
57	H	377	3296	0.891648	0.894906
57	I	1	1028	0.998968	1.00619
57	K	0	4796	1	1.00726
57	M	8	2535	0.996658	1.00379
57	N	51	1628	0.96779	0.973859
57	P	142	6383	0.976911	0.983317
57	Q	0	4603	1	1.00726
57	R	34	9196	0.996087	1.0032
57	S	0	2081	1	1.00726
57	T	4	4138	0.998974	1.00619
57	V	12	1987	0.993625	1.00065
57	W	0	18838	1	1.00726
57	Y	20	4859	0.995646	1.00274
58	*	13185	508	0.0349963	0.00663223
58	A	0	2876	1	1.00726
58	C	12	2592	0.995106	1.00218
58	D	37	8591	0.995445	1.00254
58	E	0	2624	1	1.00726
58	F	0	345	1	1.00726
58	G	23	10993	0.997782	1.00496
58	H	0	636	1	1.00726
58	I	0	861	1	1.00726
58	K	14	6358	0.997666	1.00484
58	M	0	3498	1	1.00726
58	N	0	1519	1	1.00726
58	P	612	17536	0.964248	0.970186
58	Q	5	2885	0.998162	1.00535
58	R	0	3649	1	1.00726
58	S	0	2400	1	1.00726
58	T	0	3582	1	1.00726
58	V	4	1658	0.997443	1.00461
58	W	89	2121	0.957323	0.963005
58	Y	295	2367	0.883074	0.886016
59	*	10578	451	0.0385828	0.0103512
59	A	0	503	1	1.00726
59	C	0	1624	1	1.00726
59	D	0	793	1	1.00726
59	E	83	2165	0.960864	0.966678
59	F	0	239	1	1.00726
59	G	111	2584	0.956354	0.962001
59	H	0	631	1	1.00726
59	K	0	1072	1	1.00726
59	L	20	1648	0.987271	0.994059
59	M	4	1063	0.996018	1.00313
59	N	0	1479	1	1.00726
59	P	0	1901	1	1.00726
59	Q	0	748	1	1.00726
59	R	0	573	1	1.00726
59	S	0	456	1	1.00726
59	T	86	1095	0.922986	0.927401
59	V	7	1384	0.994655	1.00172
59	W	0	789	1	1.00726
59	Y	0	1155	1	1.00726
60	*	8425	592	0.0620365	0.0346705
60	A	0	1689	1	1.00726
60	C	20	383	0.947438	0.952756
60	D	8	1321	0.993607	1.00063
60	E	0	1151	1	1.00726
60	F	18	1128	0.983329	0.989972
60	G	0	381	1	1.00726
60	H	2	1027	0.997935	1.00512
60	I	0	542	1	1.00726
60	K	0	626	1	1.00726
60	L	0	1504	1	1.00726
60	M	58	1905	0.968667	0.974769
60	N	0	1422	1	1.00726
60	P	0	1840	1	1.00726
60	Q	0	1115	1	1.00726
60	S	52	1588	0.96638	0.972398
60	T	0	972	1	1.00726
60	V	12	1212	0.989591	0.996465
60	W	8	1257	0.993284	1.00029
60	Y	0	920	1	1.00726
61	*	14748	367	0.0228869	-0.0059241
61	A	12	3641	0.996511	1.00364
61	C	41	1508	0.971926	0.978148
61	D	91	10102	0.99052	0.997429
61	E	0	2161	1	1.00726
61	F	5	1483	0.996431	1.00356
61	G	7	5621	0.998679	1.00589
61	H	0	1794	1	1.00726
61	I	0	1298	1	1.00726
61	L	0	1414	1	1.00726
61	M	12	2321	0.994537	1.00159
61	N	9	2415	0.996056	1.00317
61	P	166	10709	0.983798	0.990459
61	Q	6	1524	0.995835	1.00294
61	R	107	1293	0.919187	0.923462
61	S	0	3379	1	1.00726
61	T	8	2292	0.996305	1.00343
61	V	0	1529	1	1.00726
61	W	29	1161	0.974149	0.980453
61	Y	7	2245	0.996698	1.00383
62	*	14921	450	0.0276037	-0.00103322
62	A	19	1104	0.982044	0.98864
62	C	0	838	1	1.00726
62	D	0	166	1	1.00726
62	E	0	848	1	1.00726
62	F	0	708	1	1.00726
62	G	14	841	0.982622	0.989238
62	H	0	684	1	1.00726
62	I	8	709	0.988154	0.994975
62	K	0	1519	1	1.00726
62	L	0	1206	1	1.00726
62	M	14	644	0.977426	0.983851
62	N	0	858	1	1.00726
62	P	0	3020	1	1.00726
62	Q	0	693	1	1.00726
62	R	0	140	1	1.00726
62	T	0	496	1	1.00726
62	V	0	1067	1	1.00726
62	W	8	1037	0.991871	0.998829
62	Y	0	1480	1	1.00726
63	*	14629	933	0.0566315	0.0290659
63	A	46	2250	0.978741	0.985215
63	C	7	2669	0.997221	1.00438
63	D	1	913	0.998838	1.00605
63	E	7	4397	0.998312	1.00551
63	F	11	2238	0.994805	1.00187
63	G	0	3124	1	1.00726
63	H	10	1664	0.993656	1.00068
63	I	32	1378	0.975923	0.982292
63	K	5	1888	0.997194	1.00435
63	L	0	2302	1	1.00726
63	M	26	4498	0.993896	1.00093
63	P	100	2242	0.954757	0.960345
63	Q	0	2166	1	1.00726
63	R	2	1503	0.998588	1.00579
63	S	0	1188	1	1.00726
63	T	13	2286	0.993995	1.00103
63	V	0	2443	1	1.00726
63	W	36	4189	0.990952	0.997877
63	Y	0	5879	1	1.00726
64	*	10440	246	0.0216979	-0.00715703
64	A	0	1588	1	1.00726
64	C	0	894	1	1.00726
64	D	0	612	1	1.00726
64	E	0	809	1	1.00726
64	F	3	1491	0.997867	1.00505
64	G	0	1638	1	1.00726
64	I	13	613	0.977966	0.984411
64	K	0	1309	1	1.00726
64	L	0	284	1	1.00726
64	M	0	1178	1	1.00726
64	N	0	471	1	1.00726
64	P	2	1250	0.998303	1.0055
64	Q	0	948	1	1.00726
64	R	1556	769	0.317493	0.299556
64	S	0	1087	1	1.00726
64	T	0	998	1	1.00726
64	V	0	1190	1	1.00726
64	W	147	861	0.846463	0.848053
64	Y	0	678	1	1.00726
65	*	11038	378	0.0312272	0.002724
65	A	7	2129	0.996519	1.00365
65	C	0	852	1	1.00726
65	D	0	964	1	1.00726
65	E	0	1082	1	1.00726
65	F	0	1849	1	1.00726
65	G	21	1472	0.98507	0.991777
65	H	0	432	1	1.00726
65	I	0	2483	1	1.00726
65	K	0	3570	1	1.00726
65	L	0	1616	1	1.00726
65	M	0	574	1	1.00726
65	P	33	3124	0.988902	0.995751
65	Q	0	670	1	1.00726
65	R	0	3005	1	1.00726
65	S	0	613	1	1.00726
65	T	1530	1477	0.476071	0.463987
65	V	0	1029	1	1.00726
65	W	0	1490	1	1.00726
65	Y	0	1250	1	1.00726
66	*	13308	87	0.00611578	-0.0233142
66	A	4589	10007	0.672406	0.66757
66	C	131	20531	0.993267	1.00028
66	D	12079	154	0.0118582	-0.0173599
66	E	15385	2407	0.128359	0.103441
66	G	10270	864	0.0733764	0.0464289
66	H	8569	11073	0.5488	0.539401
66	I	12	4323	0.99706	1.00421
66	K	13248	8479	0.375946	0.360167
66	L	8	5011	0.998307	1.0055
66	M	2	3377	0.999371	1.00661
66	N	11507	1216	0.0904687	0.0641521
66	P	2648	16839	0.856848	0.858822
66	Q	8699	1704	0.155675	0.131765
66	R	5378	1764	0.235904	0.214955
66	S	6736	3891	0.352211	0.335555
66	T	205	12269	0.982558	0.989173
66	V	48	10168	0.99501	1.00208
66	W	20	2054	0.989761	0.996642
66	Y	8	2613	0.996758	1.0039
67	*	12411	143	0.0107289	-0.0185309
67	A	48	1498	0.967078	0.973121
67	C	9	1819	0.994771	1.00184
67	D	53	960	0.944596	0.949809
67	E	0	1465	1	1.00726
67	F	0	1024	1	1.00726
67	G	0	1261	1	1.00726
67	H	0	1436	1	1.00726
67	I	0	454	1	1.00726
67	K	6	2089	0.996958	1.0041
67	M	0	1496	1	1.00726
67	N	4	732	0.994228	1.00127
67	P	1201	3078	0.706944	0.703384
67	Q	0	1767	1	1.00726
67	R	0	840	1	1.00726
67	S	49	2118	0.976011	0.982384
67	T	4	1344	0.996848	1.00399
67	V	0	890	1	1.00726
67	W	0	1320	1	1.00726
67	Y	36	1770	0.978849	0.985326
68	*	9305	318	0.0311652	0.00265973
68	A	0	2659	1	1.00726
68	C	0	1090	1	1.00726
68	D	17915	722	0.0365477	0.0082409
68	E	14681	466	0.0290104	0.00042544
68	F	7054	1983	0.209239	0.187306
68	G	18682	5526	0.217783	0.196166
68	H	15268	423	0.0254148	-0.00330286
68	I	29	847	0.964902	0.970864
68	K	10169	280	0.0252625	-0.0034608
68	L	18	2205	0.991402	0.998343
68	M	88	7552	0.987772	0.994579
68	N	14693	556	0.0343933	0.00600699
68	P	110	11189	0.989663	0.99654
68	Q	12007	90	0.0070059	-0.0223913
68	R	16866	343	0.0187826	-0.0101799
68	S	3377	9696	0.729915	0.727202
68	T	0	2839	1	1.00726
68	W	7849	626	0.0698285	0.04275
68	Y	27752	715	0.0236764	-0.00510551
69	*	16884	535	0.0289617	0.000374916
69	A	16	706	0.976489	0.982879
69	C	26	498	0.947448	0.952766
69	D	11	1348	0.991405	0.998346
69	E	0	1091	1	1.00726
69	F	19	953	0.979258	0.985751
69	G	0	1286	1	1.00726
69	H	0	359	1	1.00726
69	I	0	922	1	1.00726
69	K	17	516	0.966182	0.972192
69	L	0	418	1	1.00726
69	M	0	807	1	1.00726
69	N	0	1131	1	1.00726
69	P	1738	9773	0.841089	0.84248
69	R	11	1134	0.9898	0.996681
69	S	1	1021	0.998961	1.00618
69	T	8	563	0.985128	0.991837
69	V	0	333	1	1.00726
69	W	97	872	0.89431	0.897666
69	Y	0	774	1	1.00726
70	*	11269	387	0.0313126	0.00281254
70	C	1745	484	0.207024	0.185009
70	D	257	978	0.781751	0.780952
70	E	3	1924	0.998346	1.00554
70	F	0	752	1	1.00726
70	G	0	1130	1	1.00726
70	H	11	1120	0.989673	0.996551
70	I	1	648	0.998363	1.00556
70	K	0	711	1	1.00726
70	L	0	621	1	1.00726
70	M	0	729	1	1.00726
70	N	0	550	1	1.00726
70	P	0	3165	1	1.00726
70	Q	0	1926	1	1.00726
70	R	0	951	1	1.00726
70	S	0	722	1	1.00726
70	T	67	408	0.851452	0.853227
70	V	0	1236	1	1.00726
70	W	0	1027	1	1.00726
70	Y	6	1548	0.995899	1.00301
71	*	7968	215	0.0247689	-0.00397268
71	A	0	989	1	1.00726
71	C	0	706	1	1.00726
71	D	4	1629	0.997398	1.00456
71	E	6	1365	0.995352	1.00244
71	F	27	1868	0.984876	0.991576
71	H	0	1309	1	1.00726
71	I	71	1350	0.947082	0.952387
71	K	0	1054	1	1.00726
71	L	0	1536	1	1.00726
71	M	0	965	1	1.00726
71	N	10	1407	0.992506	0.999487
71	P	12	2577	0.995077	1.00215
71	Q	0	912	1	1.00726
71	R	24	656	0.962586	0.968463
71	S	9	1419	0.993307	1.00032
71	T	120	1852	0.935595	0.940476
71	V	10	953	0.988975	0.995826
71	W	59	2531	0.975833	0.982199
71	Y	14	1387	0.98939	0.996257
72	*	14482	202	0.0129589	-0.0162186
72	A	0	827	1	1.00726
72	C	19	1212	0.983618	0.990272
72	D	3	605	0.994759	1.00182
72	E	0	993	1	1.00726
72	F	0	551	1	1.00726
72	G	0	1059	1	1.00726
72	H	0	614	1	1.00726
72	I	9	1405	0.993241	1.00025
72	K	0	815	1	1.00726
72	L	19	1600	0.987541	0.99434
72	M	8	1675	0.994951	1.00202
72	P	0	837	1	1.00726
72	Q	0	451	1	1.00726
72	R	0	913	1	1.00726
72	S	0	897	1	1.00726
72	T	0	915	1	1.00726
72	V	0	1590	1	1.00726
72	W	11	1600	0.992749	0.99974
72	Y	0	1573	1	1.00726
73	*	10658	669	0.0557866	0.0281899
73	A	7	1420	0.99479	1.00186
73	C	0	1835	1	1.00726
73	D	8	1881	0.995502	1.00259
73	E	1	328	0.996771	1.00391
73	F	13	1265	0.9892	0.99606
73	G	4	2336	0.998184	1.00538
73	H	0	667	1	1.00726
73	I	0	659	1	1.00726
73	K	0	1010	1	1.00726
73	L	169	926	0.837595	0.838857
73	M	0	582	1	1.00726
73	N	3	1157	0.997253	1.00441
73	P	448	5736	0.92338	0.92781
73	Q	0	1245	1	1.00726
73	R	0	714	1	1.00726
73	S	0	1126	1	1.00726
73	T	0	730	1	1.00726
73	W	0	255	1	1.00726
73	Y	0	1107	1	1.00726
74	*	14510	328	0.020834	-0.00805281
74	A	2	334	0.993679	1.0007
74	C	0	856	1	1.00726
74	D	4	1052	0.995977	1.00309
74	E	18	1851	0.989774	0.996655
74	F	17	1317	0.986472	0.993231
74	G	0	1712	1	1.00726
74	H	0	861	1	1.00726
74	I	0	1034	1	1.00726
74	K	6	946	0.993307	1.00032
74	L	0	453	1	1.00726
74	M	6	1503	0.995777	1.00288
74	N	51	588	0.915627	0.919771
74	P	0	508	1	1.00726
74	R	0	941	1	1.00726
74	S	0	1174	1	1.00726
74	T	0	506	1	1.00726
74	V	5	869	0.993924	1.00096
74	W	1	1442	0.999264	1.0065
74	Y	0	146	1	1.00726
75	*	6688	555	0.0724508	0.0454691
75	A	3	3169	0.998995	1.00622
75	C	0	2010	1	1.00726
75	D	6146	7518	0.535182	0.525281
75	E	30	17984	0.998231	1.00542
75	F	8	1547	0.994536	1.00159
75	G	34	5369	0.993317	1.00033
75	H	0	2346	1	1.00726
75	I	0	821	1	1.00726
75	K	0	990	1	1.00726
75	M	0	846	1	1.00726
75	N	23	5282	0.995395	1.00248
75	P	0	919	1	1.00726
75	Q	13	2276	0.993968	1.001
75	R	7	5582	0.998669	1.00588
75	S	0	4224	1	1.00726
75	T	4	3317	0.99872	1.00593
75	V	0	1055	1	1.00726
75	W	0	4346	1	1.00726
75	Y	20	1850	0.988645	0.995484
76	*	15032	232	0.0143191	-0.0148081
76	A	0	1441	1	1.00726
76	C	9	949	0.990025	0.996915
76	D	34	3028	0.988211	0.995035
76	E	77	1471	0.947318	0.952631
76	F	27	824	0.966359	0.972376
76	G	0	1167	1	1.00726
76	H	0	251	1	1.00726
76	I	4	819	0.994838	1.00191
76	K	17	635	0.972344	0.978582
76	L	4	1483	0.997143	1.0043
76	M	0	874	1	1.00726
76	N	0	1647	1	1.00726
76	P	0	1145	1	1.00726
76	Q	13	980	0.986103	0.992848
76	S	0	1174	1	1.00726
76	T	21	1437	0.984712	0.991406
76	V	56	871	0.936061	0.940959
76	W	7	1711	0.995672	1.00277
76	Y	51	1044	0.950661	0.956098
77	*	13002	163	0.0116625	-0.0175628
77	A	22	2654	0.99127	0.998206
77	C	0	1020	1	1.00726
77	D	97	14137	0.992763	0.999754
77	E	110	16876	0.993123	1.00013
77	F	216	17614	0.987139	0.993923
77	G	67	8587	0.991779	0.998734
77	H	57	8347	0.992797	0.99979
77	I	4	556	0.992415	0.999393
77	K	101	10732	0.990101	0.996993
77	L	0	2939	1	1.00726
77	M	0	3094	1	1.00726
77	N	22	7529	0.996905	1.00405
77	P	0	1575	1	1.00726
77	Q	128	13447	0.989988	0.996877
77	R	632	4962	0.880812	0.88367
77	S	23	6220	0.996087	1.0032
77	T	3	1525	0.997914	1.0051
77	W	296	20488	0.984883	0.991583
77	Y	141	14013	0.989423	0.996291
78	*	16707	0	0	-0.0296557
78	A	0	776	1	1.00726
78	C	0	1605	1	1.00726
78	D	0	2350	1	1.00726
78	E	52	2290	0.976444	0.982832
78	F	0	1061	1	1.00726
78	G	0	1974	1	1.00726
78	H	16	1713	0.990174	0.99707
78	K	0	1461	1	1.00726
78	L	10	1296	0.991869	0.998827
78	M	300	1751	0.846007	0.847581
78	N	0	1345	1	1.00726
78	P	2131	12840	0.850107	0.851831
78	Q	0	1926	1	1.00726
78	R	0	1276	1	1.00726
78	S	0	2432	1	1.00726
78	T	5	738	0.992854	0.999848
78	V	0	983	1	1.00726
78	W	0	1173	1	1.00726
78	Y	7	2469	0.996997	1.00414
79	*	13525	463	0.0312162	0.00271261
79	A	2	773	0.997259	1.00442
79	C	28	1386	0.978988	0.985471
79	D	0	1122	1	1.00726
79	E	0	745	1	1.00726
79	F	0	402	1	1.00726
79	H	1006	873	0.449587	0.436526
79	I	2	1840	0.998847	1.00606
79	K	0	827	1	1.00726
79	L	6	1829	0.996527	1.00366
79	M	10	1318	0.992004	0.998967
79	N	0	696	1	1.00726
79	P	5242	9630	0.633589	0.62732
79	Q	0	805	1	1.00726
79	R	9	961	0.990148	0.997043
79	S	0	1459	1	1.00726
79	T	0	1150	1	1.00726
79	V	5	1345	0.996066	1.00318
79	W	0	737	1	1.00726
79	Y	7	1082	0.993174	1.00018
80	*	12434	377	0.0277472	-0.000884425
80	A	0	2832	1	1.00726
80	C	11	1036	0.988845	0.995692
80	D	140	6086	0.976144	0.982521
80	E	8	3038	0.99721	1.00437
80	F	0	567	1	1.00726
80	G	0	2068	1	1.00726
80	I	65	989	0.934733	0.939582
80	K	14	3627	0.995916	1.00302
80	L	5	2915	0.998181	1.00537
80	M	22	1738	0.98673	0.993499
80	N	0	1105	1	1.00726
80	P	13	5896	0.997663	1.00484
80	Q	61	1788	0.965022	0.970989
80	R	44	3859	0.988032	0.994848
80	S	8	2543	0.996669	1.0038
80	T	0	1220	1	1.00726
80	V	672	630	0.468772	0.456419
80	W	0	2867	1	1.00726
80	Y	19	1743	0.988552	0.995387
81	*	10516	180	0.0158559	-0.0132147
81	A	0	1344	1	1.00726
81	C	0	556	1	1.00726
81	D	0	600	1	1.00726
81	E	0	873	1	1.00726
81	F	3	475	0.993335	1.00035
81	G	52	1267	0.958219	0.963935
81	H	10	646	0.98382	0.990481
81	I	5	580	0.990924	0.997848
81	K	0	371	1	1.00726
81	L	72	345	0.818518	0.819077
81	M	0	710	1	1.00726
81	N	82	1397	0.9413	0.946392
81	P	3	1824	0.998256	1.00545
81	Q	11	892	0.987068	0.993849
81	R	0	725	1	1.00726
81	T	235	723	0.743318	0.7411
81	V	0	640	1	1.00726
81	W	0	986	1	1.00726
81	Y	0	712	1	1.00726
82	*	14178	183	0.0120033	-0.0172094
82	A	24	4748	0.994658	1.00172
82	C	203	5014	0.958761	0.964496
82	D	14	3185	0.995352	1.00244
82	E	20	10251	0.997932	1.00511
82	F	25	4111	0.993581	1.0006
82	G	16	5336	0.996824	1.00397
82	H	9	4887	0.998047	1.00523
82	I	12	5477	0.997678	1.00485
82	K	17	7532	0.997608	1.00478
82	L	19	4558	0.995591	1.00269
82	N	0	3184	1	1.00726
82	P	0	4129	1	1.00726
82	Q	4	3431	0.998763	1.00598
82	R	67	8914	0.992078	0.999044
82	S	43	6758	0.993285	1.0003
82	T	0	5210	1	1.00726
82	V	0	4718	1	1.00726
82	W	90	13836	0.993137	1.00014
82	Y	60	8405	0.992473	0.999453
83	*	10875	219	0.0186024	-0.0103667
83	A	0	851	1	1.00726
83	C	3	2032	0.998434	1.00563
83	D	0	385	1	1.00726
83	E	0	661	1	1.00726
83	F	32	768	0.95761	0.963303
83	G	79	1073	0.927454	0.932035
83	H	0	447	1	1.00726
83	I	0	893	1	1.00726
83	K	0	753	1	1.00726
83	L	86	871	0.90506	0.908814
83	M	0	366	1	1.00726
83	N	0	862	1	1.00726
83	P	0	1498	1	1.00726
83	R	11	1285	0.990987	0.997913
83	S	11	853	0.986485	0.993244
83	T	7	953	0.992257	0.999229
83	V	22	695	0.967464	0.973521
83	W	29	1320	0.977192	0.983608
83	Y	0	738	1	1.00726
84	*	16130	569	0.0321367	0.0036671
84	A	0	830	1	1.00726
84	C	0	1530	1	1.00726
84	D	1	979	0.998916	1.00613
84	E	0	760	1	1.00726
84	F	4	731	0.99422	1.00127
84	G	14	753	0.98063	0.987173
84	H	0	373	1	1.00726
84	I	0	2255	1	1.00726
84	K	10	1037	0.989859	0.996743
84	L	13	874	0.984443	0.991128
84	M	0	729	1	1.00726
84	P	2291	12302	0.834828	0.835988
84	Q	39	603	0.935705	0.94059
84	R	14	666	0.978155	0.984607
84	S	0	534	1	1.00726
84	T	9	2049	0.995355	1.00244
84	V	5	2289	0.997685	1.00486
84	W	0	1419	1	1.00726
84	Y	0	324	1	1.00726
85	*	11527	69	0.00560276	-0.0238462
85	A	0	747	1	1.00726
85	D	6899	16184	0.688284	0.684035
85	E	10035	3552	0.249908	0.229476
85	F	315	11120	0.970784	0.976964
85	G	32	3867	0.991285	0.998222
85	H	0	6153	1	1.00726
85	I	213	17897	0.987514	0.994311
85	K	0	1797	1	1.00726
85	L	1883	11490	0.85171	0.853494
85	M	0	12677	1	1.00726
85	N	106	7111	0.98441	0.991093
85	P	191	7362	0.973176	0.979444
85	Q	263	9838	0.972383	0.978622
85	R	41	9975	0.995652	1.00275
85	S	0	1211	1	1.00726
85	T	10	1656	0.993625	1.00065
85	V	123	13730	0.990572	0.997483
85	W	8059	310	0.0349417	0.00657558
85	Y	227	12728	0.981405	0.987977
86	*	8892	196	0.0203258	-0.00857974
86	A	0	349	1	1.00726
86	C	105	1670	0.937385	0.942331
86	D	0	1735	1	1.00726
86	E	100	1681	0.940556	0.94562
86	F	0	834	1	1.00726
86	G	4	1057	0.995996	1.00311
86	H	3	611	0.994811	1.00188
86	I	0	505	1	1.00726
86	K	0	1842	1	1.00726
86	L	0	329	1	1.00726
86	M	2279	303	0.111224	0.0856738
86	N	4	586	0.9928	0.999793
86	P	11460	381	0.0303436	0.00180785
86	Q	19	2235	0.991049	0.997977
86	R	32	956	0.965659	0.97165
86	S	0	391	1	1.00726
86	T	0	963	1	1.00726
86	W	13504	374	0.0254063	-0.00331168
86	Y	54	3918	0.985569	0.992294
87	*	11833	837	0.0624233	0.0350716
87	A	13	4211	0.996731	1.00387
87	C	546	4340	0.882101	0.885006
87	D	9745	1691	0.1404	0.115927
87	E	271	22692	0.987471	0.994267
87	F	0	2805	1	1.00726
87	G	1817	23078	0.92281	0.927219
87	H	963	18177	0.946714	0.952005
87	I	0	420	1	1.00726
87	K	4266	8867	0.661755	0.656526
87	M	5	1657	0.996804	1.00394
87	N	361	15535	0.975907	0.982276
87	P	18609	260	0.0129803	-0.0161963
87	Q	535	20614	0.973167	0.979435
87	R	14088	399	0.0259661	-0.00273124
87	S	13	14114	0.999022	1.00624
87	T	0	4947	1	1.00726
87	V	0	1058	1	1.00726
87	W	739	14215	0.947659	0.952985
87	Y	0	9524	1	1.00726
88	*	11676	488	0.037851	0.00959231
88	A	7	1367	0.994589	1.00165
88	C	0	1271	1	1.00726
88	D	3	1859	0.998288	1.00548
88	E	0	1130	1	1.00726
88	F	0	284	1	1.00726
88	G	536	2565	0.818325	0.818877
88	H	10	1003	0.989519	0.99639
88	I	5	648	0.991869	0.998827
88	L	0	818	1	1.00726
88	M	0	599	1	1.00726
88	N	2	1220	0.998261	1.00546
88	P	28	8731	0.996604	1.00374
88	Q	0	1082	1	1.00726
88	R	8	1059	0.992038	0.999003
88	S	0	785	1	1.00726
88	T	0	229	1	1.00726
88	V	0	973	1	1.00726
88	W	175	807	0.812753	0.813099
88	Y	90	290	0.752042	0.750147
89	*	10806	418	0.0351309	0.00677179
89	A	200	9986	0.979165	0.985655
89	C	40	3185	0.986833	0.993605
89	D	12163	203	0.0154666	-0.0136183
89	E	21807	361	0.0153428	-0.0137466
89	F	6	669	0.990562	0.997472
89	G	14682	655	0.0402996	0.0121313
89	H	2912	3512	0.53166	0.521629
89	I	0	649	1	1.00726
89	K	18655	682	0.0332664	0.00483845
89	M	0	984	1	1.00726
89	N	7542	4462	0.357685	0.341232
89	P	10973	244	0.0205011	-0.00839794
89	Q	9935	5489	0.342122	0.325094
89	R	10985	396	0.032818	0.00437359
89	S	1508	8342	0.838889	0.840199
89	T	250	12168	0.978638	0.985108
89	V	0	1882	1	1.00726
89	W	1005	17922	0.943774	0.948956
89	Y	0	13357	1	1.00726
90	*	14963	479	0.0292505	0.000674373
90	A	0	1331	1	1.00726
90	C	0	1575	1	1.00726
90	D	0	659	1	1.00726
90	E	0	440	1	1.00726
90	F	0	981	1	1.00726
90	G	31	1520	0.978792	0.985267
90	H	0	686	1	1.00726
90	I	33	380	0.915532	0.919672
90	L	110	956	0.891072	0.894309
90	M	69	534	0.879293	0.882095
90	N	0	687	1	1.00726
90	P	6	3960	0.998393	1.00559
90	Q	0	1002	1	1.00726
90	R	6	1496	0.995757	1.00286
90	S	0	564	1	1.00726
90	T	270	851	0.747902	0.745853
90	V	4	1241	0.996587	1.00372
90	W	0	722	1	1.00726
90	Y	0	819	1	1.00726
91	*	7997	0	0	-0.0296557
91	A	0	1553	1	1.00726
91	C	0	1355	1	1.00726
91	D	17019	517	0.0277986	-0.000831173
91	E	10181	246	0.0222376	-0.0065974
91	F	3894	14615	0.779383	0.778497
91	G	556	7540	0.92735	0.931926
91	H	11107	3773	0.242276	0.221563
91	I	0	1023	1	1.00726
91	K	21228	427	0.0185816	-0.0103883
91	L	20	536	0.96187	0.96772
91	M	0	664	1	1.00726
91	N	8802	2813	0.23125	0.21013
91	P	11586	6123	0.332193	0.314799
91	Q	9138	4213	0.302631	0.284145
91	R	14280	764	0.0479443	0.0200581
91	S	11	3525	0.996696	1.00383
91	T	7	1312	0.994364	1.00141
91	W	18765	686	0.0332654	0.00483741
91	Y	12032	0	0	-0.0296557
92	*	5071	130	0.0235616	-0.00522455
92	A	21	1303	0.983166	0.989803
92	C	0	603	1	1.00726
92	E	15	765	0.979594	0.986099
92	F	0	1785	1	1.00726
92	G	61	113	0.635521	0.629324
92	H	0	931	1	1.00726
92	I	3	1597	0.998008	1.00519
92	K	11	396	0.971335	0.977535
92	L	28	696	0.959011	0.964757
92	M	0	702	1	1.00726
92	N	0	642	1	1.00726
92	P	0	1032	1	1.00726
92	Q	12	1118	0.988725	0.995567
92	R	0	628	1	1.00726
92	S	0	414	1	1.00726
92	T	0	682	1	1.00726
92	V	7	448	0.983671	0.990327
92	W	0	1015	1	1.00726
92	Y	0	836	1	1.00726
93	*	14462	848	0.0523053	0.0245801
93	A	0	794	1	1.00726
93	C	5	800	0.993404	1.00042
93	D	0	1018	1	1.00726
93	E	0	411	1	1.00726
93	F	15	1057	0.985147	0.991857
93	G	0	1453	1	1.00726
93	H	64	786	0.920381	0.9247
93	I	0	456	1	1.00726
93	K	8	521	0.983949	0.990614
93	L	0	568	1	1.00726
93	M	4	1123	0.99623	1.00335
93	N	0	334	1	1.00726
93	P	13	3549	0.996123	1.00324
93	Q	53	1720	0.968301	0.974389
93	R	0	900	1	1.00726
93	S	0	316	1	1.00726
93	V	7	697	0.989443	0.996311
93	W	0	766	1	1.00726
93	Y	28	1293	0.977511	0.983939
94	*	14807	267	0.0166895	-0.0123502
94	C	5	281	0.981447	0.98802
94	D	0	1806	1	1.00726
94	E	0	1278	1	1.00726
94	F	0	621	1	1.00726
94	G	0	1561	1	1.00726
94	H	8	1175	0.992819	0.999812
94	I	4	860	0.995083	1.00216
94	K	0	1667	1	1.00726
94	L	0	422	1	1.00726
94	M	86	1452	0.9408	0.945873
94	N	15	1141	0.986226	0.992975
94	P	105	840	0.882768	0.885698
94	Q	3	791	0.995987	1.0031
94	R	0	402	1	1.00726
94	S	0	763	1	1.00726
94	T	0	796	1	1.00726
94	V	257	1518	0.847553	0.849183
94	W	7	1527	0.995153	1.00223
94	Y	0	1468	1	1.00726
95	*	14204	191	0.0124988	-0.0166956
95	A	453	15260	0.969426	0.975556
95	C	26	7236	0.996197	1.00332
95	D	592	6960	0.917124	0.921322
95	E	9605	100	0.00970458	-0.019593
95	F	9214	5218	0.347704	0.330882
95	G	706	11479	0.938666	0.94366
95	H	181	19088	0.990026	0.996916
95	I	14942	409	0.0251175	-0.00361119
95	K	603	17829	0.965314	0.971292
95	L	4652	15720	0.760805	0.759233
95	M	810	13993	0.942064	0.947184
95	P	13994	2049	0.121126	0.0959406
95	Q	63	10956	0.993928	1.00096
95	R	5157	26174	0.826909	0.827777
95	S	57	7312	0.991786	0.998741
95	T	8702	2714	0.226941	0.205662
95	V	13752	365	0.0243736	-0.00438252
95	W	11784	612	0.0466059	0.0186703
95	Y	4039	14603	0.772888	0.771762
96	*	10927	484	0.0400234	0.0118449
96	A	0	649	1	1.00726
96	C	0	831	1	1.00726
96	D	13	469	0.971394	0.977596
96	E	0	986	1	1.00726
96	F	0	349	1	1.00726
96	G	0	834	1	1.00726
96	H	0	758	1	1.00726
96	I	2	359	0.994116	1.00116
96	K	64	759	0.917782	0.922005
96	L	0	984	1	1.00726
96	M	6	439	0.985687	0.992417
96	N	0	971	1	1.00726
96	Q	146	573	0.786968	0.786361
96	R	0	977	1	1.00726
96	S	0	452	1	1.00726
96	T	8	934	0.990982	0.997908
96	V	0	744	1	1.00726
96	W	13	597	0.977389	0.983812
96	Y	0	635	1	1.00726
97	*	11600	260	0.0206613	-0.00823185
97	A	0	727	1	1.00726
97	C	0	2340	1	1.00726
97	D	0	1810	1	1.00726
97	E	44	3616	0.987237	0.994025
97	F	1	2053	0.999483	1.00672
97	G	26	3543	0.992264	0.999237
97	H	5	1392	0.996198	1.00332
97	I	0	2186	1	1.00726
97	L	0	530	1	1.00726
97	M	5	954	0.994463	1.00152
97	N	0	531	1	1.00726
97	P	230	11944	0.979952	0.98647
97	Q	0	1021	1	1.00726
97	R	4	929	0.995446	1.00254
97	S	0	3088	1	1.00726
97	T	0	1678	1	1.00726
97	V	0	1075	1	1.00726
97	W	41	3329	0.987084	0.993866
97	Y	47	3236	0.984804	0.991501
98	*	13013	718	0.0493705	0.021537
98	A	42	4866	0.990913	0.997836
98	C	0	3175	1	1.00726
98	D	165	20315	0.991445	0.998387
98	E	147	10846	0.985805	0.99254
98	F	112	5123	0.977301	0.983721
98	G	23	5255	0.995372	1.00246
98	H	97	14062	0.992725	0.999715
98	I	12428	9787	0.425696	0.411753
98	K	115	5556	0.978483	0.984947
98	L	980	18374	0.946374	0.951653
98	M	26	10449	0.997363	1.00452
98	N	0	2630	1	1.00726
98	P	885	13070	0.93289	0.937671
98	Q	177	4711	0.961616	0.967457
98	R	173	12843	0.985891	0.992628
98	S	2393	1816	0.416673	0.402397
98	V	113	7664	0.984577	0.991266
98	W	7664	22180	0.731475	0.72882
98	Y	271	18894	0.98499	0.991695
99	*	14006	222	0.0147	-0.0144132
99	A	64	7462	0.99097	0.997895
99	C	0	435	1	1.00726
99	D	427	16743	0.97362	0.979904
99	E	206	11452	0.981248	0.987814
99	F	631	15860	0.959446	0.965207
99	G	44	5912	0.992155	0.999124
99	H	12	4671	0.997278	1.00444
99	I	1	3414	0.999689	1.00694
99	K	357	19401	0.980825	0.987376
99	L	1426	11730	0.885618	0.888653
99	M	266	13495	0.979488	0.98599
99	N	38	11451	0.996487	1.00362
99	Q	4	14249	0.999702	1.00695
99	R	1390	16049	0.915739	0.919886
99	S	21	6450	0.996553	1.00368
99	T	0	1330	1	1.00726
99	V	836	14632	0.942773	0.947919
99	W	189	12385	0.984046	0.990715
99	Y	63	11810	0.994365	1.00141
100	*	9044	121	0.0124365	-0.0167602
100	A	7	640	0.988513	0.995348
100	C	1	554	0.998086	1.00527
100	D	50	1685	0.969438	0.975568
100	E	6	1626	0.996095	1.00321
100	F	0	861	1	1.00726
100	G	16	1129	0.985167	0.991878
100	H	21	1237	0.982284	0.988888
100	I	0	1218	1	1.00726
100	L	105	1200	0.914946	0.919064
100	M	0	1039	1	1.00726
100	N	0	1292	1	1.00726
100	P	11	1987	0.994153	1.0012
100	Q	0	558	1	1.00726
100	R	78	909	0.916453	0.920627
100	S	50	1280	0.960153	0.965941
100	T	0	1003	1	1.00726
100	V	0	710	1	1.00726
100	W	0	365	1	1.00726
100	Y	0	525	1	1.00726
101	*	10600	397	0.0340524	0.00565349
101	A	11	1713	0.993224	1.00023
101	C	0	577	1	1.00726
101	D	7300	710	0.0838692	0.057309
101	E	3133	5310	0.614689	0.607722
101	F	0	498	1	1.00726
101	G	0	8914	1	1.00726
101	H	0	950	1	1.00726
101	I	48	6512	0.99223	0.999201
101	K	0	2185	1	1.00726
101	L	0	3087	1	1.00726
101	M	0	2249	1	1.00726
101	N	0	1162	1	1.00726
101	P	15602	2515	0.13174	0.106947
101	Q	28	4241	0.993035	1.00004
101	R	0	3772	1	1.00726
101	S	12	1170	0.989221	0.996081
101	T	43	3722	0.987875	0.994686
101	V	16	5933	0.997143	1.0043
101	W	2	1157	0.998167	1.00536
102	*	8272	84	0.00946775	-0.0198385
102	A	7	965	0.992352	0.999328
102	C	0	1078	1	1.00726
102	D	3	1382	0.997699	1.00487
102	E	0	1244	1	1.00726
102	F	17	2167	0.991734	0.998688
102	G	16	1549	0.989145	0.996003
102	H	0	1062	1	1.00726
102	I	30	1948	0.983902	0.990566
102	L	0	1582	1	1.00726
102	M	3	740	0.995711	1.00281
102	N	4	1041	0.995934	1.00304
102	P	6820	2	0.000275953	-0.0293696
102	Q	182	692	0.781605	0.7808
102	R	91	859	0.898837	0.902361
102	S	0	1585	1	1.00726
102	T	7	1011	0.992698	0.999687
102	V	7	990	0.992544	0.999527
102	W	23	4466	0.994558	1.00162
102	Y	13	2470	0.994439	1.00149
103	*	17282	421	0.0224157	-0.00641273
103	A	0	1261	1	1.00726
103	C	0	421	1	1.00726
103	D	2762	26679	0.900911	0.904511
103	E	80	14564	0.994198	1.00124
103	G	14	8187	0.998187	1.00538
103	H	2	1862	0.99886	1.00608
103	I	0	810	1	1.00726
103	K	36	2175	0.982719	0.98934
103	L	0	848	1	1.00726
103	M	0	1352	1	1.00726
103	N	0	2262	1	1.00726
[truncated: 4,040 more rows]

## Sheet: TF scores rep 2
Position	aa	Counts (uncut)	Counts (uncut)	functional score (unnormalized)	functional score (normalized)
WT	WT	227	36305	0.99	1
1	*	19131	459	0.0174912	-0.0172686
1	A	0	38
1	C	0	1152	1	1.01046
1	D	10	17329	0.999223	1.00965
1	E	1113	6236	0.806103	0.807639
1	F	0	114	1	1.01046
1	G	27	40
1	H	0	435	1	1.01046
1	I	0	338	1	1.01046
1	K	38	192	0.789433	0.790202
1	L	0	18
1	M	73	678	0.873282	0.87791
1	N	0	1331	1	1.01046
1	P	8	1735	0.993824	1.004
1	Q	0	369	1	1.01046
1	R	0	27
1	T	0	57
1	V	0	212	1	1.01046
1	W	0	219	1	1.01046
1	Y	0	233	1	1.01046
2	*	24060	1079	0.0322046	-0.00187804
2	A	143	20668	0.990762	1.0008
2	C	49	11746	0.994409	1.00461
2	D	5456	9119	0.553605	0.54352
2	E	3430	21900	0.825711	0.82815
2	F	117	11135	0.986037	0.995855
2	H	47	14272	0.995581	1.00584
2	I	1032	22527	0.94185	0.949634
2	K	72	17497	0.994485	1.00469
2	L	47	29358	0.997847	1.00821
2	M	17	19355	0.998818	1.00922
2	N	0	13104	1	1.01046
2	P	86	3482	0.967786	0.976764
2	Q	465	34078	0.981943	0.991572
2	R	206	14710	0.981476	0.991084
2	S	258	18056	0.981107	0.990697
2	T	43	15498	0.996275	1.00656
2	V	96	22387	0.994254	1.00445
2	W	45	9950	0.993942	1.00412
2	Y	46	22059	0.997198	1.00753
3	*	11699	450	0.0277492	-0.00653849
3	A	20586	1075	0.0373022	0.00345422
3	C	7710	11055	0.515487	0.503648
3	D	21497	362	0.0123409	-0.022656
3	E	20778	110	0.00391286	-0.0314719
3	G	29649	2012	0.0479392	0.0145808
3	H	19303	173	0.00660619	-0.0286546
3	I	101	8028	0.983327	0.99302
3	L	33	5149	0.991437	1.0015
3	M	363	7956	0.942072	0.949866
3	N	12590	136	0.0079516	-0.0272473
3	P	6430	41252	0.826401	0.828871
3	Q	20014	226	0.0083092	-0.0268732
3	R	19349	2273	0.0801776	0.048303
3	S	12937	585	0.0324637	-0.00160701
3	T	9404	616	0.0463516	0.0129201
3	V	813	22119	0.952802	0.96109
3	W	45	8732	0.993103	1.00325
3	Y	5964	10899	0.575551	0.566475
4	*	16374	1499	0.0636082	0.0309709
4	A	96	15037	0.991469	1.00154
4	C	31	3508	0.988231	0.998149
4	D	26851	939	0.0252923	-0.00910849
4	E	11921	2594	0.139015	0.109848
4	F	5508	24276	0.765826	0.765508
4	G	18391	10974	0.306884	0.285443
4	H	514	30503	0.977795	0.987233
4	I	0	1315	1	1.01046
4	K	0	89
4	L	785	3047	0.742276	0.740875
4	M	419	23322	0.97636	0.985732
4	N	506	10331	0.938079	0.945689
4	P	199	16021	0.983536	0.993238
4	Q	22	5510	0.994648	1.00486
4	S	4	171	0.969438	0.978492
4	T	15	9540	0.997885	1.00825
4	V	0	676	1	1.01046
4	W	8850	3876	0.245268	0.220992
4	Y	4031	15367	0.738814	0.737253
5	*	21173	1077	0.0363707	0.00247982
5	A	23	3589	0.991437	1.0015
5	C	0	4512	1	1.01046
5	D	4955	21474	0.762792	0.762335
5	E	1004	27227	0.952656	0.960938
5	F	0	329	1	1.01046
5	G	214	35174	0.991867	1.00195
5	H	7	833	0.988802	0.998747
5	I	19	2820	0.991001	1.00105
5	L	0	765	1	1.01046
5	M	0	795	1	1.01046
5	N	0	8011	1	1.01046
5	P	16	1467	0.985514	0.995308
5	Q	24	5189	0.993805	1.00398
5	R	258	7749	0.957056	0.96554
5	S	24	2468	0.987064	0.996929
5	T	0	2256	1	1.01046
5	V	12	7056	0.997713	1.00807
5	W	0	284	1	1.01046
5	Y	1275	452	0.208265	0.182286
6	*	11565	49	0.00313398	-0.0322866
6	A	9441	16969	0.571489	0.562227
6	C	1545	15406	0.880937	0.885918
6	D	19500	1047	0.0383137	0.00451222
6	E	8219	282	0.0248268	-0.00959542
6	F	731	3902	0.798418	0.7996
6	G	20646	9360	0.251718	0.227738
6	H	9916	2502	0.157698	0.129391
6	I	76	3510	0.971647	0.980802
6	K	6260	837	0.0902565	0.0588457
6	L	196	19858	0.986873	0.996729
6	N	17632	950	0.038442	0.00464644
6	P	17036	555	0.0236026	-0.0108759
6	Q	559	20147	0.963955	0.972756
6	R	19781	7282	0.21455	0.18886
6	S	8582	8938	0.435917	0.420415
6	T	3268	15113	0.77434	0.774414
6	V	32	13197	0.996743	1.00705
6	W	3344	23522	0.839211	0.842271
6	Y	2103	25027	0.898274	0.904053
7	*	15815	863	0.0389146	0.00514075
7	C	210	657	0.698924	0.695528
7	D	17579	726	0.0297332	-0.00446315
7	E	10372	27	0.00192784	-0.0335483
7	F	11513	629	0.0389594	0.00518766
7	G	12012	14835	0.478186	0.464629
7	H	25937	740	0.0207311	-0.0138796
7	I	12268	19687	0.543532	0.532983
7	K	14153	872	0.0437182	0.0101655
7	L	12586	3487	0.170521	0.142804
7	M	28180	945	0.0242787	-0.0101687
7	N	12575	12251	0.41958	0.403326
7	P	6351	11338	0.569829	0.56049
7	Q	14840	644	0.0311958	-0.00293324
7	R	16570	1533	0.0642382	0.0316299
7	S	0	716	1	1.01046
7	T	0	6138	1	1.01046
7	V	54	3853	0.981462	0.991069
7	W	30893	1475	0.0342153	0.000225236
7	Y	14651	3644	0.155799	0.127405
8	*	8584	516	0.0426989	0.0090993
8	A	21	3660	0.992327	1.00243
8	C	8	6224	0.998271	1.00865
8	D	7885	39037	0.786029	0.786641
8	E	5180	14611	0.676684	0.672264
8	G	17654	7334	0.235621	0.210901
8	H	0	2635	1	1.01046
8	I	11718	11612	0.423729	0.407667
8	K	5269	4023	0.36165	0.34273
8	L	20	8723	0.99692	1.00724
8	M	193	14373	0.982225	0.991867
8	N	140	11692	0.984119	0.993848
8	P	8064	1	9.20064e-05	-0.0354686
8	Q	11	2148	0.993146	1.00329
8	R	5581	22888	0.75266	0.751736
8	S	189	29082	0.991318	1.00138
8	T	335	12380	0.964815	0.973656
8	V	3408	32237	0.875293	0.880014
8	W	0	4251	1	1.01046
8	Y	12	1298	0.987694	0.997588
9	*	15045	1547	0.0708883	0.0385861
9	A	7092	7110	0.42657	0.410638
9	C	4506	8345	0.578802	0.569876
9	D	11371	281	0.0180063	-0.0167298
9	E	11206	1525	0.0917168	0.0603732
9	F	4998	0	0	-0.0355649
9	G	14080	848	0.0427774	0.0091814
9	H	16491	1245	0.0530468	0.0199234
9	I	22004	912	0.0298364	-0.00435522
9	K	17135	564	0.023841	-0.0106266
9	L	8018	495	0.0438021	0.0102533
9	M	11838	1260	0.0731962	0.0410002
9	N	24498	1707	0.0491607	0.0158585
9	Q	12866	2007	0.10374	0.0729498
9	R	20922	844	0.0290629	-0.00516434
9	S	10048	596	0.042157	0.0085324
9	T	7850	363	0.0331737	-0.000864335
9	V	10524	1138	0.0742765	0.0421302
9	W	24678	1087	0.0316491	-0.00245914
9	Y	26161	748	0.0207749	-0.0138338
10	*	21482	1933	0.0625887	0.0299045
10	A	13897	41	0.00218435	-0.03328
10	C	11041	24694	0.623997	0.617152
10	D	14084	704	0.0357634	0.00184455
10	E	25647	740	0.0209606	-0.0136395
10	F	16327	189	0.00851627	-0.0266566
10	G	18723	876	0.0335518	-0.000468839
10	H	7076	157	0.0161968	-0.0186226
10	I	13200	721	0.0389507	0.00517857
10	K	17678	331	0.0137029	-0.0212313
10	L	21103	1252	0.0421657	0.00854149
10	M	20207	1036	0.0366481	0.00276997
10	N	23289	1435	0.0437214	0.0101688
10	P	6547	626	0.0662479	0.0337321
10	Q	14169	245	0.0126677	-0.0223141
10	R	15528	0	0	-0.0355649
10	T	0	417	1	1.01046
10	V	21708	468	0.015745	-0.0190952
10	W	17778	1527	0.0599145	0.0271072
10	Y	18557	482	0.0189085	-0.0157861
11	*	19704	761	0.0278592	-0.00642348
11	A	16583	22599	0.502783	0.490359
11	C	21629	669	0.0224359	-0.0120963
11	D	30767	507	0.0120796	-0.0229293
11	E	7179	99	0.0101288	-0.0249699
11	F	26147	978	0.0270045	-0.00731746
11	H	15171	11	0.000537716	-0.0350024
11	I	26718	2266	0.0592051	0.0263652
11	K	14329	1966	0.0923997	0.0610876
11	L	23007	1887	0.0573671	0.0244426
11	M	17809	962	0.0385369	0.0047457
11	N	23655	1522	0.0455665	0.0120989
11	P	20213	1206	0.0423947	0.00878106
11	Q	27694	524	0.0138452	-0.0210824
11	R	16758	265	0.0115975	-0.0234335
11	S	9173	5122	0.292947	0.270865
11	T	19915	293	0.0107989	-0.0242689
11	V	23856	2476	0.0715057	0.0392319
11	W	13902	1136	0.0571669	0.0242331
11	Y	14275	308	0.0157574	-0.0190822
12	*	16176	1485	0.0637741	0.0311445
12	A	1953	11461	0.813238	0.815102
12	C	1958	38993	0.936616	0.944159
12	D	10650	5457	0.275468	0.252581
12	E	12838	1996	0.103432	0.0726276
12	F	10965	6412	0.302603	0.280966
12	G	15645	1810	0.0790576	0.0471314
12	H	2511	9833	0.743963	0.742639
12	I	4703	12157	0.657305	0.651993
12	L	3051	27845	0.871332	0.87587
12	M	1096	13069	0.898456	0.904242
12	N	8643	14510	0.554703	0.544669
12	P	5800	8648	0.525247	0.513857
12	Q	509	18877	0.964935	0.973781
12	R	7	3340	0.997183	1.00751
12	S	2543	25778	0.882651	0.887711
12	T	10668	9967	0.40942	0.392698
12	V	1921	26337	0.910498	0.916839
12	W	13615	12787	0.410684	0.394021
12	Y	5334	14812	0.673254	0.668676
13	*	20315	59	0.00215035	-0.0333155
13	A	43	6927	0.991703	1.00178
13	C	34	9217	0.995053	1.00529
13	D	19567	147	0.00554354	-0.0297662
13	E	32261	1670	0.0369895	0.00312706
13	F	25076	767	0.0221921	-0.0123513
13	G	20706	1910	0.0640609	0.0314445
13	H	26538	487	0.0134337	-0.0215129
13	I	12	13277	0.998783	1.00919
13	K	16131	1915	0.0809565	0.0491177
13	L	22957	1083	0.0338205	-0.000187797
13	M	13735	871	0.0449396	0.0114431
13	N	22082	1378	0.0442549	0.0107269
13	P	3182	4176	0.493362	0.480505
13	Q	21376	675	0.0228943	-0.0116168
13	R	10061	33	0.00242787	-0.0330252
13	S	2597	24056	0.872987	0.877602
13	T	60	13541	0.994064	1.00425
13	W	19232	109	0.00418782	-0.0311843
13	Y	27615	855	0.0224577	-0.0120735
14	*	18224	1225	0.0475075	0.0141292
14	A	14761	393	0.0193727	-0.0153006
14	C	28423	991	0.0252185	-0.00918566
14	D	21829	2424	0.0761239	0.0440626
14	F	11882	0	0	-0.0355649
14	G	21200	1386	0.0462661	0.0128307
14	H	23435	2256	0.0666682	0.0341717
14	I	14971	1173	0.0549432	0.0219071
14	K	27785	2051	0.0519284	0.0187535
14	L	34152	512	0.0110016	-0.0240569
14	M	12623	286	0.0165337	-0.0182701
14	N	22335	2728	0.0830979	0.0513576
14	P	17206	138	0.00591603	-0.0293765
14	Q	13755	1516	0.0755976	0.0435122
14	R	13496	192	0.0104459	-0.0246382
14	S	18968	785	0.0297934	-0.00440016
14	T	13988	234	0.0122606	-0.02274
14	V	33665	821	0.017774	-0.0169728
14	W	24456	2043	0.0583677	0.0254892
14	Y	14131	0	0	-0.0355649
15	*	10904	1665	0.101771	0.0708901
15	A	59	2573	0.970023	0.979104
15	C	0	1808	1	1.01046
15	D	50	11734	0.99429	1.00449
15	E	92	10515	0.988346	0.99827
15	F	78	10153	0.989752	0.999741
15	H	88	12298	0.990448	1.00047
15	I	19	2571	0.990139	1.00014
15	K	0	1372	1	1.01046
15	L	0	4304	1	1.01046
15	M	0	5602	1	1.01046
15	N	0	1712	1	1.01046
15	P	313	1529	0.78377	0.784278
15	Q	1	2779	0.999515	1.00995
15	R	0	3873	1	1.01046
15	S	63	1678	0.951838	0.960082
15	T	35	3783	0.987685	0.997578
15	V	0	993	1	1.01046
15	W	29	9722	0.995996	1.00627
15	Y	43	10220	0.994362	1.00456
16	*	25054	893	0.0257659	-0.00861302
16	A	0	1351	1	1.01046
16	D	11465	1699	0.0990652	0.0680598
16	E	24056	5263	0.139665	0.110528
16	F	11325	345	0.0221046	-0.0124429
16	G	0	8169	1	1.01046
16	H	20985	1745	0.0581156	0.0252255
16	I	8849	318	0.0259724	-0.00839704
16	K	15831	1792	0.077484	0.0454854
16	L	2556	19309	0.848609	0.852101
16	M	16210	226	0.0102392	-0.0248544
16	N	3608	26963	0.847214	0.850642
16	P	2488	1594	0.322211	0.301476
16	Q	3373	9402	0.674086	0.669546
16	R	17657	301	0.0124911	-0.0224989
16	S	8	8285	0.9987	1.0091
16	T	0	4239	1	1.01046
16	V	132	9051	0.980724	0.990297
16	W	17437	170	0.00718216	-0.0280521
16	Y	8359	723	0.0603084	0.0275192
17	*	20895	3734	0.117075	0.0868985
17	A	218	24832	0.988307	0.998229
17	C	103	18162	0.992415	1.00253
17	D	29374	202	0.00507676	-0.0302544
17	E	10399	14019	0.500077	0.487528
17	F	2314	22012	0.875905	0.880654
17	G	12301	27198	0.621299	0.61433
17	H	10609	981	0.0642071	0.0315973
17	I	69	2346	0.961873	0.970579
17	K	16384	3401	0.133469	0.104047
17	L	19	6578	0.996122	1.0064
17	N	13628	11220	0.379228	0.361118
17	P	3818	4193	0.449002	0.434102
17	Q	9531	22537	0.636964	0.630716
17	R	22663	2324	0.0707096	0.0383992
17	S	934	25915	0.953678	0.962006
17	T	8	5072	0.997879	1.00824
17	V	0	1509	1	1.01046
17	W	25846	1102	0.0306669	-0.00348652
17	Y	14636	31045	0.611485	0.604064
18	*	16693	1282	0.053913	0.0208295
18	A	0	4627	1	1.01046
18	C	0	1427	1	1.01046
18	D	25825	2682	0.0715463	0.0392744
18	E	22892	631	0.0200429	-0.0145995
18	F	6144	0	0	-0.0355649
18	G	1044	23293	0.943037	0.950875
18	H	10224	300	0.0213086	-0.0132755
18	I	14	2276	0.991778	1.00186
18	K	26177	894	0.0247148	-0.00971252
18	L	0	3232	1	1.01046
18	M	45	9818	0.993861	1.00404
18	N	7395	19096	0.657073	0.65175
18	P	12492	41	0.00242943	-0.0330236
18	Q	29983	6442	0.137503	0.108267
18	R	16473	750	0.0326789	-0.00138189
18	S	93	5613	0.978158	0.987613
18	T	30	3450	0.988417	0.998344
18	W	25751	1286	0.0357317	0.00181136
18	Y	24784	3689	0.0994601	0.0684729
19	*	20705	193	0.00686906	-0.0283796
19	A	0	5522	1	1.01046
19	C	0	2971	1	1.01046
19	D	9	12182	0.999005	1.00942
19	E	0	1113	1	1.01046
19	F	0	4816	1	1.01046
19	G	79	3937	0.973669	0.982918
19	H	69	2876	0.968679	0.977698
19	I	0	3070	1	1.01046
19	K	22	738	0.961377	0.970059
19	L	54	6890	0.989548	0.999527
19	M	0	2046	1	1.01046
19	N	0	7671	1	1.01046
19	P	13	13258	0.99868	1.00908
19	R	0	810	1	1.01046
19	S	0	5157	1	1.01046
19	T	0	5911	1	1.01046
19	V	0	911	1	1.01046
19	W	0	1497	1	1.01046
19	Y	661	8658	0.906708	0.912875
20	*	19310	559	0.0210285	-0.0135685
20	A	45	7023	0.991439	1.0015
20	C	420	9533	0.943952	0.951833
20	D	42712	1762	0.0297009	-0.00449694
20	E	25767	521	0.0147814	-0.0201032
20	F	2132	58836	0.953438	0.961756
20	G	16163	1433	0.0617252	0.0290013
20	H	8070	230	0.0207097	-0.013902
20	I	6	4378	0.998156	1.00853
20	K	19466	1959	0.0694848	0.037118
20	L	10	15368	0.999124	1.00954
20	M	32	7745	0.994463	1.00467
20	N	18123	1279	0.0497602	0.0164856
20	P	10882	182	0.0122579	-0.0227428
20	Q	18170	735	0.0291405	-0.00508314
20	R	24415	1731	0.0499784	0.0167138
20	S	1673	33777	0.937425	0.945005
20	T	71	12937	0.992658	1.00278
20	W	12830	729	0.0404552	0.00675232
20	Y	36473	1975	0.0386274	0.0048404
21	*	20556	1345	0.0463023	0.0128685
21	A	0	2233	1	1.01046
21	C	0	1440	1	1.01046
21	D	135	3669	0.952755	0.96104
21	E	95	4503	0.972354	0.981541
21	F	0	2120	1	1.01046
21	G	0	3181	1	1.01046
21	H	22	6935	0.995743	1.00601
21	I	53	236	0.76766	0.767427
21	K	0	764	1	1.01046
21	L	61	1134	0.932405	0.939754
21	M	8	834	0.987237	0.99711
21	N	2574	5000	0.590391	0.581999
21	P	5491	201	0.0264432	-0.00790458
21	Q	0	755	1	1.01046
21	R	3	941	0.995722	1.00599
21	S	12	1402	0.988596	0.998532
21	V	193	289	0.526311	0.51497
21	W	0	1292	1	1.01046
21	Y	7	5893	0.998402	1.00879
22	*	21659	261	0.00886226	-0.0262947
22	A	38	3938	0.987162	0.997032
22	D	39	3286	0.984257	0.993992
22	E	138	9215	0.980217	0.989766
22	F	0	7289	1	1.01046
22	G	98	21254	0.993824	1.004
22	H	0	10723	1	1.01046
22	I	0	1651	1	1.01046
22	K	0	10978	1	1.01046
22	L	23	3133	0.990203	1.00021
22	M	0	2578	1	1.01046
22	N	96	8408	0.984846	0.994608
22	P	15407	21	0.00101035	-0.034508
22	Q	0	4408	1	1.01046
22	R	64	28736	0.997007	1.00733
22	S	0	2439	1	1.01046
22	T	38	1883	0.973523	0.982765
22	V	0	445	1	1.01046
22	W	17	13398	0.998293	1.00867
22	Y	9	8558	0.998585	1.00898
23	*	20975	722	0.0249052	-0.00951336
23	A	125	2290	0.931477	0.938783
23	C	9	477	0.975202	0.984521
23	D	0	3155	1	1.01046
23	E	4	3358	0.998397	1.00878
23	F	9	2923	0.995868	1.00614
23	H	0	2210	1	1.01046
23	I	0	1446	1	1.01046
23	K	1	1314	0.998975	1.00939
23	L	178	2280	0.904802	0.91088
23	M	47	4105	0.984804	0.994565
23	N	61	3006	0.97338	0.982615
23	P	213	15534	0.981856	0.991481
23	Q	18	2836	0.991519	1.00159
23	R	29	3499	0.988954	0.998905
23	S	31	3090	0.98666	0.996506
23	T	1	5879	0.999771	1.01022
23	V	8	1310	0.991837	1.00192
23	W	25	3720	0.991024	1.00107
23	Y	0	4959	1	1.01046
24	*	17317	791	0.0327821	-0.00127397
24	A	96	1780	0.93224	0.939582
24	C	0	1039	1	1.01046
24	D	32	3245	0.986884	0.996741
24	E	72	2584	0.963807	0.972602
24	F	0	751	1	1.01046
24	G	11	1327	0.988952	0.998904
24	H	3	389	0.989713	0.9997
24	I	0	532	1	1.01046
24	K	0	871	1	1.01046
24	L	0	806	1	1.01046
24	M	0	1117	1	1.01046
24	N	0	176	1	1.01046
24	P	0	1128	1	1.01046
24	Q	1	1467	0.999082	1.0095
24	R	0	1435	1	1.01046
24	S	0	838	1	1.01046
24	V	0	1425	1	1.01046
24	W	0	326	1	1.01046
24	Y	0	1025	1	1.01046
25	*	21322	2259	0.0728838	0.0406734
25	A	0	799	1	1.01046
25	C	0	2546	1	1.01046
25	D	984	21060	0.940761	0.948495
25	E	217	31160	0.990702	1.00073
25	F	271	1081	0.747463	0.7463
25	G	20	2397	0.98888	0.998829
25	H	20	25830	0.998958	1.00937
25	I	16	11246	0.998086	1.00846
25	K	2450	7911	0.70553	0.702437
25	L	9	1046	0.988537	0.99847
25	M	0	631	1	1.01046
25	N	18	8852	0.997267	1.0076
25	P	52	3870	0.982214	0.991855
25	Q	9	3507	0.996553	1.00685
25	R	0	5327	1	1.01046
25	S	0	2013	1	1.01046
25	V	0	9793	1	1.01046
25	W	26	2251	0.984672	0.994427
25	Y	49	1654	0.961607	0.9703
26	*	32381	2230	0.048616	0.0152887
26	A	294	1053	0.726597	0.724473
26	C	0	451	1	1.01046
26	D	118	20040	0.992127	1.00222
26	E	16	4849	0.995573	1.00583
26	F	0	2468	1	1.01046
26	G	1168	902	0.364281	0.345483
26	H	0	1650	1	1.01046
26	I	0	2121	1	1.01046
26	K	29	824	0.954717	0.963093
26	L	11	3216	0.995411	1.00566
26	M	0	829	1	1.01046
26	N	0	612	1	1.01046
26	P	6362	26099	0.752718	0.751797
26	Q	0	1546	1	1.01046
26	R	0	264	1	1.01046
26	S	5	974	0.993129	1.00327
26	V	6	2286	0.996475	1.00677
26	W	199	2648	0.908034	0.914261
26	Y	0	843	1	1.01046
29	*	22000	1883	0.0597166	0.0269002
29	A	175	28577	0.991815	1.0019
29	C	15378	887	0.0410423	0.00736642
29	D	29663	1076	0.0262102	-0.00814829
29	E	18997	722	0.0274273	-0.00687523
29	F	35666	785	0.016069	-0.0187563
29	H	30305	1820	0.042661	0.00905965
29	I	31183	795	0.018566	-0.0161443
29	K	16167	491	0.0220385	-0.012512
29	L	2249	0	0	-0.0355649
29	M	3204	168	0.0374497	0.0036085
29	N	19039	940	0.03534	0.00140166
29	P	23942	794	0.0240166	-0.0104429
29	Q	28348	1072	0.0272937	-0.00701495
29	R	8776	1422	0.107326	0.0767007
29	S	4638	24854	0.799046	0.800257
29	T	19505	530	0.0197637	-0.0148915
29	V	26894	1200	0.0320471	-0.0020428
29	Y	22747	2233	0.067895	0.035455
30	*	31098	136	0.00323451	-0.0321815
30	A	101	3710	0.964609	0.973441
30	C	0	1111	1	1.01046
30	D	46495	434	0.00687851	-0.0283698
30	E	21623	3089	0.0958418	0.064688
30	F	22	6354	0.995355	1.0056
30	G	5666	5060	0.39855	0.381328
30	H	18719	1576	0.0587983	0.0259396
30	I	0	1048	1	1.01046
30	K	17164	286	0.0122129	-0.0227898
30	N	1404	47979	0.962059	0.970773
30	P	1651	34777	0.939867	0.94756
30	Q	984	40432	0.968243	0.977241
30	R	26225	34	0.000961068	-0.0345596
30	S	27	11201	0.996762	1.00707
30	T	1	11721	0.999885	1.01034
30	V	0	659	1	1.01046
30	W	5212	1931	0.215629	0.189989
30	Y	24054	649	0.0196271	-0.0150344
31	*	7588	0	0	-0.0355649
31	A	2115	0	0	-0.0355649
31	C	10142	1854	0.119441	0.0893733
31	E	8500	0	0	-0.0355649
31	F	43	1224	0.954795	0.963174
31	G	1654	239	0.0968361	0.0657282
31	H	0	3113	1	1.01046
31	I	1921	0	0	-0.0355649
31	K	3772	1400	0.215933	0.190306
31	L	1029	2115	0.603979	0.596212
31	M	2613	11012	0.757696	0.757005
31	N	8624	0	0	-0.0355649
31	P	4456	100	0.0163791	-0.0184319
31	Q	1111	0	0	-0.0355649
31	R	6001	16	0.00197445	-0.0334995
31	S	5299	0	0	-0.0355649
31	T	5928	0	0	-0.0355649
31	V	9657	390	0.0290943	-0.00513149
31	Y	0	93
32	*	1868	0	0	-0.0355649
32	A	0	576	1	1.01046
32	C	18	449	0.948742	0.956843
32	D	5550	75	0.00992759	-0.0251803
32	E	2562	33	0.009467	-0.0256621
32	F	38	3005	0.983243	0.992932
32	G	16233	1014	0.0442966	0.0107705
32	H	1382	0	0	-0.0355649
32	I	0	202	1	1.01046
32	K	3375	0	0	-0.0355649
32	M	78	1040	0.908202	0.914437
32	N	3418	2880	0.384697	0.366837
32	P	3933	0	0	-0.0355649
32	Q	1097	188	0.112817	0.0824442
32	R	2086	0	0	-0.0355649
32	S	3628	5583	0.533114	0.522086
32	W	6862	967	0.0946658	0.063458
32	Y	2726	66	0.0176479	-0.0171047
33	*	7816	235	0.0218227	-0.0127377
33	A	0	472	1	1.01046
33	C	0	141	1	1.01046
33	E	0	1127	1	1.01046
33	F	0	222	1	1.01046
33	G	7	381	0.975837	0.985186
33	H	0	149	1	1.01046
33	I	0	68
33	K	0	309	1	1.01046
33	L	0	33
33	M	61	188	0.695757	0.692214
33	N	0	37
33	P	3401	0	0	-0.0355649
33	Q	0	467	1	1.01046
33	R	0	171	1	1.01046
33	S	0	189	1	1.01046
33	T	0	165	1	1.01046
33	V	0	251	1	1.01046
33	W	0	357	1	1.01046
33	Y	51	437	0.864093	0.868298
34	*	8471	0	0	-0.0355649
34	A	0	370	1	1.01046
34	C	0	293	1	1.01046
34	D	0	0
34	E	0	326	1	1.01046
34	F	0	62
34	G	0	148	1	1.01046
34	H	0	553	1	1.01046
34	I	0	2847	1	1.01046
34	K	0	265	1	1.01046
34	L	8	773	0.986244	0.996071
34	M	0	162	1	1.01046
34	N	0	130	1	1.01046
34	P	563	4226	0.847785	0.85124
34	Q	0	803	1	1.01046
34	R	0	1118	1	1.01046
34	S	0	323	1	1.01046
34	T	0	494	1	1.01046
34	V	0	1101	1	1.01046
34	W	0	381	1	1.01046
34	Y	0	77
35	*	9958	1008	0.0698625	0.0375131
35	A	3	1620	0.99751	1.00786
35	C	59	1348	0.944299	0.952196
35	D	10	402	0.967563	0.97653
35	F	115	285	0.647749	0.641997
35	G	21	1596	0.982576	0.992234
35	H	0	1565	1	1.01046
35	I	0	175	1	1.01046
35	K	0	1802	1	1.01046
35	L	0	964	1	1.01046
35	M	0	716	1	1.01046
35	N	0	266	1	1.01046
35	Q	0	387	1	1.01046
35	R	0	1035	1	1.01046
35	S	8	1887	0.994319	1.00452
35	T	0	472	1	1.01046
35	W	9	157	0.928284	0.935444
35	Y	0	139	1	1.01046
36	*	2745	161	0.0417053	0.00805992
36	A	0	8387	1	1.01046
36	C	0	4668	1	1.01046
36	D	6402	26	0.00300441	-0.0324222
36	E	10682	105	0.00724084	-0.0279908
36	F	10166	900	0.061641	0.0289132
36	G	19130	1223	0.0452889	0.0118085
36	H	21622	1595	0.0518955	0.0187191
36	I	0	2540	1	1.01046
36	K	8234	84	0.0075128	-0.0277063
36	L	0	5847	1	1.01046
36	M	71	7988	0.988163	0.998078
36	N	5269	319	0.0429919	0.00940574
36	P	5896	675	0.0782971	0.0463359
36	Q	11411	33	0.00214125	-0.0333251
36	R	13491	438	0.0235234	-0.0109588
36	S	6343	806	0.0861624	0.0545632
36	T	0	5598	1	1.01046
36	W	5257	0	0	-0.0355649
36	Y	10179	1573	0.10287	0.0720395
37	*	3999	0	0	-0.0355649
37	A	0	1545	1	1.01046
37	C	0	0
37	D	183	16163	0.984971	0.994739
37	E	0	907	1	1.01046
37	F	0	574	1	1.01046
37	G	130	4334	0.961146	0.969818
37	H	0	304	1	1.01046
37	I	0	244	1	1.01046
37	K	0	1677	1	1.01046
37	L	0	597	1	1.01046
37	M	0	1454	1	1.01046
37	N	13	3616	0.995178	1.00542
37	P	1761	72	0.0294444	-0.00476532
37	Q	620	2068	0.712226	0.709442
37	R	0	1753	1	1.01046
37	S	0	344	1	1.01046
37	T	0	271	1	1.01046
37	V	0	80
37	W	0	160	1	1.01046
38	*	6633	278	0.0301608	-0.00401589
38	A	0	223	1	1.01046
38	D	1235	0	0	-0.0355649
38	E	5427	117	0.015745	-0.0190952
38	F	7	1379	0.993205	1.00335
38	G	21	1956	0.985737	0.995541
38	H	8	1373	0.992209	1.00231
38	I	0	3699	1	1.01046
38	K	3297	44	0.00980534	-0.0253082
38	L	14	428	0.957778	0.966295
38	M	80	1114	0.911758	0.918157
38	N	39	3824	0.986442	0.996278
38	Q	255	10397	0.968004	0.976991
38	R	2326	551	0.149495	0.120811
38	V	28	874	0.958611	0.967167
38	W	3925	80	0.0148984	-0.0199807
38	Y	1402	227	0.107254	0.0766257
39	*	6267	29	0.00342183	-0.0319855
39	A	0	5899	1	1.01046
39	C	0	2722	1	1.01046
39	D	13643	2189	0.106388	0.0757198
39	E	6497	719	0.0758841	0.0438118
39	F	8353	482	0.0410587	0.00738356
39	G	184	16987	0.985612	0.99541
39	H	16969	1975	0.0794959	0.0475899
39	I	7927	878	0.0759438	0.0438743
39	K	8189	1011	0.0839194	0.052217
39	L	22149	78	0.00260625	-0.0328387
39	M	8835	837	0.0656786	0.0331366
39	N	384	1720	0.76871	0.768525
39	Q	4480	0	0	-0.0355649
39	R	17231	0	0	-0.0355649
39	S	1293	21470	0.92493	0.931935
39	T	388	15382	0.967123	0.97607
39	V	134	20904	0.991435	1.0015
39	W	8275	237	0.0208092	-0.0137979
39	Y	7921	0	0	-0.0355649
40	*	16898	290	0.0125741	-0.0224121
40	A	11796	938	0.0557159	0.0227154
40	C	33151	2610	0.0551944	0.0221698
40	D	24221	3104	0.0868336	0.0552653
40	E	13201	6607	0.270802	0.247701
40	F	13945	2421	0.114119	0.083807
40	G	31295	2091	0.047236	0.0138452
40	H	24543	950	0.0279194	-0.00636042
40	I	11721	361	0.0223428	-0.0121937
40	K	19170	4112	0.137308	0.108063
40	L	20653	3090	0.0999226	0.0689567
40	M	11891	986	0.057961	0.0250638
40	N	15956	637	0.0287704	-0.0054703
40	P	8623	417	0.0346398	0.000669257
40	Q	11676	150	0.00944246	-0.0256878
40	S	16294	686	0.0302932	-0.0038774
40	T	12853	468	0.026307	-0.00804704
40	V	22765	551	0.0176426	-0.0171103
40	W	21610	624	0.0209764	-0.013623
40	Y	8417	2059	0.153628	0.125133
41	*	10107	264	0.0190131	-0.0156767
41	A	15266	1364	0.0621755	0.0294723
41	C	17202	484	0.0204504	-0.0141732
41	D	26464	1561	0.0419326	0.00829771
41	E	23996	857	0.0258161	-0.00856052
41	F	13801	318	0.0168098	-0.0179814
41	G	16701	535	0.0232176	-0.0112786
41	I	22109	1189	0.0383732	0.00457445
41	K	11775	958	0.056932	0.0239874
41	L	16528	766	0.0332455	-0.000789208
41	M	16996	452	0.0193515	-0.0153227
41	N	20242	1298	0.0454195	0.0119451
41	P	19281	722	0.0270342	-0.00728639
41	Q	15044	356	0.0172558	-0.0175148
41	R	12614	930	0.0518689	0.0186913
41	S	16915	689	0.0293376	-0.00487704
41	T	14191	70	0.00364676	-0.0317503
41	V	12858	777	0.0429148	0.00932506
41	W	26044	1876	0.0507365	0.0175068
41	Y	20204	877	0.0312035	-0.00292521
42	*	17995	118	0.00484206	-0.0304999
42	A	13	6492	0.997309	1.00764
42	C	19	15292	0.998328	1.00871
42	D	23992	1799	0.0527058	0.0195667
42	E	14728	1157	0.0550799	0.0220501
42	F	1990	41913	0.939861	0.947553
42	G	39	29494	0.998221	1.0086
42	H	21209	112	0.00390308	-0.0314821
42	I	0	7795	1	1.01046
42	K	14079	292	0.0151561	-0.0197112
42	L	9	8796	0.998623	1.00902
42	M	168	37873	0.994057	1.00424
42	N	9516	27747	0.683901	0.679813
42	P	26043	3940	0.100927	0.0700076
42	Q	20073	2918	0.0973631	0.0662794
42	R	20049	1153	0.0409258	0.00724457
42	S	110	16091	0.990871	1.00091
42	T	38	25516	0.997997	1.00837
42	W	24124	1646	0.0481881	0.0148411
42	Y	12597	689	0.0390017	0.00523187
43	*	21740	3128	0.0964632	0.065338
43	A	0	4380	1	1.01046
43	C	0	3978	1	1.01046
43	D	13992	8914	0.320983	0.300191
43	E	1901	28599	0.917783	0.924459
43	F	11	6594	0.997757	1.00811
43	G	58	18118	0.995704	1.00597
43	H	395	3923	0.880517	0.885478
43	K	1433	47172	0.96067	0.96932
43	L	0	4109	1	1.01046
43	M	17	3479	0.993458	1.00362
43	N	61	26777	0.996939	1.00726
43	P	12471	6746	0.286417	0.264034
43	Q	106	17773	0.992026	1.00212
43	R	2930	42105	0.914258	0.920772
43	S	75	9891	0.989884	0.999879
43	T	0	5556	1	1.01046
43	V	0	2529	1	1.01046
43	W	3577	47713	0.908236	0.914473
43	Y	0	9879	1	1.01046
44	*	20912	496	0.0172949	-0.017474
44	A	0	5198	1	1.01046
44	D	3361	29980	0.868744	0.873163
44	E	9957	21667	0.61754	0.610397
44	F	1410	20889	0.916616	0.923239
44	G	85	7817	0.985557	0.995353
44	H	2560	23766	0.873233	0.877859
44	I	25	5347	0.993738	1.00391
44	K	6622	49578	0.847452	0.850891
44	L	0	1739	1	1.01046
44	M	60	17382	0.99537	1.00562
44	N	0	6136	1	1.01046
44	P	3569	37996	0.887634	0.892923
44	Q	1006	25758	0.949997	0.958155
44	R	3591	13847	0.741013	0.739554
44	S	1	8703	0.999845	1.0103
44	T	42	8871	0.99366	1.00383
44	V	0	5659	1	1.01046
44	W	682	29794	0.970074	0.979157
44	Y	2289	21682	0.875444	0.880171
45	*	25342	957	0.027257	-0.00705338
45	A	0	1571	1	1.01046
45	C	0	983	1	1.01046
45	D	11	2288	0.993562	1.00373
45	E	0	2869	1	1.01046
45	F	0	3451	1	1.01046
45	G	0	948	1	1.01046
45	H	7	1991	0.995284	1.00553
45	I	0	2373	1	1.01046
45	K	1	576	0.997666	1.00802
45	L	326	2394	0.844937	0.84826
45	M	0	1181	1	1.01046
45	N	10	2317	0.994217	1.00441
45	P	94	16128	0.992206	1.00231
45	Q	0	2158	1	1.01046
45	R	0	1077	1	1.01046
45	S	0	1512	1	1.01046
45	V	0	1334	1	1.01046
45	W	21	10710	0.997364	1.0077
45	Y	0	3638	1	1.01046
46	*	18556	904	0.0348875	0.000928396
46	C	1	981	0.998628	1.00903
46	D	0	4897	1	1.01046
46	E	0	1654	1	1.01046
46	F	1	409	0.996716	1.00702
46	G	95	847	0.86869	0.873107
46	H	0	1668	1	1.01046
46	I	0	246	1	1.01046
46	K	0	1415	1	1.01046
46	L	0	481	1	1.01046
46	M	0	840	1	1.01046
46	N	0	3245	1	1.01046
46	P	0	302	1	1.01046
46	Q	0	941	1	1.01046
46	R	0	938	1	1.01046
46	T	105	1285	0.900801	0.906696
46	V	0	954	1	1.01046
46	W	0	1191	1	1.01046
46	Y	476	487	0.431545	0.415842
47	*	11407	818	0.0505214	0.0172818
47	A	0	434	1	1.01046
47	C	21	1670	0.983335	0.993029
47	D	0	366	1	1.01046
47	F	0	1536	1	1.01046
47	G	0	664	1	1.01046
47	H	12	892	0.982192	0.991833
47	I	0	647	1	1.01046
47	K	10	1474	0.99094	1.00098
47	L	0	1618	1	1.01046
47	M	9	1012	0.988157	0.998072
47	N	0	387	1	1.01046
47	P	0	3306	1	1.01046
47	Q	0	1836	1	1.01046
47	R	0	750	1	1.01046
47	S	0	1811	1	1.01046
47	T	9	2002	0.993978	1.00416
47	V	8	1866	0.994255	1.00445
47	W	0	468	1	1.01046
47	Y	7	333	0.972451	0.981643
48	*	5187	134	0.0188084	-0.0158908
48	A	0	1327	1	1.01046
48	C	12	1240	0.987126	0.996993
48	E	0	256	1	1.01046
48	F	162	8345	0.974504	0.983791
48	G	99	2257	0.944185	0.952076
48	H	0	1741	1	1.01046
48	I	45	5158	0.988379	0.998304
48	K	24	1196	0.973668	0.982916
48	L	68	4835	0.981398	0.991003
48	M	16	3091	0.993072	1.00321
48	N	0	1281	1	1.01046
48	P	113	4456	0.966953	0.975892
48	Q	0	486	1	1.01046
48	R	0	2867	1	1.01046
48	S	0	1017	1	1.01046
48	T	0	786	1	1.01046
48	V	9	1205	0.990035	1.00004
48	W	38	1147	0.957259	0.965752
48	Y	0	4952	1	1.01046
49	*	15312	78	0.00376559	-0.031626
49	A	0	3766	1	1.01046
49	C	0	3040	1	1.01046
49	D	498	16438	0.960772	0.969427
49	E	356	12868	0.964055	0.972861
49	F	0	4525	1	1.01046
49	G	351	14980	0.969388	0.97844
49	H	130	11243	0.984656	0.99441
49	I	0	7761	1	1.01046
49	K	35	3580	0.986996	0.996857
49	L	0	738	1	1.01046
49	N	57	4546	0.983383	0.993078
49	P	628	9207	0.915814	0.922399
49	Q	4	6023	0.999106	1.00952
49	R	12	6585	0.99755	1.0079
49	S	8	9128	0.99882	1.00923
49	T	20	2016	0.986806	0.996659
49	V	42	1531	0.964347	0.973166
49	W	326	27791	0.984437	0.994181
49	Y	87	14694	0.992084	1.00218
50	*	18813	763	0.0292145	-0.00500577
50	A	0	430	1	1.01046
50	C	0	725	1	1.01046
50	D	13	720	0.976245	0.985612
50	E	0	996	1	1.01046
50	F	0	367	1	1.01046
50	G	0	633	1	1.01046
50	H	232	177	0.361471	0.342543
50	I	0	2177	1	1.01046
50	K	5	621	0.989265	0.999232
50	M	0	310	1	1.01046
50	N	0	388	1	1.01046
50	P	0	385	1	1.01046
50	Q	0	202	1	1.01046
50	R	5	321	0.979439	0.988953
50	S	191	336	0.566219	0.556715
50	T	3	690	0.994175	1.00437
50	V	0	903	1	1.01046
50	W	0	331	1	1.01046
50	Y	0	669	1	1.01046
51	*	31206	597	0.0139966	-0.020924
51	A	0	570	1	1.01046
51	C	0	1856	1	1.01046
51	D	20	2432	0.989038	0.998994
51	E	4	2168	0.99752	1.00787
51	F	0	3321	1	1.01046
51	G	63	7755	0.98917	0.999132
51	H	0	1687	1	1.01046
51	I	22	5509	0.994647	1.00486
51	K	9	3981	0.996962	1.00728
51	L	4	7527	0.999284	1.00971
51	M	0	1667	1	1.01046
51	P	7292	38709	0.797525	0.798667
51	Q	33	3612	0.987837	0.997737
51	R	58	1784	0.958024	0.966552
51	S	0	3700	1	1.01046
51	T	15	3765	0.994659	1.00487
51	V	17	8263	0.997235	1.00757
51	W	0	2714	1	1.01046
51	Y	43	3468	0.983564	0.993268
52	*	15412	860	0.0397584	0.00602339
52	A	118	15076	0.989562	0.999542
52	C	274	11556	0.969035	0.97807
52	D	95	28970	0.9956	1.00586
52	E	156	25012	0.991664	1.00174
52	F	290	17214	0.9778	0.987238
52	G	71	10297	0.990793	1.00083
52	H	399	19737	0.973478	0.982717
52	I	111	18631	0.992035	1.00213
52	K	422	21046	0.973688	0.982937
52	L	301	16677	0.976253	0.985621
52	M	31	9676	0.995701	1.00596
52	N	621	30213	0.973046	0.982266
52	Q	111	14418	0.989731	0.999719
52	R	825	26927	0.960346	0.968981
52	S	96	11342	0.988722	0.998663
52	T	74	16134	0.993857	1.00403
52	V	168	16563	0.986515	0.996354
52	W	150	23160	0.991347	1.00141
52	Y	317	16386	0.97459	0.983881
53	*	9314	659	0.0498811	0.016612
53	A	0	658	1	1.01046
53	C	42	1496	0.963543	0.972325
53	D	7	1477	0.993653	1.00382
53	E	29	1744	0.978081	0.987533
53	F	4	2535	0.997878	1.00824
53	G	64	6766	0.987413	0.997293
53	H	0	1566	1	1.01046
53	I	0	1314	1	1.01046
53	K	20	996	0.973651	0.982898
53	L	0	2327	1	1.01046
53	M	16	686	0.969525	0.978582
53	P	13	899	0.980884	0.990465
53	Q	0	1505	1	1.01046
53	R	19	1281	0.980403	0.989961
53	S	0	1948	1	1.01046
53	T	1	4382	0.999693	1.01014
53	V	0	1533	1	1.01046
53	W	0	3189	1	1.01046
53	Y	0	1610	1	1.01046
54	*	23885	314	0.00966044	-0.0254598
54	A	11517	18534	0.544231	0.533714
54	C	7720	37360	0.782176	0.782611
54	D	10341	8475	0.378154	0.359994
54	E	13877	15815	0.458181	0.443703
54	F	0	7957	1	1.01046
54	G	7987	15314	0.587237	0.5787
54	H	282	29983	0.987483	0.997367
54	I	4540	32359	0.840984	0.844126
54	K	7379	13299	0.572157	0.562925
54	L	5722	37040	0.827682	0.830211
54	M	557	27746	0.973658	0.982906
54	N	12347	13426	0.446551	0.431539
54	P	3789	19824	0.795173	0.796206
54	Q	13586	17529	0.489107	0.476053
54	R	16598	17041	0.432403	0.416739
54	S	3446	9967	0.68215	0.677981
54	T	11227	16311	0.518772	0.507083
54	V	5840	35394	0.818083	0.820171
54	W	23	12736	0.997572	1.00792
55	*	20034	806	0.0289868	-0.00524389
55	A	60	3219	0.975495	0.984828
55	C	0	1685	1	1.01046
55	D	22	2487	0.988219	0.998137
55	F	0	1673	1	1.01046
55	G	33	1501	0.971223	0.980359
55	H	319	2257	0.839997	0.843093
55	I	0	1946	1	1.01046
55	K	10	761	0.982599	0.992258
55	L	14	1998	0.990645	1.00067
55	M	0	1505	1	1.01046
55	N	15	1343	0.985171	0.994949
55	P	8	1312	0.991849	1.00193
55	Q	1	2070	0.999349	1.00978
55	R	181	2276	0.903199	0.909204
55	S	18	1724	0.986124	0.995946
55	T	0	1780	1	1.01046
55	V	22	2372	0.987655	0.997547
55	W	0	871	1	1.01046
55	Y	0	1365	1	1.01046
56	*	18459	870	0.0337902	-0.000219441
56	A	0	1565	1	1.01046
56	C	19	1112	0.977491	0.986915
56	E	0	1549	1	1.01046
56	F	0	697	1	1.01046
56	G	0	816	1	1.01046
56	H	1	1458	0.999077	1.00949
56	I	95	1225	0.905375	0.91148
56	K	114	1672	0.915845	0.922432
56	L	0	1438	1	1.01046
56	M	0	722	1	1.01046
56	N	0	946	1	1.01046
56	P	25	7807	0.995703	1.00597
56	Q	0	1563	1	1.01046
56	R	0	1511	1	1.01046
56	S	0	1909	1	1.01046
56	T	0	992	1	1.01046
56	V	1826	1629	0.398299	0.381066
56	W	0	592	1	1.01046
56	Y	0	1487	1	1.01046
57	*	21291	1337	0.044521	0.0110052
57	A	338	15149	0.970808	0.979925
57	C	74	7992	0.987675	0.997568
57	D	165	15018	0.985409	0.995198
57	E	8	4722	0.997722	1.00808
57	F	57	15067	0.994927	1.00515
57	G	302	14565	0.972816	0.982025
57	H	1528	4039	0.662318	0.657237
57	I	0	3478	1	1.01046
57	K	18	6211	0.996109	1.00639
57	M	31	4049	0.989787	0.999777
57	N	166	3353	0.937452	0.945033
57	P	727	18553	0.949839	0.957991
57	Q	25	8077	0.995846	1.00611
57	R	0	13677	1	1.01046
57	S	27	2221	0.983881	0.993599
57	T	97	6677	0.980797	0.990374
57	V	69	4860	0.981225	0.990821
57	W	130	33367	0.994777	1.005
57	Y	8	10179	0.998942	1.00935
58	*	21648	2081	0.0665794	0.0340789
58	A	35	5349	0.991259	1.00132
58	C	161	4721	0.956059	0.964497
58	D	19	16517	0.998452	1.00884
58	E	0	3613	1	1.01046
58	F	0	833	1	1.01046
58	G	77	21524	0.995202	1.00544
58	H	0	1476	1	1.01046
58	I	0	1206	1	1.01046
58	K	27	15709	0.997689	1.00804
58	M	42	5574	0.989947	0.999945
58	N	19	3160	0.991962	1.00205
58	P	921	35471	0.96619	0.975095
58	Q	70	3377	0.972824	0.982033
58	R	0	5807	1	1.01046
58	S	27	3585	0.989952	0.99995
58	T	0	7611	1	1.01046
58	V	19	2343	0.989189	0.999152
58	W	0	3609	1	1.01046
58	Y	32	2130	0.980155	0.989702
59	*	20010	396	0.0144719	-0.0204269
59	A	193	705	0.73049	0.728546
59	C	0	4216	1	1.01046
59	D	16	777	0.972998	0.982215
59	E	0	1570	1	1.01046
59	F	0	840	1	1.01046
59	G	16	3930	0.994543	1.00475
59	H	0	1096	1	1.01046
59	K	10	1458	0.990841	1.00088
59	L	0	3376	1	1.01046
59	M	0	1974	1	1.01046
59	N	1	2444	0.999449	1.00988
59	P	0	6788	1	1.01046
59	Q	0	1573	1	1.01046
59	R	25	1688	0.980431	0.98999
59	S	0	1865	1	1.01046
59	T	0	1104	1	1.01046
59	V	0	2579	1	1.01046
59	W	0	1727	1	1.01046
59	Y	0	2136	1	1.01046
60	*	13074	1888	0.096782	0.0656715
60	A	2	2222	0.998788	1.00919
60	C	0	573	1	1.01046
60	D	0	2318	1	1.01046
60	E	0	1253	1	1.01046
60	F	11	2361	0.99376	1.00393
60	G	0	1060	1	1.01046
60	H	33	1139	0.962421	0.971152
60	I	109	1726	0.921566	0.928416
60	K	0	1060	1	1.01046
60	L	42	1725	0.968229	0.977227
60	M	0	3020	1	1.01046
60	N	136	3037	0.943084	0.950924
60	P	27	4140	0.991287	1.00135
60	Q	8	1927	0.994436	1.00464
60	S	99	2657	0.952186	0.960445
60	T	159	1100	0.836958	0.839914
60	V	139	1656	0.898374	0.904157
60	W	7	1925	0.995123	1.00536
60	Y	28	844	0.957203	0.965694
61	*	15321	1796	0.0800213	0.0481394
61	A	67	7538	0.988163	0.998079
61	C	0	2520	1	1.01046
61	D	264	18147	0.980771	0.990346
61	E	197	4309	0.941962	0.949751
61	F	0	2566	1	1.01046
61	G	0	8401	1	1.01046
61	H	8	2579	0.995837	1.00611
61	I	50	3017	0.978153	0.987608
61	L	102	2936	0.955274	0.963675
61	M	0	4008	1	1.01046
61	N	314	4697	0.917351	0.924008
61	P	414	22365	0.97566	0.985
61	Q	41	3015	0.982003	0.991635
61	R	0	1175	1	1.01046
61	S	38	3937	0.987159	0.997028
61	T	6	3354	0.997595	1.00794
61	V	156	3463	0.942764	0.95059
61	W	14	2059	0.99092	1.00096
61	Y	36	3691	0.987026	0.996889
62	*	23470	1478	0.0446412	0.011131
62	A	0	1648	1	1.01046
62	C	0	1450	1	1.01046
62	D	0	790	1	1.01046
62	E	0	1660	1	1.01046
62	F	24	651	0.952667	0.960949
62	G	5	1171	0.994278	1.00448
62	H	0	1116	1	1.01046
62	I	20	1441	0.981638	0.991254
62	K	0	1866	1	1.01046
62	L	20	1383	0.980883	0.990464
62	M	0	1210	1	1.01046
62	N	3	1289	0.996873	1.00719
62	P	0	7404	1	1.01046
62	Q	13	1626	0.98934	0.99931
62	R	0	661	1	1.01046
62	T	12	1145	0.986072	0.995892
62	V	9	2045	0.994104	1.00429
62	W	0	3266	1	1.01046
62	Y	13	2086	0.991671	1.00175
63	*	24235	224	0.00681154	-0.0284398
63	A	7	3403	0.997235	1.00757
63	C	0	4996	1	1.01046
63	D	0	1225	1	1.01046
63	E	152	5827	0.966039	0.974936
63	F	72	3304	0.971469	0.980616
63	G	0	5601	1	1.01046
63	H	16	2156	0.990098	1.0001
63	I	0	2793	1	1.01046
63	K	90	3228	0.963786	0.972579
63	L	351	2082	0.81486	0.816799
63	M	10	5611	0.997604	1.00795
63	P	27	6039	0.994011	1.0042
63	Q	16	4362	0.995081	1.00531
63	R	0	2876	1	1.01046
63	S	5	2549	0.997363	1.0077
63	T	0	4131	1	1.01046
63	V	437	4969	0.894036	0.899619
63	W	0	6695	1	1.01046
63	Y	35	7171	0.993465	1.00362
64	*	14868	926	0.044172	0.0106401
64	A	25	2094	0.984165	0.993896
64	C	27	1434	0.975253	0.984574
64	D	0	1114	1	1.01046
64	E	7	1587	0.994091	1.00428
64	F	0	2661	1	1.01046
64	G	225	1610	0.841508	0.844674
64	I	0	1406	1	1.01046
64	K	0	1414	1	1.01046
64	L	0	113	1	1.01046
64	M	50	1858	0.965002	0.973851
64	N	0	1367	1	1.01046
64	P	2	1633	0.998352	1.00874
64	Q	0	1156	1	1.01046
64	R	1498	453	0.183264	0.156134
64	S	24	1518	0.979137	0.988637
64	T	10	3077	0.995639	1.0059
64	V	17	1361	0.983445	0.993143
64	W	31	1396	0.970942	0.980065
64	Y	24	1175	0.97321	0.982437
65	*	14090	300	0.0155529	-0.0192961
65	A	21	4251	0.993386	1.00354
65	C	0	1337	1	1.01046
65	D	54	2586	0.972628	0.981829
65	E	126	2703	0.940891	0.948631
65	F	0	2751	1	1.01046
65	G	0	3525	1	1.01046
65	H	0	790	1	1.01046
65	I	0	3546	1	1.01046
65	K	18	4499	0.994637	1.00485
65	L	43	4165	0.986277	0.996106
65	M	4	1141	0.995298	1.00554
65	P	7	6285	0.998501	1.00889
65	Q	6	1613	0.995012	1.00524
65	R	0	4124	1	1.01046
65	S	0	855	1	1.01046
65	T	766	2321	0.692147	0.688438
65	V	0	2193	1	1.01046
65	W	8	2101	0.994895	1.00512
65	Y	0	1904	1	1.01046
66	*	22306	441	0.0144577	-0.0204417
66	A	7426	22755	0.694534	0.690935
66	C	207	29858	0.990743	1.00078
66	D	15852	182	0.00844718	-0.0267289
66	E	23732	2720	0.0783783	0.0464208
66	G	16467	2021	0.0834659	0.0517425
66	H	11693	20810	0.569068	0.559694
66	I	40	7946	0.993261	1.00341
66	K	21691	13207	0.311193	0.289951
66	L	60	9095	0.991188	1.00124
66	M	5	7484	0.9991	1.00952
66	N	17086	490	0.0208362	-0.0137696
66	P	4503	29748	0.830563	0.833225
66	Q	11597	2379	0.132106	0.102622
66	R	6006	309	0.0367715	0.00289902
66	S	14094	6566	0.256882	0.23314
66	T	268	16849	0.979013	0.988508
66	V	253	18011	0.981421	0.991026
66	W	24	4732	0.993211	1.00336
66	Y	0	3999	1	1.01046
67	*	24471	1272	0.0371371	0.00328151
67	A	2	1669	0.998388	1.00877
67	C	0	2062	1	1.01046
67	D	34	789	0.945112	0.953046
67	E	0	1399	1	1.01046
67	F	59	1537	0.950811	0.959008
67	G	19	2340	0.989176	0.999138
67	H	0	2499	1	1.01046
67	I	0	1180	1	1.01046
67	K	26	3381	0.989742	0.999731
67	M	10	1470	0.990915	1.00096
67	N	0	1247	1	1.01046
67	P	2325	6223	0.665107	0.660154
67	Q	8	2862	0.996247	1.00653
67	R	0	1761	1	1.01046
67	S	83	2717	0.960458	0.969098
67	T	0	2108	1	1.01046
67	V	0	2152	1	1.01046
67	W	21	1549	0.982057	0.991691
67	Y	49	2485	0.974114	0.983382
68	*	12071	387	0.0232362	-0.0112592
68	A	0	2785	1	1.01046
68	C	5	1336	0.994982	1.00521
68	D	28259	954	0.0244374	-0.0100027
68	E	24586	1038	0.0303754	-0.00379146
68	F	12727	5189	0.232262	0.207387
68	G	21630	5354	0.155168	0.126744
68	H	24791	356	0.0105429	-0.0245367
68	I	19	1601	0.984258	0.993994
68	K	17518	17	0.000719549	-0.0348122
68	L	0	2759	1	1.01046
68	M	38	11622	0.995613	1.00587
68	N	29258	1947	0.0470542	0.013655
68	P	562	22148	0.966933	0.975872
68	Q	19612	686	0.0252978	-0.00910273
68	R	29248	396	0.00994641	-0.0251607
68	S	5481	15339	0.674962	0.670463
68	T	29	6791	0.994278	1.00447
68	W	17642	2431	0.0927614	0.0614659
68	Y	33451	1745	0.037265	0.00341531
69	*	28712	1807	0.0446151	0.0111036
69	A	0	1965	1	1.01046
69	C	0	1387	1	1.01046
69	D	28	3299	0.988691	0.998631
69	E	28	2090	0.982265	0.991909
69	F	8	1465	0.992694	1.00282
69	G	70	2341	0.961263	0.96994
69	H	0	1527	1	1.01046
69	I	0	1602	1	1.01046
69	K	0	520	1	1.01046
69	L	0	827	1	1.01046
69	M	0	1989	1	1.01046
69	N	73	2404	0.960685	0.969336
69	P	3331	15952	0.780386	0.780738
69	R	21	2011	0.986122	0.995943
69	S	29	2348	0.983627	0.993334
69	T	0	1433	1	1.01046
69	V	0	671	1	1.01046
69	W	0	2155	1	1.01046
69	Y	0	1397	1	1.01046
70	*	11718	1056	0.062677	0.0299969
70	C	3075	276	0.0624412	0.0297502
70	D	294	1666	0.807866	0.809484
70	E	225	3674	0.923758	0.930709
70	F	10	1528	0.991257	1.00131
70	G	0	2124	1	1.01046
70	H	273	1228	0.769462	0.769312
70	I	0	1121	1	1.01046
70	K	0	1820	1	1.01046
70	L	0	2351	1	1.01046
70	M	0	1163	1	1.01046
70	N	31	1142	0.964707	0.973543
70	P	54	5681	0.987352	0.99723
70	Q	237	3595	0.918403	0.925108
70	R	32	2093	0.979811	0.989342
70	S	0	804	1	1.01046
70	T	0	1418	1	1.01046
70	V	24	2710	0.988205	0.998123
70	W	0	1383	1	1.01046
70	Y	0	3391	1	1.01046
71	*	13425	276	0.0150255	-0.0198478
71	A	0	1457	1	1.01046
71	C	1	1970	0.999316	1.00975
71	D	0	2799	1	1.01046
71	E	21	1794	0.984469	0.994215
71	F	62	2798	0.971003	0.980128
71	H	105	1592	0.918369	0.925072
71	I	148	2204	0.917012	0.923652
71	K	0	1866	1	1.01046
71	L	49	3195	0.97975	0.989278
71	M	101	2524	0.94883	0.956936
71	N	6	2890	0.99721	1.00754
71	P	4	4849	0.99889	1.0093
71	Q	24	1217	0.974111	0.983379
71	R	0	1482	1	1.01046
71	S	73	3698	0.974085	0.983353
71	T	0	3030	1	1.01046
71	V	0	2264	1	1.01046
71	W	0	4765	1	1.01046
71	Y	0	2870	1	1.01046
72	*	19074	143	0.00553214	-0.0297781
72	A	0	2068	1	1.01046
72	C	14	1708	0.989074	0.999031
72	D	14	896	0.979377	0.988888
72	E	35	2202	0.979028	0.988523
72	F	26	863	0.960982	0.969646
72	G	105	486	0.774492	0.774573
72	H	7	1127	0.991699	1.00178
72	I	15	1571	0.987296	0.997171
72	K	5	1539	0.995641	1.0059
72	L	8	4239	0.997463	1.00781
72	M	0	3059	1	1.01046
72	P	4	1651	0.996745	1.00706
72	Q	0	956	1	1.01046
72	R	14	1611	0.988424	0.998351
72	S	0	2061	1	1.01046
72	T	0	1824	1	1.01046
72	V	39	2249	0.977163	0.986572
72	W	0	1651	1	1.01046
72	Y	0	1737	1	1.01046
73	*	14823	1177	0.0556399	0.0226359
73	A	24	3683	0.991294	1.00135
73	C	184	3758	0.938099	0.94571
73	D	56	2629	0.972094	0.98127
73	E	0	438	1	1.01046
73	F	7	2244	0.995814	1.00608
73	G	13	2368	0.992656	1.00278
73	H	85	1769	0.939182	0.946843
73	I	0	806	1	1.01046
73	K	0	1337	1	1.01046
73	L	10	2121	0.993686	1.00386
73	M	0	1889	1	1.01046
73	N	0	1551	1	1.01046
73	P	241	8834	0.964537	0.973366
73	Q	0	1161	1	1.01046
73	R	6	1577	0.994899	1.00512
73	S	15	1767	0.988689	0.998629
73	T	0	1532	1	1.01046
73	W	0	738	1	1.01046
73	Y	0	2630	1	1.01046
74	*	28670	1867	0.0460926	0.0126492
74	A	55	204	0.733488	0.731682
74	C	116	1461	0.903339	0.909351
74	D	0	2050	1	1.01046
74	E	237	2867	0.89976	0.905607
74	F	0	2491	1	1.01046
74	G	20	2916	0.990841	1.00088
74	H	0	1509	1	1.01046
74	I	0	2286	1	1.01046
74	K	0	1162	1	1.01046
74	L	15	697	0.971814	0.980977
74	M	0	2467	1	1.01046
74	N	0	1652	1	1.01046
74	P	0	944	1	1.01046
74	R	17	1540	0.985341	0.995127
74	S	5	2462	0.99727	1.00761
74	T	151	498	0.709905	0.707014
74	V	25	1587	0.979211	0.988715
74	W	0	2982	1	1.01046
74	Y	0	625	1	1.01046
75	*	14275	0	0	-0.0355649
75	A	13	4499	0.996121	1.0064
75	C	0	2998	1	1.01046
75	D	9923	12633	0.485769	0.472562
75	E	302	34841	0.988453	0.998382
75	F	6	3162	0.997449	1.00779
75	G	102	12588	0.989198	0.999161
75	H	31	5385	0.992301	1.00241
75	I	0	704	1	1.01046
75	K	15	2256	0.991119	1.00117
75	M	0	1818	1	1.01046
75	N	23	9344	0.996694	1.007
75	P	0	1747	1	1.01046
75	Q	22	3424	0.991415	1.00148
75	R	28	6297	0.994043	1.00423
75	S	177	10784	0.978359	0.987823
75	T	12	6186	0.997392	1.00773
75	V	69	2754	0.967337	0.976294
75	W	0	9455	1	1.01046
75	Y	9	2669	0.995476	1.00573
76	*	24701	481	0.0142432	-0.0206661
76	A	13	1657	0.989537	0.999516
76	C	0	1564	1	1.01046
76	D	43	4986	0.988511	0.998442
76	E	15	2424	0.991729	1.00181
76	F	0	1570	1	1.01046
76	G	59	1873	0.959276	0.967862
76	H	0	799	1	1.01046
76	I	0	2040	1	1.01046
76	K	0	812	1	1.01046
76	L	0	2190	1	1.01046
76	M	0	1868	1	1.01046
76	N	61	2680	0.970238	0.979328
76	P	0	1720	1	1.01046
76	Q	0	963	1	1.01046
76	S	0	2934	1	1.01046
76	T	0	1511	1	1.01046
76	V	8	2842	0.996221	1.00651
76	W	0	3033	1	1.01046
76	Y	0	1466	1	1.01046
77	*	18313	0	0	-0.0355649
77	A	172	6465	0.965386	0.974253
77	C	0	2139	1	1.01046
77	D	228	18554	0.983709	0.993419
77	E	340	41024	0.988954	0.998906
77	F	626	27065	0.969771	0.97884
77	G	150	14396	0.986152	0.995975
77	H	94	19181	0.993439	1.0036
77	I	246	899	0.730578	0.728638
77	K	237	21243	0.985187	0.994965
77	L	93	4572	0.973318	0.98255
77	M	104	6977	0.980307	0.989861
77	N	75	10524	0.990487	1.00051
77	P	51	4267	0.984147	0.993878
77	Q	535	21753	0.967918	0.976901
77	R	338	8273	0.947812	0.955871
77	S	30	10704	0.996237	1.00652
77	T	0	2750	1	1.01046
77	W	607	41034	0.980454	0.990014
77	Y	340	31521	0.985671	0.995472
78	*	19952	887	0.0319338	-0.00216129
78	A	0	1110	1	1.01046
78	C	59	1505	0.949818	0.957969
78	D	0	4073	1	1.01046
78	E	1	2561	0.999474	1.00991
78	F	0	2621	1	1.01046
78	G	0	5677	1	1.01046
78	H	0	4317	1	1.01046
78	K	11	2795	0.994724	1.00494
78	L	6	2080	0.996127	1.00641
78	M	1274	2194	0.560987	0.551242
78	N	14	2116	0.991162	1.00122
78	P	2963	22503	0.849291	0.852815
78	Q	39	2723	0.981063	0.990652
78	R	0	1427	1	1.01046
78	S	22	3164	0.990716	1.00075
78	T	0	1142	1	1.01046
78	V	28	1639	0.977495	0.986919
78	W	7	2083	0.995491	1.00574
78	Y	446	4084	0.871705	0.87626
79	*	28058	976	0.0251614	-0.00924543
79	A	207	1550	0.84747	0.85091
79	C	12	2763	0.994181	1.00437
79	D	0	1713	1	1.01046
79	E	95	1664	0.928555	0.935727
79	F	8	1446	0.992599	1.00272
79	H	1936	1121	0.300525	0.278792
79	I	13	4221	0.995866	1.00614
79	K	3	2730	0.998521	1.00891
79	L	0	3806	1	1.01046
79	M	0	2127	1	1.01046
79	N	0	1141	1	1.01046
79	P	11729	33160	0.677189	0.672792
79	Q	182	2109	0.895815	0.90148
79	R	0	1236	1	1.01046
79	S	0	893	1	1.01046
79	T	0	1617	1	1.01046
79	V	92	1968	0.940732	0.948464
79	W	0	2079	1	1.01046
79	Y	0	1222	1	1.01046
80	*	21672	1093	0.0360723	0.0021677
80	A	14	5903	0.996814	1.00713
80	C	0	1304	1	1.01046
80	D	37	11265	0.995593	1.00585
80	E	37	6810	0.992731	1.00286
80	F	0	1459	1	1.01046
80	G	0	4561	1	1.01046
80	I	7	1095	0.991458	1.00153
80	K	0	4401	1	1.01046
80	L	12	5518	0.997078	1.0074
80	M	0	2794	1	1.01046
80	N	0	2671	1	1.01046
80	P	269	12117	0.97095	0.980073
80	Q	27	2494	0.98562	0.995418
80	R	1	7236	0.999814	1.01027
80	S	0	3755	1	1.01046
80	T	7	2315	0.995941	1.00621
80	V	1480	1120	0.359598	0.340584
80	W	22	5861	0.994967	1.0052
80	Y	20	2441	0.989078	0.999036
81	*	15202	753	0.0354509	0.00151766
81	A	1	1681	0.999199	1.00962
81	C	0	1636	1	1.01046
81	D	0	1338	1	1.01046
81	E	0	732	1	1.01046
81	F	0	1203	1	1.01046
81	G	18	1992	0.987969	0.997875
81	H	15	1340	0.985138	0.994914
81	I	0	1051	1	1.01046
81	K	26	786	0.957322	0.965818
81	L	6	597	0.986636	0.996482
81	M	0	2016	1	1.01046
81	N	19	2845	0.99108	1.00113
81	P	41	3960	0.986239	0.996065
81	Q	20	1239	0.978709	0.988189
81	R	0	1067	1	1.01046
81	T	10	995	0.986636	0.996482
81	V	0	1362	1	1.01046
81	W	56	1826	0.960309	0.968943
81	Y	0	1685	1	1.01046
82	*	22524	1475	0.0463392	0.0129071
82	A	0	7545	1	1.01046
82	C	87	10633	0.989093	0.999052
82	D	0	6175	1	1.01046
82	E	127	18515	0.99084	1.00088
82	F	0	9779	1	1.01046
82	G	34	13946	0.996725	1.00703
82	H	19	9099	0.997194	1.00752
82	I	226	9788	0.969821	0.978893
82	K	1	11401	0.999882	1.01034
82	L	236	10754	0.971274	0.980412
82	N	10	8006	0.998319	1.0087
82	P	19	6788	0.996242	1.00653
82	Q	0	6057	1	1.01046
82	R	19	21037	0.998784	1.00919
82	S	14	12050	0.998437	1.00882
82	T	0	8918	1	1.01046
82	V	0	9175	1	1.01046
82	W	396	32705	0.983944	0.993665
82	Y	25	16597	0.997974	1.00834
83	*	20241	334	0.0120959	-0.0229123
83	A	12	1174	0.986412	0.996247
83	C	26	1789	0.98079	0.990366
83	D	0	553	1	1.01046
83	E	0	570	1	1.01046
83	F	0	1819	1	1.01046
83	G	0	1172	1	1.01046
83	H	0	749	1	1.01046
83	I	0	1663	1	1.01046
83	K	0	1643	1	1.01046
83	L	11	2262	0.993489	1.00365
83	M	0	976	1	1.01046
83	N	0	2276	1	1.01046
83	P	60	2867	0.972569	0.981767
83	R	5	2009	0.996657	1.00696
83	S	31	1553	0.973803	0.983057
83	T	0	2300	1	1.01046
83	V	70	1857	0.951654	0.95989
83	W	1	2639	0.99949	1.00993
83	Y	0	1841	1	1.01046
84	*	25323	719	0.0206332	-0.013982
84	A	48	1638	0.962008	0.970719
84	C	47	3534	0.982392	0.992042
84	D	14	1640	0.988626	0.998563
84	E	15	1496	0.986667	0.996514
84	F	1	1571	0.999143	1.00956
84	G	0	1537	1	1.01046
84	H	0	433	1	1.01046
84	I	38	3909	0.987068	0.996933
84	K	0	5025	1	1.01046
84	L	19	2269	0.988841	0.998787
84	M	0	1707	1	1.01046
84	P	4644	25173	0.800879	0.802175
84	Q	0	1171	1	1.01046
84	R	8	1777	0.993969	1.00415
84	S	0	1425	1	1.01046
84	T	14	3382	0.994452	1.00466
84	V	147	3378	0.944602	0.952512
84	W	0	3436	1	1.01046
84	Y	0	807	1	1.01046
85	*	13852	865	0.0442834	0.0107567
85	A	34	1035	0.957605	0.966114
85	D	10099	27997	0.672886	0.66829
85	E	14985	9193	0.312813	0.291645
85	F	303	16829	0.97631	0.98568
85	G	11	5827	0.997462	1.00781
85	H	45	12903	0.995322	1.00557
85	I	133	27291	0.993475	1.00363
85	K	195	4469	0.944461	0.952365
85	L	2987	13969	0.77629	0.776454
85	M	186	18602	0.986704	0.996552
85	N	153	14539	0.986016	0.995833
85	P	498	17400	0.962861	0.971611
85	Q	1022	16364	0.922365	0.929252
85	R	121	22047	0.992658	1.00278
85	S	0	1931	1	1.01046
85	T	0	3524	1	1.01046
85	V	194	25148	0.98971	0.999697
85	W	14124	0	0	-0.0355649
85	Y	1081	23525	0.941683	0.94946
86	*	13695	314	0.0167282	-0.0180667
86	A	2	610	0.995601	1.00586
86	C	0	2449	1	1.01046
86	D	0	7765	1	1.01046
86	E	0	2039	1	1.01046
86	F	8	1457	0.992655	1.00278
86	G	0	470	1	1.01046
86	H	0	1136	1	1.01046
86	I	0	1500	1	1.01046
86	K	0	4154	1	1.01046
86	L	0	302	1	1.01046
86	M	7463	603	0.0565621	0.0236005
86	N	0	1491	1	1.01046
86	P	15180	559	0.0265975	-0.00774319
86	Q	0	2487	1	1.01046
86	R	10	2314	0.99421	1.0044
86	S	0	834	1	1.01046
86	T	0	1406	1	1.01046
86	W	23784	764	0.0232802	-0.0112132
86	Y	66	6315	0.98611	0.995931
87	*	19893	1434	0.0507724	0.0175443
87	A	34	8909	0.994883	1.00511
87	C	579	5551	0.876753	0.881541
87	D	19363	5017	0.161254	0.133111
87	E	1290	43328	0.961423	0.970108
87	F	8	2783	0.996141	1.00642
87	G	2879	37135	0.9054	0.911506
87	H	1109	38163	0.962313	0.971038
87	I	314	2014	0.826366	0.828835
87	K	9227	8927	0.417888	0.401557
87	M	0	3838	1	1.01046
87	N	2000	31790	0.92184	0.928703
87	P	25429	646	0.0185013	-0.0162121
87	Q	935	39531	0.969109	0.978147
87	R	18337	434	0.0172587	-0.0175118
87	S	140	27514	0.993189	1.00334
87	T	9	7492	0.998384	1.00877
87	V	134	2243	0.925486	0.932517
87	W	1103	24049	0.941787	0.949568
87	Y	191	18008	0.985907	0.995719
88	*	23460	1652	0.049656	0.0163765
88	A	9	2085	0.994216	1.00441
88	C	0	2621	1	1.01046
88	D	33	2932	0.985058	0.994831
88	E	12	1983	0.99191	1.002
88	F	83	746	0.869607	0.874066
88	G	0	4290	1	1.01046
88	H	0	2071	1	1.01046
88	I	23	1251	0.975821	0.985169
88	L	0	1702	1	1.01046
88	M	20	1340	0.980282	0.989834
88	N	0	2498	1	1.01046
88	P	67	18359	0.995106	1.00534
88	Q	8	2328	0.99539	1.00564
88	R	6	1925	0.995817	1.00608
88	S	21	1024	0.973105	0.982327
88	T	0	813	1	1.01046
88	V	21	2122	0.986838	0.996693
88	W	79	1847	0.945498	0.95345
88	Y	0	456	1	1.01046
89	*	19269	1096	0.0404955	0.00679446
89	A	257	19796	0.982805	0.992473
89	C	41	6522	0.991599	1.00167
89	D	22249	245	0.00810457	-0.0270873
89	E	32174	1439	0.0321207	-0.00196577
89	F	0	1406	1	1.01046
89	G	23341	3769	0.106996	0.0763559
89	H	5569	6604	0.46806	0.454037
89	I	0	642	1	1.01046
89	K	28964	1222	0.0303552	-0.0038125
89	M	0	1429	1	1.01046
89	N	14604	8005	0.289128	0.26687
89	P	18565	494	0.019362	-0.0153118
89	Q	21000	4673	0.141715	0.112673
89	R	14877	235	0.0115851	-0.0234465
89	S	2980	19124	0.826443	0.828915
89	T	673	20250	0.95713	0.965617
89	V	65	4398	0.980471	0.990032
89	W	1420	51058	0.963873	0.97267
89	Y	128	18206	0.990614	1.00064
90	*	25079	701	0.0203189	-0.0143107
90	A	10	1917	0.993019	1.00316
90	C	0	1904	1	1.01046
90	D	0	2667	1	1.01046
90	E	0	1274	1	1.01046
90	F	25	1098	0.970228	0.979318
90	G	11	2391	0.993838	1.00401
90	H	27	2681	0.986609	0.996453
90	I	18	1134	0.979056	0.988552
90	L	0	914	1	1.01046
90	M	0	1399	1	1.01046
90	N	0	583	1	1.01046
90	P	4	5792	0.99907	1.00949
90	Q	0	2262	1	1.01046
90	R	141	2048	0.915093	0.921645
90	S	0	1037	1	1.01046
90	T	5	839	0.992032	1.00213
90	V	13	1528	0.988664	0.998602
90	W	28	385	0.910735	0.917087
90	Y	245	1865	0.849587	0.853124
91	*	15356	659	0.0308604	-0.00328406
91	A	0	2852	1	1.01046
91	C	0	2322	1	1.01046
91	D	18964	987	0.0371826	0.00332906
91	E	21121	1290	0.0433545	0.00978509
91	F	7754	20732	0.66487	0.659906
91	G	1461	10441	0.841339	0.844497
91	H	15999	4601	0.175861	0.14839
91	I	0	1072	1	1.01046
91	K	28866	1480	0.0366495	0.00277143
91	L	0	1449	1	1.01046
91	M	0	1852	1	1.01046
91	N	13707	7754	0.295651	0.273694
91	P	16627	21599	0.490807	0.477832
91	Q	12574	9392	0.356596	0.337444
91	R	21390	446	0.0152358	-0.0196278
91	S	26	6390	0.994546	1.00476
91	T	0	1680	1	1.01046
91	W	27001	1147	0.0305572	-0.00360121
91	Y	21782	208	0.00703571	-0.0282053
92	*	9320	200	0.0156733	-0.0191701
92	A	0	2416	1	1.01046
92	C	0	1637	1	1.01046
92	E	0	1139	1	1.01046
92	F	50	2639	0.975102	0.984416
92	G	0	301	1	1.01046
92	H	0	1394	1	1.01046
92	I	0	2573	1	1.01046
92	K	0	1009	1	1.01046
92	L	0	1040	1	1.01046
92	M	68	1177	0.927763	0.934898
92	N	0	1242	1	1.01046
92	P	35	1976	0.976685	0.986073
92	Q	0	1650	1	1.01046
92	R	0	1543	1	1.01046
92	S	0	1470	1	1.01046
92	T	18	2917	0.991752	1.00183
92	V	0	888	1	1.01046
92	W	39	1887	0.972901	0.982114
92	Y	18	1553	0.98462	0.994372
93	*	26133	425	0.0119234	-0.0230927
93	A	30	1062	0.963326	0.972098
93	C	0	1414	1	1.01046
93	D	0	2501	1	1.01046
93	E	0	1406	1	1.01046
93	F	0	1643	1	1.01046
93	G	0	1733	1	1.01046
93	H	12	1142	0.986036	0.995854
93	I	0	936	1	1.01046
93	K	0	300	1	1.01046
93	L	77	761	0.88	0.884937
93	M	28	1333	0.972471	0.981664
93	N	0	548	1	1.01046
93	P	186	5515	0.956523	0.964983
93	Q	3	2333	0.99827	1.00865
93	R	16	1789	0.98809	0.998002
93	S	8	982	0.98914	0.9991
93	V	0	1086	1	1.01046
93	W	27	1824	0.980441	0.990001
93	Y	155	1444	0.87362	0.878264
94	*	19352	1468	0.0532877	0.0201754
94	C	0	975	1	1.01046
94	D	0	2571	1	1.01046
94	E	0	1827	1	1.01046
94	F	5	1101	0.993917	1.0041
94	G	1	1907	0.999294	1.00972
94	H	98	1098	0.892629	0.898148
94	I	0	1717	1	1.01046
94	K	0	2124	1	1.01046
94	L	0	1336	1	1.01046
94	M	10	2196	0.9939	1.00408
94	N	0	2443	1	1.01046
94	P	6	2411	0.996657	1.00696
94	Q	1	1164	0.998844	1.00925
94	R	0	524	1	1.01046
94	S	0	1273	1	1.01046
94	T	0	2298	1	1.01046
94	V	0	1843	1	1.01046
94	W	27	2429	0.985241	0.995021
94	Y	0	1541	1	1.01046
95	*	24405	867	0.0256832	-0.00869959
95	A	735	26605	0.964105	0.972913
95	C	59	15533	0.994907	1.00513
95	D	913	3946	0.762299	0.761819
95	E	16092	644	0.0288387	-0.00539885
95	F	15647	11393	0.350766	0.331345
95	G	1317	27415	0.939194	0.946856
95	H	696	32287	0.971768	0.980929
95	I	22663	881	0.0280361	-0.00623842
95	K	1845	33536	0.930974	0.938257
95	L	8721	26103	0.68953	0.6857
95	M	1738	24613	0.913105	0.919565
95	P	20417	6469	0.190349	0.163545
95	Q	94	24351	0.994825	1.00505
95	R	7656	58774	0.850663	0.854251
95	S	91	21616	0.994358	1.00456
95	T	13311	3406	0.159568	0.131347
95	V	30051	2010	0.0472835	0.0138948
95	W	19527	1556	0.0558258	0.0228303
95	Y	5967	29490	0.785736	0.786335
96	*	13543	2857	0.135346	0.106011
96	A	0	946	1	1.01046
96	C	27	1488	0.97613	0.985491
96	D	0	1689	1	1.01046
96	E	0	1774	1	1.01046
96	F	0	515	1	1.01046
96	G	12	1943	0.991745	1.00183
96	H	534	1469	0.671184	0.666511
96	I	11	181	0.924296	0.931272
96	K	99	1249	0.903487	0.909505
96	L	29	884	0.95766	0.966172
96	M	12	544	0.97113	0.980261
96	N	9	1412	0.991483	1.00155
96	Q	0	1453	1	1.01046
96	R	0	1659	1	1.01046
96	S	168	1478	0.867161	0.871507
96	T	9	826	0.985528	0.995322
96	V	0	1444	1	1.01046
96	W	0	1167	1	1.01046
96	Y	13	1635	0.989398	0.99937
97	*	18156	1235	0.0480475	0.014694
97	A	0	1216	1	1.01046
97	C	44	4485	0.986951	0.996811
97	D	0	5290	1	1.01046
97	E	17	8581	0.997337	1.00767
97	F	10	6091	0.997792	1.00815
97	G	30	4562	0.991215	1.00127
97	H	0	2256	1	1.01046
97	I	0	1474	1	1.01046
97	L	0	1555	1	1.01046
97	M	0	1566	1	1.01046
97	N	0	801	1	1.01046
97	P	384	25075	0.979779	0.989308
97	Q	7	1999	0.995303	1.00555
97	R	9	1946	0.993806	1.00398
97	S	17	5109	0.995536	1.00579
97	T	25	2930	0.988632	0.998569
97	V	16	1271	0.983318	0.99301
97	W	27	5522	0.993454	1.00361
97	Y	27	5819	0.993786	1.00396
98	*	22115	169	0.00563836	-0.029667
98	A	30	7312	0.994501	1.00471
98	C	190	4637	0.947668	0.95572
98	D	464	43967	0.985977	0.995792
98	E	326	21535	0.980006	0.989546
98	F	650	16019	0.94815	0.956224
98	G	151	9921	0.9799	0.989435
98	H	258	22995	0.985104	0.994879
98	I	25339	18947	0.356843	0.337701
98	K	104	13967	0.990065	1.00007
98	L	2246	35875	0.922191	0.92907
98	M	80	14962	0.992846	1.00298
98	N	21	4777	0.99411	1.0043
98	P	2175	24965	0.894924	0.900548
98	Q	0	6771	1	1.01046
98	R	203	25027	0.989187	0.999149
98	S	3584	2834	0.369774	0.351228
98	V	38	14862	0.996566	1.00687
98	W	13915	54886	0.745337	0.744076
98	Y	600	38196	0.979269	0.988775
99	*	21999	284	0.00948819	-0.02564
99	A	72	8721	0.988996	0.99895
99	C	0	886	1	1.01046
99	D	1160	39299	0.961742	0.970441
99	E	276	23914	0.984684	0.994439
99	F	1270	24942	0.935785	0.943289
99	G	28	9134	0.995886	1.00616
99	H	15	4617	0.995641	1.0059
99	I	10	6347	0.997881	1.00824
99	K	883	30931	0.962952	0.971707
99	L	2031	20412	0.88176	0.886778
99	M	403	26308	0.979773	0.989302
99	N	140	22513	0.991689	1.00177
99	Q	390	25785	0.980023	0.989564
99	R	2358	34321	0.915254	0.921814
99	S	108	8533	0.983229	0.992917
99	T	28	2372	0.98434	0.99408
99	V	1868	31231	0.925404	0.932431
99	W	236	18874	0.983428	0.993125
99	Y	385	26260	0.980624	0.990193
100	*	15559	1341	0.0601082	0.0273098
100	A	178	1005	0.8073	0.808892
100	C	1	1508	0.999107	1.00953
100	D	0	5183	1	1.01046
100	E	36	4085	0.988263	0.998183
100	F	0	1634	1	1.01046
100	G	0	969	1	1.01046
100	H	8	2693	0.996012	1.00629
100	I	12	1687	0.990505	1.00053
100	L	0	1452	1	1.01046
100	M	260	1697	0.828856	0.831439
100	N	0	2046	1	1.01046
100	P	0	2381	1	1.01046
100	Q	0	736	1	1.01046
100	R	0	1226	1	1.01046
100	S	9	2476	0.995125	1.00536
100	T	11	2127	0.993078	1.00322
100	V	115	1065	0.872962	0.877575
100	W	0	800	1	1.01046
100	Y	19	738	0.966467	0.975384
101	*	15776	816	0.0369612	0.00309744
101	A	10	2086	0.993581	1.00375
101	C	0	712	1	1.01046
101	D	14694	937	0.0451783	0.0116928
101	E	6379	13772	0.615675	0.608447
101	F	0	1564	1	1.01046
101	G	180	18171	0.986826	0.99668
101	H	128	2282	0.929719	0.936945
101	I	0	13770	1	1.01046
101	K	361	8000	0.942672	0.950493
101	L	3	7883	0.999487	1.00992
101	M	0	4223	1	1.01046
101	N	4	2456	0.99781	1.00817
101	P	17842	2276	0.086469	0.0548839
101	Q	38	5049	0.989959	0.999957
101	R	45	3616	0.983505	0.993206
101	S	0	4339	1	1.01046
101	T	244	5700	0.945456	0.953406
101	V	39	10696	0.99511	1.00535
101	W	11	1104	0.98675	0.9966
102	*	12701	964	0.0533154	0.0202044
102	A	21	1837	0.984827	0.994589
102	C	10	2138	0.993736	1.00391
102	D	0	3219	1	1.01046
102	E	15	2505	0.991995	1.00209
102	F	0	2860	1	1.01046
102	G	112	1366	0.900496	0.906377
102	H	0	1111	1	1.01046
102	I	4	4422	0.998782	1.00919
102	L	0	3117	1	1.01046
102	M	0	903	1	1.01046
102	N	215	1986	0.872678	0.877278
102	P	11630	235	0.0147718	-0.0201132
102	Q	343	1146	0.712572	0.709803
102	R	10	2162	0.993805	1.00398
102	S	5	1369	0.995102	1.00534
102	T	0	797	1	1.01046
102	V	0	2810	1	1.01046
102	W	0	7131	1	1.01046
102	Y	28	3831	0.990246	1.00026
103	*	22616	401	0.0129856	-0.0219816
103	A	0	2751	1	1.01046
103	C	47	1383	0.956206	0.96465
103	D	6475	58988	0.87113	0.875659
103	E	327	25233	0.982835	0.992505
103	G	93	14293	0.991307	1.00137
103	H	0	3358	1	1.01046
103	I	0	741	1	1.01046
103	K	211	4466	0.940139	0.947844
[truncated: 4,042 more rows]

## Sheet: Growth scores rep 1
Position	aa	Counts (0 hours)	Counts (16 hours)	functional score (unnormalized)	functional score (normalized)		selection coefficient
WT	WT	66275	2409	0.96	1		1
1	*	3850	9549	0.279543	0.038737		0.0481788
1	A	1704	17	0.98974	1.03761		1.29158
1	C	2062	137	0.93542	0.961209		0.864161
1	D	3167	252	0.923632	0.944629		0.823509
1	E	4434	1004	0.809528	0.784145		0.587763
1	F	1741	10	0.994067	1.04369		1.41603
1	G	2214	7	0.996725	1.04743		1.55061
1	H	3755	26	0.992856	1.04199		1.37391
1	I	3504	25	0.992641	1.04169		1.36715
1	K	2968	17	0.994083	1.04372		1.41666
1	L	830	5	0.993779	1.04329		1.40529
1	M	3211	36	0.988484	1.03584		1.26527
1	N	2546	20	0.991903	1.04065		1.34546
1	P	924	82	0.91557	0.933291		0.798911
1	Q	2279	10	0.995461	1.04566		1.47673
1	R	871	4	0.995251	1.04536		1.46646
1	T	2004	0	1	1.05204		nan
1	V	1168	0	1	1.05204		nan
1	W	2966	24	0.991662	1.04031		1.33878
1	Y	2357	7	0.996923	1.04771		1.56472
2	*	3675	11280	0.238696	-0.0187135		0.000138227
2	A	2809	1269	0.680536	0.60272		0.432063
2	C	1822	501	0.77777	0.739478		0.543981
2	D	1839	3310	0.348398	0.135578		0.120457
2	E	2688	3816	0.404014	0.2138		0.173954
2	F	1821	495	0.779752	0.742265		0.546573
2	H	2621	546	0.822054	0.801763		0.606559
2	I	2423	1005	0.698814	0.628428		0.451318
2	K	2262	1165	0.651392	0.561731		0.402516
2	L	2796	2133	0.557814	0.430116		0.313956
2	M	3061	1054	0.736486	0.681413		0.493276
2	N	1156	362	0.754492	0.706737		0.514674
2	P	280	283	0.487747	0.331569		0.250541
2	Q	2575	1767	0.583754	0.466599		0.337829
2	R	1854	668	0.727594	0.668906		0.483056
2	S	1802	994	0.635654	0.539596		0.38705
2	T	1792	767	0.69216	0.61907		0.444236
2	V	3268	1036	0.752212	0.703532		0.511909
2	W	2242	587	0.786127	0.751231		0.55503
2	Y	2028	1040	0.652368	0.563104		0.403486
3	*	1618	5013	0.236998	-0.0211014		-0.00197298
3	A	3845	10096	0.268209	0.0227951		0.0353293
3	C	2213	3380	0.386537	0.18922		0.157471
3	D	3424	10217	0.243864	-0.0114441		0.0065029
3	E	3060	8472	0.257938	0.00834911		0.0233851
3	G	4973	14389	0.249589	-0.0033927		0.0134465
3	H	3374	8383	0.279192	0.0382433		0.0477858
3	I	2002	325	0.855661	0.84903		0.662776
3	L	2398	273	0.894217	0.903257		0.742765
3	M	2746	330	0.888988	0.895903		0.730567
3	N	1592	4903	0.238083	-0.0195762		-0.000623259
3	P	4602	5210	0.459476	0.291806		0.224971
3	Q	2878	7471	0.270459	0.0259594		0.0379064
3	R	3192	8389	0.268031	0.0225445		0.0351246
3	S	2328	6412	0.258932	0.00974803		0.024555
3	T	1382	3518	0.274338	0.0314153		0.0423184
3	V	2954	1947	0.593513	0.480325		0.346914
3	W	2180	405	0.838191	0.824458		0.63237
3	Y	2292	2708	0.448892	0.27692		0.215346
4	*	2544	9319	0.208056	-0.0618072		-0.0397251
4	A	2337	1541	0.593408	0.480178		0.346817
4	C	2353	152	0.937098	0.963568		0.870499
4	D	3530	10162	0.250542	-0.00205192		0.0145924
4	E	2778	5908	0.311538	0.0837358		0.0828457
4	F	3491	4241	0.442018	0.267253		0.209074
4	G	3376	7283	0.308484	0.0794412		0.0796278
4	H	3734	1555	0.697968	0.627238		0.450413
4	I	1592	89	0.945098	0.974821		0.903082
4	K	1103	31	0.971624	1.01213		1.0581
4	L	3818	517	0.876649	0.878549		0.703659
4	M	2747	1126	0.701295	0.631918		0.453982
4	N	1365	922	0.587587	0.471991		0.34139
4	P	2560	768	0.76235	0.717791		0.524344
4	Q	1094	360	0.745191	0.693657		0.503497
4	S	2472	92	0.962767	0.999673		0.994803
4	T	3019	487	0.856443	0.850129		0.664205
4	V	2434	12	0.994903	1.04487		1.45047
4	W	2712	4338	0.375641	0.173895		0.147057
4	Y	2556	4941	0.332369	0.113035		0.104363
5	*	4446	12197	0.259696	0.0108222		0.0254514
5	A	3156	147	0.953835	0.987109		0.944226
5	C	4068	145	0.964285	1.00181		1.00454
5	D	3591	3337	0.508748	0.361105		0.26948
5	E	3479	2632	0.559871	0.433008		0.315836
5	F	1517	6	0.995907	1.04628		1.50014
5	G	3522	2237	0.602413	0.492843		0.35526
5	H	1687	46	0.972447	1.01329		1.06492
5	I	2522	89	0.964627	1.00229		1.00679
5	L	1785	34	0.980592	1.02474		1.14579
5	M	1096	26	0.975943	1.0182		1.09632
5	N	2359	428	0.841376	0.828939		0.637708
5	P	993	90	0.913927	0.93098		0.794161
5	Q	955	314	0.745348	0.693877		0.503683
5	R	3411	347	0.904398	0.917577		0.768129
5	S	2458	100	0.95944	0.994993		0.974726
5	T	608	89	0.867975	0.86635		0.686098
5	V	3731	371	0.90635	0.920323		0.773267
5	W	3601	33	0.990567	1.03877		1.31072
5	Y	1043	441	0.694756	0.62272		0.446988
6	*	1976	5940	0.242504	-0.0133573		0.00483681
6	A	2901	4286	0.394446	0.200343		0.164962
6	C	1698	1155	0.585887	0.469599		0.339809
6	D	4062	11132	0.259895	0.0111027		0.0256851
6	E	2241	6337	0.253914	0.00268953		0.0186216
6	F	689	232	0.740802	0.687483		0.498315
6	G	4014	8586	0.310302	0.0819976		0.0815453
6	H	2015	3543	0.353722	0.143067		0.125726
6	I	2607	112	0.957266	0.991935		0.962446
6	K	1308	3788	0.249421	-0.00362924		0.013244
6	L	3078	775	0.792623	0.760368		0.563838
6	N	2372	7578	0.231497	-0.0288392		-0.00888712
6	P	2788	7489	0.263768	0.0165495		0.030202
6	Q	2489	1214	0.663649	0.578969		0.414786
6	R	2991	7421	0.279474	0.0386399		0.0481015
6	S	2573	3597	0.407722	0.219015		0.177421
6	T	2576	2275	0.52146	0.378985		0.280953
6	V	2952	560	0.835337	0.820445		0.627661
6	W	3517	2394	0.585715	0.469357		0.33965
6	Y	4189	2736	0.595705	0.483408		0.348965
7	*	2117	5196	0.281658	0.0417108		0.0505399
7	C	1568	108	0.933209	0.958099		0.85604
7	D	3067	9858	0.230419	-0.030355		-0.0102549
7	E	1801	4817	0.264604	0.0177256		0.0311717
7	F	1874	5459	0.248327	-0.00516771		0.011925
7	G	3737	6502	0.356132	0.146457		0.128099
7	H	3511	10098	0.250715	-0.00180866		0.0148
7	I	3453	4945	0.401914	0.210847		0.171987
7	K	2078	6313	0.240568	-0.0160809		0.00245398
7	L	1760	5814	0.225601	-0.0371311		-0.016425
7	M	4224	14070	0.224153	-0.0391677		-0.0182977
7	N	3360	7052	0.314377	0.0877294		0.0858226
7	P	2154	3373	0.380638	0.180923		0.151847
7	Q	1665	5497	0.225702	-0.0369891		-0.0162948
7	R	3162	9121	0.250164	-0.00258441		0.0141376
7	S	1508	126	0.920114	0.939681		0.812496
7	T	2998	274	0.913268	0.930053		0.792279
7	V	1987	205	0.903175	0.915857		0.764958
7	W	4665	13273	0.252748	0.00105052		0.0172328
7	Y	2006	5124	0.273655	0.0304552		0.0415448
8	*	1246	4636	0.205498	-0.0654049		-0.0432408
8	A	3865	191	0.951158	0.983343		0.930884
8	C	2746	240	0.916743	0.93494		0.802353
8	D	5364	5809	0.470519	0.307337		0.234977
8	E	2233	3481	0.3817	0.182417		0.152862
8	G	2810	6412	0.29664	0.0627824		0.0669736
8	H	3724	159	0.957519	0.992291		0.963842
8	I	3017	4032	0.418639	0.23437		0.187571
8	K	601	1380	0.295336	0.0609485		0.0655632
8	L	2217	539	0.79832	0.768382		0.571732
8	M	2688	589	0.814537	0.791189		0.595161
8	N	1678	760	0.679979	0.601937		0.431485
8	P	1290	2969	0.294849	0.0602642		0.0650359
8	Q	1113	122	0.897746	0.908222		0.751303
8	R	2866	3934	0.412145	0.225237		0.181543
8	S	5721	1215	0.819215	0.797769		0.60221
8	T	1399	502	0.728406	0.670048		0.48398
8	V	4002	2887	0.571558	0.449447		0.32656
8	W	3373	216	0.937609	0.964288		0.872463
8	Y	2708	36	0.986374	1.03288		1.22686
9	*	1825	6989	0.200829	-0.0719722		-0.0497428
9	A	1667	2968	0.350868	0.139052		0.122906
9	C	1294	2007	0.382898	0.184101		0.154005
9	D	2577	6874	0.265128	0.018462		0.0317779
9	E	2121	5787	0.260747	0.0123002		0.026682
9	F	737	1908	0.270994	0.026712		0.0385173
9	G	2060	5748	0.256448	0.0062548		0.0216281
9	H	2390	8253	0.217951	-0.0478907		-0.0264176
9	I	3190	15947	0.161432	-0.127383		-0.109816
9	K	3212	10862	0.221535	-0.0428492		-0.0217048
9	L	1027	4979	0.165626	-0.121484		-0.102904
9	M	2098	8391	0.193951	-0.0816458		-0.0595301
9	N	2982	8369	0.255345	0.00470306		0.020322
9	Q	2229	7884	0.213888	-0.053605		-0.0318274
9	R	3483	9892	0.253091	0.00153199		0.0176412
9	S	1679	4699	0.255876	0.00544939		0.0209506
9	T	1030	3028	0.246622	-0.00756515		0.00986167
9	V	1873	4837	0.271482	0.0273986		0.0390741
9	W	3708	12201	0.226288	-0.0361644		-0.0155392
9	Y	3511	10767	0.238858	-0.0184852		0.000339553
10	*	3122	9561	0.239107	-0.0181357		0.000647591
10	A	2529	7495	0.245126	-0.00966934		0.00804283
10	C	3323	4555	0.41248	0.225708		0.181855
10	D	2344	6772	0.249871	-0.00299658		0.0137853
10	E	4557	14961	0.226681	-0.0356118		-0.0150336
10	F	2450	8935	0.208787	-0.0607793		-0.0387266
10	G	3287	8838	0.263579	0.0162834		0.0299824
10	H	1276	3567	0.256096	0.00575921		0.0212114
10	I	1773	5358	0.241535	-0.0147204		0.00364586
10	K	4106	12249	0.24391	-0.0113797		0.00655893
10	L	3090	9147	0.245341	-0.00936806		0.00830371
10	M	3085	10955	0.213223	-0.0545409		-0.0327206
10	N	3403	11032	0.228905	-0.0324848		-0.0121843
10	P	706	2723	0.199689	-0.0735752		-0.0513471
10	Q	2032	5250	0.271392	0.0272723		0.0389716
10	R	2606	9909	0.201976	-0.0703591		-0.0481354
10	T	1191	5	0.995657	1.04593		1.4867
10	V	2282	8328	0.208674	-0.060938		-0.0388806
10	W	2456	8588	0.21582	-0.0508883		-0.0292463
10	Y	3643	8897	0.282667	0.0431302		0.0516631
11	*	3574	10051	0.254956	0.00415603		0.0198606
11	A	4505	7375	0.37022	0.166271		0.141831
11	C	3289	9105	0.257959	0.00837914		0.0234102
11	D	4347	12816	0.246091	-0.00831327		0.00921586
11	E	1385	4577	0.225533	-0.0372266		-0.0165126
11	F	4454	12961	0.248523	-0.00489247		0.0121612
11	H	3266	8284	0.275055	0.0324244		0.0431301
11	I	4401	12775	0.248987	-0.0042396		0.0127212
11	K	1681	5357	0.231942	-0.0282131		-0.00832344
11	L	3181	9396	0.245742	-0.00880361		0.00879207
11	M	2640	7804	0.245599	-0.00900405		0.00861871
11	N	4723	14468	0.239056	-0.0182065		0.000585235
11	P	2982	8888	0.244074	-0.0111495		0.00675891
11	Q	4441	13072	0.24639	-0.00789155		0.00958002
11	R	3379	9889	0.24746	-0.00638778		0.0108761
11	S	2305	3016	0.423795	0.241622		0.192338
11	T	2289	7723	0.22193	-0.0422937		-0.0211888
11	V	3873	12095	0.235569	-0.0231112		-0.00375809
11	W	2592	7324	0.254057	0.00289111		0.0187921
11	Y	2359	6418	0.261298	0.0130755		0.0273261
12	*	3249	9083	0.256084	0.00574245		0.0211973
12	A	1777	1379	0.553594	0.424181		0.310103
12	C	3921	2829	0.571521	0.449394		0.326526
12	D	1875	4883	0.269824	0.0250671		0.037181
12	E	2923	5627	0.333293	0.114334		0.1053
12	F	2180	4312	0.327296	0.105899		0.0991885
12	G	2803	7070	0.276171	0.033994		0.0443902
12	H	1690	1462	0.526615	0.386235		0.285612
12	I	1881	2550	0.415165	0.229484		0.18435
12	L	4202	3125	0.564086	0.438937		0.319696
12	M	2136	1217	0.628125	0.529006		0.379753
12	N	2278	3549	0.381843	0.182618		0.152999
12	P	2094	2681	0.429111	0.249099		0.197238
12	Q	1927	768	0.707147	0.640148		0.460315
12	R	1462	195	0.878275	0.880836		0.707068
12	S	3903	2706	0.581251	0.463079		0.335509
12	T	2536	3650	0.400711	0.209155		0.170858
12	V	2771	2314	0.535407	0.398601		0.293571
12	W	3326	6307	0.336651	0.119057		0.108698
12	Y	2600	3066	0.449367	0.277589		0.21578
13	*	3655	8792	0.285751	0.0474679		0.0550806
13	A	3696	294	0.923654	0.94466		0.82358
13	C	2536	534	0.820477	0.799544		0.604137
13	D	2656	7718	0.248786	-0.00452243		0.0124787
13	E	4781	13944	0.248101	-0.00548505		0.0116524
13	F	3513	10109	0.250618	-0.00194584		0.0146829
13	G	2912	8370	0.250832	-0.0016441		0.0149404
13	H	4069	13208	0.228678	-0.0328031		-0.0124735
13	I	3498	526	0.864863	0.861972		0.680036
13	K	3159	8175	0.271072	0.0268226		0.038607
13	L	2693	7606	0.254141	0.0030098		0.0188925
13	M	2339	6705	0.251337	-0.000934325		0.0155453
13	N	3245	9361	0.250152	-0.00260078		0.0141237
13	P	1062	1718	0.372999	0.17018		0.144514
13	Q	3173	9038	0.252537	0.000754065		0.0169812
13	R	2177	6736	0.237238	-0.0207642		-0.00167424
13	S	2158	2172	0.488794	0.333041		0.251485
13	T	2779	726	0.786496	0.751751		0.555525
13	W	2348	7534	0.230724	-0.0299255		-0.00986688
13	Y	4197	12526	0.243829	-0.0114942		0.0064594
14	*	3216	8553	0.265708	0.0192782		0.0324488
14	A	2888	7469	0.271196	0.0269972		0.0387486
14	C	4990	13786	0.258346	0.00892389		0.0238662
14	D	3962	9496	0.286491	0.0485091		0.0558976
14	F	2971	6982	0.290532	0.0541923		0.060335
14	G	3510	10811	0.238066	-0.0195996		-0.00064398
14	H	4639	12918	0.256834	0.00679765		0.0220842
14	I	2599	6893	0.266248	0.0200372		0.0330719
14	K	3851	14845	0.199776	-0.0734529		-0.0512245
14	L	4136	12368	0.24347	-0.0119988		0.00602054
14	M	2060	6625	0.230319	-0.0304949		-0.0103813
14	N	3660	10732	0.247102	-0.00689135		0.0104425
14	P	2361	6629	0.255264	0.00458847		0.0202254
14	Q	2028	6015	0.244979	-0.00987596		0.00786383
14	R	2021	6684	0.225397	-0.0374183		-0.0166886
14	S	3733	10571	0.253645	0.0023116		0.0183017
14	T	2277	6158	0.262453	0.0147		0.0286731
14	V	4898	14061	0.251065	-0.00131741		0.0152189
14	W	5343	14408	0.263014	0.0154893		0.0293262
14	Y	1687	6710	0.194817	-0.0804282		-0.0582839
15	*	2458	7595	0.237487	-0.0204138		-0.00136398
15	A	2949	106	0.963995	1.0014		1.00264
15	C	2626	115	0.956475	0.990822		0.958124
15	D	2635	502	0.83475	0.819619		0.6267
15	E	3138	565	0.842394	0.83037		0.639431
15	F	2034	340	0.85201	0.843894		0.656179
15	H	2459	506	0.823844	0.804279		0.609328
15	I	1424	90	0.938373	0.965363		0.875424
15	K	606	49	0.922492	0.943026		0.819891
15	L	2344	148	0.93843	0.965443		0.875647
15	M	3343	211	0.938451	0.965472		0.875729
15	N	3160	92	0.970636	1.01074		1.05015
15	P	2909	302	0.902628	0.915088		0.763553
15	Q	2443	129	0.947985	0.978881		0.915945
15	R	1886	173	0.912979	0.929646		0.791456
15	S	1244	137	0.897315	0.907615		0.750246
15	T	2566	203	0.924039	0.945202		0.824813
15	V	2400	29	0.9876	1.0346		1.24839
15	W	3728	405	0.898565	0.909373		0.753319
15	Y	2114	382	0.841916	0.829697		0.63862
16	*	3511	11721	0.223767	-0.0397101		-0.0187978
16	A	2141	174	0.922127	0.942513		0.818744
16	D	2712	7314	0.262993	0.0154599		0.0293019
16	E	3934	10382	0.267218	0.0214024		0.0341906
16	F	2486	7681	0.237499	-0.0203966		-0.00134879
16	G	2760	339	0.886816	0.892848		0.725648
16	H	4125	10393	0.276392	0.0343044		0.044639
16	I	1810	5209	0.250598	-0.00197365		0.0146592
16	K	2457	7607	0.237128	-0.0209193		-0.00181159
16	L	2148	1545	0.572277	0.450458		0.327222
16	M	2612	7631	0.247784	-0.00593171		0.0112685
16	N	2676	2764	0.482327	0.323946		0.245649
16	P	883	2261	0.273169	0.0297721		0.0409937
16	Q	1308	1453	0.464188	0.298433		0.229244
16	R	3026	6907	0.296576	0.0626923		0.0669044
16	S	1845	401	0.815764	0.792916		0.596997
16	T	2787	234	0.919756	0.939178		0.811401
16	V	3283	701	0.818414	0.796643		0.600994
16	W	2625	7217	0.259278	0.0102349		0.0249615
16	Y	1429	4601	0.230115	-0.0307826		-0.0106416
17	*	2819	8631	0.239151	-0.0180742		0.000701769
17	A	3330	1295	0.712201	0.647257		0.465845
17	C	3971	874	0.813866	0.790246		0.594161
17	D	4328	11358	0.268316	0.0229467		0.035453
17	E	3967	6774	0.360442	0.152518		0.132324
17	F	3325	2234	0.588874	0.4738		0.342588
17	G	4666	6629	0.403834	0.213547		0.173786
17	H	1979	5615	0.253276	0.00179325		0.0178627
17	I	1991	132	0.935549	0.96139		0.864644
17	K	2665	6442	0.284754	0.046066		0.0539785
17	L	1532	293	0.834214	0.818865		0.625825
17	N	3705	5983	0.373413	0.170761		0.144913
17	P	1518	2220	0.396881	0.203768		0.167257
17	Q	3713	5617	0.388809	0.192415		0.159628
17	R	3289	9238	0.255193	0.00448871		0.0201413
17	S	3433	1749	0.653855	0.565194		0.404965
17	T	1363	239	0.845876	0.835267		0.645397
17	V	2264	104	0.954442	0.987963		0.947352
17	W	4808	12751	0.266258	0.0200513		0.0330834
17	Y	5164	6785	0.422781	0.240196		0.191402
18	*	2528	7370	0.248178	-0.00537738		0.0117449
18	A	1865	311	0.852313	0.844321		0.656723
18	C	1235	116	0.911078	0.926973		0.786117
18	D	4136	11990	0.249233	-0.00389377		0.0130175
18	E	4099	12750	0.236286	-0.0221035		-0.00286215
18	F	1078	2638	0.28226	0.0425581		0.0512107
18	G	3154	1881	0.617394	0.513914		0.369456
18	H	1789	4565	0.27386	0.0307434		0.0417772
18	I	1343	121	0.914394	0.931636		0.795502
18	K	4085	11086	0.261782	0.0137566		0.0278913
18	L	2259	102	0.955184	0.989007		0.951231
18	M	2312	597	0.788447	0.754494		0.558152
18	N	2452	4495	0.344247	0.12974		0.116324
18	P	2110	5841	0.257964	0.00838616		0.0234161
18	Q	5528	14787	0.264582	0.0176946		0.0311462
18	R	2931	9030	0.238019	-0.0196661		-0.000702727
18	S	1671	433	0.78786	0.75367		0.557361
18	T	2065	190	0.912735	0.929303		0.790767
18	W	4472	11630	0.2701	0.0254548		0.0374963
18	Y	4038	10113	0.277592	0.0359928		0.0459902
19	*	3233	10010	0.237119	-0.020931		-0.00182203
19	A	2874	177	0.939854	0.967445		0.881262
19	C	2573	185	0.930481	0.954263		0.846358
19	D	3531	769	0.815459	0.792487		0.59654
19	E	1500	142	0.910441	0.926076		0.784349
19	F	2823	141	0.95066	0.982644		0.928484
19	G	1905	226	0.890254	0.897684		0.733474
19	H	1790	96	0.947213	0.977796		0.91244
19	I	1336	73	0.946273	0.976473		0.908237
19	K	3213	56	0.982211	1.02702		1.16581
19	L	3054	342	0.895765	0.905435		0.746479
19	M	3176	53	0.982955	1.02807		1.17561
19	N	3340	240	0.930521	0.954319		0.846496
19	P	2373	769	0.748091	0.697735		0.506952
19	R	1675	117	0.932329	0.956862		0.852878
19	S	2393	170	0.931256	0.955352		0.84907
19	T	1804	302	0.851823	0.843632		0.655846
19	V	2134	56	0.973456	1.01471		1.07357
19	W	2458	109	0.95595	0.990085		0.9553
19	Y	3598	312	0.917342	0.935782		0.804127
20	*	1987	6185	0.236157	-0.0222844		-0.00302284
20	A	3406	544	0.857659	0.85184		0.666443
20	C	3262	709	0.815759	0.792909		0.59699
20	D	6889	17764	0.27178	0.0278175		0.0394134
20	E	3627	11762	0.228847	-0.0325655		-0.0122577
20	F	3721	5993	0.374031	0.17163		0.145507
20	G	2120	5753	0.261793	0.0137718		0.027904
20	H	924	3123	0.221628	-0.0427183		-0.0215832
20	I	2964	292	0.907138	0.921431		0.775366
20	K	2580	6279	0.283374	0.0441249		0.0524487
20	L	1997	1054	0.645814	0.553885		0.396999
20	M	702	337	0.667186	0.583945		0.418368
20	N	3335	9706	0.248499	-0.00492643		0.0121321
20	P	1819	4109	0.29875	0.0657505		0.069249
20	Q	2671	7772	0.248535	-0.00487469		0.0121765
20	R	3933	10829	0.258997	0.00983885		0.0246309
20	S	2416	2967	0.43935	0.263499		0.206633
20	T	3594	774	0.817139	0.79485		0.599066
20	W	1753	5098	0.248639	-0.00472891		0.0123016
20	Y	5435	17245	0.232718	-0.0271213		-0.00734228
21	*	3520	10503	0.243873	-0.0114328		0.00651272
21	A	2530	69	0.972442	1.01328		1.06488
21	C	2222	67	0.96962	1.00931		1.04225
21	D	3213	201	0.938963	0.966192		0.877733
21	E	2440	147	0.941086	0.969178		0.886223
21	F	2192	80	0.963462	1.00065		0.999209
21	G	2791	274	0.907431	0.921843		0.776152
21	H	3559	389	0.898009	0.908591		0.751948
21	I	3543	50	0.985548	1.03171		1.2134
21	K	1864	40	0.978188	1.02136		1.11892
21	L	2742	117	0.957544	0.992326		0.963982
21	M	1497	47	0.968407	1.0076		1.03314
21	N	2731	1905	0.579768	0.460994		0.334137
21	P	1286	2817	0.305233	0.0748688		0.0761823
21	Q	1624	42	0.97383	1.01523		1.07685
21	R	1318	67	0.949828	0.981473		0.924513
21	S	2136	76	0.964346	1.00189		1.00494
21	V	1657	34	0.979124	1.02268		1.12902
21	W	3434	60	0.982168	1.02696		1.16525
21	Y	3148	261	0.920681	0.940479		0.814242
22	*	2731	7852	0.250778	-0.00171986		0.0148757
22	A	1106	165	0.865785	0.863269		0.68182
22	D	1845	175	0.910282	0.925853		0.783911
22	E	2736	395	0.869552	0.868567		0.689216
22	F	2428	378	0.860754	0.856193		0.67221
22	G	1886	1491	0.549004	0.417725		0.30592
22	H	2226	554	0.794527	0.763046		0.566458
22	I	2197	69	0.968397	1.00759		1.03307
22	K	2691	795	0.765121	0.721687		0.527805
22	L	2589	178	0.933322	0.958259		0.85645
22	M	2479	129	0.948702	0.979889		0.919242
22	N	2721	416	0.862914	0.859231		0.6763
22	P	2500	7219	0.249967	-0.00286162		0.0139007
22	Q	1581	263	0.852619	0.844752		0.657272
22	R	2980	1416	0.669455	0.587136		0.420676
22	S	2327	142	0.940372	0.968173		0.883335
22	T	1087	113	0.90251	0.914921		0.763249
22	V	2083	14	0.993065	1.04228		1.38061
22	W	1765	727	0.700277	0.630485		0.452887
22	Y	2263	483	0.818477	0.796732		0.60109
23	*	2686	8202	0.239634	-0.0173947		0.00129986
23	A	1926	108	0.94494	0.974599		0.902397
23	C	973	41	0.958051	0.993039		0.966809
23	D	3330	193	0.943196	0.972146		0.894951
23	E	1723	122	0.931466	0.955648		0.849813
23	F	2835	221	0.925067	0.946648		0.828135
23	H	2359	93	0.960647	0.99669		0.981818
23	I	1674	75	0.955516	0.989473		0.952984
23	K	4100	123	0.969769	1.00952		1.0434
23	L	2284	129	0.944565	0.974071		0.900774
23	M	3637	289	0.923729	0.944766		0.823819
23	N	2682	163	0.940599	0.968493		0.88425
23	P	2732	1058	0.713059	0.648464		0.46679
23	Q	3217	170	0.947947	0.978828		0.915773
23	R	2656	173	0.936608	0.962879		0.868632
23	S	1688	152	0.914437	0.931697		0.795626
23	T	3535	302	0.918465	0.937363		0.807488
23	V	1741	60	0.965427	1.00341		1.01213
23	W	1602	186	0.892343	0.900622		0.738334
23	Y	2268	250	0.897231	0.907497		0.75004
24	*	2945	7685	0.269428	0.0245103		0.0367278
24	A	1052	74	0.931885	0.956238		0.851297
24	C	2263	62	0.972319	1.01311		1.06385
24	D	1876	84	0.955541	0.989509		0.953119
24	E	1816	97	0.947415	0.97808		0.913355
24	F	1301	28	0.978126	1.02127		1.11826
24	G	2569	71	0.972084	1.01278		1.06189
24	H	929	25	0.972798	1.01378		1.06789
24	I	828	60	0.929975	0.953551		0.844599
24	K	1553	43	0.972033	1.0127		1.06147
24	L	1329	54	0.959489	0.995062		0.975011
24	M	973	66	0.934157	0.959432		0.85949
24	N	846	12	0.985475	1.03161		1.21225
24	P	1562	124	0.923796	0.94486		0.824034
24	Q	2580	116	0.955366	0.989262		0.952189
24	R	2910	80	0.972227	1.01298		1.06308
24	S	1404	35	0.97475	1.01653		1.08514
24	V	1609	152	0.910611	0.926316		0.784821
24	W	1522	83	0.946373	0.976614		0.908679
24	Y	1542	59	0.961762	0.998258		0.988559
25	*	3388	9500	0.255514	0.00494063		0.0205222
25	A	3502	118	0.966172	1.00446		1.01721
25	C	1666	53	0.968001	1.00703		1.03017
25	D	2595	1748	0.588253	0.472928		0.34201
25	E	4374	1826	0.69745	0.62651		0.44986
25	F	3689	26	0.99273	1.04181		1.36991
25	G	5026	164	0.967205	1.00591		1.02445
25	H	3068	1471	0.66746	0.58433		0.418646
25	I	4319	403	0.911612	0.927724		0.787606
25	K	1322	2044	0.38364	0.185145		0.154713
25	L	5123	50	0.98996	1.03792		1.29652
25	M	2515	33	0.986549	1.03312		1.22981
25	N	2136	270	0.883901	0.888749		0.719174
25	P	592	302	0.653558	0.564777		0.404669
25	Q	4051	186	0.954462	0.987992		0.947459
25	R	372	278	0.562892	0.437258		0.318602
25	S	2766	130	0.953437	0.986549		0.942196
25	V	5218	423	0.922308	0.942768		0.819313
25	W	4686	153	0.967186	1.00589		1.02431
25	Y	3322	61	0.981277	1.02571		1.15405
26	*	5422	15417	0.252869	0.00122003		0.0173766
26	A	1726	86	0.950774	0.982804		0.929029
26	C	893	70	0.924682	0.946106		0.826886
26	D	3052	998	0.746387	0.695339		0.504919
26	E	3711	282	0.926816	0.949108		0.833887
26	F	2625	237	0.91423	0.931406		0.79503
26	G	2183	382	0.846144	0.835644		0.64586
26	H	2397	112	0.953696	0.986913		0.943515
26	I	1444	99	0.933497	0.958504		0.857083
26	K	2528	82	0.967394	1.00618		1.02579
26	L	3540	188	0.947702	0.978483		0.914653
26	M	337	14	0.958619	0.993837		0.970013
26	N	708	25	0.964607	1.00226		1.00665
26	P	2512	6214	0.280075	0.0394846		0.0487734
26	Q	3309	62	0.980902	1.02518		1.1495
26	R	374	15	0.959992	0.995769		0.977944
26	S	1741	80	0.954428	0.987944		0.947282
26	V	4126	166	0.959871	0.995599		0.977238
26	W	3499	271	0.925515	0.947278		0.829596
26	Y	2802	92	0.967008	1.00564		1.02305
29	*	2919	11316	0.198875	-0.0747203		-0.0524972
29	A	4659	1752	0.719035	0.656868		0.473415
29	C	2023	5085	0.276863	0.0349666		0.0451694
29	D	5038	13203	0.268588	0.0233284		0.0357645
29	E	2491	7383	0.245111	-0.00969111		0.00802397
29	F	4826	14299	0.245171	-0.00960674		0.00809705
29	H	3561	11442	0.230478	-0.0302717		-0.0101796
29	I	3847	8905	0.293658	0.0585887		0.0637428
29	K	2556	8363	0.227279	-0.0347706		-0.0142652
29	L	95	298	0.234768	-0.0242379		-0.00476209
29	M	672	1400	0.315975	0.0899762		0.0874909
29	N	3315	8944	0.262912	0.0153451		0.0292069
29	P	3302	9388	0.252888	0.00124716		0.0173997
29	Q	3475	9798	0.254463	0.00346262		0.0192752
29	R	1736	4273	0.281083	0.0409021		0.0498989
29	S	2797	4176	0.391939	0.196817		0.162593
29	T	3123	9049	0.249323	-0.00376647		0.0131265
29	V	4073	11513	0.253987	0.00279246		0.0187087
29	Y	2733	8251	0.241715	-0.014467		0.00386751
30	*	3447	10836	0.234381	-0.0247816		-0.00524743
30	A	3573	306	0.918281	0.937103		0.806932
30	C	1165	52	0.955675	0.989697		0.95383
30	D	7165	19952	0.256835	0.00679806		0.0220845
30	E	3222	8685	0.263092	0.0155986		0.0294166
30	F	1159	279	0.799911	0.770618		0.573965
30	G	999	3187	0.231752	-0.0284799		-0.00856357
30	H	2591	6447	0.278898	0.037829		0.0474557
30	I	2698	35	0.986699	1.03333		1.23238
30	K	2421	7519	0.236563	-0.0217136		-0.00251596
30	M	401	15	0.962585	0.999416		0.993657
30	N	2968	3419	0.455165	0.285743		0.221055
30	P	3310	4013	0.442516	0.267953		0.209529
30	Q	2102	3534	0.364032	0.157568		0.135828
30	R	4524	11887	0.268075	0.0226066		0.0351753
30	S	2381	526	0.813302	0.789453		0.593323
30	T	2872	558	0.832024	0.815785		0.622274
30	V	1507	41	0.972507	1.01337		1.06543
30	W	1105	3757	0.220606	-0.0441567		-0.0229217
30	Y	3786	10450	0.258524	0.00917342		0.0240748
31	*	763	2324	0.240096	-0.0167439		0.00187195
31	A	209	497	0.288102	0.0507744		0.0576707
31	C	1413	4142	0.247158	-0.00681203		0.0105109
31	E	651	1637	0.276783	0.0348547		0.0450798
31	F	513	18	0.964823	1.00256		1.00808
31	G	348	1059	0.240262	-0.0165105		0.0020769
31	H	1039	220	0.819657	0.79839		0.602884
31	I	330	1419	0.182876	-0.0972216		-0.0758595
31	K	562	1557	0.257811	0.00817075		0.0232357
31	L	392	648	0.367957	0.163087		0.13964
31	M	1464	2086	0.40313	0.212557		0.173127
31	N	911	3103	0.220295	-0.0445933		-0.0233289
31	P	915	2964	0.229041	-0.0322931		-0.0120103
31	Q	179	389	0.30692	0.0772414		0.0779727
31	R	940	2657	0.253991	0.00279883		0.0187141
31	S	1158	3563	0.238255	-0.0193343		-0.000409635
31	T	948	3008	0.232716	-0.0271247		-0.00734532
31	V	1579	3911	0.279818	0.0391229		0.0484858
31	Y	564	40	0.931363	0.955502		0.849447
32	*	459	1455	0.232888	-0.0268822		-0.00712774
32	A	335	39	0.892084	0.900258		0.737727
32	C	1102	21	0.980583	1.02473		1.14569
32	D	1090	3244	0.244347	-0.0107657		0.00709217
32	E	548	2208	0.192798	-0.0832674		-0.0611964
32	F	210	157	0.562791	0.437116		0.318509
32	G	3074	8085	0.267882	0.0223356		0.0349539
32	H	316	678	0.309647	0.0810769		0.0808554
32	I	341	11	0.967567	1.00642		1.02704
32	K	411	1367	0.224411	-0.0388051		-0.0179637
32	M	1849	141	0.926578	0.948773		0.833096
32	N	1328	3015	0.297697	0.064269		0.0681145
32	P	474	1164	0.281552	0.0415625		0.0504224
32	Q	129	253	0.32917	0.108535		0.101105
32	R	404	900	0.301673	0.0698614		0.0723853
32	S	966	2497	0.271298	0.0271405		0.0388648
32	W	765	2359	0.237854	-0.0198978		-0.000907531
32	Y	647	1479	0.296267	0.0622577		0.0665705
33	*	1123	3227	0.250882	-0.00157418		0.015
33	A	1065	19	0.981799	1.02644		1.16055
33	C	853	36	0.957988	0.99295		0.966455
33	E	1255	50	0.960247	0.996128		0.979445
33	F	645	9	0.985708	1.03194		1.21595
33	G	3000	54	0.981639	1.02622		1.15855
33	H	750	4	0.994489	1.04429		1.43275
33	K	1557	27	0.9823	1.02714		1.16695
33	L	854	15	0.982076	1.02683		1.16407
33	M	924	13	0.985591	1.03177		1.21409
33	N	888	21	0.976016	1.01831		1.09702
33	P	646	2054	0.232346	-0.0276439		-0.00781165
33	Q	752	41	0.946384	0.97663		0.90873
33	R	630	0	1	1.05204		nan
33	S	215	7	0.967276	1.00601		1.02495
33	T	1363	31	0.976912	1.01957		1.10581
33	V	1108	7	0.993478	1.04287		1.39457
33	W	955	17	0.981839	1.0265		1.16105
33	Y	1267	8	0.993482	1.04287		1.39469
34	*	799	2264	0.253526	0.00214513		0.0181608
34	A	892	15	0.982826	1.02788		1.17388
34	C	838	11	0.986544	1.03311		1.22972
34	E	703	5	0.992664	1.04172		1.36786
34	F	916	25	0.972422	1.01325		1.06472
34	G	1335	8	0.993812	1.04334		1.40648
34	H	1397	44	0.968309	1.00747		1.03243
34	I	1971	521	0.784516	0.748966		0.552876
34	K	1210	24	0.979806	1.02364		1.13667
34	L	1878	55	0.970467	1.0105		1.04882
34	M	928	13	0.985652	1.03186		1.21506
34	N	628	15	0.975782	1.01798		1.09478
34	P	1282	1000	0.552322	0.422391		0.308942
34	Q	1239	28	0.977056	1.01977		1.10726
34	R	1577	33	0.978719	1.02211		1.1246
34	S	1009	42	0.95854	0.993727		0.969567
34	T	1528	33	0.978051	1.02117		1.11748
34	V	2339	159	0.934024	0.959245		0.859004
34	W	1841	39	0.978461	1.02175		1.12183
34	Y	709	28	0.960581	0.996597		0.981425
35	*	1744	5378	0.237851	-0.0199024		-0.000911586
35	A	2757	67	0.97537	1.0174		1.09088
35	C	1995	38	0.980592	1.02474		1.14579
35	D	913	41	0.955417	0.989335		0.952462
35	E	191	16	0.919924	0.939415		0.811916
35	F	793	21	0.97322	1.01437		1.07151
35	G	1679	82	0.951702	0.98411		0.933542
35	H	1153	73	0.938272	0.96522		0.875029
35	I	210	5	0.975857	1.01808		1.09549
35	K	2338	76	0.967326	1.00608		1.02531
35	L	1523	57	0.962566	0.999389		0.993538
35	M	1413	59	0.958416	0.993552		0.968865
35	N	731	19	0.973702	1.01505		1.07572
35	P	54	88	0.371283	0.167766		0.142858
35	Q	814	43	0.947965	0.978853		0.915852
35	R	1470	97	0.935833	0.961789		0.865707
35	S	2933	96	0.967108	1.00578		1.02376
35	T	974	33	0.965991	1.00421		1.01597
35	W	850	31	0.963487	1.00068		0.999368
35	Y	912	17	0.980999	1.02531		1.15067
36	*	702	2173	0.237163	-0.0208691		-0.00176714
36	A	1967	453	0.806903	0.780452		0.583945
36	C	2553	203	0.923682	0.944699		0.823668
36	D	1189	2688	0.298584	0.0655172		0.0690705
36	E	1608	4831	0.242609	-0.0132094		0.0049658
36	F	1812	5652	0.235783	-0.0228111		-0.00349108
36	G	2489	7346	0.245893	-0.00859148		0.00897545
36	H	3127	8258	0.267083	0.021212		0.0340347
36	I	1830	127	0.932737	0.957436		0.85434
36	K	1558	3871	0.279192	0.0382425		0.0477851
36	L	1327	346	0.786822	0.752209		0.555962
36	M	606	735	0.442418	0.267815		0.209439
36	N	738	2035	0.258712	0.00943895		0.0242968
36	P	1255	3225	0.272463	0.0287788		0.0401912
36	Q	1119	4037	0.21058	-0.0582571		-0.0362872
36	R	2041	5461	0.26453	0.0176208		0.0310854
36	S	1720	3923	0.296734	0.0629157		0.0670761
36	T	1842	349	0.835507	0.820684		0.627939
36	W	1129	2560	0.297958	0.0646369		0.0683964
36	Y	1079	4133	0.200795	-0.0720199		-0.0497905
37	*	252	904	0.211524	-0.0569301		-0.0350099
37	A	1438	84	0.942774	0.971553		0.893182
37	C	152	2	0.986512	1.03307		1.22918
37	D	1594	1210	0.559039	0.431838		0.315075
37	E	1488	70	0.953395	0.986491		0.941986
37	F	1144	29	0.974335	1.01594		1.08136
37	G	829	446	0.641421	0.547707		0.392682
37	H	350	11	0.968375	1.00756		1.03291
37	I	678	4	0.993907	1.04347		1.41
37	K	1177	171	0.868835	0.867559		0.687794
37	L	1062	48	0.955141	0.988947		0.951006
37	M	933	52	0.945256	0.975044		0.90377
37	N	1110	144	0.88121	0.884964		0.713321
37	P	578	1621	0.255481	0.00489445		0.0204833
37	Q	495	75	0.863975	0.860723		0.678328
37	R	587	77	0.880045	0.883325		0.710823
37	S	683	20	0.970471	1.01051		1.04885
37	T	898	18	0.979596	1.02334		1.13429
37	V	542	17	0.968437	1.00765		1.03336
37	W	1629	21	0.986782	1.03345		1.2338
38	*	874	3822	0.180374	-0.100741		-0.0796542
38	A	889	24	0.972713	1.01366		1.06717
38	D	503	1009	0.32421	0.10156		0.0960218
38	E	1012	2442	0.28511	0.0465664		0.0543721
38	F	491	38	0.925566	0.94735		0.829764
38	G	436	174	0.706868	0.639757		0.460012
38	H	183	152	0.536744	0.400481		0.294782
38	I	1306	156	0.889584	0.896742		0.731933
38	K	712	1858	0.269425	0.0245057		0.0367241
38	L	623	40	0.937456	0.964073		0.871874
38	M	569	81	0.871139	0.870799		0.692386
38	N	417	266	0.601382	0.491393		0.35429
38	Q	870	854	0.49505	0.341839		0.257127
38	R	583	1402	0.285808	0.0475478		0.0551433
38	T	128	13	0.90454	0.917777		0.768499
38	V	948	77	0.922169	0.942571		0.818874
38	W	957	2789	0.248244	-0.00528441		0.0118248
38	Y	315	1468	0.171157	-0.113704		-0.0939989
39	*	1192	2449	0.318991	0.0942191		0.0906292
39	A	542	583	0.472207	0.309713		0.236505
39	C	827	54	0.936461	0.962673		0.868077
39	D	1929	5829	0.241549	-0.0147014		0.00366255
39	E	810	2156	0.265546	0.01905		0.0322613
39	F	1268	2964	0.291634	0.0557415		0.0615383
39	G	531	1163	0.305263	0.0749105		0.0762138
39	H	2671	6782	0.274844	0.0321274		0.0428914
39	I	1472	3189	0.307582	0.0781719		0.0786733
39	K	1317	3322	0.276163	0.0339826		0.0443811
39	L	3117	8730	0.255734	0.00525045		0.0207831
39	M	2138	5578	0.269468	0.0245662		0.0367734
39	N	564	751	0.419527	0.235619		0.188393
39	Q	637	1497	0.29053	0.0541888		0.0603323
39	R	2499	7608	0.240183	-0.0166214		0.00197957
39	S	1915	2591	0.415642	0.230155		0.184792
39	T	1059	2504	0.289271	0.0524181		0.0589537
39	V	1507	2408	0.375888	0.174242		0.147294
39	W	1354	3881	0.251356	-0.000907767		0.0155679
39	Y	1953	5068	0.270528	0.0260576		0.0379861
40	*	2258	7063	0.235276	-0.0235233		-0.00412501
40	A	1804	6471	0.211536	-0.0569123		-0.0349928
40	C	4945	14096	0.252395	0.000554003		0.0168113
40	D	3741	11165	0.24383	-0.0114927		0.00646065
40	E	3051	8691	0.252526	0.000738613		0.0169681
40	F	2267	7800	0.218568	-0.0470227		-0.0256022
40	G	4915	15283	0.236347	-0.0220175		-0.00278576
40	H	3827	10384	0.261816	0.0138046		0.0279311
40	I	2140	7320	0.219571	-0.0456122		-0.0242808
40	K	2580	7946	0.238078	-0.019582		-0.000628463
40	L	3736	10319	0.258393	0.00899028		0.0239217
40	M	1990	5735	0.250337	-0.00234121		0.0143454
40	N	2868	8064	0.254993	0.0042073		0.0199039
40	P	1646	4609	0.255778	0.00531244		0.0208353
40	Q	2241	6657	0.244695	-0.0102766		0.00751657
40	S	3187	9723	0.2398	-0.0171613		0.00150517
40	T	2102	6199	0.246037	-0.00838901		0.00915043
40	V	4007	14273	0.212706	-0.0552675		-0.0334154
40	W	3538	11562	0.227492	-0.0344713		-0.0139921
40	Y	1488	4580	0.23819	-0.0194256		-0.000490235
41	*	1829	4619	0.275924	0.0336458		0.044111
41	A	2694	7378	0.260025	0.0112847		0.0258368
41	C	3297	9361	0.253146	0.00160995		0.0177073
41	D	4083	12523	0.238831	-0.0185236		0.000305754
41	E	3664	11944	0.22793	-0.0338557		-0.0134311
41	F	3409	9455	0.257598	0.007872		0.0229854
41	G	3130	8470	0.262336	0.0145355		0.0285369
41	I	2682	9927	0.206351	-0.0642049		-0.0420645
41	K	1660	4266	0.272451	0.0287616		0.0401773
41	L	2800	8711	0.236253	-0.022149		-0.00290249
41	M	3009	9918	0.225988	-0.0365874		-0.0159265
41	N	3230	8621	0.265011	0.018298		0.0316429
41	P	3418	8606	0.276524	0.0344907		0.0447883
41	Q	2017	5771	0.251694	-0.000432336		0.0159727
41	R	2331	6859	0.246451	-0.00780571		0.00965411
41	S	3421	10933	0.231437	-0.0289235		-0.00896309
41	T	2300	6177	0.263804	0.0166007		0.0302442
41	V	2080	5760	0.257896	0.00829045		0.023336
41	W	3753	14142	0.203436	-0.0683058		-0.0460991
41	Y	2950	9017	0.239455	-0.0176462		0.00107859
42	*	1951	5903	0.241315	-0.0150297		0.00337516
42	A	2182	529	0.798773	0.769018		0.572367
42	C	3852	1046	0.779929	0.742515		0.546806
42	D	4145	13133	0.232975	-0.0267602		-0.00701827
42	E	2357	7028	0.243999	-0.0112545		0.00666768
42	F	3239	6139	0.336761	0.119212		0.108809
42	G	3131	1883	0.615413	0.511127		0.367567
42	H	3331	10612	0.231996	-0.0281373		-0.00825527
42	I	1590	446	0.774309	0.734611		0.539492
42	K	2433	6170	0.275092	0.0324766		0.0431721
42	L	2417	666	0.777409	0.73897		0.543509
42	M	3317	3962	0.446196	0.273128		0.212888
42	N	3763	8636	0.295444	0.061101		0.0656806
42	P	4433	13834	0.235697	-0.0229314		-0.00359805
42	Q	3250	10011	0.238051	-0.0196204		-0.000662329
42	R	3099	7302	0.28999	0.0534297		0.0597417
42	S	2478	1081	0.688089	0.613344		0.439945
42	T	4223	2172	0.651703	0.562168		0.402825
42	W	3809	9496	0.278509	0.0372825		0.04702
42	Y	1837	6539	0.212819	-0.0551082		-0.0332629
43	*	3219	10014	0.236263	-0.0221353		-0.00289036
43	A	2625	337	0.8823	0.886496		0.715677
43	C	2062	155	0.927549	0.950139		0.836334
43	D	3047	8515	0.256158	0.00584574		0.0212841
43	E	4246	7484	0.353165	0.142284		0.125177
43	F	4070	415	0.904197	0.917295		0.767606
43	G	2524	958	0.717154	0.654223		0.47132
43	H	603	1260	0.315331	0.0890706		0.086819
43	K	2962	3381	0.457435	0.288936		0.223118
43	L	5643	314	0.94534	0.975161		0.904135
43	M	2027	106	0.948461	0.979551		0.918132
43	N	3341	3355	0.489365	0.333844		0.252
43	P	1950	5384	0.258464	0.00908977		0.0240049
43	Q	2727	1644	0.614841	0.510322		0.367022
43	R	4035	5644	0.407587	0.218826		0.177295
43	S	2844	718	0.792183	0.759749		0.563235
43	T	2333	226	0.908546	0.923411		0.77916
43	V	3124	109	0.965013	1.00283		1.00935
43	W	3717	5140	0.410354	0.222718		0.179876
43	Y	1834	1049	0.627217	0.52773		0.378877
44	*	3183	10203	0.230903	-0.0296747		-0.00964043
44	A	2000	194	0.908435	0.923256		0.77886
44	D	3273	3118	0.502538	0.352371		0.263879
44	E	3837	5371	0.407409	0.218575		0.177129
44	F	2755	2776	0.488513	0.332645		0.251231
44	G	2244	432	0.833304	0.817585		0.624345
44	H	3009	3189	0.475903	0.31491		0.239846
44	I	2388	179	0.927739	0.950405		0.83697
44	K	4348	6819	0.38028	0.180419		0.151504
44	L	2578	91	0.964619	1.00228		1.00673
44	M	3266	813	0.794493	0.762999		0.566411
44	N	889	435	0.662932	0.577961		0.414063
44	P	3926	5013	0.429773	0.25003		0.197847
44	Q	1736	1564	0.516487	0.371991		0.276463
44	R	1578	3113	0.327879	0.10672		0.0997855
44	S	1123	291	0.78786	0.753669		0.55736
44	T	1443	351	0.79824	0.768268		0.571619
44	V	1909	182	0.909863	0.925264		0.782757
44	W	3262	2945	0.515961	0.371251		0.275988
44	Y	2923	3581	0.439942	0.264333		0.207175
45	*	4680	12296	0.268089	0.0226267		0.0351917
45	A	3250	76	0.976277	1.01867		1.09955
45	C	2550	78	0.969195	1.00871		1.03902
45	D	2576	55	0.978296	1.02151		1.12006
45	E	2746	124	0.95518	0.989002		0.951212
45	F	2129	112	0.948169	0.97914		0.916788
45	G	1935	86	0.955856	0.989952		0.954795
45	H	1958	68	0.965169	1.00305		1.0104
45	I	3774	188	0.950785	0.982819		0.929082
45	K	1786	45	0.974487	1.01616		1.08273
45	L	2910	50	0.982459	1.02737		1.16903
45	M	1669	38	0.976888	1.01953		1.10557
45	N	3001	86	0.971083	1.01137		1.05372
45	P	3805	602	0.858811	0.85346		0.668578
45	Q	3876	73	0.980805	1.02504		1.14834
45	R	2839	60	0.978511	1.02182		1.12236
45	S	2059	60	0.97061	1.0107		1.04995
45	V	2729	98	0.964027	1.00144		1.00286
45	W	4204	446	0.900707	0.912386		0.758669
45	Y	1963	164	0.920121	0.939692		0.81252
46	*	2802	7595	0.262015	0.0140841		0.0281629
46	C	1947	39	0.97961	1.02336		1.13445
46	D	1292	187	0.869265	0.868163		0.688646
46	E	1541	67	0.956774	0.991243		0.95975
46	F	1807	97	0.947167	0.977731		0.912235
46	G	1619	90	0.94539	0.975232		0.904355
46	H	2456	91	0.962926	0.999896		0.995802
46	I	885	23	0.973705	1.01506		1.07575
46	K	2058	86	0.958385	0.993508		0.968687
46	L	1587	22	0.9858	1.03207		1.21742
46	M	2339	74	0.968172	1.00727		1.03142
46	N	2079	148	0.931123	0.955165		0.848603
46	P	1061	30	0.971458	1.0119		1.05674
46	Q	1742	53	0.969354	1.00894		1.04023
46	R	1603	43	0.972882	1.0139		1.06861
46	T	884	41	0.954022	0.987372		0.945185
46	V	2036	76	0.96266	0.999522		0.99413
46	W	1729	66	0.961848	0.998379		0.989088
46	Y	1611	103	0.937703	0.96442		0.872824
47	*	1356	4150	0.239225	-0.0179695		0.00079397
47	A	903	54	0.941496	0.969755		0.887895
47	C	2027	113	0.945244	0.975027		0.903717
47	D	519	15	0.970844	1.01103		1.0518
47	F	2425	74	0.969266	1.00881		1.03955
47	G	1539	70	0.95487	0.988565		0.949583
47	H	1648	79	0.952552	0.985304		0.937743
47	I	867	30	0.965293	1.00322		1.01122
47	K	3091	97	0.968421	1.00762		1.03325
47	L	1866	60	0.967668	1.00657		1.02776
47	M	2142	86	0.959951	0.995712		0.977705
47	N	779	30	0.961523	0.997922		0.987098
47	P	2546	201	0.924185	0.945407		0.825281
47	Q	2127	76	0.964201	1.00169		1.00399
47	R	1613	98	0.940617	0.968518		0.884321
47	S	2966	113	0.961919	0.998479		0.989525
47	T	1893	114	0.941108	0.969209		0.886313
47	V	2197	71	0.96751	1.00634		1.02663
47	W	614	56	0.913432	0.930283		0.792746
47	Y	458	16	0.964971	1.00277		1.00907
48	*	851	2542	0.243671	-0.0117166		0.00626603
48	A	1105	137	0.885872	0.891521		0.723537
48	C	424	46	0.898688	0.909546		0.753624
48	F	1548	320	0.823179	0.803344		0.608296
48	G	811	126	0.861	0.856539		0.672674
48	H	602	41	0.933907	0.959082		0.858579
48	I	1294	488	0.718456	0.656054		0.472769
48	K	367	90	0.796925	0.76642		0.569784
48	L	927	104	0.895594	0.905194		0.746066
48	M	1063	211	0.82901	0.811546		0.617447
48	N	1618	56	0.965284	1.00321		1.01117
48	P	824	379	0.676617	0.597209		0.428013
48	Q	1167	38	0.967272	1.00601		1.02492
48	R	695	147	0.819818	0.798617		0.60313
48	S	901	56	0.939334	0.966714		0.879197
48	T	440	48	0.898184	0.908838		0.75238
48	V	1218	148	0.887892	0.894362		0.728075
48	W	200	152	0.558746	0.431426		0.314807
48	Y	1160	185	0.857839	0.852093		0.666775
49	*	2705	7958	0.246486	-0.00775647		0.0096966
49	A	2493	315	0.883942	0.888807		0.719265
49	C	2406	99	0.958997	0.994369		0.972172
49	D	2981	1552	0.648932	0.558271		0.400079
49	E	2232	844	0.717914	0.655292		0.472165
49	F	1398	201	0.870019	0.869224		0.690146
49	G	1961	1277	0.596422	0.484416		0.349635
49	H	2421	522	0.816963	0.794602		0.5988
49	I	3567	601	0.851007	0.842484		0.654392
49	K	1387	187	0.877119	0.87921		0.70464
49	L	1766	10	0.99415	1.04381		1.41925
49	N	2157	408	0.835737	0.821007		0.628316
49	P	1072	689	0.59957	0.488845		0.352588
49	Q	2287	357	0.860434	0.855742		0.671609
49	R	2811	453	0.856564	0.8503		0.664428
49	S	1647	419	0.790919	0.757972		0.561508
49	T	2118	117	0.945715	0.975688		0.905775
49	V	3168	100	0.968242	1.00737		1.03193
49	W	3289	2252	0.584288	0.46735		0.338325
49	Y	2543	705	0.776353	0.737485		0.542136
50	*	2495	9032	0.210013	-0.0590556		-0.0370578
50	A	1446	23	0.983741	1.02917		1.18643
50	C	2215	22	0.989785	1.03767		1.29258
50	D	3334	54	0.983448	1.02876		1.18234
50	E	2226	42	0.980771	1.02499		1.14793
50	F	2031	12	0.993898	1.04346		1.40966
50	G	2680	33	0.987367	1.03427		1.24413
50	H	2061	26	0.987061	1.03384		1.23868
50	I	3010	120	0.960222	0.996092		0.979296
50	K	2709	12	0.995418	1.0456		1.4746
50	M	2143	23	0.988971	1.03653		1.27511
50	N	2016	14	0.992836	1.04196		1.37324
50	P	2306	14	0.993731	1.04322		1.40354
50	Q	1541	19	0.98735	1.03425		1.24384
50	R	3150	33	0.989231	1.03689		1.28056
50	S	2447	34	0.985768	1.03202		1.2169
50	T	3503	94	0.972873	1.01389		1.06853
50	V	2778	50	0.981641	1.02622		1.15856
50	W	2168	46	0.978428	1.0217		1.12147
50	Y	3335	64	0.980449	1.02454		1.14411
51	*	5035	13921	0.258199	0.00871716		0.0236932
51	A	893	42	0.953405	0.986505		0.942037
51	C	2198	117	0.947587	0.978322		0.914132
51	D	3107	169	0.946503	0.976797		0.90926
51	E	2702	114	0.958	0.992968		0.966525
51	F	3674	228	0.939422	0.966837		0.879544
51	G	2908	301	0.902889	0.915455		0.764223
51	H	1921	87	0.955055	0.988825		0.950552
51	I	2043	266	0.88083	0.884429		0.712504
51	K	3820	163	0.957544	0.992325		0.963979
51	L	3729	364	0.90791	0.922517		0.77744
51	M	1854	110	0.941929	0.970363		0.889672
51	P	4734	6267	0.420946	0.237615		0.189706
51	Q	3201	200	0.939034	0.966292		0.878013
51	R	2526	120	0.952958	0.985876		0.939779
51	S	2965	161	0.94659	0.976919		0.909646
51	T	4501	390	0.917401	0.935865		0.804302
51	V	3288	437	0.878653	0.881368		0.707866
51	W	3218	115	0.964195	1.00168		1.00395
51	Y	3288	268	0.921917	0.942217		0.818085
52	*	2395	6902	0.250341	-0.00233458		0.0143511
52	A	2822	992	0.732455	0.675743		0.488616
52	C	1871	598	0.750686	0.701385		0.510067
52	D	4230	1211	0.770722	0.729565		0.53489
52	E	3844	1323	0.736576	0.68154		0.49338
52	F	2891	1195	0.699537	0.629445		0.452093
52	G	3384	579	0.849047	0.839727		0.650927
52	H	2812	1115	0.708204	0.641635		0.461467
52	I	2463	1010	0.70121	0.631798		0.45389
52	K	1964	1431	0.569116	0.446012		0.324314
52	L	2681	824	0.757938	0.711585		0.518889
52	M	2019	586	0.768289	0.726143		0.531797
52	N	4855	2513	0.650257	0.560134		0.40139
52	Q	2816	712	0.791935	0.759401		0.562896
52	R	2385	1611	0.587582	0.471984		0.341386
52	S	1444	392	0.779979	0.742585		0.546872
52	T	3594	961	0.782566	0.746223		0.550284
52	V	2175	1032	0.669775	0.587585		0.421001
52	W	4091	1278	0.754939	0.707366		0.515219
52	Y	2877	1223	0.693615	0.621117		0.445778
53	*	1425	4613	0.229158	-0.0321281		-0.0118606
53	A	1042	40	0.961641	0.998088		0.98782
53	C	1964	98	0.950706	0.982709		0.928704
53	D	2496	68	0.97247	1.01332		1.06512
53	E	1259	52	0.958848	0.99416		0.971322
53	F	3404	260	0.926468	0.948618		0.832732
53	G	3329	496	0.865935	0.86348		0.682111
53	H	2846	236	0.920669	0.940462		0.814205
53	I	2507	129	0.949245	0.980654		0.921774
53	K	1841	51	0.97202	1.01269		1.06136
53	L	2879	128	0.955841	0.989931		0.954717
53	M	1041	41	0.960683	0.996742		0.982037
53	P	2136	124	0.943109	0.972023		0.894584
53	Q	1935	65	0.966272	1.0046		1.0179
53	R	1970	68	0.965374	1.00334		1.01177
53	S	2502	107	0.957452	0.992197		0.963474
53	T	2476	159	0.937446	0.964059		0.871836
53	V	1596	109	0.933736	0.95884		0.857953
53	W	2910	201	0.933033	0.957852		0.855404
53	Y	1575	96	0.940436	0.968264		0.883595
54	*	2647	8630	0.227904	-0.0338914		-0.0134636
54	A	3583	6650	0.341463	0.125825		0.113539
54	C	4384	8190	0.339995	0.12376		0.112066
54	D	3314	7451	0.299736	0.0671368		0.0703086
54	E	4548	8845	0.33103	0.111152		0.103001
54	F	2741	533	0.831905	0.815618		0.622083
54	G	2237	5105	0.296619	0.0627536		0.0669515
54	H	3285	2427	0.565704	0.441213		0.32118
54	I	3303	5652	0.359959	0.151839		0.131852
54	K	2060	4018	0.330385	0.110245		0.102344
54	L	4039	6698	0.367217	0.162046		0.138922
54	M	3198	2585	0.543499	0.409982		0.300913
54	N	2967	7099	0.286843	0.0490036		0.0562851
54	P	2917	4483	0.385066	0.187151		0.156071
54	Q	4452	8925	0.324347	0.101751		0.096162
54	R	4562	9892	0.307394	0.0779084		0.078475
54	S	2140	3363	0.379801	0.179746		0.151046
54	T	3584	6578	0.343978	0.129362		0.116056
54	V	3882	6920	0.350594	0.138667		0.122635
54	W	3658	864	0.802934	0.774871		0.578248
55	*	3920	11257	0.251004	-0.00140215		0.0151467
55	A	3887	148	0.961941	0.99851		0.98966
55	C	3052	125	0.959179	0.994625		0.973217
55	D	3835	179	0.953743	0.986979		0.943755
55	F	3168	64	0.979439	1.02312		1.13253
55	G	2274	118	0.948838	0.980081		0.919876
55	H	2911	102	0.964869	1.00263		1.00839
55	I	2770	90	0.967341	1.00611		1.02541
55	K	1615	32	0.979826	1.02367		1.1369
55	L	3248	98	0.969601	1.00928		1.0421
55	M	2280	57	0.97468	1.01643		1.08449
55	N	2466	85	0.965422	1.00341		1.01209
55	P	2158	63	0.970558	1.01063		1.04954
55	Q	4085	180	0.956218	0.99046		0.956735
55	R	3454	103	0.969945	1.00977		1.04475
55	S	2972	89	0.969822	1.00959		1.0438
55	T	2179	84	0.961485	0.997869		0.98687
55	V	4485	154	0.96555	1.00359		1.01296
55	W	1746	31	0.981885	1.02656		1.16164
55	Y	3440	110	0.967841	1.00681		1.02901
56	*	3524	11372	0.229715	-0.031345		-0.0111507
56	A	3107	75	0.975531	1.01762		1.09239
56	C	2909	111	0.961862	0.9984		0.989176
56	E	2916	78	0.972957	1.014		1.06925
56	F	1665	47	0.971504	1.01196		1.05712
56	G	2907	60	0.979003	1.02251		1.1277
56	H	3538	124	0.964861	1.00262		1.00834
56	I	2647	40	0.98454	1.0303		1.19798
56	K	2759	33	0.987724	1.03477		1.25068
56	L	3405	126	0.962972	0.99996		0.996093
56	M	2087	33	0.983835	1.0293		1.18776
56	N	2120	65	0.969124	1.00861		1.03849
56	P	3414	439	0.882132	0.886261		0.715313
56	Q	2940	103	0.964875	1.00264		1.00843
56	R	2381	143	0.941258	0.96942		0.886924
56	S	2888	204	0.931619	0.955864		0.850354
56	T	770	14	0.981457	1.02596		1.15628
56	V	3175	1219	0.71482	0.650941		0.468733
56	W	2130	22	0.989381	1.0371		1.28376
56	Y	4245	87	0.979148	1.02271		1.12929
57	*	3804	11799	0.236796	-0.0213856		-0.00222498
57	A	4998	692	0.874225	0.87514		0.698647
57	C	3178	332	0.902076	0.914312		0.762141
57	D	4600	897	0.831513	0.815067		0.621451
57	E	2028	214	0.901185	0.913059		0.759877
57	F	3548	927	0.786477	0.751725		0.5555
57	G	3344	913	0.778996	0.741202		0.545582
57	H	1983	605	0.759287	0.713482		0.520549
57	I	2954	141	0.952745	0.985576		0.938709
57	K	2333	516	0.813124	0.789203		0.593059
57	M	3717	230	0.939587	0.967069		0.880198
57	N	2052	259	0.884052	0.888962		0.719507
57	P	1554	2143	0.411023	0.223658		0.180498
57	Q	3565	352	0.906948	0.921163		0.774858
57	R	4690	1681	0.728629	0.670363		0.484235
57	S	1707	210	0.886655	0.892622		0.725287
57	T	3495	386	0.897052	0.907245		0.749602
57	V	1987	255	0.882337	0.886549		0.715759
57	W	5843	2890	0.660523	0.574572		0.411637
57	Y	3316	696	0.820951	0.80021		0.604863
58	*	3368	10517	0.235585	-0.0230887		-0.00373807
58	A	3771	254	0.934588	0.960039		0.861075
58	C	2949	252	0.918447	0.937337		0.807432
58	D	4111	1169	0.771915	0.731242		0.536414
58	E	1731	230	0.878682	0.881409		0.707927
58	F	2116	63	0.969991	1.00983		1.04511
58	G	5182	1581	0.759286	0.713481		0.520548
58	H	1647	48	0.970606	1.0107		1.04992
58	I	2025	87	0.957265	0.991933		0.962437
58	K	3134	578	0.839178	0.825847		0.634016
58	M	3619	289	0.923379	0.944273		0.822701
58	N	1928	220	0.893998	0.90295		0.742245
58	P	3334	3244	0.49725	0.344935		0.259112
58	Q	2245	157	0.932255	0.956757		0.852612
58	R	1700	300	0.845043	0.834095		0.643959
58	S	1842	150	0.921984	0.942311		0.818293
58	T	2942	479	0.855299	0.84852		0.662115
58	V	2189	106	0.952093	0.984659		0.935464
58	W	4822	102	0.978492	1.02179		1.12216
58	Y	2928	136	0.953958	0.987282		0.944855
59	*	2596	7426	0.251735	-0.000374436		0.016022
59	A	1206	35	0.970726	1.01087		1.05087
59	C	5089	165	0.967407	1.0062		1.02589
59	D	1785	85	0.952852	0.985726		0.939243
59	E	4055	212	0.948473	0.979568		0.918188
59	F	811	26	0.967761	1.0067		1.02843
59	G	5171	196	0.962106	0.998743		0.99068
59	H	1111	45	0.959612	0.995234		0.975723
59	K	2316	102	0.956239	0.99049		0.956848
59	L	5144	223	0.956895	0.991413		0.960408
59	M	3197	197	0.939823	0.967402		0.881139
59	N	3248	114	0.964812	1.00255		1.00801
59	P	1209	235	0.831962	0.815698		0.622175
59	Q	1403	38	0.972626	1.01354		1.06644
59	R	2386	94	0.960673	0.996726		0.981973
59	S	1944	61	0.968424	1.00763		1.03327
59	T	2897	106	0.963372	1.00052		0.998634
59	V	4714	181	0.961633	0.998077		0.98777
59	W	3816	89	0.976338	1.01876		1.10015
59	Y	3299	98	0.970057	1.00992		1.04562
60	*	1664	6701	0.192881	-0.0831504		-0.0610758
60	A	3117	77	0.974973	1.01684		1.08719
60	C	948	34	0.964071	1.00151		1.00314
60	D	3331	139	0.958441	0.993587		0.969005
60	E	2253	79	0.964845	1.00259		1.00823
60	F	4074	122	0.969822	1.00959		1.0438
60	G	1765	46	0.973632	1.01495		1.07511
60	H	2029	71	0.964915	1.00269		1.00869
60	I	1883	64	0.965887	1.00406		1.01526
60	K	1605	31	0.980325	1.02437		1.14266
60	L	3065	147	0.952529	0.985273		0.93763
60	M	4227	147	0.965124	1.00299		1.01009
60	N	2794	162	0.943175	0.972116		0.89486
60	P	4951	185	0.962624	0.99947		0.9939
60	Q	1860	34	0.98136	1.02582		1.15507
60	S	4470	136	0.969354	1.00894		1.04022
60	T	2290	85	0.962863	0.999807		0.995403
60	V	3022	112	0.962917	0.999883		0.995745
60	W	2994	89	0.970037	1.0099		1.04546
60	Y	1977	66	0.966473	1.00489		1.0193
61	*	3284	8971	0.260514	0.0119727		0.0264095
61	A	3945	359	0.913609	0.930532		0.793251
61	C	4258	178	0.95837	0.993487		0.968603
61	D	3662	1375	0.71934	0.657298		0.473756
61	E	1709	211	0.886295	0.892116		0.72448
61	F	2261	222	0.907419	0.921826		0.77612
61	G	3450	497	0.869798	0.868913		0.689705
61	H	2964	341	0.893219	0.901854		0.740396
61	I	2654	130	0.951567	0.983919		0.932878
61	L	5501	159	0.970841	1.01103		1.05179
61	M	2904	155	0.947452	0.978132		0.913521
61	N	3663	256	0.932295	0.956814		0.852757
61	P	5269	1723	0.746382	0.695332		0.504913
61	Q	4125	110	0.973038	1.01412		1.06995
61	R	1940	92	0.953037	0.985987		0.940174
61	S	3001	233	0.925346	0.94704		0.829043
61	T	2425	126	0.948775	0.979992		0.919582
61	V	3040	123	0.959653	0.995293		0.975965
61	W	2344	156	0.935317	0.961065		0.86378
61	Y	2451	115	0.953512	0.986655		0.942578
62	*	3925	10327	0.26781	0.0222351		0.0348717
62	A	2687	124	0.954241	0.987681		0.946316
62	C	3392	45	0.986402	1.03291		1.22733
62	D	1234	31	0.97456	1.01626		1.0834
62	E	2188	50	0.976805	1.01942		1.10475
62	F	2118	70	0.966798	1.00534		1.02157
62	G	2150	94	0.956543	0.990919		0.958495
62	H	2052	68	0.966712	1.00522		1.02097
62	I	2013	67	0.966571	1.00502		1.01998
62	K	3139	145	0.954199	0.987621		0.946096
62	L	2071	75	0.963734	1.00103		1.00096
62	M	1635	70	0.957407	0.992133		0.963223
62	N	2225	72	0.967469	1.00628		1.02633
62	P	2090	282	0.877035	0.879092		0.704464
62	Q	2336	115	0.951335	0.983593		0.931745
62	R	1679	36	0.978206	1.02139		1.11911
62	T	2260	68	0.969683	1.0094		1.04273
62	V	3473	133	0.96173	0.998213		0.988362
62	W	3469	157	0.955084	0.988866		0.950706
62	Y	2540	107	0.958062	0.993055		0.966872
63	*	3853	10537	0.260301	0.0116731		0.0261602
63	A	3628	201	0.945565	0.975477		0.905116
63	C	5155	296	0.943694	0.972846		0.897053
63	D	1597	137	0.918155	0.936926		0.806555
63	E	5214	337	0.937065	0.963523		0.870376
63	F	1802	206	0.893824	0.902705		0.741831
63	G	3824	246	0.937342	0.963912		0.871436
63	H	2299	164	0.93099	0.954978		0.848137
63	I	2834	266	0.911136	0.927054		0.786278
63	K	3755	202	0.94706	0.977581		0.911753
63	L	2018	175	0.917338	0.935777		0.804115
63	M	4814	410	0.918696	0.937687		0.808184
63	P	4652	246	0.947913	0.978781		0.915618
63	Q	2996	190	0.938176	0.965085		0.874657
63	R	3028	222	0.92921	0.952475		0.841964
63	S	2771	162	0.94273	0.97149		0.892996
63	T	3384	235	0.932696	0.957378		0.854193
63	V	3469	208	0.94135	0.969549		0.887297
63	W	4346	357	0.921356	0.941428		0.816332
63	Y	2875	408	0.871488	0.87129		0.693087
64	*	2328	7312	0.234536	-0.024564		-0.00505304
64	A	5383	225	0.958375	0.993495		0.968633
64	C	3353	83	0.974923	1.01677		1.08672
64	D	1460	54	0.96299	0.999985		0.996203
64	E	1775	63	0.964431	1.00201		1.00549
64	F	3242	83	0.974087	1.01559		1.07914
64	G	3442	197	0.943866	0.973088		0.897784
64	I	2424	61	0.974517	1.0162		1.08301
64	K	2870	140	0.951757	0.984187		0.933811
64	L	569	31	0.946421	0.976682		0.908894
64	M	3380	112	0.966714	1.00522		1.02098
64	N	2515	57	0.976991	1.01968		1.10661
64	P	2524	175	0.932796	0.957518		0.85455
64	Q	2480	126	0.949854	0.98151		0.924638
64	R	2198	684	0.755651	0.708368		0.516087
64	S	2851	105	0.963141	1.0002		0.997163
64	T	2254	125	0.945514	0.975406		0.904894
64	V	2997	110	0.963262	1.00037		0.997934
64	W	2516	82	0.967243	1.00597		1.02472
64	Y	1904	74	0.961182	0.997443		0.985031
65	*	2584	6692	0.270924	0.0266144		0.0384382
65	A	4597	192	0.958405	0.993537		0.968805
65	C	2380	42	0.981993	1.02671		1.16301
65	D	3581	136	0.962035	0.998642		0.990237
65	E	2539	115	0.955051	0.988819		0.95053
65	F	2077	130	0.938933	0.966151		0.877618
65	G	2732	217	0.923757	0.944806		0.82391
65	H	2033	44	0.978005	1.0211		1.117
65	I	2246	210	0.911447	0.927492		0.787146
65	K	3665	244	0.935297	0.961036		0.863702
65	L	2437	154	0.938382	0.965375		0.875459
65	M	1470	23	0.984002	1.02954		1.19014
65	P	2339	303	0.881361	0.885176		0.713647
65	Q	1899	72	0.962096	0.998728		0.990615
65	R	2146	195	0.913726	0.930696		0.793584
65	S	1825	57	0.968566	1.00783		1.03432
65	T	2917	993	0.738699	0.684525		0.495852
65	V	1576	94	0.94164	0.969957		0.888484
65	W	3433	101	0.970336	1.01032		1.04779
65	Y	1324	97	0.929257	0.952541		0.842127
66	*	3432	9758	0.25288	0.00123644		0.0173906
66	A	2794	5605	0.324197	0.101541		0.0960083
66	C	3681	2062	0.632078	0.534567		0.383576
66	D	2871	7861	0.260067	0.0113448		0.0258869
66	E	4967	12750	0.272678	0.0290805		0.0404352
66	G	2630	9002	0.219458	-0.0457709		-0.0244292
66	H	3549	6992	0.328172	0.107131		0.100085
66	I	2729	594	0.815544	0.792607		0.596668
66	K	4254	10075	0.288935	0.0519461		0.0585856
66	L	2931	485	0.853283	0.845685		0.658464
66	M	3237	344	0.900554	0.912171		0.758283
66	N	3154	9399	0.244106	-0.0111038		0.00679859
66	P	3224	3982	0.43794	0.261517		0.205343
66	Q	2034	5803	0.252234	0.000326713		0.0166182
66	R	1436	5256	0.20819	-0.0616197		-0.0395428
66	S	2039	6320	0.236923	-0.0212072		-0.00206675
66	T	1780	1997	0.461726	0.294971		0.227012
66	V	2423	1227	0.655221	0.567116		0.406327
66	W	3905	219	0.944934	0.97459		0.902368
66	Y	3651	194	0.947675	0.978445		0.914531
67	*	3513	9071	0.27151	0.0274379		0.0391059
67	A	2967	131	0.956133	0.990342		0.956282
67	C	3425	109	0.967989	1.00702		1.03008
67	D	1404	41	0.970549	1.01062		1.04947
67	E	3292	110	0.966444	1.00484		1.0191
67	F	2626	81	0.968944	1.00836		1.03713
67	G	2835	263	0.912078	0.928379		0.788914
67	H	3906	222	0.944235	0.973607		0.899359
67	I	1603	29	0.981548	1.02609		1.15741
67	K	3809	167	0.956427	0.990755		0.957864
67	M	2350	86	0.963366	1.00051		0.998596
67	N	2239	132	0.942276	0.970851		0.891106
67	P	1002	1218	0.44187	0.267044		0.208938
67	Q	4379	138	0.968292	1.00744		1.0323
67	R	3021	117	0.961313	0.997627		0.985825
67	S	2907	161	0.945582	0.975502		0.905193
67	T	2831	128	0.955126	0.988925		0.950927
67	V	3828	94	0.975119	1.01704		1.08853
67	W	4828	126	0.973598	1.0149		1.07481
67	Y	2847	167	0.942549	0.971236		0.892243
68	*	1899	5880	0.237109	-0.0209451		-0.00183448
68	A	2452	157	0.937617	0.964299		0.872493
68	C	1847	61	0.96682	1.00537		1.02173
68	D	5366	14107	0.267969	0.0224577		0.0350536
68	E	4010	11533	0.250718	-0.00180463		0.0148034
68	F	2309	5140	0.301829	0.0700811		0.0725524
68	G	5418	11270	0.31631	0.090448		0.0878407
68	H	3746	10492	0.255729	0.00524239		0.0207764
68	I	3430	97	0.971453	1.01189		1.05671
68	K	2343	8488	0.209891	-0.0592273		-0.0372238
68	L	2946	291	0.906913	0.921115		0.774766
68	M	3057	768	0.792989	0.760883		0.56434
68	N	4946	13403	0.262065	0.0141541		0.0282209
68	P	3844	1802	0.672442	0.591337		0.423726
68	Q	3237	9141	0.254171	0.00305213		0.0189283
68	R	4407	13109	0.244444	-0.0106295		0.00721043
68	S	3700	5200	0.406443	0.217217		0.176226
68	T	2512	469	0.837517	0.82351		0.631252
68	W	2915	8315	0.252267	0.000374315		0.0166586
68	Y	6200	16958	0.260272	0.0116326		0.0261265
69	*	4652	11809	0.274895	0.0321987		0.0429487
69	A	3059	139	0.954912	0.988624		0.949803
69	C	2408	60	0.974762	1.01654		1.08524
69	D	4434	189	0.957586	0.992385		0.964217
69	E	2472	83	0.966287	1.00462		1.01801
69	F	1832	141	0.925947	0.947886		0.831014
69	G	3542	167	0.953296	0.986351		0.941481
69	H	1848	60	0.967364	1.00614		1.02558
69	I	2561	59	0.976621	1.01916		1.10292
69	K	1234	22	0.981811	1.02646		1.16071
69	L	1867	60	0.967685	1.00659		1.02788
69	M	2863	151	0.948043	0.978963		0.91621
69	N	4153	266	0.937598	0.964272		0.872421
69	P	2807	2702	0.49994	0.348718		0.261537
69	R	3484	152	0.956632	0.991043		0.958975
69	S	4347	167	0.961613	0.998048		0.987646
69	T	2467	46	0.980993	1.02531		1.1506
69	V	1173	32	0.972434	1.01327		1.06482
69	W	3602	128	0.964389	1.00195		1.00522
69	Y	2385	76	0.967949	1.00696		1.02979
70	*	2328	7383	0.232806	-0.0269977		-0.00723133
70	C	2107	1370	0.596786	0.484928		0.349977
70	D	2204	113	0.949419	0.980898		0.922588
70	E	4273	233	0.946377	0.97662		0.9087
70	F	2485	70	0.971562	1.01204		1.05759
70	G	2794	114	0.959327	0.994834		0.974072
70	H	2363	92	0.961117	0.997351		0.984637
70	I	2194	99	0.955212	0.989046		0.951379
70	K	2660	180	0.934304	0.959639		0.86003
70	L	2977	85	0.971186	1.01151		1.05455
70	M	1689	37	0.977743	1.02074		1.11427
70	N	1568	16	0.989508	1.03728		1.28649
70	P	3615	444	0.88682	0.892854		0.725656
70	Q	5532	184	0.966593	1.00505		1.02013
70	R	2843	68	0.975749	1.01793		1.09446
70	S	1650	95	0.94355	0.972643		0.896442
70	T	2415	70	0.970762	1.01092		1.05115
70	V	4765	159	0.966489	1.00491		1.01941
70	W	2959	87	0.970354	1.01034		1.04794
70	Y	3686	126	0.965698	1.00379		1.01397
71	*	1557	5262	0.221643	-0.0426972		-0.0215636
71	A	3175	101	0.968003	1.00704		1.03018
71	C	2643	145	0.946067	0.976184		0.907326
71	D	2991	146	0.951726	0.984144		0.93366
71	E	1475	86	0.942876	0.971695		0.893605
71	F	3558	130	0.963422	1.00059		0.998956
71	H	2975	79	0.973148	1.01427		1.0709
71	I	2698	146	0.946763	0.977163		0.91042
71	K	3482	141	0.959621	0.995248		0.975779
71	L	3612	167	0.954159	0.987565		0.945893
71	M	1992	88	0.95611	0.990309		0.956157
71	N	3256	70	0.978149	1.02131		1.11851
71	P	3899	240	0.939884	0.967487		0.88138
71	Q	3145	106	0.966163	1.00445		1.01715
71	R	2127	111	0.948562	0.979693		0.918598
71	S	4284	154	0.963991	1.00139		1.00262
71	T	2764	159	0.943596	0.972709		0.89664
71	V	2667	204	0.92637	0.948481		0.832408
71	W	3343	261	0.924961	0.946498		0.82779
71	Y	2490	118	0.953068	0.986031		0.940332
72	*	4072	11263	0.258122	0.0086084		0.0236022
72	A	3431	122	0.964368	1.00192		1.00508
72	C	1792	30	0.982902	1.02799		1.17489
72	D	1553	64	0.958936	0.994284		0.971825
72	E	2073	77	0.962837	0.999771		0.995243
72	F	2055	33	0.983587	1.02896		1.18428
72	G	2417	57	0.976081	1.0184		1.09765
72	H	2017	35	0.982288	1.02713		1.1668
72	I	2505	62	0.974926	1.01677		1.08676
72	K	2265	93	0.95908	0.994487		0.972652
72	L	4441	209	0.953378	0.986466		0.941898
72	M	3149	166	0.948068	0.978998		0.916324
72	P	2637	51	0.980299	1.02433		1.14236
72	Q	2147	105	0.951639	0.984021		0.933234
72	R	3954	88	0.977396	1.02025		1.1107
72	S	2904	126	0.95686	0.991363		0.960216
72	T	2174	43	0.979861	1.02371		1.1373
72	V	3267	104	0.967981	1.007		1.03002
72	W	3262	80	0.975149	1.01709		1.08882
72	Y	2973	108	0.963625	1.00088		1.00026
73	*	2658	6904	0.270341	0.0257947		0.0377725
73	A	3736	178	0.952828	0.985692		0.939122
73	C	3940	153	0.961214	0.997487		0.985223
73	D	4628	212	0.954563	0.988133		0.947983
73	E	1425	92	0.937131	0.963616		0.870628
73	F	3435	131	0.961882	0.998427		0.989298
73	G	3023	201	0.935374	0.961145		0.863992
73	H	1681	49	0.970601	1.01069		1.04988
73	I	1818	44	0.975468	1.01754		1.0918
73	K	2463	83	0.966168	1.00446		1.01719
73	L	3238	89	0.972232	1.01298		1.06312
73	M	1836	115	0.938891	0.966092		0.877452
73	N	1986	55	0.972028	1.0127		1.06143
73	P	3470	518	0.865713	0.863167		0.681679
73	Q	2272	94	0.958781	0.994065		0.970937
73	R	2714	124	0.954676	0.988292		0.948569
73	S	3262	114	0.964958	1.00275		1.00898
73	T	2761	99	0.964079	1.00152		1.0032
73	W	1697	56	0.966847	1.00541		1.02191
73	Y	2650	231	0.916944	0.935223		0.802947
74	*	4392	11913	0.261882	0.0138968		0.0280076
74	A	1220	29	0.975895	1.01814		1.09586
74	C	2193	90	0.959099	0.994514		0.972761
74	D	2299	67	0.970607	1.0107		1.04993
74	E	4282	131	0.96919	1.00871		1.03898
74	F	5219	180	0.965402	1.00338		1.01196
74	G	4957	206	0.958605	0.993818		0.969935
74	H	2509	120	0.952655	0.985449		0.938257
74	I	3050	104	0.965781	1.00391		1.01453
74	K	2377	68	0.971132	1.01144		1.05411
74	L	1728	66	0.961827	0.99835		0.988958
74	M	4736	116	0.975181	1.01713		1.08911
74	N	2012	82	0.959371	0.994896		0.974328
74	P	881	48	0.946419	0.976679		0.908886
74	R	3505	97	0.972047	1.01272		1.06158
74	S	3577	114	0.967945	1.00695		1.02976
74	T	1667	35	0.978649	1.02201		1.12384
74	V	3329	102	0.969144	1.00864		1.03864
74	W	4675	148	0.968152	1.00725		1.03127
74	Y	791	40	0.950077	0.981823		0.925694
75	*	1894	4699	0.279484	0.0386533		0.0481122
75	A	3540	253	0.93087	0.954809		0.847715
75	C	3931	224	0.944098	0.973415		0.898775
75	D	3170	5364	0.362543	0.155473		0.134376
75	E	5281	2338	0.684916	0.608881		0.436621
75	F	3584	222	0.939528	0.966986		0.879965
75	G	2401	523	0.815431	0.792448		0.596498
75	H	3299	362	0.897649	0.908084		0.751063
75	I	3232	76	0.976148	1.01849		1.0983
75	K	1094	155	0.87167	0.871546		0.693454
75	M	2531	138	0.946382	0.976626		0.908719
75	N	2998	482	0.856853	0.850706		0.664958
75	P	1634	81	0.951013	0.98314		0.930184
75	Q	1937	200	0.903105	0.915759		0.764779
75	R	3934	432	0.89758	0.907988		0.750895
75	S	3531	561	0.858301	0.852743		0.667631
75	T	3580	524	0.867985	0.866364		0.686118
75	V	4732	155	0.967084	1.00574		1.02359
75	W	4091	705	0.848127	0.838433		0.649312
75	Y	2802	163	0.942998	0.971867		0.894117
76	*	4619	12326	0.265047	0.018349		0.0316849
76	A	3256	168	0.949113	0.980468		0.921157
76	C	3388	102	0.969665	1.00937		1.0426
76	D	4221	291	0.933152	0.958018		0.855833
76	E	2739	160	0.942774	0.971552		0.893178
76	F	1916	61	0.967977	1.007		1.03
76	G	1935	101	0.948553	0.97968		0.918553
76	H	701	12	0.982523	1.02746		1.16987
76	I	3964	85	0.978204	1.02138		1.11909
76	K	1724	76	0.956199	0.990434		0.956633
76	L	3123	151	0.952162	0.984756		0.935804
76	M	2390	94	0.960736	0.996815		0.98235
76	N	3816	251	0.936024	0.962059		0.866428
76	P	2629	159	0.940871	0.968876		0.885352
76	Q	1867	121	0.936905	0.963297		0.869762
76	S	1961	92	0.953516	0.986661		0.942601
76	T	2676	117	0.956542	0.990917		0.95849
76	V	4094	105	0.974041	1.01553		1.07873
76	W	4037	140	0.965218	1.00312		1.01072
76	Y	2301	52	0.977056	1.01977		1.10726
77	*	3018	8335	0.258413	0.00901782		0.0239447
77	A	3027	388	0.882462	0.886725		0.716031
77	C	2453	102	0.958582	0.993785		0.969803
77	D	2320	1654	0.574444	0.453505		0.329219
77	E	4636	2436	0.646829	0.555313		0.398
77	F	2934	2469	0.533497	0.395915		0.29184
77	G	2490	1467	0.620271	0.51796		0.372205
77	H	2131	1140	0.642722	0.549537		0.393958
77	I	1416	111	0.92468	0.946103		0.826879
77	K	2644	1539	0.623116	0.521961		0.374932
77	L	4856	359	0.92866	0.951701		0.840086
77	M	2893	476	0.853993	0.846684		0.659745
77	N	3144	708	0.810374	0.785335		0.589002
77	P	1808	230	0.883246	0.887827		0.717738
77	Q	3105	1722	0.634405	0.537839		0.385835
77	R	884	1135	0.428421	0.248129		0.196603
77	S	3131	437	0.873339	0.873894		0.696837
77	T	3064	147	0.952514	0.985252		0.937557
77	W	4092	3220	0.550153	0.419341		0.306966
77	Y	5021	1999	0.707364	0.640454		0.460552
78	*	3267	9846	0.242035	-0.0140179		0.00426004
78	A	1235	71	0.943629	0.972755		0.896779
78	C	2865	117	0.959293	0.994785		0.973873
78	D	2529	190	0.927586	0.950191		0.836458
78	E	2583	161	0.939171	0.966485		0.878555
78	F	2501	160	0.937667	0.96437		0.872687
78	G	2939	256	0.917001	0.935303		0.803116
78	H	2894	148	0.949541	0.98107		0.923161
78	K	2524	136	0.946979	0.977466		0.911386
78	L	2958	190	0.937431	0.964038		0.871779
78	M	3027	677	0.811424	0.786812		0.590546
78	N	2020	77	0.9619	0.998452		0.989404
78	P	2528	3763	0.392658	0.197829		0.163273
78	Q	2518	156	0.939517	0.966971		0.879921
78	R	2589	112	0.956982	0.991535		0.960884
78	S	3472	156	0.955394	0.989303		0.952341
78	T	1734	82	0.953163	0.986164		0.940808
78	V	2835	92	0.967379	1.00616		1.02569
78	W	2757	168	0.940452	0.968286		0.883657
78	Y	3585	189	0.948064	0.978992		0.916305
79	*	4107	14520	0.213963	-0.053499		-0.0317264
79	A	2739	155	0.944463	0.973927		0.900335
79	C	3414	131	0.961657	0.99811		0.987916
79	D	2840	199	0.932131	0.956583		0.85217
79	E	1640	33	0.979519	1.02323		1.13343
79	F	2026	44	0.977931	1.021		1.11622
79	H	3016	369	0.887207	0.893399		0.726528
79	I	2966	152	0.949441	0.980929		0.922689
79	K	3171	132	0.958538	0.993724		0.969557
79	L	3919	316	0.922691	0.943306		0.820519
79	M	2954	123	0.958527	0.993709		0.969496
79	N	1659	84	0.950017	0.981739		0.925409
79	P	3068	6582	0.309667	0.0811047		0.0808763
79	Q	2479	131	0.947948	0.978829		0.915774
79	R	1979	75	0.962112	0.998751		0.990714
79	S	1346	55	0.95927	0.994753		0.97374
79	T	2413	77	0.967906	1.0069		1.02948
79	V	3523	188	0.947463	0.978147		0.913568
79	W	2781	69	0.974866	1.01669		1.0862
79	Y	2582	107	0.958716	0.993975		0.970569
80	*	4175	10739	0.272271	0.0285083		0.0399725
80	A	3798	361	0.910111	0.925612		0.783438
80	C	2612	116	0.955888	0.989997		0.954968
80	D	4307	594	0.874654	0.875743		0.699529
80	E	3289	455	0.874317	0.875269		0.698835
80	F	2596	117	0.955263	0.989118		0.951648
80	G	3960	250	0.938438	0.965454		0.875677
80	I	2715	109	0.959953	0.995714		0.977717
80	K	3470	471	0.876391	0.878186		0.703121
80	L	4096	210	0.94942	0.9809		0.922592
80	M	3182	201	0.938405	0.965407		0.875547
80	N	2525	95	0.962376	0.999122		0.992351
80	P	4934	860	0.846656	0.836364		0.646748
80	Q	2185	113	0.949002	0.980311		0.920637
80	R	3979	413	0.902646	0.915113		0.763598
80	S	2560	193	0.927352	0.949862		0.835673
80	T	1545	72	0.953812	0.987077		0.94411
80	V	2469	616	0.794123	0.762478		0.5659
80	W	3464	234	0.93441	0.959789		0.860421
80	Y	4222	143	0.966002	1.00422		1.01604
81	*	2569	8718	0.220933	-0.0436964		-0.0224929
81	A	4398	134	0.969312	1.00888		1.0399
81	C	2458	112	0.954793	0.988457		0.94918
81	D	2323	63	0.972592	1.01349		1.06615
81	E	1908	33	0.982345	1.02721		1.16754
81	F	2314	86	0.962817	0.999743		0.995116
81	G	3078	178	0.943315	0.972313		0.89545
81	H	2698	137	0.94988	0.981547		0.924762
81	I	2829	88	0.968689	1.008		1.03523
81	K	2152	102	0.95306	0.98602		0.940293
81	L	1724	27	0.983987	1.02952		1.18992
81	M	4134	91	0.977638	1.02059		1.11318
81	N	3135	151	0.952336	0.985001		0.936669
81	P	2558	221	0.917621	0.936175		0.804958
81	Q	3503	93	0.973154	1.01428		1.07095
81	R	2671	84	0.968355	1.00753		1.03276
81	T	2385	75	0.968358	1.00753		1.03278
81	V	4225	211	0.950666	0.982652		0.928511
81	W	3053	101	0.966766	1.0053		1.02135
81	Y	2381	93	0.960996	0.997181		0.983911
82	*	3710	9609	0.270906	0.0265883		0.0384169
82	A	2230	295	0.879151	0.882068		0.708921
82	C	3446	450	0.880519	0.883992		0.711838
82	D	1906	439	0.806885	0.780428		0.58392
82	E	5173	1222	0.802913	0.774841		0.578218
82	F	2357	520	0.813506	0.789739		0.593626
82	G	3650	489	0.8778	0.880167		0.706067
82	H	2328	473	0.825679	0.80686		0.61219
82	I	2904	389	0.877815	0.880189		0.706099
82	K	2980	506	0.850023	0.841099		0.652647
82	L	3563	519	0.868538	0.86714		0.687207
82	N	1415	412	0.767723	0.725347		0.531081
82	P	2703	363	0.877541	0.879804		0.705524
82	Q	3007	379	0.884198	0.889166		0.719827
82	R	3346	1099	0.745547	0.694157		0.503919
82	S	4482	720	0.856953	0.850847		0.665142
82	T	2425	556	0.807594	0.781425		0.584947
82	V	2500	605	0.799064	0.769427		0.572774
82	W	4514	1953	0.689857	0.615831		0.441805
82	Y	2370	750	0.75254	0.703993		0.512306
83	*	2350	6609	0.25495	0.00414793		0.0198538
83	A	1770	56	0.968171	1.00727		1.03141
83	C	4867	146	0.969771	1.00952		1.04341
83	D	651	38	0.942814	0.971608		0.893347
83	E	1931	54	0.971762	1.01232		1.05923
83	F	2198	106	0.95228	0.984922		0.936389
83	G	2488	99	0.960294	0.996194		0.979727
83	H	1708	58	0.965917	1.0041		1.01546
83	I	2781	127	0.954697	0.988321		0.948678
83	K	1921	74	0.961512	0.997907		0.987035
83	L	3911	103	0.973363	1.01457		1.07276
83	M	1255	86	0.933527	0.958547		0.857194
83	N	3065	110	0.964048	1.00147		1.00299
83	P	3017	157	0.9487	0.979887		0.919237
83	R	4105	148	0.963889	1.00125		1.00196
83	S	2762	75	0.972558	1.01344		1.06586
83	T	2692	95	0.964627	1.00229		1.00679
83	V	3955	137	0.965256	1.00317		1.01098
83	W	4138	109	0.973358	1.01457		1.07271
83	Y	2222	97	0.956607	0.991008		0.958838
84	*	3874	9919	0.273184	0.0297924		0.0410101
84	A	2595	119	0.954516	0.988068		0.94774
84	C	2804	107	0.96186	0.998396		0.989162
84	D	1671	95	0.94422	0.973585		0.899293
84	E	1785	84	0.95338	0.98647		0.94191
84	F	2510	149	0.9419	0.970322		0.889553
84	G	2740	105	0.961705	0.998178		0.988211
84	H	1404	51	0.963627	1.00088		1.00027
84	I	2977	188	0.93842	0.965429		0.875608
84	K	2131	88	0.958855	0.99417		0.971362
84	L	1507	64	0.957736	0.992596		0.965047
84	M	2154	69	0.967786	1.00673		1.02861
84	P	2036	4617	0.297941	0.0646125		0.0683777
84	Q	1592	47	0.970236	1.01018		1.04701
84	R	1991	90	0.955136	0.988939		0.950978
84	S	2414	67	0.971968	1.01261		1.06093
84	T	3113	158	0.949902	0.981578		0.924866
84	V	3385	235	0.932715	0.957404		0.854259
84	W	3739	147	0.960751	0.996836		0.982437
84	Y	1052	83	0.924229	0.945469		0.825424
85	*	2960	8436	0.252432	0.000605785		0.0168553
85	A	1303	51	0.960918	0.997072		0.983442
85	D	4906	9057	0.342664	0.127515		0.114742
85	E	3285	7659	0.292168	0.0564927		0.0621208
85	F	1432	1196	0.535372	0.398552		0.293539
85	G	2535	525	0.82291	0.802966		0.60788
85	H	1276	593	0.67435	0.594021		0.425681
85	I	3783	2392	0.603489	0.494356		0.356273
85	K	2552	419	0.854258	0.847057		0.660225
85	L	2441	2478	0.486651	0.330027		0.249552
85	M	4193	1721	0.701017	0.631527		0.453683
85	N	3165	775	0.797167	0.766759		0.570121
85	P	2502	1353	0.640239	0.546044		0.391524
85	Q	2185	1955	0.518207	0.37441		0.278016
85	R	3118	1621	0.649259	0.558731		0.400402
85	S	2226	159	0.930906	0.95486		0.847842
85	T	2105	90	0.957462	0.992211		0.963529
85	V	4537	1780	0.710392	0.644712		0.463859
85	W	2310	6584	0.252418	0.000585629		0.0168381
85	Y	2570	2397	0.50783	0.359815		0.268652
86	*	2159	6904	0.231329	-0.0290744		-0.00909901
86	A	1697	37	0.977846	1.02088		1.11534
86	C	3544	123	0.965191	1.00308		1.01054
86	D	2958	146	0.951214	0.983423		0.931159
86	E	3343	100	0.969854	1.00964		1.04405
86	F	1426	67	0.953451	0.986569		0.942266
86	G	1199	59	0.951355	0.983621		0.931845
86	H	4255	97	0.97686	1.01949		1.10529
86	I	2015	94	0.953767	0.987013		0.943877
86	K	1749	169	0.908756	0.923706		0.77973
86	L	1239	24	0.980269	1.02429		1.14201
86	M	1311	2678	0.320245	0.095983		0.0919293
86	N	1654	100	0.94089	0.968902		0.885425
86	P	2780	7473	0.263625	0.0163489		0.0300364
86	Q	3119	233	0.927967	0.950726		0.837737
86	R	3905	137	0.964827	1.00257		1.00811
86	S	1782	37	0.97888	1.02234		1.12635
86	T	4010	67	0.982935	1.02804		1.17533
86	W	3817	9463	0.279632	0.0388613		0.0482777
86	Y	4172	443	0.900628	0.912274		0.758468
87	*	3174	7969	0.277092	0.0352897		0.045428
87	A	2035	522	0.789551	0.756047		0.559647
87	C	2967	373	0.88446	0.889535		0.720405
87	D	3611	7184	0.326021	0.104107		0.0978823
87	E	3505	4526	0.427022	0.246161		0.195315
87	F	2086	148	0.931338	0.955468		0.84936
87	G	4461	6275	0.406232	0.21692		0.176029
87	H	3165	3553	0.461575	0.294759		0.226876
87	I	4181	82	0.980027	1.02395		1.13921
87	K	2862	6703	0.291234	0.0551793		0.0611019
87	M	3409	137	0.959914	0.99566		0.97749
87	N	3729	4100	0.466746	0.302032		0.231563
87	P	4051	10646	0.268041	0.0225592		0.0351366
87	Q	3944	3637	0.510666	0.363804		0.27121
87	R	2834	6886	0.283703	0.0445878		0.0528139
87	S	4063	2037	0.657479	0.570292		0.408584
87	T	3680	521	0.871754	0.871664		0.693623
87	V	3709	100	0.972748	1.01371		1.06747
87	W	2294	3043	0.420454	0.236923		0.189251
87	Y	3467	1378	0.707711	0.640942		0.460929
88	*	2535	6955	0.25968	0.0108001		0.0254329
88	A	3799	149	0.960841	0.996963		0.98298
88	C	3363	145	0.957119	0.991728		0.961634
88	D	3653	91	0.974768	1.01655		1.0853
88	E	4914	120	0.975253	1.01723		1.08979
88	F	1025	47	0.95452	0.988073		0.947759
88	G	4771	276	0.943297	0.972287		0.895373
88	H	2401	99	0.958915	0.994254		0.971703
88	I	2416	76	0.968347	1.00752		1.03271
88	L	3201	101	0.968254	1.00739		1.03202
88	M	2520	60	0.975857	1.01808		1.09549
88	N	3837	129	0.966244	1.00456		1.01771
88	P	2618	831	0.751975	0.703197		0.511622
88	Q	4256	68	0.983669	1.02907		1.18541
88	R	2546	120	0.953311	0.986372		0.941557
88	S	2993	147	0.951443	0.983745		0.932272
88	T	1270	41	0.967543	1.00639		1.02686
88	V	2771	79	0.971228	1.01157		1.05488
88	W	3677	137	0.962727	0.999616		0.99455
88	Y	1686	30	0.981846	1.02651		1.16115
89	*	2445	7844	0.230752	-0.0298859		-0.00983117
89	A	2879	1120	0.71213	0.647157		0.465766
89	C	2463	459	0.837769	0.823865		0.63167
89	D	3981	9555	0.286203	0.0481039		0.0555798
89	E	5218	12523	0.286219	0.0481265		0.0555975
89	F	2190	48	0.977732	1.02072		1.11415
89	G	3165	9241	0.247897	-0.00577292		0.011405
89	H	1622	2973	0.344281	0.129788		0.116358
89	I	1218	42	0.965408	1.00339		1.012
89	K	3686	11609	0.234046	-0.0252532		-0.00566878
89	M	2416	109	0.955219	0.989056		0.951415
89	N	3622	8832	0.282982	0.0435728		0.0520128
89	P	1882	5260	0.256134	0.00581247		0.0212562
89	Q	4424	8658	0.329642	0.109199		0.101586
89	R	2688	6329	0.290139	0.0536393		0.0599049
89	S	1951	3092	0.377813	0.17695		0.149142
89	T	1937	1814	0.50681	0.35838		0.267732
89	V	2918	202	0.932894	0.957657		0.854904
89	W	3265	5700	0.355358	0.145367		0.127337
89	Y	3282	1222	0.721035	0.659681		0.475651
90	*	3895	12080	0.236815	-0.0213591		-0.00220151
90	A	3285	138	0.958174	0.993212		0.967498
90	C	2969	128	0.957123	0.991733		0.961656
90	D	2245	80	0.964294	1.00182		1.00459
90	E	2040	58	0.971304	1.01168		1.0555
90	F	2345	61	0.973681	1.01502		1.07554
90	G	2973	192	0.937113	0.96359		0.870559
90	H	2913	103	0.96456	1.00219		1.00635
90	I	2376	58	0.975262	1.01725		1.08987
90	L	3220	81	0.974527	1.01621		1.0831
90	M	2758	53	0.980423	1.0245		1.1438
90	N	1575	87	0.945717	0.975692		0.905786
90	P	2500	368	0.867335	0.865449		0.684842
90	Q	3455	114	0.96685	1.00542		1.02194
90	R	5065	134	0.973245	1.01441		1.07173
90	S	2020	51	0.974436	1.01608		1.08227
90	T	3211	88	0.972311	1.0131		1.06378
90	V	4229	129	0.969277	1.00883		1.03964
90	W	1059	41	0.961326	0.997645		0.985902
90	Y	3689	113	0.969152	1.00865		1.0387
91	*	3082	7767	0.276344	0.0342372		0.0445852
91	A	1776	144	0.922295	0.942749		0.81927
91	C	2659	98	0.963115	1.00016		0.996999
91	D	3542	10372	0.247352	-0.00653839		0.0107465
91	E	3206	7930	0.280094	0.039512		0.0487952
91	F	3425	5768	0.363643	0.15702		0.135448
91	G	1783	1989	0.463142	0.296963		0.228297
91	H	3142	7630	0.28382	0.0447515		0.0529431
91	I	3416	68	0.979734	1.02354		1.13585
91	K	4330	12888	0.244328	-0.0107916		0.0070697
91	L	2488	19	0.992127	1.04097		1.35182
91	M	2773	82	0.970189	1.01011		1.04664
91	N	2753	5746	0.315576	0.0894159		0.0870753
91	P	4279	8595	0.323918	0.101148		0.0957206
91	Q	3496	7651	0.305428	0.075143		0.0763894
91	R	3418	8746	0.273308	0.0299666		0.0411507
91	S	2848	323	0.894576	0.903762		0.743622
91	T	2648	51	0.98038	1.02444		1.1433
91	W	4584	12466	0.261382	0.0131938		0.0274244
91	Y	3675	10182	0.2578	0.00815622		0.0232236
92	*	1698	5312	0.235253	-0.0235554		-0.00415361
92	A	2376	74	0.968652	1.00795		1.03495
92	C	2775	71	0.974102	1.01561		1.07928
92	E	2480	72	0.970716	1.01085		1.05079
92	F	4087	155	0.962086	0.998714		0.990553
92	G	580	16	0.972134	1.01285		1.0623
92	H	2570	74	0.970949	1.01118		1.05265
92	I	3682	126	0.965662	1.00374		1.01372
92	K	1573	71	0.955199	0.989028		0.951311
92	L	2319	87	0.962479	0.999267		0.992997
92	M	2806	77	0.972276	1.01305		1.06349
92	N	2774	73	0.973383	1.0146		1.07293
92	P	3848	105	0.972428	1.01326		1.06476
92	Q	2271	74	0.96725	1.00598		1.02476
92	R	1649	48	0.970641	1.01075		1.0502
92	S	2169	63	0.970703	1.01083		1.05068
92	T	2676	90	0.966232	1.00455		1.01763
92	V	1335	53	0.960381	0.996317		0.98024
92	W	2416	85	0.964731	1.00243		1.00748
92	Y	2586	100	0.96137	0.997707		0.98617
93	*	4178	10026	0.286241	0.0481563		0.0556209
93	A	3808	108	0.971373	1.01178		1.05606
93	C	2609	59	0.977041	1.01975		1.10711
93	D	3497	151	0.957058	0.991643		0.961302
93	E	1700	50	0.970344	1.01033		1.04786
93	F	2847	64	0.977174	1.01994		1.10845
93	G	2811	107	0.961952	0.998525		0.989724
93	H	2853	91	0.96792	1.00692		1.02958
93	I	2210	81	0.963312	1.00044		0.998253
93	K	763	57	0.927965	0.950724		0.837732
93	L	1972	28	0.98546	1.03159		1.21202
93	M	2771	85	0.96911	1.00859		1.03838
93	N	1219	41	0.966231	1.00454		1.01762
93	P	3171	366	0.892909	0.901418		0.739665
93	Q	3973	213	0.947231	0.977821		0.912522
93	R	2364	45	0.980604	1.02476		1.14594
93	S	1695	63	0.962814	0.999739		0.995098
93	V	2748	91	0.966735	1.00525		1.02113
93	W	2042	132	0.937057	0.963512		0.870345
93	Y	3160	119	0.962343	0.999075		0.992145
94	*	3608	9091	0.276379	0.0342861		0.0446244
94	C	1397	52	0.962762	0.999665		0.994768
94	D	2788	183	0.936149	0.962235		0.866899
94	E	3418	117	0.965652	1.00373		1.01366
94	F	2180	30	0.985902	1.03221		1.21907
94	G	4299	166	0.961424	0.997783		0.986497
94	H	1835	61	0.966611	1.00508		1.02026
94	I	2149	72	0.966357	1.00472		1.01849
94	K	3260	94	0.97091	1.01112		1.05233
94	L	1870	38	0.979321	1.02295		1.13121
94	M	4622	143	0.968852	1.00823		1.03645
94	N	2531	105	0.958673	0.993914		0.970325
94	P	2533	84	0.966689	1.00519		1.0208
94	Q	2258	103	0.954745	0.98839		0.948932
94	R	1365	95	0.932558	0.957184		0.853698
94	S	2396	116	0.952102	0.984672		0.93551
94	T	2413	88	0.963488	1.00069		0.999378
94	V	3821	152	0.960305	0.996209		0.979788
94	W	4738	174	0.963242	1.00034		0.997805
94	Y	2769	97	0.964878	1.00264		1.00845
95	*	4009	9670	0.285192	0.0466817		0.0544628
95	A	3640	2797	0.556032	0.427609		0.312327
95	C	3490	733	0.820854	0.800075		0.604715
95	D	1207	1424	0.449251	0.277426		0.215674
95	E	2566	7313	0.252435	0.000609415		0.0168583
95	F	4102	8249	0.323665	0.100792		0.09546
95	G	2749	2954	0.472456	0.310062		0.23673
95	H	4106	1686	0.700929	0.631403		0.453588
95	I	4152	9395	0.298395	0.0652513		0.068867
95	K	3017	3454	0.4567	0.287902		0.22245
95	L	3093	4782	0.383651	0.18516		0.154723
95	M	3230	2671	0.537844	0.402028		0.29578
95	P	3535	7605	0.309073	0.0802693		0.0802496
95	Q	4218	945	0.81116	0.786441		0.590158
95	R	4804	7202	0.390961	0.195442		0.161668
95	S	3360	911	0.780193	0.742885		0.547152
95	T	2527	6363	0.276512	0.034473		0.0447741
95	V	3945	11014	0.256339	0.00610135		0.0214991
95	W	3548	9097	0.272907	0.0294027		0.0406954
95	Y	3776	5674	0.390409	0.194666		0.161145
96	*	2601	7675	0.24593	-0.00853864		0.00902113
96	A	1749	41	0.97622	1.01859		1.099
96	C	3241	138	0.95763	0.992447		0.964459
96	D	3072	101	0.966965	1.00558		1.02275
96	E	1958	38	0.980232	1.02424		1.14157
96	F	937	68	0.929878	0.953414		0.844262
96	G	3108	63	0.979371	1.02303		1.13177
96	H	2158	89	0.958906	0.994242		0.971653
96	I	1311	70	0.947434	0.978106		0.913438
96	K	2354	129	0.946124	0.976264		0.907579
96	L	2935	134	0.954707	0.988336		0.948733
96	M	1575	22	0.985693	1.03192		1.21571
96	N	4099	98	0.975759	1.01794		1.09456
96	Q	2565	56	0.977817	1.02084		1.11503
96	R	3293	81	0.975077	1.01699		1.08815
96	S	3606	116	0.967654	1.00655		1.02766
96	T	2198	68	0.968854	1.00823		1.03646
96	V	2148	95	0.956062	0.990242		0.9559
96	W	2754	62	0.977142	1.01989		1.10812
96	Y	3146	67	0.978349	1.02159		1.12063
97	*	2832	7792	0.259133	0.0100308		0.0247911
97	A	1297	33	0.974243	1.01581		1.08053
97	C	3229	174	0.946975	0.977461		0.911369
97	D	1959	222	0.89465	0.903867		0.7438
97	E	4495	432	0.909202	0.924334		0.780946
97	F	3041	274	0.91439	0.93163		0.79549
97	G	2925	278	0.910117	0.925621		0.783456
97	H	2313	209	0.914166	0.931316		0.794848
97	I	2868	189	0.935912	0.961901		0.866004
97	L	2667	89	0.966486	1.0049		1.01939
97	M	1939	110	0.944333	0.973744		0.899777
97	N	850	58	0.933791	0.958917		0.858152
97	P	2649	1603	0.613949	0.509068		0.366173
97	Q	2028	130	0.93755	0.964205		0.872236
97	R	2957	116	0.960833	0.996952		0.982933
97	S	4405	303	0.933292	0.958216		0.856342
97	T	1708	145	0.918936	0.938025		0.808909
97	V	3097	106	0.965656	1.00374		1.01368
97	W	3364	491	0.868308	0.866817		0.686753
97	Y	3985	278	0.93241	0.956975		0.853165
98	*	2600	6993	0.263518	0.016198		0.0299118
98	A	2740	400	0.868286	0.866786		0.686709
98	C	3161	329	0.902404	0.914772		0.762978
98	D	5221	2532	0.664924	0.580763		0.416076
98	E	2770	1718	0.608098	0.500838		0.360624
98	F	1183	809	0.58459	0.467776		0.338605
98	G	3276	366	0.895984	0.905744		0.747009
98	H	2897	1214	0.696649	0.625383		0.449004
98	I	4546	9907	0.306325	0.076404		0.0773414
98	K	2097	727	0.735162	0.679551		0.49174
98	L	3482	3073	0.521634	0.379229		0.28111
98	M	4406	909	0.823467	0.803749		0.608743
98	N	2352	216	0.912885	0.929514		0.791191
98	P	2517	2136	0.531401	0.392966		0.289942
98	Q	2302	441	0.833983	0.81854		0.625449
98	R	3121	1066	0.738053	0.683618		0.495099
98	S	2385	1177	0.661025	0.575279		0.412142
98	V	2638	616	0.804737	0.777406		0.580825
98	W	5627	10500	0.340254	0.124124		0.112326
98	Y	4643	3028	0.596065	0.483914		0.349301
99	*	3031	7715	0.274355	0.0314397		0.042338
99	A	3964	467	0.890934	0.89864		0.735047
99	C	1816	40	0.977624	1.02057		1.11304
99	D	4190	2842	0.586576	0.470569		0.34045
99	E	3708	1116	0.761764	0.716967		0.523616
99	F	3179	2026	0.601601	0.4917		0.354496
99	G	2057	336	0.854896	0.847954		0.661382
99	H	2008	354	0.845173	0.834279		0.644183
99	I	2649	481	0.84127	0.828789		0.637527
99	K	3598	2675	0.56416	0.439042		0.319764
99	L	2230	2136	0.501176	0.350456		0.262651
99	M	3004	1531	0.653772	0.565077		0.404882
99	N	3669	1368	0.720754	0.659286		0.475337
99	Q	3384	1317	0.712045	0.647038		0.465673
99	R	3106	2835	0.513229	0.367409		0.273523
99	S	2900	388	0.877943	0.880369		0.706369
99	T	1434	172	0.889177	0.89617		0.731
99	V	3638	2518	0.581663	0.463659		0.335891
99	W	2633	1219	0.675185	0.595194		0.426538
99	Y	3986	1246	0.75482	0.707199		0.515074
100	*	2278	5316	0.29198	0.0562285		0.061916
100	A	2090	90	0.95717	0.9918		0.961917
100	C	1496	131	0.916597	0.934735		0.801923
100	D	3441	212	0.939832	0.967415		0.881176
100	E	4538	188	0.958728	0.993992		0.970639
100	F	2010	73	0.963634	1.00089		1.00031
100	G	885	55	0.93934	0.966722		0.87922
100	H	3519	153	0.956774	0.991243		0.95975
100	I	1837	78	0.957743	0.992606		0.965089
100	L	2451	80	0.967196	1.0059		1.02438
100	M	2643	83	0.968399	1.00759		1.03309
100	N	2532	118	0.953811	0.987075		0.944102
100	P	2311	124	0.94719	0.977763		0.912335
100	Q	958	43	0.955438	0.989364		0.952571
100	R	1019	68	0.935155	0.960836		0.863174
100	S	2325	87	0.962572	0.999398		0.993579
100	T	1723	113	0.9362	0.962306		0.867088
100	V	2083	62	0.969999	1.00984		1.04517
100	W	1225	53	0.956977	0.991528		0.960856
100	Y	1929	64	0.966674	1.00517		1.0207
101	*	2489	4995	0.324116	0.101427		0.0959245
101	A	2264	131	0.943285	0.972271		0.895324
101	C	1353	59	0.956652	0.991071		0.959084
101	D	2538	5308	0.315139	0.0888007		0.0866186
101	E	2052	4943	0.285463	0.0470629		0.0547624
101	F	1905	97	0.949749	0.981362		0.92414
101	G	2587	810	0.754518	0.706775		0.514707
101	H	1806	87	0.952329	0.984992		0.936637
101	I	2909	505	0.847179	0.8371		0.647657
101	K	3465	565	0.855113	0.848259		0.661776
101	L	2612	327	0.884887	0.890136		0.721348
101	M	2925	185	0.938331	0.965304		0.875262
101	N	1945	145	0.928104	0.950919		0.8382
101	P	3925	9804	0.278124	0.0367401		0.0465871
101	Q	2458	423	0.848305	0.838683		0.649624
101	R	3644	339	0.911853	0.928063		0.788281
101	S	2479	181	0.929481	0.952856		0.842896
101	T	2763	241	0.916897	0.935156		0.802807
101	V	3876	511	0.879513	0.882577		0.709689
101	W	3765	121	0.967684	1.00659		1.02788
102	*	2114	3680	0.356017	0.146294		0.127985
102	A	2921	117	0.960042	0.995839		0.978237
102	C	2328	56	0.975614	1.01774		1.09318
102	D	3708	109	0.97036	1.01035		1.04798
102	E	3398	114	0.966313	1.00466		1.01819
102	F	2576	149	0.943304	0.972297		0.895404
102	G	2061	175	0.918922	0.938006		0.808868
102	H	1852	75	0.959619	0.995244		0.975763
102	I	5159	261	0.950056	0.981794		0.925595
102	L	3429	192	0.945016	0.974706		0.902726
102	M	2770	105	0.962104	0.998739		0.990666
102	N	2587	202	0.924953	0.946487		0.827764
102	P	1856	6122	0.225861	-0.0367649		-0.0160892
102	Q	2738	373	0.875995	0.877629		0.702299
102	R	3812	99	0.973723	1.01508		1.07591
102	S	3197	167	0.948515	0.979627		0.91838
102	T	1902	67	0.964689	1.00237		1.00719
102	V	2536	112	0.956122	0.990326		0.956222
102	W	4360	457	0.901782	0.913897		0.76139
102	Y	4290	162	0.962242	0.998934		0.991523
103	*	4018	6288	0.380784	0.181128		0.151986
103	A	3295	175	0.947698	0.978478		0.914639
103	C	1760	73	0.958681	0.993926		0.97037
103	D	4739	6304	0.419769	0.235959		0.188617
103	E	3332	1477	0.684644	0.608498		0.436337
103	G	3599	725	0.826909	0.80859		0.614122
103	H	3793	123	0.967402	1.00619		1.02585
103	I	3324	100	0.969687	1.0094		1.04276
[truncated: 4,046 more rows]

## Sheet: Growth scores rep 2
Position	aa	Counts (0 hours)	Counts (16 hours)	functional score (unnormalized)	functional score (normalized)		selection coefficient
WT	WT	66787	1481	0.97	1		1
1	*	3239	7278	0.221857	-0.0192683		0.0237236
1	A	1573	2	0.998019	1.03817		1.68331
1	C	1611	187	0.846605	0.831887		0.681391
1	D	3708	251	0.904436	0.910675		0.801089
1	E	3986	473	0.843719	0.827955		0.676496
1	F	1450	49	0.949894	0.972608		0.955281
1	G	2587	10	0.994002	1.0327		1.43651
1	H	3043	7	0.996422	1.036		1.55171
1	I	3190	8	0.996101	1.03556		1.53254
1	K	3239	5	0.997596	1.0376		1.64025
1	L	803	2	0.996127	1.0356		1.53407
1	M	3252	21	0.990021	1.02728		1.32261
1	N	2615	5	0.997024	1.03682		1.59275
1	P	1017	75	0.89677	0.900231		0.782074
1	Q	2174	4	0.997136	1.03697		1.60128
1	R	940	3	0.995043	1.03412		1.47904
1	T	2176	2	0.998567	1.03892		1.75533
1	V	1257	1	0.99876	1.03918		1.78738
1	W	3063	6	0.996952	1.03672		1.58738
1	Y	2253	1	0.999308	1.03993		1.9169
2	*	3871	8737	0.221088	-0.0203166		0.0227331
2	A	3032	1642	0.541907	0.416767		0.33954
2	C	1830	512	0.696029	0.626743		0.486127
2	D	1680	3086	0.258579	0.0307616		0.0684492
2	E	3021	3814	0.336624	0.13709		0.15168
2	F	1695	685	0.613188	0.51388		0.404509
2	H	2739	534	0.766682	0.722999		0.566298
2	I	2702	1462	0.542125	0.417064		0.339736
2	K	2244	1190	0.547115	0.423863		0.344201
2	L	2955	2405	0.44045	0.278542		0.249126
2	M	2684	1161	0.596942	0.491747		0.389417
2	N	1191	519	0.595165	0.489326		0.387779
2	P	482	286	0.519157	0.385773		0.319264
2	Q	2837	2108	0.462998	0.309262		0.269337
2	R	2128	1001	0.576616	0.464055		0.370808
2	S	2170	1282	0.520244	0.387253		0.32023
2	T	1827	1003	0.538522	0.412155		0.336516
2	V	3094	1199	0.623092	0.527373		0.413821
2	W	2503	544	0.746685	0.695756		0.542181
2	Y	2192	1506	0.482525	0.335865		0.286727
3	*	1951	3308	0.274226	0.0520788		0.0862233
3	A	4090	8029	0.246048	0.0136898		0.0537042
3	C	2317	3234	0.314593	0.107075		0.129405
3	D	3973	8416	0.232206	-0.00516941		0.036814
3	E	3306	7307	0.224718	-0.0153702		0.0273853
3	G	4849	10591	0.226792	-0.0125456		0.030018
3	H	2958	7404	0.203787	-0.0438871		-0.000228601
3	I	1977	466	0.731032	0.674431		0.52417
3	L	2211	158	0.899648	0.904153		0.789061
3	M	3006	424	0.819557	0.795036		0.638139
3	N	1780	4348	0.207775	-0.0384533		0.00518804
3	P	5231	5905	0.362049	0.171729		0.176515
3	Q	2938	6749	0.21807	-0.0244281		0.0188242
3	R	3490	7117	0.239055	0.00416152		0.0452546
3	S	2217	4582	0.236626	0.000853171		0.0422813
3	T	1356	2228	0.280527	0.0606631		0.0932008
3	V	3200	2261	0.475534	0.326341		0.280509
3	W	2035	348	0.789309	0.753827		0.595395
3	Y	1891	2711	0.308851	0.0992519		0.123465
4	*	3045	6902	0.220356	-0.021314		0.0217884
4	A	2540	1779	0.477722	0.329321		0.282455
4	C	2128	147	0.902667	0.908266		0.796586
4	D	3771	8815	0.215109	-0.0284618		0.0149513
4	E	2136	4672	0.226543	-0.0128848		0.0297028
4	F	3258	4356	0.323939	0.119809		0.138951
4	G	3863	6679	0.270358	0.0468086		0.0818902
4	H	4153	1731	0.605837	0.503865		0.397653
4	I	1575	60	0.943873	0.964405		0.928683
4	K	1100	11	0.984631	1.01993		1.22555
4	L	3301	448	0.825188	0.802709		0.646697
4	M	2475	1327	0.544391	0.420152		0.341763
4	N	1609	1142	0.474409	0.324808		0.279507
4	P	2028	965	0.573805	0.460225		0.368254
4	Q	1053	481	0.583764	0.473793		0.377322
4	S	2411	56	0.965013	0.993205		1.0385
4	T	2880	479	0.793894	0.760074		0.601564
4	V	2041	11	0.991657	1.02951		1.36274
4	W	1867	4463	0.211356	-0.0335755		0.00998539
4	Y	2904	4637	0.286332	0.0685728		0.0995456
5	*	4022	9624	0.21119	-0.0338008		0.00976514
5	A	3166	127	0.941075	0.960592		0.917224
5	C	4364	130	0.955567	0.980337		0.983271
5	D	3707	3776	0.386102	0.204498		0.199322
5	E	3667	2679	0.467208	0.314998		0.273093
5	F	1467	7	0.992607	1.0308		1.38977
5	G	3396	2189	0.498467	0.357585		0.300886
5	H	1641	32	0.97046	1.00063		1.07732
5	I	2800	48	0.973938	1.00537		1.10591
5	L	1894	14	0.988594	1.02533		1.29263
5	M	794	6	0.988342	1.02499		1.28773
5	N	2501	344	0.823249	0.800067		0.643726
5	P	831	62	0.895688	0.898758		0.779493
5	Q	1279	243	0.771268	0.729248		0.572028
5	R	3881	298	0.892972	0.895058		0.773114
5	S	2569	120	0.932042	0.948287		0.88343
5	T	644	84	0.830841	0.81041		0.655507
5	V	3428	270	0.890516	0.891711		0.767467
5	W	3293	13	0.993876	1.03253		1.43184
5	Y	1340	296	0.743603	0.691557		0.538579
6	*	1990	5161	0.198089	-0.0516498		-0.00810542
6	A	3090	3887	0.337434	0.138193		0.152484
6	C	1558	1491	0.400993	0.224786		0.213171
6	D	3862	8534	0.224757	-0.0153178		0.0274343
6	E	1834	4927	0.192551	-0.0591943		-0.015926
6	F	628	236	0.630281	0.537168		0.420642
6	G	4191	8539	0.239215	0.00437966		0.0454499
6	H	1982	3307	0.277435	0.0564511		0.0897894
6	I	2503	122	0.929297	0.944546		0.873985
6	K	1343	2940	0.226393	-0.0130879		0.0295139
6	L	3245	782	0.726658	0.668471		0.519258
6	N	2520	5176	0.237749	0.00238318		0.0436589
6	P	2486	5389	0.228118	-0.0107388		0.0316932
6	Q	3378	1512	0.588693	0.480508		0.381832
6	R	3231	6419	0.243837	0.0106774		0.0510506
6	S	2195	3255	0.301683	0.0894866		0.115963
6	T	2857	2246	0.449012	0.290207		0.256822
6	V	3272	611	0.774304	0.733384		0.575865
6	W	3513	2530	0.470775	0.319857		0.276271
6	Y	4200	2791	0.490851	0.347208		0.294124
7	*	2303	4823	0.23425	-0.00238469		0.0393509
7	C	1608	85	0.923777	0.937026		0.855978
7	D	3459	7414	0.230113	-0.00802108		0.0342
7	E	1986	3726	0.254549	0.0252706		0.0637592
7	F	2234	3772	0.275061	0.053216		0.0871533
7	G	3608	5400	0.299741	0.0868408		0.113913
7	H	3528	7573	0.229853	-0.00837515		0.0338742
7	I	3710	4461	0.347595	0.152037		0.1625
7	K	2136	4881	0.218966	-0.0232067		0.0199895
7	L	1630	4829	0.177797	-0.0792956		-0.0376393
7	M	4714	10764	0.219094	-0.0230331		0.0201548
7	N	3717	6590	0.265432	0.0400986		0.0763165
7	P	2446	3003	0.34289	0.145626		0.15788
7	Q	2221	5429	0.207661	-0.0386091		0.00503382
7	R	3281	7715	0.214114	-0.0298175		0.013641
7	S	1270	127	0.864982	0.856924		0.714481
7	T	2796	274	0.867327	0.860119		0.718971
7	V	2092	122	0.916565	0.927201		0.834173
7	W	4563	10815	0.212782	-0.0316326		0.0118797
7	Y	2047	4220	0.237082	0.00147395		0.0428408
8	*	1341	3163	0.213595	-0.0305246		0.0129558
8	A	3382	160	0.931232	0.947182		0.880605
8	C	3387	208	0.912526	0.921698		0.8227
8	D	5407	6375	0.352065	0.158127		0.166862
8	E	2546	3131	0.342513	0.145113		0.157509
8	G	2899	5409	0.255596	0.0266981		0.0649831
8	H	3694	133	0.94679	0.968379		0.941213
8	I	3064	3979	0.330352	0.128545		0.145417
8	K	897	1438	0.285521	0.0674673		0.0986636
8	L	2681	537	0.761816	0.716371		0.560304
8	M	3418	591	0.787465	0.751314		0.592941
8	N	1930	676	0.646524	0.559298		0.436262
8	P	1391	2724	0.246501	0.014306		0.054245
8	Q	857	53	0.911964	0.920933		0.821143
8	R	2749	3884	0.311973	0.103505		0.126702
8	S	5566	1264	0.738292	0.684322		0.532437
8	T	1154	576	0.562077	0.444247		0.357646
8	V	3868	3317	0.42761	0.261049		0.237524
8	W	3571	142	0.941557	0.96125		0.919163
8	Y	2853	30	0.983851	1.01887		1.2144
9	*	2205	4980	0.220976	-0.0204687		0.0225892
9	A	1914	2964	0.292633	0.0771568		0.106345
9	C	1346	1999	0.301367	0.0890563		0.11563
9	D	2330	5478	0.214139	-0.029784		0.0136735
9	E	1753	4168	0.212254	-0.0323517		0.0111796
9	F	528	1159	0.225919	-0.0137348		0.0289117
9	G	2246	5847	0.197489	-0.0524674		-0.00894488
9	H	2631	5810	0.224871	-0.015162		0.02758
9	I	3233	10733	0.161759	-0.101146		-0.0629094
9	K	2922	7450	0.200811	-0.0479409		-0.00432112
9	L	1319	3665	0.187363	-0.0662636		-0.023411
9	M	2390	5219	0.22683	-0.0124931		0.0300668
9	N	3033	7766	0.200129	-0.0488706		-0.00526604
9	Q	2341	6129	0.196591	-0.0536908		-0.0102046
9	R	3328	7716	0.216495	-0.0265735		0.0167691
9	S	1980	4426	0.222755	-0.0180453		0.024876
9	T	923	2129	0.217369	-0.0253826		0.0179113
9	V	1778	4709	0.194776	-0.0561638		-0.0127644
9	W	4175	9665	0.216754	-0.0262203		0.0171082
9	Y	3571	9022	0.20228	-0.0459403		-0.00229573
10	*	3205	7958	0.205095	-0.0421053		0.00155621
10	A	2382	5467	0.218219	-0.0242247		0.0190186
10	C	3474	4353	0.338308	0.139384		0.153351
10	D	1861	4268	0.218348	-0.0240484		0.0191869
10	E	4865	11035	0.220236	-0.0214766		0.0216342
10	F	2717	5983	0.225364	-0.0144911		0.0282065
10	G	3135	7668	0.207557	-0.0387501		0.00489416
10	H	1125	2407	0.23043	-0.00758823		0.0345978
10	I	1784	4613	0.198562	-0.0510053		-0.00744504
10	K	3557	9256	0.197556	-0.052376		-0.00885092
10	L	3491	7716	0.224716	-0.0153736		0.0273822
10	M	3011	7313	0.208719	-0.0371681		0.00645789
10	N	3668	8131	0.224206	-0.0160683		0.026732
10	P	808	1775	0.225783	-0.0139199		0.0287392
10	Q	1863	4167	0.222649	-0.0181889		0.0247408
10	R	3191	7153	0.222271	-0.0187048		0.0242549
10	T	1094	29	0.960266	0.986739		1.00917
10	V	2592	6098	0.214028	-0.0299351		0.0135272
10	W	2402	6305	0.196183	-0.0542472		-0.010779
10	Y	2630	6540	0.204852	-0.0424356		0.00122602
11	*	2846	7554	0.194435	-0.0566285		-0.0132474
11	A	4348	6632	0.29578	0.0814439		0.109708
11	C	2848	6961	0.207676	-0.0385886		0.00505408
11	D	4807	10045	0.234641	-0.00185121		0.0398351
11	E	1641	3038	0.257084	0.0287251		0.0667154
11	F	4611	10388	0.221406	-0.0198829		0.0231432
11	H	2621	5949	0.220123	-0.0216314		0.0214872
11	I	4381	9515	0.227782	-0.0111962		0.0312698
11	K	2042	4620	0.220673	-0.0208818		0.022198
11	L	3126	8248	0.195368	-0.0553573		-0.0119276
11	M	2747	5822	0.232113	-0.00529601		0.0366983
11	N	5009	11018	0.225556	-0.0142295		0.0284506
11	P	3016	6912	0.218469	-0.0238847		0.0193431
11	Q	4754	10265	0.228811	-0.00979473		0.0325657
11	R	3235	7196	0.223605	-0.0168873		0.0259642
11	S	2391	3201	0.323652	0.119417		0.13866
11	T	2592	6056	0.215193	-0.028348		0.0150611
11	V	3736	8049	0.229203	-0.00926039		0.0330587
11	W	2800	5877	0.233847	-0.00293263		0.0388529
11	Y	2486	5753	0.216814	-0.0261393		0.017186
12	*	3020	6579	0.227249	-0.0119225		0.0305965
12	A	2343	1543	0.493105	0.350279		0.296126
12	C	4413	2889	0.49459	0.352302		0.297444
12	D	2238	3807	0.273578	0.0511962		0.0855004
12	E	2723	5146	0.253171	0.0233938		0.062145
12	F	2672	4249	0.287175	0.0697214		0.100461
12	G	2516	5945	0.213297	-0.0309306		0.0125619
12	H	1744	1545	0.41967	0.250232		0.230306
12	I	1697	2313	0.31974	0.114087		0.13468
12	L	3778	3669	0.397472	0.219989		0.209913
12	M	1984	1206	0.513127	0.377557		0.313904
12	N	2594	3302	0.334787	0.134587		0.149852
12	P	1935	2550	0.327113	0.124132		0.142159
12	Q	1993	965	0.569542	0.454417		0.36439
12	R	1705	189	0.852493	0.839908		0.691617
12	S	3711	2750	0.463668	0.310174		0.269934
12	T	2937	3838	0.32897	0.126662		0.144029
12	V	2901	2534	0.423108	0.254915		0.233435
12	W	3414	5082	0.300881	0.0883939		0.115117
12	Y	2527	3079	0.344601	0.147958		0.159563
13	*	3089	6607	0.230486	-0.00751192		0.0346679
13	A	3714	278	0.895384	0.898344		0.778771
13	C	3040	460	0.808934	0.780565		0.622548
13	D	2788	6583	0.213417	-0.0307673		0.0127204
13	E	4852	10715	0.224865	-0.0151708		0.0275718
13	F	3954	8115	0.237892	0.00257758		0.0438336
13	G	2811	6306	0.222139	-0.0188847		0.0240854
13	H	4429	9779	0.224898	-0.0151256		0.027614
13	I	4259	580	0.824694	0.802035		0.645936
13	K	3162	6495	0.237739	0.00236979		0.0436469
13	L	2476	6076	0.207019	-0.0394834		0.00416714
13	M	2595	4882	0.254026	0.0245587		0.0631476
13	N	3428	6658	0.248034	0.0163945		0.0560731
13	P	944	1437	0.296197	0.0820127		0.110153
13	Q	3412	7500	0.225676	-0.0140653		0.0286037
13	R	2171	4766	0.225901	-0.0137593		0.0288889
13	S	2361	2101	0.418578	0.248744		0.229311
13	T	2971	732	0.722238	0.662449		0.514343
13	W	2781	6028	0.228132	-0.0107196		0.031711
13	Y	4471	10145	0.220174	-0.0215617		0.0215535
14	*	3263	7376	0.220824	-0.0206755		0.0223934
14	A	2663	6133	0.217633	-0.0250237		0.0182548
14	C	5076	11641	0.218352	-0.0240434		0.0191917
14	D	3634	7969	0.226092	-0.0134985		0.0291318
14	F	2874	5491	0.251112	0.0205884		0.0597212
14	G	3699	8910	0.210088	-0.0353029		0.00829335
14	H	4342	10736	0.20578	-0.0411717		0.002488
14	I	2814	6714	0.211673	-0.0331437		0.0104072
14	K	4086	10177	0.20459	-0.0427928		0.00086857
14	L	4029	9670	0.210686	-0.0344878		0.00909275
14	M	2306	5109	0.224301	-0.0159384		0.0268536
14	N	3732	8027	0.229497	-0.00885927		0.0334285
14	P	2159	5062	0.214603	-0.0291518		0.014285
14	Q	2461	3871	0.289414	0.0727715		0.102882
14	R	2342	5671	0.209218	-0.0364877		0.00712844
14	S	3404	8399	0.206124	-0.0407024		0.00295545
14	T	2225	5432	0.207866	-0.0383294		0.00531058
14	V	5328	12183	0.218855	-0.0233582		0.0198452
14	W	5176	11479	0.224128	-0.0161748		0.0266322
14	Y	2069	4189	0.240365	0.00594624		0.04685
15	*	2298	5170	0.221643	-0.0195603		0.0234479
15	A	3281	83	0.962013	0.989118		1.01955
15	C	2742	88	0.952294	0.975878		0.966735
15	D	2898	693	0.72819	0.670559		0.520973
15	E	2862	634	0.743061	0.690819		0.537949
15	F	2497	325	0.831141	0.810819		0.655982
15	H	2583	462	0.781744	0.74352		0.585428
15	I	1652	15	0.986025	1.02183		1.24697
15	K	855	38	0.935126	0.952487		0.894469
15	L	2610	96	0.945704	0.966899		0.936472
15	M	3792	138	0.946247	0.967639		0.938833
15	N	3203	85	0.960224	0.986681		1.00893
15	P	2923	101	0.948824	0.97115		0.950341
15	Q	1915	138	0.898888	0.903118		0.7872
15	R	2037	125	0.912587	0.92178		0.822868
15	S	1262	145	0.847927	0.833688		0.683659
15	T	2672	134	0.927403	0.941965		0.867663
15	V	3015	25	0.987222	1.02346		1.26712
15	W	3626	280	0.89243	0.894319		0.771858
15	Y	1821	333	0.777942	0.738341		0.580513
16	*	3581	8574	0.211088	-0.0339396		0.00962939
16	A	2101	86	0.939944	0.959051		0.912737
16	D	2949	5893	0.242764	0.00921545		0.049757
16	E	4585	9273	0.240562	0.00621492		0.0470896
16	F	2472	5926	0.210884	-0.0342185		0.00935647
16	G	2729	305	0.851459	0.838501		0.689798
16	H	4004	9004	0.221722	-0.0194525		0.0235497
16	I	2011	4713	0.214674	-0.0290544		0.0143791
16	K	2631	5815	0.224721	-0.0153662		0.0273891
16	L	2514	1806	0.4714	0.320709		0.276828
16	M	2845	6091	0.230315	-0.00774551		0.0344533
16	N	3434	2761	0.443455	0.282636		0.25183
16	P	842	1389	0.279721	0.0595658		0.0923142
16	Q	1287	1543	0.348259	0.152942		0.163149
16	R	2671	5244	0.246027	0.0136603		0.0536783
16	S	2023	385	0.770972	0.728845		0.571656
16	T	3072	266	0.880934	0.878656		0.746443
16	V	3139	564	0.780969	0.742464		0.584421
16	W	2705	5785	0.230507	-0.00748393		0.0346936
16	Y	1568	3161	0.241152	0.00701938		0.0478064
17	*	2935	6858	0.215178	-0.0283684		0.0150415
17	A	3636	1434	0.618959	0.521742		0.409924
17	C	3120	1033	0.659278	0.576674		0.448754
17	D	4497	8276	0.258221	0.0302741		0.0680348
17	E	4299	5820	0.321213	0.116094		0.136181
17	F	2864	2160	0.459297	0.304219		0.26603
17	G	4079	5746	0.312612	0.104376		0.127362
17	H	2074	4221	0.239417	0.00465535		0.0456966
17	I	1952	114	0.916455	0.92705		0.833853
17	K	2853	5207	0.259817	0.0324487		0.0698807
17	L	1324	293	0.743255	0.691083		0.538173
17	N	3506	5908	0.275456	0.0537541		0.0875928
17	P	1535	2190	0.309885	0.100661		0.124539
17	Q	3797	4636	0.344134	0.147321		0.159104
17	R	3185	7161	0.221753	-0.0194108		0.0235891
17	S	3365	2089	0.507864	0.370386		0.309229
17	T	1337	187	0.820802	0.796733		0.640013
17	V	1842	87	0.931337	0.947326		0.880971
17	W	4325	9831	0.219872	-0.0219731		0.0211629
17	Y	4468	6708	0.299088	0.0859507		0.113222
18	*	2900	6277	0.228383	-0.010378		0.0320269
18	A	1888	394	0.754292	0.70612		0.551198
18	C	1102	171	0.805014	0.775224		0.616962
18	D	4525	10076	0.223424	-0.0171337		0.0257329
18	E	4151	8604	0.236103	0.000140705		0.0416382
18	F	974	2001	0.23771	0.00232952		0.0436107
18	G	3564	2582	0.469297	0.317844		0.274955
18	H	1381	3149	0.219332	-0.0227082		0.0204641
18	I	1370	76	0.920309	0.932301		0.845266
18	K	3437	8275	0.210166	-0.0351962		0.00839807
18	L	2234	129	0.917318	0.928226		0.836367
18	M	1743	587	0.655443	0.571449		0.444975
18	N	2785	4709	0.274778	0.0528314		0.086839
18	P	2024	4662	0.217609	-0.0250557		0.0182242
18	Q	5782	12011	0.235708	-0.000398415		0.041151
18	R	3032	7453	0.206742	-0.0398616		0.00379161
18	S	1818	532	0.686448	0.613689		0.476162
18	T	2551	242	0.871021	0.865151		0.726182
18	W	3993	9068	0.22003	-0.0217581		0.021367
18	Y	3956	8430	0.231147	-0.00661239		0.0354933
19	*	3381	8533	0.202449	-0.0457092		-0.00206248
19	A	2658	250	0.87198	0.866458		0.728083
19	C	2380	146	0.912613	0.921816		0.822941
19	D	3691	752	0.758712	0.712142		0.556524
19	E	1571	63	0.941091	0.960615		0.91729
19	F	3263	126	0.943151	0.963422		0.925677
19	G	1843	240	0.831069	0.810721		0.655869
19	H	1712	195	0.849045	0.835212		0.68559
19	I	1628	40	0.963064	0.990551		1.02602
19	K	3610	98	0.959348	0.985488		1.00389
19	L	2659	289	0.854954	0.843261		0.695991
19	M	3286	59	0.972738	1.00373		1.09564
19	N	3552	288	0.887656	0.887815		0.761029
19	P	2441	852	0.647323	0.560385		0.437038
19	R	1579	41	0.961048	0.987804		1.01376
19	S	2679	210	0.890981	0.892345		0.768528
19	T	1994	370	0.775409	0.73489		0.577272
19	V	2267	50	0.966718	0.995529		1.04999
19	W	2589	62	0.963966	0.99178		1.03172
19	Y	4233	220	0.924962	0.93864		0.859739
20	*	2233	5707	0.200426	-0.0484657		-0.00485421
20	A	2862	538	0.773141	0.7318		0.574391
20	C	3672	731	0.762927	0.717884		0.561665
20	D	6885	15021	0.226989	-0.012276		0.0302684
20	E	4520	8770	0.248223	0.0166531		0.0562989
20	F	3834	5756	0.299093	0.0859581		0.113228
20	G	2200	5057	0.217959	-0.0245793		0.0186798
20	H	1184	2430	0.237891	0.00257604		0.0438323
20	I	2932	214	0.897723	0.90153		0.784369
20	K	2551	5646	0.22448	-0.0156948		0.0270816
20	L	2349	1070	0.584445	0.47472		0.377944
20	M	818	377	0.581597	0.47084		0.375344
20	N	3592	8187	0.219407	-0.0226059		0.0205614
20	P	1827	3537	0.248638	0.0172181		0.0567919
20	Q	2637	6063	0.217917	-0.0246366		0.018625
20	R	4220	8900	0.232991	-0.00410013		0.0377899
20	S	2599	2430	0.406597	0.232421		0.218338
20	T	3467	909	0.709594	0.645224		0.500543
20	W	1970	3893	0.24482	0.0120166		0.0522323
20	Y	5491	11771	0.230088	-0.00805436		0.0341694
21	*	3598	8555	0.212249	-0.0323586		0.011173
21	A	2665	74	0.958458	0.984275		0.998871
21	C	2426	51	0.968228	0.997586		1.06064
21	D	3026	192	0.909884	0.918098		0.815451
21	E	2913	169	0.916961	0.92774		0.835324
21	F	2618	87	0.950686	0.973686		0.959
21	G	2577	224	0.880529	0.878105		0.745588
21	H	3252	343	0.858636	0.848278		0.702653
21	I	3063	22	0.988913	1.02577		1.299
21	K	2104	23	0.983223	1.01801		1.20578
21	L	2399	65	0.959423	0.98559		1.00431
21	M	1440	45	0.95349	0.977506		0.972646
21	N	3191	1150	0.639982	0.550385		0.429934
21	P	1128	2012	0.264255	0.0384947		0.0749744
21	Q	1508	25	0.974775	1.00651		1.11335
21	R	1471	53	0.946754	0.96833		0.941055
21	S	2021	69	0.949404	0.97194		0.953004
21	V	1677	8	0.992609	1.0308		1.38983
21	W	3629	82	0.965931	0.994457		1.04462
21	Y	3284	240	0.897605	0.901369		0.784084
22	*	2964	6861	0.216768	-0.0262011		0.0171267
22	A	1255	132	0.858975	0.84874		0.703273
22	D	1652	142	0.8817	0.8797		0.748069
22	E	2807	518	0.776366	0.736193		0.578493
22	F	2201	315	0.817397	0.792094		0.634913
22	G	2421	1719	0.474311	0.324674		0.27942
22	H	2569	643	0.719068	0.65813		0.510848
22	I	2645	59	0.966353	0.995031		1.04748
22	K	2996	736	0.722825	0.663249		0.514993
22	L	2691	146	0.921924	0.934501		0.8502
22	M	2052	100	0.929308	0.944562		0.874024
22	N	2811	493	0.785077	0.748061		0.589788
22	P	2563	5429	0.232212	-0.0051605		0.0368221
22	Q	1633	235	0.816574	0.790972		0.633691
22	R	3344	1454	0.595696	0.490049		0.388268
22	S	1983	137	0.902657	0.908252		0.796559
22	T	1282	124	0.868825	0.862159		0.721874
22	V	1820	21	0.982308	1.01677		1.19378
22	W	2072	921	0.590377	0.482802		0.383377
22	Y	2283	485	0.750974	0.701599		0.547242
23	*	2772	6734	0.208682	-0.0372174		0.0064093
23	A	2302	138	0.914432	0.924295		0.828053
23	C	1101	74	0.905049	0.91151		0.802668
23	D	3205	149	0.932342	0.948695		0.884483
23	E	2023	113	0.919802	0.931611		0.843738
23	F	3424	177	0.925334	0.939147		0.860932
23	H	2606	133	0.926214	0.940346		0.863775
23	I	1656	61	0.945628	0.966796		0.936146
23	K	4258	103	0.963615	0.991301		1.02949
23	L	2395	165	0.902903	0.908588		0.797182
23	M	3476	299	0.881625	0.879598		0.747909
23	N	2532	163	0.908689	0.91647		0.812235
23	P	2608	1117	0.599325	0.494993		0.391617
23	Q	3577	182	0.926422	0.94063		0.864452
23	R	2725	114	0.938701	0.957359		0.9079
23	S	2070	138	0.905746	0.91246		0.804475
23	T	3187	338	0.857967	0.847366		0.701431
23	V	1733	84	0.929662	0.945043		0.875221
23	W	1444	216	0.810707	0.782979		0.625102
23	Y	2096	241	0.847833	0.83356		0.683497
24	*	2439	7096	0.180461	-0.0756664		-0.0336184
24	A	1243	74	0.914974	0.925032		0.829593
24	C	2380	39	0.97506	1.00689		1.11593
24	D	1734	62	0.947138	0.968853		0.942752
24	E	2037	82	0.940879	0.960326		0.916442
24	F	1290	23	0.972923	1.00398		1.0972
24	G	2350	44	0.971604	1.00219		1.08634
24	H	915	18	0.970208	1.00028		1.07537
24	I	757	56	0.896481	0.899838		0.781383
24	K	1183	26	0.966832	0.995683		1.05077
24	L	1387	31	0.966289	0.994944		1.04704
24	M	1604	42	0.960733	0.987374		1.0119
24	N	918	8	0.98658	1.02259		1.25608
24	P	1447	78	0.922389	0.935134		0.851638
24	Q	2423	43	0.973045	1.00415		1.09823
24	R	2976	48	0.975442	1.00741		1.11945
24	S	1410	39	0.958612	0.984485		0.999734
24	V	1469	67	0.933538	0.950325		0.888727
24	W	1568	68	0.936598	0.954494		0.899914
24	Y	1716	33	0.970857	1.00117		1.08041
25	*	3058	7508	0.206936	-0.0395965		0.00405488
25	A	3686	42	0.982525	1.01706		1.19657
25	C	1929	42	0.967131	0.996091		1.05285
25	D	2766	1916	0.480479	0.333078		0.284908
25	E	4737	2130	0.587586	0.479001		0.380818
25	F	3850	27	0.989172	1.02612		1.3043
25	G	5406	144	0.960081	0.986486		1.0081
25	H	3256	1606	0.564997	0.448225		0.360281
25	I	4787	382	0.889235	0.889966		0.764565
25	K	1284	2242	0.268416	0.0441636		0.0797009
25	L	4603	77	0.974553	1.0062		1.11135
25	M	2358	9	0.994078	1.0328		1.43933
25	N	2354	202	0.881876	0.87994		0.748444
25	P	687	599	0.423551	0.255519		0.233839
25	Q	3535	229	0.908167	0.915759		0.810844
25	R	313	299	0.401426	0.225376		0.213571
25	S	2700	69	0.96164	0.98861		1.01729
25	V	5030	464	0.874133	0.869391		0.732394
25	W	5280	63	0.981716	1.01596		1.18634
25	Y	3842	22	0.991141	1.0288		1.34929
26	*	5326	12332	0.21672	-0.0262666		0.0170638
26	A	1843	34	0.97201	1.00274		1.08963
26	C	1061	82	0.892349	0.894208		0.77167
26	D	3072	1183	0.62457	0.529386		0.415219
26	E	4161	219	0.924082	0.937442		0.856942
26	F	2706	221	0.886932	0.886828		0.759422
26	G	2201	309	0.82025	0.795981		0.639181
26	H	2194	83	0.944242	0.964907		0.930232
26	I	1816	102	0.919393	0.931054		0.842511
26	K	2608	62	0.96422	0.992125		1.03334
26	L	4184	132	0.953066	0.976929		0.970534
26	M	378	35	0.87372	0.868829		0.731563
26	N	541	19	0.948029	0.970066		0.946731
26	P	2870	5648	0.24559	0.0130648		0.053155
26	Q	2734	35	0.980409	1.01418		1.17072
26	R	364	4	0.983136	1.0179		1.20461
26	S	2453	38	0.97639	1.00871		1.1284
26	V	4261	85	0.969802	0.99973		1.07227
26	W	3568	251	0.901057	0.906072		0.792547
26	Y	2557	73	0.957338	0.982749		0.992709
29	*	3570	8223	0.217609	-0.0250559		0.018224
29	A	4466	1689	0.6288	0.53515		0.419232
29	C	2270	4446	0.246473	0.0142689		0.0542125
29	D	5007	10596	0.232379	-0.00493288		0.0370301
29	E	2353	5142	0.226701	-0.0126695		0.0299029
29	F	5619	11063	0.245504	0.012948		0.0530522
29	H	4700	8858	0.253687	0.0240967		0.0627503
29	I	3582	7524	0.233713	-0.00311557		0.0386865
29	K	2710	5790	0.230681	-0.00724637		0.0349118
29	L	237	383	0.283887	0.0652416		0.096883
29	M	637	938	0.303166	0.0915071		0.117523
29	N	2918	6563	0.221692	-0.0194935		0.023511
29	P	3379	7496	0.224075	-0.0162466		0.026565
29	Q	3609	8632	0.211263	-0.033702		0.00986173
29	R	1817	3870	0.231235	-0.00649237		0.0356034
29	S	2514	4143	0.279926	0.0598442		0.0925393
29	T	3460	6884	0.243568	0.0103106		0.0507264
29	V	4256	9553	0.222041	-0.0190175		0.0239602
29	Y	3330	7370	0.224483	-0.0156909		0.0270853
30	*	3485	9142	0.196282	-0.0541118		-0.0106391
30	A	3672	238	0.908124	0.9157		0.810728
30	C	1218	48	0.94205	0.961921		0.921159
30	D	7139	15221	0.231051	-0.00674311		0.0353735
30	E	3222	7396	0.218194	-0.0242589		0.0189859
30	F	1396	276	0.76417	0.719578		0.563193
30	G	1184	2601	0.225782	-0.0139208		0.0287384
30	H	2747	6039	0.225654	-0.014095		0.028576
30	I	2695	24	0.98629	1.02219		1.25128
30	K	2884	6372	0.224781	-0.0152851		0.0274649
30	N	3722	3645	0.395469	0.21726		0.208055
30	P	2845	3940	0.316284	0.109378		0.131143
30	Q	2269	3126	0.31741	0.110913		0.132298
30	R	4206	9578	0.219558	-0.0224001		0.0207571
30	S	2234	854	0.62629	0.53173		0.416849
30	T	3091	523	0.791069	0.756225		0.597752
30	V	1459	22	0.977004	1.00954		1.13439
30	W	1279	2627	0.237751	0.00238557		0.0436611
30	Y	4130	9542	0.217089	-0.0257642		0.0175457
31	*	952	2280	0.211043	-0.0340016		0.00956871
31	A	230	390	0.274213	0.0520609		0.0862087
31	C	1876	3933	0.234056	-0.00264785		0.0391118
31	E	656	1463	0.223156	-0.0174987		0.02539
31	F	511	39	0.89355	0.895844		0.774458
31	G	263	741	0.185257	-0.0691328		-0.0264944
31	H	1065	226	0.751179	0.701879		0.547485
31	I	285	776	0.190472	-0.0620278		-0.0189074
31	K	526	1155	0.22586	-0.0138153		0.0288367
31	L	383	641	0.276822	0.055616		0.0891103
31	M	1364	2116	0.292269	0.0766602		0.105954
31	N	917	1894	0.236742	0.00101115		0.0424237
31	P	1259	2122	0.275414	0.0536971		0.0875462
31	Q	173	417	0.209974	-0.0354573		0.00814178
31	R	775	1595	0.237388	0.00189153		0.0432167
31	S	1046	2414	0.217278	-0.0255061		0.0177929
31	T	814	2154	0.194911	-0.0559789		-0.0125724
31	V	1524	3014	0.244675	0.0118194		0.0520585
31	Y	482	32	0.9061	0.912943		0.805398
32	*	368	1131	0.172493	-0.0865216		-0.0457884
32	A	644	24	0.945026	0.965976		0.933562
32	C	1107	58	0.924399	0.937874		0.857947
32	D	921	2290	0.20487	-0.042412		0.0012496
32	E	614	1403	0.218973	-0.0231969		0.0199988
32	F	157	171	0.370353	0.183042		0.184456
32	G	3026	6198	0.238255	0.00307219		0.0442779
32	H	181	421	0.215951	-0.027315		0.0160564
32	I	394	7	0.973016	1.00411		1.09798
32	K	521	1118	0.229908	-0.00830001		0.0339434
32	M	1596	70	0.935925	0.953576		0.897409
32	N	1251	2416	0.249093	0.0178379		0.057332
32	P	518	1143	0.225007	-0.0149767		0.0277532
32	Q	206	256	0.340159	0.141906		0.155184
32	R	390	1002	0.199585	-0.0496121		-0.00602147
32	S	1097	1842	0.276166	0.0547226		0.0883827
32	W	861	1707	0.24422	0.0111982		0.0515106
32	Y	534	896	0.276312	0.0549209		0.0885443
33	*	1065	2501	0.214333	-0.0295189		0.01393
33	A	957	13	0.979236	1.01258		1.15756
33	C	830	18	0.967257	0.996263		1.05373
33	E	1442	38	0.960491	0.987045		1.01048
33	F	644	3	0.992781	1.03104		1.3951
33	G	2636	84	0.952615	0.976315		0.96831
33	H	672	2	0.995376	1.03457		1.49454
33	I	183	0	1	1.04087		nan
33	K	1957	35	0.972842	1.00387		1.09651
33	L	1024	3	0.995448	1.03467		1.49804
33	M	1040	7	0.989603	1.02671		1.31342
33	N	808	12	0.977343	1.01		1.13776
33	P	510	1242	0.208275	-0.037772		0.00586168
33	Q	908	36	0.94172	0.961471		0.919819
33	R	509	0	1	1.04087		nan
33	S	387	4	0.984122	1.01924		1.21821
33	T	1292	15	0.9822	1.01662		1.19241
33	V	1066	7	0.989854	1.02705		1.3189
33	W	940	11	0.982061	1.01643		1.19066
33	Y	1370	15	0.983197	1.01798		1.20543
34	*	867	1858	0.230143	-0.00797917		0.0342385
34	A	1114	15	0.979415	1.01283		1.15951
34	C	1097	16	0.97774	1.01055		1.14178
34	D	296	2	0.989563	1.02665		1.31256
34	E	897	15	0.974561	1.00621		1.11143
34	F	965	6	0.990388	1.02778		1.33102
34	G	1077	6	0.991379	1.02913		1.35539
34	H	1420	31	0.967046	0.995976		1.05226
34	I	2268	498	0.744743	0.69311		0.539908
34	K	1150	5	0.993259	1.03169		1.41041
34	L	1999	36	0.972658	1.00362		1.09497
34	M	986	14	0.978317	1.01133		1.14774
34	N	448	11	0.963088	0.990583		1.02617
34	P	686	1048	0.295453	0.0809983		0.10936
34	Q	1248	11	0.986428	1.02238		1.25356
34	R	1582	8	0.992168	1.0302		1.37688
34	S	1207	43	0.94732	0.969101		0.94356
34	T	1431	27	0.971391	1.0019		1.08463
34	V	2319	75	0.951943	0.975399		0.965025
34	W	1497	7	0.992754	1.031		1.39426
34	Y	627	10	0.975709	1.00778		1.12194
35	*	1941	4125	0.231627	-0.00595803		0.0360928
35	A	2462	77	0.953453	0.977457		0.972465
35	C	1542	40	0.961085	0.987854		1.01398
35	D	814	36	0.935424	0.952894		0.895563
35	F	895	29	0.951857	0.975282		0.964609
35	G	1847	59	0.952506	0.976166		0.967773
35	H	1238	67	0.922103	0.934746		0.850754
35	I	242	7	0.9568	0.982016		0.989801
35	K	2220	50	0.966038	0.994602		1.04534
35	L	1503	49	0.951575	0.974898		0.963249
35	M	1590	26	0.975111	1.00696		1.1164
35	N	826	20	0.963581	0.991255		1.02927
35	Q	903	32	0.947584	0.96946		0.944735
35	R	1620	38	0.964679	0.99275		1.03632
35	S	2614	104	0.941528	0.96121		0.919046
35	T	1339	41	0.954385	0.978726		0.977167
35	W	992	19	0.970971	1.00132		1.0813
35	Y	839	12	0.978162	1.01112		1.14612
36	*	903	1716	0.252124	0.0219678		0.0609147
36	A	1853	504	0.701971	0.634837		0.492394
36	C	2724	301	0.852891	0.840451		0.692321
36	D	1159	2810	0.209009	-0.0367731		0.00684729
36	E	1725	3390	0.245847	0.0134149		0.0534628
36	F	1783	4000	0.222132	-0.0188931		0.0240775
36	G	2661	5456	0.238068	0.00281786		0.0440495
36	H	3117	6712	0.229292	-0.00913849		0.0331711
36	I	1538	94	0.912907	0.922217		0.823761
36	K	1209	2901	0.210727	-0.0344315		0.00914783
36	L	1696	297	0.785331	0.748408		0.590123
36	M	603	659	0.369563	0.181966		0.183704
36	N	824	2049	0.204855	-0.0424319		0.00122972
36	P	1152	2132	0.257148	0.0288117		0.0667893
36	Q	1280	2908	0.219961	-0.0218508		0.021279
36	R	1872	3701	0.244737	0.0119035		0.0521327
36	S	1708	3641	0.23108	-0.00670243		0.0354108
36	T	1570	395	0.71802	0.656703		0.509698
36	W	961	2195	0.219044	-0.0231013		0.0200899
36	Y	1370	3217	0.214346	-0.0295011		0.0139472
37	*	483	836	0.270143	0.0465163		0.0816488
37	A	1397	100	0.899495	0.903944		0.788686
37	C	135	6	0.935126	0.952487		0.894469
37	D	1543	1265	0.438653	0.276095		0.247507
37	E	1445	47	0.951682	0.975044		0.963763
37	F	1016	33	0.951747	0.975132		0.964075
37	G	713	557	0.45057	0.292329		0.258219
37	H	548	14	0.961651	0.988626		1.01737
37	I	823	19	0.965217	0.993484		1.03985
37	K	1024	154	0.80988	0.781854		0.623909
37	L	790	24	0.954726	0.979191		0.978914
37	M	697	33	0.931182	0.947115		0.880433
37	N	1391	175	0.835855	0.817242		0.663522
37	P	716	1348	0.253888	0.0243706		0.0629858
37	Q	754	150	0.76305	0.718051		0.561815
37	R	673	74	0.853509	0.841293		0.693416
37	S	583	21	0.946767	0.968348		0.941113
37	T	1104	10	0.986058	1.02188		1.24751
37	V	511	4	0.987929	1.02443		1.2799
37	W	1364	11	0.987568	1.02394		1.27329
38	*	1051	2584	0.206708	-0.0399068		0.0037467
38	A	722	27	0.944847	0.965731		0.932795
38	D	379	853	0.221575	-0.0196519		0.0233614
38	E	867	1691	0.247252	0.0153299		0.0551422
38	F	544	65	0.842809	0.826715		0.674968
38	G	396	130	0.661188	0.579276		0.450644
38	H	201	178	0.419759	0.250352		0.230387
38	I	1197	184	0.806488	0.777232		0.619053
38	K	741	1377	0.256365	0.0277455		0.0658791
38	L	560	26	0.932425	0.948808		0.884775
38	M	651	43	0.906533	0.913533		0.80653
38	N	452	375	0.435725	0.272105		0.244866
38	Q	665	753	0.361338	0.17076		0.175831
38	R	475	1014	0.23083	-0.00704316		0.0350983
38	V	1153	72	0.911183	0.919868		0.818992
38	W	1069	1843	0.270921	0.0475759		0.0825235
38	Y	360	839	0.215617	-0.0277694		0.0156189
39	*	869	2527	0.180535	-0.0755661		-0.0335078
39	A	257	418	0.282582	0.063463		0.0954557
39	C	813	78	0.869749	0.863418		0.723678
39	D	2548	4976	0.247014	0.0150051		0.0548578
39	E	816	1578	0.248845	0.0174993		0.057037
39	F	967	2094	0.228303	-0.0104864		0.0319267
39	G	569	1141	0.242125	0.00834446		0.0489844
39	H	2542	6096	0.210824	-0.0343		0.00927663
39	I	1637	2762	0.275204	0.0534121		0.0873135
39	K	1270	2454	0.248993	0.0177022		0.0572139
39	L	3065	6835	0.223169	-0.0174811		0.0254066
39	M	1698	4148	0.207763	-0.0384696		0.00517192
39	N	448	761	0.27386	0.0515805		0.0858153
39	Q	701	1868	0.193816	-0.057471		-0.0141248
39	R	2796	6057	0.228234	-0.0105804		0.0318397
39	S	2045	2740	0.323475	0.119176		0.13848
39	T	1165	1782	0.295192	0.0806427		0.109081
39	V	1570	2439	0.291978	0.076264		0.105642
39	W	1441	3034	0.233289	-0.00369297		0.038161
39	Y	1973	3746	0.252293	0.0221979		0.0611134
40	*	2626	5708	0.227639	-0.0113913		0.031089
40	A	1872	4245	0.220283	-0.0214132		0.0216943
40	C	4917	11422	0.21617	-0.0270166		0.0163434
40	D	4058	9841	0.208969	-0.0368272		0.00679398
40	E	3236	7015	0.228113	-0.0107455		0.031687
40	F	2733	6658	0.208217	-0.0378511		0.00578362
40	G	5691	12816	0.221475	-0.0197894		0.0232315
40	H	3485	7893	0.220493	-0.0211262		0.0219664
40	I	2220	5236	0.213604	-0.0305121		0.0129679
40	K	3202	6234	0.247586	0.0157849		0.0555403
40	L	3464	7944	0.218355	-0.0240395		0.0191954
40	M	2110	4392	0.235343	-0.000894788		0.0407018
40	N	2720	6163	0.220421	-0.0212254		0.0218724
40	P	1616	3305	0.238528	0.00344386		0.0446114
40	Q	2432	5398	0.223984	-0.0163709		0.0264485
40	S	3108	7245	0.215579	-0.0278213		0.0155689
40	T	2076	5575	0.192611	-0.0591134		-0.0158413
40	V	4405	10575	0.210646	-0.0345427		0.00903895
40	W	4059	9612	0.212929	-0.0314322		0.0120746
40	Y	1709	3779	0.224639	-0.0154787		0.0272838
41	*	1584	3690	0.215691	-0.0276695		0.0157151
41	A	2838	6659	0.214476	-0.0293247		0.0141178
41	C	2970	7369	0.205216	-0.0419396		0.00172169
41	D	4219	9431	0.222754	-0.0180464		0.024875
41	E	4031	9665	0.210855	-0.0342581		0.00931769
41	F	3273	8090	0.205837	-0.0410947		0.00256474
41	G	2915	6563	0.221514	-0.0197353		0.0232827
41	I	2707	7035	0.197762	-0.0520956		-0.00856286
41	K	1627	4161	0.200319	-0.048612		-0.00500294
41	L	2856	6443	0.221171	-0.0202035		0.02284
41	M	3337	7082	0.231872	-0.00562364		0.0363987
41	N	3307	8101	0.207308	-0.0390904		0.00455692
41	P	3439	8267	0.210423	-0.0348458		0.00874187
41	Q	2120	4438	0.234321	-0.00228796		0.0394387
41	R	2164	4912	0.220113	-0.0216445		0.0214749
41	S	3557	8704	0.207485	-0.0388484		0.00479682
41	T	1850	4224	0.219106	-0.023016		0.0201711
41	V	2004	4536	0.220598	-0.0209838		0.0221014
41	W	4559	9378	0.237479	0.00201555		0.0433283
41	Y	3153	8615	0.189935	-0.0627595		-0.0196813
42	*	2470	5877	0.212133	-0.0325158		0.0110197
42	A	2563	462	0.780414	0.741709		0.583702
42	C	3486	1108	0.66839	0.589087		0.457817
42	D	4558	10765	0.213375	-0.0308245		0.0126648
42	E	2226	5524	0.205188	-0.0419787		0.00168265
42	F	3366	5295	0.289395	0.0727455		0.102862
42	G	3308	2012	0.512979	0.377356		0.313773
42	H	3647	8879	0.208322	-0.0377084		0.00592461
42	I	1872	442	0.730698	0.673976		0.523794
42	K	2192	4332	0.244808	0.0119994		0.0522172
42	L	2883	473	0.796118	0.763104		0.604593
42	M	2725	3709	0.320042	0.114499		0.134988
42	N	3934	7400	0.254054	0.0245962		0.0631798
42	P	4432	10031	0.22061	-0.0209672		0.0221171
42	Q	3753	7594	0.240473	0.00609395		0.0469817
42	R	2923	6354	0.227627	-0.0114074		0.0310741
42	S	2437	1129	0.580335	0.469122		0.374193
42	T	3674	2461	0.488859	0.344494		0.292354
42	W	3487	7980	0.218713	-0.0235517		0.0196607
42	Y	2196	4618	0.233508	-0.00339548		0.0384318
43	*	3890	7568	0.247721	0.0159684		0.0557008
43	A	2631	280	0.857545	0.846791		0.700663
43	C	2170	118	0.921761	0.934279		0.849697
43	D	3226	6116	0.25257	0.0225753		0.0614392
43	E	4974	6450	0.330673	0.128983		0.145739
43	F	3383	369	0.854512	0.842659		0.695201
43	G	2811	963	0.651572	0.566175		0.44118
43	H	769	997	0.330717	0.129042		0.145783
43	K	2756	3775	0.318667	0.112625		0.133584
43	L	5410	232	0.937261	0.955397		0.902404
43	M	2234	112	0.927423	0.941993		0.867732
43	N	3575	3280	0.411162	0.23864		0.22253
43	P	1640	3872	0.213432	-0.0307464		0.0127406
43	Q	2849	1450	0.557277	0.437707		0.353323
43	R	3993	5549	0.315537	0.108361		0.130376
43	S	2580	718	0.697156	0.628277		0.48731
43	T	2437	178	0.897657	0.90144		0.784208
43	V	3187	97	0.954646	0.979082		0.978503
43	W	4315	5276	0.343811	0.146882		0.158787
43	Y	1814	923	0.55734	0.437793		0.35338
44	*	3380	7830	0.216637	-0.0263799		0.0169551
44	A	1875	222	0.844014	0.828357		0.676993
44	D	3988	3090	0.452601	0.295097		0.260039
44	E	4282	5372	0.338035	0.139012		0.15308
44	F	2814	2968	0.377878	0.193294		0.191589
44	G	2517	427	0.790634	0.755633		0.597168
44	H	3411	3408	0.390692	0.210752		0.20361
44	I	2136	205	0.86971	0.863365		0.723602
44	K	5489	6724	0.34339	0.146308		0.158372
44	L	2262	52	0.965359	0.993678		1.04079
44	M	3073	913	0.683172	0.609226		0.472794
44	N	853	396	0.579826	0.468428		0.37373
44	P	4068	5085	0.338849	0.140121		0.153888
44	Q	2108	1954	0.40868	0.235259		0.220253
44	R	1950	2811	0.307678	0.0976543		0.122244
44	S	1240	337	0.702138	0.635065		0.492572
44	T	1648	261	0.801789	0.770829		0.612429
44	V	2073	256	0.838389	0.820693		0.667646
44	W	3238	3228	0.391219	0.21147		0.204101
44	Y	2864	3359	0.353267	0.159764		0.16803
45	*	4543	10221	0.221639	-0.0195658		0.0234427
45	A	3158	51	0.975412	1.00737		1.11916
45	C	2920	35	0.981634	1.01585		1.18533
45	D	2942	69	0.964684	0.992757		1.03635
45	E	3273	102	0.953611	0.977672		0.973257
45	F	2024	82	0.940522	0.959839		0.915021
45	G	1925	50	0.961036	0.987787		1.01369
45	H	2527	54	0.967721	0.996895		1.057
45	I	3941	143	0.946397	0.967844		0.939488
45	K	1838	21	0.982478	1.017		1.19597
45	L	2582	72	0.958288	0.984044		0.99793
45	M	1535	45	0.956242	0.981256		0.986826
45	N	3515	40	0.982547	1.01709		1.19686
45	P	3510	573	0.796927	0.764206		0.605702
45	Q	3499	91	0.960988	0.987722		1.0134
45	R	2780	46	0.974822	1.00657		1.11377
45	S	1800	32	0.972999	1.00409		1.09784
45	V	2576	91	0.94774	0.969673		0.945434
45	W	4409	553	0.836274	0.817812		0.6642
45	Y	1834	82	0.934762	0.951992		0.893142
46	*	2705	6098	0.221294	-0.0200361		0.0229984
46	C	1682	55	0.951437	0.97471		0.962584
46	D	1548	174	0.850735	0.837514		0.68853
46	E	1529	47	0.954215	0.978495		0.976305
46	F	1762	38	0.967433	0.996502		1.05496
46	G	1406	46	0.951412	0.974676		0.962464
46	H	2780	62	0.966359	0.995039		1.04752
46	I	1088	23	0.968056	0.997352		1.0594
46	K	1980	61	0.954117	0.978361		0.975807
46	L	1824	31	0.974157	1.00566		1.10783
46	M	2725	52	0.971075	1.00146		1.08212
46	N	1968	84	0.937536	0.955772		0.903445
46	P	944	42	0.935061	0.9524		0.894234
46	Q	1972	63	0.952501	0.976159		0.967748
46	R	1905	43	0.965965	0.994503		1.04485
46	T	1276	52	0.940193	0.959391		0.913718
46	V	1874	45	0.963872	0.991651		1.03112
46	W	1935	25	0.980232	1.01394		1.16869
46	Y	1639	44	0.959781	0.986078		1.00636
47	*	1427	3876	0.190847	-0.0615161		-0.0183671
47	A	874	24	0.958899	0.984875		1.00134
47	C	1732	77	0.935108	0.952464		0.894405
47	D	527	4	0.988291	1.02492		1.28675
47	F	2619	56	0.967702	0.996869		1.05687
47	G	1587	37	0.964886	0.993032		1.03767
47	H	1646	43	0.96082	0.987493		1.01241
47	I	823	26	0.953005	0.976846		0.970232
47	K	2895	62	0.967652	0.996801		1.05652
47	L	1887	53	0.958	0.983651		0.996332
47	M	2017	58	0.957043	0.982347		0.991109
47	N	723	18	0.962592	0.989908		1.0231
47	P	2499	249	0.865403	0.857497		0.715282
47	Q	2281	60	0.96056	0.987139		1.01089
47	R	1898	180	0.871054	0.865197		0.726247
47	S	3161	111	0.948035	0.970075		0.946761
47	T	1792	89	0.928053	0.942852		0.869818
47	V	2418	65	0.959729	0.986007		1.00607
47	W	700	48	0.903313	0.909146		0.798222
47	Y	544	8	0.97756	1.0103		1.13995
48	*	1035	2223	0.229747	-0.00851937		0.0337415
48	A	1006	110	0.854205	0.842241		0.694654
48	C	464	45	0.86852	0.861744		0.721281
48	E	326	4	0.981207	1.01527		1.18014
48	F	1305	355	0.70194	0.634796		0.492362
48	G	868	140	0.798873	0.766857		0.608379
48	H	776	39	0.927258	0.941768		0.867186
48	I	1426	359	0.71789	0.656526		0.509556
48	K	471	95	0.76055	0.714645		0.558758
48	L	856	223	0.710911	0.647018		0.501964
48	M	1059	253	0.728377	0.670814		0.521183
48	N	1539	48	0.953576	0.977624		0.973079
48	P	737	511	0.480244	0.332757		0.284698
48	Q	903	35	0.94295	0.963147		0.924846
48	R	676	229	0.654117	0.569642		0.443673
48	S	926	95	0.861966	0.852814		0.708801
48	T	542	57	0.85899	0.848761		0.703301
48	V	1224	105	0.881909	0.879985		0.748514
48	W	234	134	0.52802	0.397847		0.32715
48	Y	1234	277	0.740528	0.687368		0.535013
49	*	2761	5909	0.23038	-0.00765722		0.0345344
49	A	2143	220	0.861887	0.852707		0.708654
49	C	2590	122	0.931509	0.94756		0.881569
49	D	2890	1683	0.52383	0.392139		0.32342
49	E	2522	916	0.638187	0.547939		0.428207
49	F	1802	240	0.827887	0.806386		0.650875
49	G	1810	1374	0.45768	0.302017		0.264585
49	H	2416	511	0.751796	0.702719		0.548219
49	I	3698	615	0.793907	0.760092		0.601582
49	K	1238	143	0.847241	0.832753		0.68248
49	L	1336	10	0.988451	1.02514		1.28984
49	N	2252	513	0.737693	0.683506		0.53175
49	P	901	646	0.471885	0.321369		0.27726
49	Q	2992	267	0.877736	0.8743		0.739753
49	R	2729	483	0.783535	0.745961		0.587765
49	S	1839	467	0.716134	0.654133		0.507634
49	T	2255	129	0.918025	0.929189		0.838443
49	V	3261	35	0.983523	1.01842		1.20985
49	W	3981	2480	0.506997	0.369205		0.30846
49	Y	2686	904	0.655588	0.571646		0.445117
50	*	2709	6393	0.213508	-0.0306433		0.0128407
50	A	1279	8	0.990331	1.0277		1.32969
50	C	1935	7	0.994385	1.03322		1.45122
50	D	3518	16	0.992951	1.03127		1.40042
50	E	2175	14	0.990053	1.02732		1.32333
50	F	1944	12	0.990457	1.02787		1.33262
50	G	2482	8	0.994994	1.03405		1.47684
50	H	2379	10	0.993481	1.03199		1.41791
50	I	3314	64	0.970737	1.001		1.07947
50	K	2527	15	0.99082	1.02836		1.34131
50	M	1866	21	0.982736	1.01735		1.19933
50	N	1867	14	0.98843	1.02511		1.28944
50	P	2272	11	0.992499	1.03065		1.38654
50	Q	1598	9	0.991285	1.029		1.35297
50	R	2803	14	0.992264	1.03033		1.37963
50	S	2314	11	0.992634	1.03084		1.39061
50	T	3245	19	0.990943	1.02853		1.34435
50	V	2844	32	0.98274	1.01736		1.19937
50	W	2144	27	0.980722	1.01461		1.17437
50	Y	2826	64	0.965857	0.994355		1.04411
51	*	4656	11431	0.206942	-0.0395885		0.00406281
51	A	946	46	0.929453	0.944759		0.874513
51	C	2347	48	0.969064	0.998725		1.06674
51	D	3610	124	0.949112	0.971542		0.951659
51	E	2537	88	0.948637	0.970896		0.949488
51	F	3259	218	0.905458	0.912068		0.803727
51	G	2897	336	0.846711	0.832031		0.681573
51	H	2015	64	0.952764	0.976517		0.96904
51	I	2408	251	0.860063	0.850222		0.705273
51	K	3504	129	0.945657	0.966835		0.93627
51	L	4109	428	0.860149	0.850339		0.705431
51	M	2238	85	0.944033	0.964623		0.929354
51	P	4947	6317	0.334089	0.133636		0.149156
51	Q	3151	125	0.941689	0.961429		0.919693
51	R	2151	70	0.951658	0.975011		0.963647
51	S	3450	163	0.931317	0.947298		0.8809
51	T	3766	208	0.920631	0.932739		0.846242
51	V	3262	360	0.853048	0.840664		0.692598
51	W	3044	111	0.946146	0.967501		0.93839
51	Y	3234	123	0.943959	0.964522		0.929044
52	*	2720	5516	0.240068	0.00554232		0.0464894
52	A	3199	891	0.696981	0.62804		0.487126
52	C	1844	675	0.636382	0.545479		0.426473
52	D	4159	1288	0.674124	0.5969		0.463585
52	E	3892	1629	0.60484	0.502506		0.396726
52	F	2879	1237	0.59856	0.493951		0.390911
52	G	3726	651	0.785716	0.748932		0.59063
52	H	2734	1144	0.604906	0.502597		0.396788
52	I	3294	1041	0.669657	0.590814		0.459087
52	K	2441	1192	0.567459	0.451579		0.362505
52	L	2992	844	0.694291	0.624375		0.484306
52	M	2026	450	0.742554	0.690128		0.537359
52	N	5098	2583	0.558385	0.439217		0.35432
52	Q	2684	787	0.686014	0.613098		0.475715
52	R	2884	2111	0.466732	0.314349		0.272668
52	S	1490	489	0.661253	0.579364		0.450708
52	T	3252	892	0.700205	0.632432		0.490524
52	V	2614	1200	0.582556	0.472147		0.376219
52	W	4589	1353	0.684829	0.611483		0.474495
52	Y	2740	1258	0.582525	0.472106		0.376191
53	*	1518	3131	0.236992	0.00135101		0.04273
53	A	811	28	0.948864	0.971204		0.950523
53	C	1960	62	0.952947	0.976767		0.969944
53	D	2698	72	0.96001	0.98639		1.00768
53	E	1752	21	0.981634	1.01585		1.18533
53	F	3657	145	0.941716	0.961466		0.919805
53	G	3613	457	0.835116	0.816234		0.662327
53	H	2765	71	0.961463	0.988369		1.01623
53	I	2532	82	0.951881	0.975315		0.964724
53	K	1699	49	0.956921	0.982181		0.990455
53	L	3125	101	0.951973	0.975441		0.965173
53	M	1313	41	0.953523	0.977552		0.972815
53	P	2445	57	0.964888	0.993035		1.03768
53	Q	1833	44	0.963884	0.991668		1.03119
53	R	1640	47	0.957181	0.982536		0.99186
53	S	2657	93	0.948195	0.970293		0.94748
53	T	2936	108	0.945699	0.966893		0.936453
53	V	1544	103	0.905691	0.912385		0.804331
53	W	2817	152	0.922318	0.935038		0.851417
53	Y	1429	77	0.922416	0.935172		0.851723
54	*	3102	6876	0.224214	-0.0160571		0.0267425
54	A	3803	6525	0.271874	0.0488745		0.0835934
54	C	4394	7134	0.282941	0.0639529		0.0958493
54	D	3943	6204	0.289351	0.0726854		0.102814
54	E	4538	7954	0.26767	0.0431478		0.0788574
54	F	2633	527	0.761949	0.716551		0.560466
54	G	3184	4796	0.2984	0.0850134		0.112493
54	H	3489	2359	0.486526	0.341316		0.290282
54	I	3494	5218	0.300199	0.087464		0.114397
54	K	2426	4561	0.254153	0.0247318		0.0632964
54	L	4921	7027	0.309698	0.100405		0.124345
54	M	2842	2568	0.414861	0.24368		0.225917
54	N	3374	5458	0.283682	0.0649623		0.0966592
54	P	2751	4154	0.297884	0.0843112		0.111946
54	Q	4470	7454	0.27755	0.0566075		0.0899165
54	R	4177	7943	0.251998	0.021796		0.0607662
54	S	1807	3212	0.264928	0.0394112		0.0757418
54	T	3229	5535	0.272058	0.0491258		0.0838002
54	V	3683	6712	0.260099	0.0328323		0.0702055
54	W	3744	859	0.736306	0.681616		0.530161
55	*	3746	8518	0.219809	-0.0220582		0.021082
55	A	3901	108	0.958575	0.984435		0.999529
55	C	2943	82	0.958321	0.984088		0.99811
55	D	4211	80	0.9712	1.00163		1.08311
55	F	3315	123	0.945254	0.966286		0.934535
55	G	2272	93	0.939943	0.959051		0.912736
55	H	2836	50	0.973217	1.00438		1.09969
55	I	2884	69	0.963999	0.991824		1.03193
55	K	1173	27	0.965317	0.993619		1.04051
55	L	3233	150	0.932469	0.948868		0.884929
55	M	2170	51	0.964613	0.99266		1.03588
55	N	2473	73	0.955953	0.980862		0.985295
55	P	2307	65	0.957873	0.983478		0.995636
55	Q	3590	105	0.956339	0.981389		0.987341
55	R	3104	63	0.969292	0.999035		1.06844
55	S	3007	111	0.945519	0.966647		0.935675
55	T	2343	52	0.966517	0.995255		1.0486
55	V	4691	110	0.96469	0.992765		1.03639
55	W	1923	22	0.982455	1.01697		1.19568
55	Y	3123	48	0.976571	1.00895		1.13015
56	*	3980	10213	0.199781	-0.049345		-0.00574914
56	A	2865	49	0.973998	1.00545		1.10643
56	C	3045	52	0.974036	1.0055		1.10677
56	E	2704	51	0.971401	1.00191		1.08472
56	F	1664	13	0.987952	1.02446		1.28034
56	G	2283	40	0.973379	1.0046		1.10107
56	H	3498	102	0.956465	0.98156		0.988013
56	I	2431	37	0.976794	1.00926		1.13232
56	K	2213	27	0.981312	1.01541		1.1814
56	L	3369	69	0.969021	0.998666		1.06643
56	M	1884	23	0.9813	1.0154		1.18126
56	N	2093	44	0.968228	0.997586		1.06063
56	P	3504	474	0.825659	0.80335		0.647422
56	Q	3299	65	0.970163	1.00022		1.07502
56	R	2782	133	0.930558	0.946264		0.87828
56	S	2949	169	0.917891	0.929007		0.83805
56	T	1041	21	0.969473	0.999282		1.06979
56	V	3568	647	0.779392	0.740317		0.582381
56	W	1848	12	0.989966	1.0272		1.32138
56	Y	3618	54	0.977233	1.00985		1.13666
57	*	4061	8488	0.234601	-0.00190561		0.0397857
57	A	5134	714	0.821636	0.797869		0.641275
57	C	3092	326	0.858683	0.848341		0.702737
57	D	3748	802	0.749619	0.699754		0.545637
57	E	2161	294	0.824836	0.802229		0.646155
57	F	3871	981	0.71655	0.6547		0.508089
57	G	3391	1118	0.660225	0.577964		0.44969
57	H	1992	713	0.641557	0.55253		0.431452
57	I	3005	102	0.949682	0.972319		0.954296
57	K	2261	653	0.689268	0.617532		0.479077
57	M	4083	192	0.931618	0.947708		0.881946
57	N	2032	314	0.805667	0.776113		0.617886
57	P	2036	2212	0.370938	0.183839		0.185013
57	Q	3474	428	0.838709	0.821129		0.668171
57	R	3931	1567	0.616435	0.518304		0.407552
57	S	1862	223	0.8425	0.826294		0.674451
57	T	3654	371	0.863196	0.85449		0.711105
57	V	1937	233	0.841918	0.825502		0.67348
57	W	6165	3417	0.536147	0.408919		0.334395
57	Y	3509	784	0.741426	0.688591		0.536051
58	*	4110	8652	0.233321	-0.00364982		0.0382003
58	A	3268	218	0.905694	0.912389		0.804339
58	C	3035	223	0.897109	0.900694		0.782889
58	D	3511	1225	0.64741	0.560504		0.437123
58	E	1887	238	0.835509	0.81677		0.662963
58	F	1924	28	0.977788	1.01061		1.14227
58	G	4627	1530	0.659565	0.577064		0.449037
58	H	1621	61	0.944519	0.965285		0.931404
58	I	2245	46	0.969008	0.998648		1.06633
58	K	3719	736	0.763993	0.719336		0.562974
58	M	3667	169	0.932889	0.949441		0.886416
58	N	2224	140	0.910531	0.918979		0.817208
58	P	2807	3247	0.356428	0.164071		0.171095
58	Q	2246	168	0.89545	0.898433		0.778926
58	R	1897	197	0.860511	0.850832		0.7061
58	S	1893	126	0.905881	0.912645		0.804827
58	T	2610	328	0.836006	0.817447		0.663766
58	V	2086	98	0.931678	0.94779		0.882155
58	W	4796	113	0.964527	0.992544		1.03533
58	Y	3295	119	0.946635	0.968167		0.94053
59	*	2673	5528	0.23651	0.000694713		0.0421383
59	A	1506	27	0.972777	1.00378		1.09597
59	C	5328	89	0.974588	1.00625		1.11167
59	D	1930	54	0.958154	0.983861		0.997184
59	E	4054	119	0.956188	0.981183		0.98654
59	F	888	19	0.967681	0.996841		1.05672
59	G	5153	162	0.953223	0.977143		0.971314
59	H	1179	24	0.969204	0.998915		1.06778
59	K	2225	42	0.971378	1.00188		1.08453
59	L	4978	119	0.964028	0.991864		1.03211
59	M	3891	95	0.963288	0.990856		1.02743
59	N	3408	107	0.953281	0.977223		0.971606
59	P	1532	173	0.850147	0.836712		0.687503
59	Q	1770	69	0.94264	0.962725		0.92357
59	R	2539	66	0.961006	0.987747		1.01351
59	S	2180	52	0.964103	0.991966		1.0326
59	T	2951	102	0.948809	0.971129		0.950271
59	V	4673	80	0.973973	1.00541		1.10622
59	W	3714	143	0.943307	0.963633		0.926321
59	Y	3415	95	0.958384	0.984175		0.998463
60	*	2329	4421	0.252332	0.022251		0.0611592
60	A	2716	134	0.928495	0.943453		0.871289
60	C	1320	17	0.980293	1.01402		1.16939
60	D	3540	103	0.956556	0.981684		0.988497
60	E	2391	68	0.957494	0.982962		0.993559
60	F	4272	106	0.962713	0.990072		1.02384
60	G	1632	50	0.95436	0.978692		0.977041
60	H	2049	63	0.954204	0.97848		0.976249
60	I	2109	59	0.958159	0.983868		0.997215
60	K	1677	37	0.966707	0.995514		1.04991
60	L	3340	153	0.933268	0.949956		0.88776
60	M	3964	118	0.955597	0.980378		0.98343
60	N	3211	114	0.947492	0.969335		0.944325
60	P	5386	126	0.96477	0.992875		1.03691
60	Q	2043	43	0.968191	0.997536		1.06037
60	S	4156	96	0.965199	0.993459		1.03973
60	T	1879	32	0.974105	1.00559		1.10738
60	V	3092	77	0.962583	0.989894		1.02304
60	W	2978	57	0.97099	1.00135		1.08145
60	Y	1854	57	0.954208	0.978485		0.976267
61	*	3214	7817	0.208487	-0.0374837		0.00614644
61	A	4816	264	0.921178	0.933485		0.847911
61	C	4143	137	0.950917	0.974001		0.960096
61	D	4136	1454	0.645685	0.558154		0.435447
61	E	1492	243	0.797304	0.764719		0.606218
61	F	2233	130	0.916696	0.927379		0.834553
61	G	3372	488	0.815727	0.789819		0.632438
61	H	2879	203	0.90085	0.90579		0.792033
61	I	3210	126	0.942267	0.962217		0.922042
61	L	5163	141	0.959114	0.985169		1.00256
61	M	3221	121	0.94461	0.965409		0.931789
61	N	4313	266	0.912185	0.921233		0.821752
61	P	5469	1904	0.647907	0.561182		0.437606
61	Q	3572	98	0.958933	0.984923		1.00154
61	R	2488	93	0.94487	0.965763		0.932894
61	S	2823	152	0.92247	0.935245		0.85189
61	T	2344	74	0.953036	0.976888		0.970385
61	V	3204	86	0.959787	0.986086		1.0064
61	W	2321	105	0.934042	0.951011		0.890536
61	Y	2477	162	0.907369	0.914671		0.808727
62	*	3885	8267	0.231398	-0.00626974		0.0358073
62	A	2886	84	0.956542	0.981665		0.988421
62	C	3061	42	0.979031	1.0123		1.15533
62	D	1392	31	0.966406	0.995103		1.04784
62	E	2113	49	0.965067	0.993279		1.03886
62	F	2577	45	0.973466	1.00472		1.10182
62	G	2501	54	0.967396	0.996452		1.05471
62	H	2070	49	0.964367	0.992326		1.03429
62	I	2075	80	0.943235	0.963536		0.926025
62	K	3303	102	0.954013	0.97822		0.975282
62	L	2062	99	0.930282	0.945888		0.877334
62	M	1997	45	0.966021	0.994579		1.04522
62	N	2062	43	0.968475	0.997923		1.06242
62	P	2117	355	0.792548	0.75824		0.599743
62	Q	2339	77	0.951125	0.974285		0.96109
62	R	1724	28	0.975275	1.00719		1.11791
62	T	2131	61	0.957229	0.982601		0.992119
62	V	3521	77	0.966991	0.995901		1.05187
62	W	3516	113	0.95223	0.97579		0.966421
62	Y	2735	93	0.949598	0.972204		0.953902
63	*	3757	8591	0.21885	-0.0233649		0.0198388
63	A	3242	161	0.928059	0.94286		0.869838
63	C	5132	217	0.938084	0.956518		0.905531
63	D	1376	63	0.9333	0.95		0.887874
63	E	5451	363	0.90584	0.912588		0.804719
63	F	2248	170	0.894421	0.897031		0.776497
63	G	4060	235	0.917137	0.927979		0.835838
63	H	2640	104	0.942071	0.961949		0.921243
63	I	2920	220	0.894771	0.897508		0.777322
63	K	3535	157	0.935169	0.952546		0.894626
63	L	1958	103	0.924118	0.937491		0.857056
63	M	4704	301	0.909189	0.917151		0.813577
63	P	4828	327	0.904386	0.910608		0.800963
63	Q	3093	186	0.914187	0.923961		0.827358
63	R	3377	137	0.940446	0.959736		0.914722
63	S	2793	99	0.947572	0.969444		0.944683
63	T	3126	154	0.928593	0.943587		0.871617
63	V	3258	151	0.932535	0.948958		0.885164
63	W	4712	400	0.882997	0.881467		0.750841
63	Y	3102	359	0.846991	0.832413		0.682052
64	*	2431	5921	0.208253	-0.0378024		0.00583169
64	A	5140	132	0.961459	0.988363		1.01621
64	C	3561	89	0.962452	0.989717		1.02224
64	D	1628	53	0.951641	0.974987		0.963563
64	E	1687	22	0.98005	1.01369		1.16662
64	F	3254	89	0.959055	0.985089		1.00222
64	G	3615	172	0.930866	0.946684		0.87934
64	I	2888	72	0.962542	0.98984		1.02279
64	K	3010	82	0.959211	0.985301		1.00311
64	L	678	12	0.973116	1.00424		1.09883
64	M	3360	95	0.957732	0.983286		0.99486
64	N	2758	103	0.944917	0.965826		0.933093
64	P	2638	118	0.934735	0.951955		0.893043
64	Q	2983	115	0.943239	0.963541		0.926039
64	R	2462	778	0.669675	0.590838		0.459105
64	S	2647	69	0.960902	0.987604		1.01289
64	T	2083	66	0.952872	0.976666		0.969577
64	V	2833	57	0.96955	0.999387		1.07037
64	W	2907	51	0.973345	1.00456		1.10078
64	Y	1541	59	0.943607	0.964042		0.92757
65	*	2520	5944	0.213592	-0.0305288		0.0129518
65	A	4672	151	0.951973	0.97544		0.965172
65	C	2320	54	0.964942	0.993108		1.03803
65	D	3785	79	0.968448	0.997886		1.06223
65	E	2615	110	0.938385	0.956928		0.906682
65	F	2085	99	0.930998	0.946864		0.879796
65	G	3191	142	0.93505	0.952384		0.894191
65	H	1821	49	0.959691	0.985955		1.00585
65	I	2437	172	0.900764	0.905673		0.791819
65	K	3237	205	0.910039	0.918309		0.815871
65	L	2769	112	0.940613	0.959963		0.915383
65	M	1384	35	0.962025	0.989134		1.01962
65	P	2593	272	0.859299	0.849182		0.703868
65	Q	2228	55	0.962897	0.990323		1.02498
65	R	2187	232	0.857937	0.847326		0.701377
65	S	1692	12	0.989051	1.02595		1.30181
65	T	2669	915	0.651412	0.565956		0.441023
65	V	1283	72	0.919458	0.931142		0.842704
65	W	3358	81	0.963714	0.991436		1.03011
65	Y	1396	80	0.917893	0.929009		0.838054
66	*	2982	8039	0.192011	-0.0599305		-0.0166983
66	A	3106	4485	0.307318	0.0971635		0.121869
66	C	3590	2567	0.47256	0.322289		0.277861
66	D	3469	6898	0.243672	0.0104527		0.0508521
66	E	4665	9853	0.232728	-0.00445837		0.0374632
66	G	2855	6830	0.211228	-0.0337491		0.00981571
66	H	4177	6400	0.29484	0.080164		0.108706
66	I	2239	539	0.726867	0.668756		0.519491
66	K	4597	8973	0.247107	0.0151322		0.0549691
66	L	3062	608	0.763391	0.718517		0.562235
66	M	2991	405	0.825518	0.803158		0.647205
66	N	3676	7362	0.242359	0.00866294		0.0492671
66	P	3016	4222	0.313962	0.106215		0.128755
66	Q	1843	4604	0.204108	-0.04345		0.000210027
66	R	1415	3093	0.226655	-0.0127319		0.0298449
66	S	2476	5125	0.236354	0.000482817		0.0419471
66	T	2109	1922	0.412791	0.24086		0.224023
66	V	2551	1289	0.559056	0.440131		0.354924
66	W	3862	210	0.921763	0.934282		0.849705
66	Y	3751	203	0.922104	0.934747		0.850757
67	*	3370	7024	0.235105	-0.00121913		0.0404081
67	A	3139	76	0.963584	0.991258		1.02929
67	C	3479	74	0.967865	0.997091		1.05803
67	D	1648	30	0.97237	1.00323		1.09259
67	E	3284	91	0.95854	0.984386		0.999329
67	F	2747	55	0.969694	0.999584		1.07146
67	G	2800	155	0.920464	0.932512		0.845736
67	H	4067	103	0.961971	0.989062		1.0193
67	I	1542	90	0.916502	0.927114		0.833989
67	K	3855	161	0.938799	0.957492		0.908276
67	M	2514	73	0.95664	0.981798		0.988945
67	N	2463	55	0.966318	0.994983		1.04724
67	P	959	1421	0.301849	0.089712		0.116137
67	Q	4263	121	0.957574	0.983071		0.993998
67	R	3084	102	0.950908	0.973989		0.960055
67	S	3154	97	0.954193	0.978465		0.976192
67	T	2785	106	0.943921	0.96447		0.928883
67	V	3902	83	0.967864	0.99709		1.05802
67	W	5239	119	0.965759	0.994221		1.04345
67	Y	3213	91	0.957662	0.983191		0.994478
68	*	2386	5053	0.23225	-0.00510883		0.0368694
68	A	2293	188	0.886541	0.886296		0.758558
68	C	1875	52	0.958506	0.984341		0.999143
68	D	5137	12512	0.20825	-0.0378061		0.00582808
68	E	4081	8847	0.228109	-0.0107511		0.0316817
68	F	2205	4510	0.238512	0.0034223		0.044592
68	G	4735	9062	0.250792	0.0201524		0.0593434
68	H	4012	8381	0.234699	-0.00177182		0.0399071
68	I	3229	57	0.973184	1.00434		1.09941
68	K	2707	5841	0.228933	-0.00962817		0.0327195
68	L	3556	215	0.913763	0.923382		0.826161
68	M	3473	931	0.705001	0.638967		0.495619
68	N	4686	10228	0.226911	-0.0123825		0.0301695
68	P	3856	2141	0.535707	0.40832		0.334003
68	Q	3228	7158	0.224148	-0.0161467		0.0266586
68	R	4616	10251	0.223891	-0.0164969		0.0263304
68	S	4562	4754	0.380716	0.197161		0.194265
68	T	2212	445	0.761022	0.715289		0.559334
68	W	2778	6678	0.210424	-0.0348449		0.00874268
68	Y	5936	13008	0.226214	-0.0133325		0.0292863
69	*	4475	8993	0.241729	0.0078047		0.0485049
69	A	3021	125	0.939332	0.958217		0.910342
69	C	2439	44	0.972612	1.00356		1.09459
69	D	4091	164	0.94111	0.960641		0.917367
69	E	2652	60	0.965889	0.9944		1.04433
69	F	2185	47	0.967515	0.996614		1.05554
69	G	3594	99	0.958775	0.984707		1.00065
69	H	1750	50	0.957306	0.982706		0.992535
69	I	2801	35	0.980868	1.01481		1.1761
69	K	1097	41	0.944876	0.965772		0.932922
69	L	1827	16	0.986514	1.0225		1.25499
69	M	2995	114	0.943918	0.964465		0.928869
69	N	4803	91	0.971275	1.00174		1.08371
69	P	2971	2430	0.439232	0.276883		0.248029
69	R	3284	143	0.936356	0.954163		0.89901
69	S	4199	192	0.933381	0.95011		0.888164
69	T	2452	77	0.953273	0.977211		0.971562
69	V	1212	40	0.951008	0.974125		0.96053
69	W	4219	115	0.959189	0.985271		1.00298
69	Y	2129	44	0.968748	0.998295		1.06442
70	*	2643	5542	0.234024	-0.00269185		0.0390718
70	C	2083	1055	0.558477	0.439342		0.354403
70	D	2156	141	0.907372	0.914676		0.808736
70	E	3879	123	0.952838	0.976619		0.969408
70	F	2500	52	0.968554	0.998029		1.063
70	G	2513	108	0.937134	0.955223		0.901924
70	H	2168	48	0.966595	0.995361		1.04914
70	I	2140	57	0.960083	0.986489		1.00811
70	K	2737	68	0.962667	0.990009		1.02356
70	L	3262	85	0.960915	0.987623		1.01298
70	M	1996	38	0.97114	1.00155		1.08264
70	N	1472	27	0.972166	1.00295		1.0909
70	P	3300	324	0.867111	0.859824		0.718553
70	Q	5832	119	0.969133	0.998818		1.06725
70	R	2632	54	0.968969	0.998595		1.06604
70	S	2014	39	0.97066	1.0009		1.07887
70	T	2218	42	0.971291	1.00176		1.08383
70	V	4534	162	0.947174	0.968902		0.94291
70	W	3202	47	0.977601	1.01036		1.14036
70	Y	3897	82	0.9682	0.997547		1.06043
71	*	1906	4180	0.226078	-0.0135174		0.0291142
71	A	2674	57	0.967798	0.997		1.05755
71	C	2498	82	0.951258	0.974466		0.961723
71	D	2906	132	0.933792	0.95067		0.889634
71	E	1698	64	0.944435	0.965171		0.931049
71	F	3380	111	0.951238	0.974439		0.961629
71	H	2801	91	0.951735	0.975116		0.96402
71	I	2406	132	0.921118	0.933403		0.847727
71	K	3657	81	0.966582	0.995343		1.04904
71	L	3744	207	0.920555	0.932636		0.846011
71	M	2230	67	0.955203	0.97984		0.981375
71	N	3318	85	0.96155	0.988487		1.01675
71	P	4073	179	0.935804	0.953411		0.896963
71	Q	3354	89	0.960227	0.986686		1.00894
71	R	1997	45	0.966021	0.994579		1.04522
71	S	4155	94	0.965891	0.994402		1.04434
71	T	3014	108	0.94703	0.968706		0.942273
71	V	2660	84	0.953023	0.97687		0.970322
71	W	3762	269	0.899593	0.904078		0.788926
71	Y	2341	158	0.90469	0.911021		0.801742
72	*	3751	9418	0.203285	-0.0445703		-0.000915157
72	A	3409	84	0.962962	0.990412		1.02539
72	C	1846	58	0.953249	0.977179		0.971447
72	D	1768	58	0.951287	0.974506		0.961864
72	E	2141	98	0.933316	0.950022		0.887932
72	F	1675	53	0.952934	0.976749		0.96988
72	G	2538	35	0.978928	1.01216		1.15421
72	H	2086	43	0.968827	0.998401		1.06499
72	I	2230	51	0.965532	0.993913		1.04194
72	K	2086	48	0.965327	0.993634		1.04058
72	L	4450	201	0.934138	0.951142		0.890882
72	M	3302	137	0.939176	0.958005		0.909737
72	P	2461	36	0.977676	1.01046		1.14112
72	Q	2138	63	0.956027	0.980963		0.985687
72	R	3374	75	0.966466	0.995185		1.04825
72	S	2794	62	0.966522	0.995261		1.04863
72	T	2244	56	0.962507	0.989791		1.02257
72	V	3276	89	0.959319	0.985448		1.00372
72	W	3019	91	0.955064	0.979651		0.980655
72	Y	2965	61	0.968886	0.998482		1.06543
73	*	2683	5671	0.232595	-0.00463879		0.0372986
73	A	4220	130	0.95412	0.978366		0.975824
73	C	3638	98	0.959648	0.985897		1.0056
73	D	4092	207	0.926816	0.941167		0.865739
73	E	1348	53	0.942177	0.962094		0.921674
73	F	3385	86	0.961855	0.988904		1.0186
73	G	2958	153	0.925294	0.939092		0.860802
73	H	1984	46	0.965073	0.993287		1.0389
73	I	1497	34	0.965762	0.994226		1.04348
73	K	2503	71	0.9576	0.983106		0.994137
73	L	3036	76	0.962395	0.989638		1.02188
73	M	1699	35	0.968846	0.998428		1.06514
73	N	1886	63	0.950442	0.973355		0.957851
73	P	3608	512	0.818661	0.793815		0.636797
73	Q	1683	64	0.943968	0.964534		0.929079
73	R	2648	67	0.962006	0.989108		1.01951
73	S	3285	92	0.958115	0.983808		0.996971
73	T	2065	66	0.952481	0.976132		0.967651
73	W	1541	41	0.960126	0.986547		1.00835
73	Y	2544	90	0.947668	0.969575		0.945112
74	*	4563	9705	0.231485	-0.00615153		0.0359156
74	A	1119	27	0.963704	0.991422		1.03005
74	C	2110	42	0.969866	0.999817		1.07275
74	D	2019	75	0.945194	0.966204		0.934277
74	E	4260	186	0.936195	0.953944		0.898412
74	F	4361	131	0.955211	0.979852		0.981418
74	G	4592	138	0.955192	0.979826		0.98132
74	H	2730	111	0.940321	0.959565		0.914226
74	I	3289	69	0.968291	0.997672		1.06109
74	K	2484	75	0.954992	0.979553		0.980281
74	L	1894	45	0.96424	0.992152		1.03347
74	M	4592	90	0.970315	1.00043		1.07619
74	N	1884	39	0.968699	0.998228		1.06406
74	P	810	22	0.959329	0.985461		1.00378
74	R	3741	61	0.975179	1.00706		1.11703
74	S	3395	70	0.968819	0.998391		1.06494
74	T	1857	56	0.955044	0.979624		0.980554
74	V	3598	81	0.966052	0.994622		1.04543
74	W	4607	78	0.974253	1.00579		1.10868
74	Y	740	24	0.951814	0.975224		0.964402
75	*	1782	4060	0.219474	-0.0225144		0.0206484
75	A	3337	243	0.897934	0.901818		0.78488
75	C	3944	180	0.933498	0.95027		0.888583
75	D	2856	4951	0.269836	0.0460986		0.0813035
75	E	5943	2403	0.613064	0.513711		0.404393
75	F	3454	159	0.932962	0.949539		0.886672
75	G	2451	611	0.719881	0.659238		0.511742
75	H	3735	268	0.899278	0.903649		0.788154
75	I	2973	84	0.95776	0.983324		0.995013
75	K	1074	138	0.83294	0.813269		0.658839
75	M	2647	66	0.962538	0.989834		1.02276
75	N	3118	486	0.80431	0.774264		0.615968
75	P	1819	80	0.93576	0.953351		0.8968
75	Q	2337	256	0.85398	0.841934		0.694252
75	R	3672	445	0.840926	0.824149		0.671829
75	S	3592	704	0.765738	0.721714		0.565129
75	T	3509	267	0.893837	0.896236		0.77513
75	V	5035	135	0.959829	0.986143		1.00664
75	W	4152	647	0.804351	0.77432		0.616026
75	Y	3000	149	0.928051	0.942849		0.869812
76	*	4303	9386	0.227024	-0.0122288		0.0303122
76	A	3075	103	0.950313	0.973178		0.957241
76	C	2912	62	0.967835	0.99705		1.05781
76	D	4251	157	0.945493	0.966612		0.935563
76	E	2944	102	0.948693	0.970972		0.949744
76	F	1891	56	0.955817	0.980677		0.984581
76	G	1984	81	0.94009	0.959251		0.913314
76	H	790	18	0.965656	0.994082		1.04277
76	I	3598	54	0.977109	1.00969		1.13543
76	K	1541	38	0.962935	0.990375		1.02522
76	L	3071	61	0.969927	0.999901		1.07322
76	M	2352	59	0.962319	0.989536		1.02142
76	N	3202	119	0.94517	0.966171		0.934175
76	P	2784	131	0.931576	0.947652		0.881803
76	Q	2186	85	0.942778	0.962913		0.924136
76	S	1899	85	0.934695	0.9519		0.892897
76	T	2815	60	0.967801	0.997004		1.05757
76	V	4061	72	0.97307	1.00418		1.09844
76	W	4063	101	0.962647	0.989982		1.02343
76	Y	2143	31	0.977919	1.01079		1.1436
77	*	3106	6664	0.229937	-0.00826083		0.0339794
77	A	3672	343	0.872748	0.867504		0.729613
77	C	2318	73	0.953145	0.977037		0.970929
77	D	2396	1755	0.466562	0.314117		0.272516
77	E	4617	2772	0.516217	0.381767		0.31665
77	F	3300	2619	0.446665	0.287009		0.254715
77	G	2411	1431	0.519086	0.385676		0.319201
77	H	2249	1064	0.575216	0.462147		0.369536
77	I	1461	58	0.941649	0.961374		0.919532
77	K	2947	1700	0.526195	0.39536		0.325525
77	L	4645	271	0.916533	0.927156		0.834079
77	M	3559	430	0.841331	0.824702		0.672502
77	N	2830	827	0.686744	0.614093		0.476468
77	P	1945	200	0.861692	0.852441		0.708292
77	Q	4008	1850	0.581229	0.47034		0.375008
77	R	659	1128	0.272344	0.0495148		0.08412
77	S	2966	589	0.763372	0.718491		0.562212
77	T	2846	130	0.933445	0.950197		0.888392
77	W	3602	2980	0.436416	0.273047		0.24549
77	Y	5267	1959	0.632682	0.540439		0.422932
78	*	3226	8232	0.200677	-0.0481246		-0.00450763
78	A	1050	64	0.913123	0.922511		0.824365
78	C	2748	96	0.948289	0.970421		0.947908
78	D	2898	185	0.909384	0.917417		0.814101
78	E	2530	127	0.927338	0.941878		0.867451
78	F	2627	113	0.937081	0.955151		0.901726
78	G	3211	217	0.904578	0.910869		0.801454
78	H	2708	101	0.944985	0.965919		0.933384
78	K	2228	98	0.935752	0.953341		0.896772
78	L	2468	79	0.952413	0.976039		0.967314
78	M	3431	558	0.797536	0.765035		0.606537
78	N	2266	93	0.939794	0.958847		0.912149
78	P	2238	3023	0.321704	0.116763		0.136681
78	Q	2412	131	0.921848	0.934398		0.849967
78	R	2653	103	0.942861	0.963026		0.924478
78	S	3674	203	0.920601	0.932699		0.846153
78	T	1795	50	0.958332	0.984103		0.998171
78	V	2845	89	0.953443	0.977442		0.972412
78	W	2979	105	0.947851	0.969825		0.945933
78	Y	4030	212	0.924117	0.937489		0.857052
79	*	4206	9441	0.222037	-0.0190232		0.0239548
79	A	2431	108	0.935151	0.952521		0.894561
79	C	3545	103	0.956615	0.981764		0.98881
79	D	2853	87	0.954563	0.978969		0.97808
79	E	1481	47	0.952801	0.976569		0.969225
79	F	1968	62	0.953129	0.977015		0.970848
79	H	2805	581	0.755677	0.708007		0.55286
79	I	3035	120	0.94187	0.961676		0.920429
79	K	3071	124	0.94071	0.960095		0.915768
79	L	3866	145	0.944693	0.965522		0.932141
79	M	3123	76	0.963404	0.991013		1.02815
79	N	2157	78	0.94657	0.968079		0.940247
79	P	2918	5484	0.254222	0.0248252		0.0633767
79	Q	2705	81	0.955346	0.980035		0.982117
79	R	2120	38	0.972782	1.00379		1.09602
79	S	1329	42	0.952989	0.976825		0.970155
79	T	2669	70	0.960671	0.987291		1.01154
79	V	3477	153	0.935728	0.953308		0.896683
79	W	2888	68	0.96455	0.992574		1.03548
79	Y	2517	86	0.949367	0.97189		0.952834
80	*	3815	7888	0.23655	0.000749503		0.0421878
80	A	4056	229	0.919008	0.930529		0.841359
80	C	2856	70	0.963152	0.99067		1.02657
80	D	4541	583	0.833054	0.813425		0.659021
80	E	3061	336	0.853722	0.841584		0.693795
80	F	2534	50	0.97012	1.00016		1.0747
80	G	3842	242	0.910481	0.918912		0.817073
80	I	2646	67	0.961978	0.989071		1.01934
80	K	3389	412	0.840504	0.823575		0.671129
80	L	4616	203	0.935764	0.953356		0.896814
80	M	3316	145	0.936106	0.953822		0.898079
80	N	2466	67	0.959316	0.985444		1.0037
80	P	5076	1004	0.764092	0.719471		0.563097
80	Q	2008	88	0.935972	0.953641		0.897586
80	R	4039	321	0.889636	0.890512		0.765469
80	S	2453	175	0.899799	0.904359		0.789433
80	T	1396	87	0.911345	0.920089		0.819436
80	V	2488	431	0.787152	0.750888		0.592527
80	W	3909	207	0.923652	0.936856		0.855584
80	Y	3375	131	0.942874	0.963043		0.92453
81	*	2607	6974	0.193212	-0.0582945		-0.0149844
81	A	4356	144	0.950931	0.97402		0.960163
81	C	2539	60	0.964425	0.992405		1.03467
81	D	2068	69	0.950497	0.973429		0.958107
81	E	1880	26	0.978869	1.01208		1.15358
81	F	2439	36	0.977479	1.01019		1.13913
81	G	3318	76	0.96548	0.993843		1.0416
81	H	3062	111	0.946445	0.967909		0.939698
81	I	3122	31	0.984737	1.02008		1.22712
81	K	1625	33	0.969275	0.999012		1.06831
81	L	1803	8	0.993122	1.0315		1.4059
81	M	4536	53	0.982088	1.01647		1.191
81	N	3266	69	0.968075	0.997378		1.05954
81	P	2215	175	0.890215	0.891301		0.766781
81	Q	4052	63	0.976306	1.00859		1.12759
81	R	2491	59	0.964347	0.992298		1.03416
81	T	2671	46	0.973821	1.00521		1.10489
81	V	4022	94	0.964803	0.992919		1.03712
81	W	3121	54	0.973703	1.00504		1.10386
81	Y	2191	45	0.968936	0.998551		1.0658
82	*	3524	8192	0.216048	-0.0271824		0.0161839
82	A	2379	261	0.853789	0.841674		0.693912
82	C	3263	516	0.802027	0.771154		0.612762
82	D	1955	482	0.722103	0.662265		0.514194
82	E	5533	1124	0.759246	0.712869		0.557172
82	F	2386	655	0.700033	0.632197		0.490342
82	G	4152	611	0.813204	0.786381		0.628732
82	H	2314	484	0.75387	0.705546		0.550693
82	I	3144	433	0.823061	0.799811		0.64344
82	K	3280	640	0.766534	0.722799		0.566115
82	L	3776	522	0.822513	0.799064		0.642605
82	N	1585	497	0.671387	0.59317		0.460825
82	P	2568	398	0.805204	0.775483		0.617231
82	Q	2950	351	0.843366	0.827474		0.675903
82	R	3853	1241	0.665444	0.585073		0.454873
82	S	4290	645	0.809922	0.781911		0.62397
82	T	2526	562	0.742233	0.68969		0.536986
82	V	2649	413	0.804271	0.774211		0.615912
82	W	4342	2401	0.536725	0.409707		0.334911
82	Y	2490	943	0.628476	0.534709		0.418925
83	*	2659	5457	0.237899	0.00258682		0.0438419
83	A	2100	61	0.956625	0.981778		0.988867
83	C	4117	158	0.943481	0.963871		0.927045
83	D	771	20	0.961085	0.987854		1.01398
83	E	1937	23	0.981803	1.01608		1.18742
83	F	2299	72	0.953393	0.977375		0.972163
83	G	2872	81	0.957833	0.983423		0.995413
83	H	1802	60	0.950594	0.973562		0.958568
83	I	2805	116	0.939362	0.958259		0.910462
83	K	1733	50	0.956905	0.98216		0.990369
83	L	3859	58	0.977077	1.00964		1.13511
83	M	1718	74	0.937001	0.955042		0.901424
83	N	2691	84	0.953539	0.977574		0.972893
83	P	3199	132	0.939489	0.958432		0.910955
83	R	3898	86	0.966708	0.995515		1.04992
83	S	2239	48	0.96762	0.996757		1.05629
83	T	2546	47	0.971992	1.00271		1.08948
83	V	3960	98	0.962808	0.990201		1.02443
83	W	5265	115	0.96703	0.995953		1.05214
83	Y	1846	50	0.959436	0.985608		1.00439
84	*	3582	7733	0.228842	-0.00975191		0.0326052
84	A	2327	70	0.95515	0.979769		0.981103
84	C	2789	127	0.933638	0.950461		0.889084
84	D	1842	36	0.970396	1.00054		1.07682
84	E	1956	46	0.964591	0.99263		1.03574
84	F	2316	72	0.953719	0.977819		0.973799
84	G	3048	75	0.963012	0.990479		1.0257
84	H	1370	26	0.971229	1.00167		1.08334
84	I	2755	212	0.892765	0.894775		0.772633
84	K	2249	57	0.961944	0.989025		1.01913
84	L	1445	72	0.927836	0.942556		0.869096
84	M	2549	77	0.954971	0.979524		0.980173
84	P	2443	4417	0.261629	0.0349168		0.0719668
84	Q	1193	16	0.979495	1.01294		1.1604
84	R	2350	73	0.953754	0.977866		0.973972
84	S	2405	44	0.972235	1.00305		1.09147
84	T	3353	128	0.943763	0.964254		0.928221
84	V	3594	177	0.928614	0.943615		0.871687
84	W	3534	110	0.953665	0.977746		0.973527
84	Y	1165	30	0.961358	0.988225		1.0156
85	*	2680	6307	0.213975	-0.0300066		0.0134578
85	A	1313	40	0.954605	0.979026		0.978295
85	D	5047	8443	0.276912	0.055739		0.0892104
85	E	3296	6466	0.246172	0.0138584		0.0538523
85	F	1560	1327	0.429591	0.263748		0.239319
85	G	2996	464	0.805317	0.775636		0.61739
85	H	1194	831	0.479299	0.33147		0.283858
85	I	3637	2379	0.494799	0.352587		0.297629
85	K	2232	240	0.85628	0.845068		0.698373
85	L	2596	2625	0.387842	0.206869		0.200949
85	M	4698	1758	0.631271	0.538517		0.421586
85	N	3126	828	0.707487	0.642353		0.498279
85	P	2574	1511	0.521837	0.389424		0.321647
85	Q	2368	1810	0.455973	0.29969		0.263058
85	R	2829	1741	0.510043	0.373356		0.311165
85	S	2416	95	0.942172	0.962087		0.921653
85	T	2287	49	0.967639	0.996783		1.05642
85	V	3861	1788	0.580431	0.469252		0.374281
85	W	2293	5464	0.211884	-0.0328554		0.0106886
85	Y	2357	2177	0.409546	0.236438		0.221047
86	*	2082	5912	0.184081	-0.0707346		-0.0282276
86	A	1775	13	0.988697	1.02547		1.29467
86	C	3920	103	0.960602	0.987196		1.01113
86	D	3465	117	0.949932	0.972659		0.955457
86	E	2921	78	0.959986	0.986357		1.00754
86	F	1772	40	0.965964	0.994501		1.04484
86	G	1190	50	0.938451	0.957018		0.906936
86	H	4138	49	0.981852	1.01615		1.18803
86	I	2224	80	0.946836	0.968442		0.941417
86	K	2019	147	0.897949	0.901838		0.784915
86	L	1423	18	0.980638	1.01449		1.17338
86	M	1492	1757	0.352339	0.158499		0.167128
86	N	1865	35	0.97154	1.0021		1.08583
[truncated: 4,378 more rows]
