# Supplementary material for: Comprehensive fitness landscape of SARS-CoV-2 Mpro reveals insights into viral resistance mechanisms
Source: eLife. 2022 Jun 20;11:e77433. doi: 10.7554/eLife.77433 (PMC9323007; doi:10.7554/eLife.77433)
Supplement: Figure 4—source data 1. [file elife-77433-fig4-data1.xlsx]

## Sheet: Average functional scores
	Average functional score
position	FRET rep1	TF rep1	Growth rep1
1	1.01509	0.993974	1.02768
2	0.855929	0.980411	0.592991
3	0.283993	0.416486	0.283954
4	0.689551	0.805429	0.609894
5	0.93944	0.975317	0.875678
6	0.326786	0.54574	0.351044
7	0.228834	0.30222	0.235104
8	0.633884	0.806532	0.602537
9	0.011814	0.066745	-0.006856
10	0.061153	0.078153	0.050688
11	0.00821	0.064399	0.016231
12	0.294571	0.670454	0.335688
13	0.238207	0.303198	0.210283
14	0.000239	0.008331	-0.003628
15	1.01008	0.993907	0.93112
16	0.306212	0.425745	0.306078
17	0.388925	0.624472	0.399779
18	0.428667	0.488014	0.384671
19	1.01352	1.00124	0.936544
20	0.426965	0.447577	0.278385
21	0.931872	0.93022	0.910969
22	0.95211	0.947369	0.785242
23	1.00156	1.00007	0.946678
24	1.01123	0.999849	0.990214
25	0.970432	0.984277	0.841115
26	0.949439	0.973928	0.906354
27	nan	nan	nan
28	nan	nan	nan
29	0.089516	0.111502	0.059246
30	0.541567	0.634368	0.446783
31	0.199296	0.2586	0.180372
32	0.395129	0.360678	0.295304
33	0.950598	0.937725	0.962631
34	0.974168	0.968629	0.967486
35	0.956816	0.944816	0.953985
36	0.32386	0.34837	0.259443
37	0.924254	0.921824	0.866196
38	0.662096	0.675599	0.530067
39	0.270369	0.37702	0.128755
40	-0.000777	0.02036	-0.017617
41	9.4e-05	0.003593	-0.006824
42	0.522422	0.551468	0.283101
43	0.812423	0.905231	0.569736
44	0.788247	0.958441	0.55702
45	1.01477	1.00358	0.991268
46	1.0102	0.993003	0.99011
47	1.00194	0.992192	0.988013
48	1.01997	1.00593	0.834318
49	0.974026	0.979944	0.795386
50	0.968337	0.972042	1.03112
51	0.962661	0.989661	0.917234
52	0.966301	0.995909	0.662746
53	1.00699	0.996233	0.974881
54	0.428272	0.757029	0.228271
55	1.00085	0.987058	1.00527
56	1.00077	0.961248	0.98372
57	0.964724	0.99487	0.795451
58	0.983259	0.994945	0.885999
59	1.0145	0.999037	0.989788
60	1.00508	0.998055	1.00426
61	1.00406	0.99635	0.931627
62	1.00716	1.00277	0.994668
63	1.00587	0.999687	0.949579
64	0.984828	0.957607	0.979315
65	1.00366	0.975377	0.959676
66	0.482411	0.622769	0.349681
67	0.994459	0.981697	0.95257
68	0.426531	0.450296	0.357956
69	0.996049	0.982492	0.962148
70	0.994311	0.939523	0.967039
71	0.998863	0.993584	0.986698
72	1.0074	1.0042	1.008
73	0.991616	0.992045	0.985876
74	0.996792	1	1.00266
75	0.959473	0.978307	0.878368
76	1.00142	0.993555	0.992534
77	0.954551	0.994255	0.691219
78	0.968301	0.988133	0.922804
79	0.944708	0.951161	0.932532
80	0.999817	0.966085	0.942248
81	1.00689	0.973545	0.9969
82	1.00868	1.00137	0.80676
83	1.00879	0.990146	0.99667
84	0.986344	0.989389	0.935888
85	0.803269	0.915995	0.578957
86	0.846141	0.836181	0.831562
87	0.737476	0.8046	0.519896
88	1.00384	0.969485	0.985771
89	0.524346	0.609295	0.396739
90	0.976334	0.972886	0.996156
91	0.446954	0.540393	0.430231
92	1.01242	0.979575	1.00599
93	1.00121	0.996341	0.995334
94	0.991738	0.985243	0.998513
95	0.39344	0.653382	0.308744
96	1.01574	0.985617	1.00357
97	0.99667	1.00321	0.932176
98	0.785376	0.908969	0.615862
99	0.790944	0.983568	0.664633
100	1.0076	0.990506	0.985677
101	0.898239	0.901637	0.822092
102	0.93955	0.926692	0.920684
103	0.938671	0.999603	0.908014
104	0.991488	0.997468	0.980586
105	0.977527	1.00456	0.839225
106	0.922357	0.972494	0.824038
107	0.989496	0.95168	0.957475
108	0.958269	0.961434	0.891529
109	0.09876	0.351254	0.176955
110	0.866982	0.935959	0.86565
111	0.061187	0.145292	0.079841
112	0.612014	0.665124	0.508444
113	0.066128	0.099453	0.07439
114	0.520145	0.578319	0.413089
115	0.084711	0.187251	0.106412
116	0.901442	0.965961	0.706742
117	0.175335	0.294759	0.180025
118	0.293585	0.729952	0.138403
119	0.953502	0.955302	0.93883
120	0.128981	0.362252	0.08969
121	0.951021	0.935579	0.946864
122	0.236986	0.598886	0.294432
123	0.933693	0.916692	0.829671
124	0.407919	0.675298	0.418746
125	0.134023	0.27794	0.171858
126	0.672254	0.773626	0.464191
127	0.612901	0.806457	0.612434
128	0.709535	0.789141	0.588036
129	0.471749	0.514755	0.412049
130	0.404877	0.521426	0.339518
131	0.002641	0.012542	-0.007551
132	0.799738	0.914356	0.777356
133	0.174963	0.455825	0.176078
134	0.888681	0.899289	0.845452
135	0.501915	0.711885	0.3804
136	0.599242	0.649207	0.511288
137	0.894619	0.898939	0.836932
138	0.134138	0.354645	0.110471
139	0.865289	0.927283	0.64938
140	0.335716	0.491729	0.249692
141	0.957832	0.944458	0.869709
142	1.00197	0.994075	0.953258
143	0.164544	0.450862	0.006128
144	0.320732	0.527878	0.132806
145	0.003985	0.012911	0.001065
146	0.00336	0.008834	0.013788
147	0.059027	0.19939	0.052413
148	0.571102	0.613124	0.471108
149	0.098425	0.109904	0.069765
150	0.117952	0.125034	0.118819
151	0.962341	0.898297	0.967644
152	0.835424	0.970777	0.723174
153	1.00501	0.9949	0.986676
154	0.996149	0.977296	0.969352
155	1.00893	0.980112	0.936782
156	0.969445	0.989918	0.951397
157	0.611408	0.734832	0.541559
158	0.955052	0.904352	0.925003
159	0.358697	0.418412	0.322537
160	1.0053	0.951735	0.915103
161	0.360023	0.471068	0.116909
162	0.629396	0.661703	0.51567
163	0.018471	0.051718	0.025247
164	0.622043	0.733274	0.399233
165	0.370739	0.471759	0.271435
166	0.766589	0.841022	0.468016
167	0.231729	0.477519	0.336378
168	1.00838	0.95581	1.03269
169	1.01015	0.95862	0.889481
170	0.957099	0.976555	0.902586
171	1.00205	0.99675	0.914351
172	0.270677	0.558349	0.125044
173	0.32071	0.45736	0.265671
174	0.007588	0.00758	0.001169
175	0.247374	0.327756	0.1572
176	0.303646	0.348396	0.252965
177	0.801637	0.787462	0.660332
178	0.994121	0.993998	1.00932
179	-0.001156	0.000369	0.003284
180	0.954526	0.946824	0.924581
181	0.218342	0.360932	0.192267
182	0.256949	0.303668	0.136447
183	0.00409	0.010935	-0.005274
184	0.994619	0.996636	0.901049
185	0.132402	0.303519	0.117286
186	0.916751	0.934483	0.836917
187	-0.002741	0.004044	-0.020101
188	0.929207	0.94451	0.745293
189	0.817186	0.945866	0.573123
190	0.939305	0.948444	0.77807
191	1.00292	0.998441	0.961278
192	0.093425	0.597389	0.218857
193	0.993819	0.972507	0.973653
194	0.77136	0.918371	0.699426
195	0.910783	0.975568	0.871865
196	1.00084	0.920074	0.9952
197	0.01369	0.076611	0.015851
198	0.966246	0.954557	0.942246
199	1.01207	1.00475	0.994128
200	0.318403	0.410094	0.305259
201	0.523103	0.54699	0.406703
202	0.9761	0.992047	0.897268
203	0.063274	0.078302	0.033441
204	0.536233	0.558541	0.41364
205	0.435691	0.523902	0.385986
206	0.230193	0.276515	0.185813
207	0.549753	0.757712	0.432956
208	0.46848	0.527011	0.348918
209	0.357246	0.478412	0.20155
210	0.176757	0.512618	0.228438
211	0.691429	0.859967	0.439014
212	0.946785	0.929227	0.874116
213	0.962105	0.99584	0.865107
214	0.942454	0.94514	0.80391
215	0.912854	0.927254	0.850081
216	0.876273	0.903611	0.687158
217	1.00832	0.988109	1.01715
218	0.995754	0.993778	0.9048
219	0.808748	0.986113	0.550999
220	0.957813	0.990124	0.956759
221	0.998339	0.972952	0.986668
222	1.00484	1.00059	0.987495
223	1.00428	0.99066	0.994612
224	1.00862	1.00003	0.991805
225	1.00338	0.978455	0.956326
226	1.01075	0.998826	0.94103
227	1.00476	1.00498	0.962755
228	1.00624	0.968801	0.991032
229	0.999332	0.99951	0.983788
230	0.56701	0.63179	0.459063
231	0.914465	0.989097	0.749724
232	1.00725	0.99463	0.99746
233	0.988859	0.988842	0.986421
234	0.874591	0.938626	0.780416
235	1.00996	1.00161	0.998168
236	1.00441	0.996107	0.995877
237	0.96284	0.980047	0.942168
238	0.995361	0.983555	0.991843
239	0.871226	0.862864	0.831542
240	0.957456	0.927499	0.922552
241	0.996439	0.996094	0.986481
242	0.399368	0.408817	0.359792
243	1.00509	0.942019	0.970441
244	1.00775	0.979271	0.987403
245	1.00821	0.987849	1.00003
246	0.998723	0.998698	0.948936
247	1.01369	1.001	0.936055
248	0.992423	0.901578	0.965546
249	1.00062	0.996543	1.00781
250	0.422997	0.527704	0.324785
251	0.961782	0.977026	0.945678
252	1.01025	1.00191	1.01785
253	0.540912	0.717648	0.410398
254	1.003	0.992937	0.967182
255	0.975523	0.985234	0.968543
256	1.02122	0.954637	1.00654
257	0.758952	0.869656	0.601743
258	nan	nan	nan
259	0.929741	0.956411	0.725028
260	1.01582	0.982272	1.00304
261	0.931901	0.988052	0.802728
262	1.00926	0.997738	1.00524
263	1.01906	0.996798	0.996408
264	0.450122	0.556224	0.361212
265	0.620698	0.654258	0.526935
266	0.943087	0.94473	0.903173
267	0.99281	0.982249	0.897769
268	0.604507	0.668417	0.476297
269	1.01187	0.996774	0.98796
270	0.970561	0.979611	1.00053
271	0.792815	0.87482	0.598729
272	0.874521	0.921761	0.80072
273	1.00089	0.954004	0.994566
274	1.00765	1.0029	0.995915
275	0.988529	0.997223	0.801041
276	0.997723	0.992867	0.980573
277	1.00976	0.991702	1.00736
278	0.996292	0.973379	0.92878
279	1.00496	0.973312	0.963881
280	1.01866	0.994715	0.978396
281	0.705396	0.978778	0.482023
282	0.633469	0.849134	0.532008
283	0.996832	0.984996	0.868651
284	1.00791	1.00399	0.971617
285	0.993952	0.998855	0.898545
286	0.996971	1.00411	0.929065
287	1.00952	0.996163	0.954027
288	0.108708	0.336556	0.160714
289	0.005294	0.011107	0.000463
290	0.015272	0.023802	-0.018148
291	0.768566	0.806142	0.700654
292	0.574651	0.744389	0.578566
293	0.996161	0.995623	0.927178
294	1.00385	0.998189	1.00111
295	0.00791	0.101805	0.034401
296	0.363546	0.567264	0.307949
297	0.994786	0.988692	0.95311
298	0.274164	0.678205	0.345209
299	0.406482	0.775718	0.358409
300	0.874082	0.927072	0.765308
301	0.997237	0.999155	0.988806
302	1.01032	1.0033	0.935048
303	0.98646	0.94963	0.952761
304	1.00111	0.999038	0.938773
305	1.0096	0.99807	0.932464
306	0.997543	0.983529	1.00739
