# Supplementary material for: Comprehensive fitness landscape of SARS-CoV-2 Mpro reveals insights into viral resistance mechanisms
Source: eLife. 2022 Jun 20;11:e77433. doi: 10.7554/eLife.77433 (PMC9323007; doi:10.7554/eLife.77433)
Supplement: Figure 5—source data 1. [file elife-77433-fig5-data1.xlsx]

## Sheet: Mpro_variant_frequency
position	reference_aa	aa	count	total_coverage	frequency
1	S	-	0	5310884	0
1	S	A	1	5310884	1.88293e-07
1	S	C	0	5310884	0
1	S	D	0	5310884	0
1	S	E	1	5310884	1.88293e-07
1	S	F	0	5310884	0
1	S	G	0	5310884	0
1	S	H	0	5310884	0
1	S	I	0	5310884	0
1	S	K	0	5310884	0
1	S	L	0	5310884	0
1	S	M	0	5310884	0
1	S	N	332	5310884	6.25131e-05
1	S	P	0	5310884	0
1	S	Q	0	5310884	0
1	S	R	0	5310884	0
1	S	S	5310549	5310884	0.999937
1	S	T	1	5310884	1.88293e-07
1	S	V	0	5310884	0
1	S	W	0	5310884	0
1	S	Y	0	5310884	0
2	G	-	0	5311757	0
2	G	A	3	5311757	5.64785e-07
2	G	C	2	5311757	3.76523e-07
2	G	D	4	5311757	7.53046e-07
2	G	E	2	5311757	3.76523e-07
2	G	F	0	5311757	0
2	G	G	5311742	5311757	0.999997
2	G	H	0	5311757	0
2	G	I	0	5311757	0
2	G	K	0	5311757	0
2	G	L	0	5311757	0
2	G	M	0	5311757	0
2	G	N	0	5311757	0
2	G	P	0	5311757	0
2	G	Q	0	5311757	0
2	G	R	0	5311757	0
2	G	S	0	5311757	0
2	G	T	0	5311757	0
2	G	V	4	5311757	7.53046e-07
2	G	W	0	5311757	0
2	G	Y	0	5311757	0
3	F	-	0	5311931	0
3	F	A	0	5311931	0
3	F	C	3	5311931	5.64766e-07
3	F	D	0	5311931	0
3	F	E	0	5311931	0
3	F	F	5311662	5311931	0.999949
3	F	G	0	5311931	0
3	F	H	0	5311931	0
3	F	I	1	5311931	1.88255e-07
3	F	K	0	5311931	0
3	F	L	18	5311931	3.3886e-06
3	F	M	0	5311931	0
3	F	N	0	5311931	0
3	F	P	0	5311931	0
3	F	Q	0	5311931	0
3	F	R	0	5311931	0
3	F	S	2	5311931	3.76511e-07
3	F	T	0	5311931	0
3	F	V	241	5311931	4.53696e-05
3	F	W	2	5311931	3.76511e-07
3	F	Y	2	5311931	3.76511e-07
4	R	-	1	5312863	1.88222e-07
4	R	A	0	5312863	0
4	R	C	0	5312863	0
4	R	D	0	5312863	0
4	R	E	10	5312863	1.88222e-06
4	R	F	12	5312863	2.25867e-06
4	R	G	2	5312863	3.76445e-07
4	R	H	0	5312863	0
4	R	I	11	5312863	2.07045e-06
4	R	K	662	5312863	0.000124603
4	R	L	2	5312863	3.76445e-07
4	R	M	0	5312863	0
4	R	N	0	5312863	0
4	R	P	1	5312863	1.88222e-07
4	R	Q	0	5312863	0
4	R	R	5312144	5312863	0.999865
4	R	S	18	5312863	3.388e-06
4	R	T	0	5312863	0
4	R	V	0	5312863	0
4	R	W	0	5312863	0
4	R	Y	0	5312863	0
5	K	-	2	5312949	3.76439e-07
5	K	A	0	5312949	0
5	K	C	0	5312949	0
5	K	D	0	5312949	0
5	K	E	20	5312949	3.76439e-06
5	K	F	0	5312949	0
5	K	G	0	5312949	0
5	K	H	0	5312949	0
5	K	I	1	5312949	1.88219e-07
5	K	K	5312842	5312949	0.99998
5	K	L	0	5312949	0
5	K	M	0	5312949	0
5	K	N	29	5312949	5.45836e-06
5	K	P	1	5312949	1.88219e-07
5	K	Q	21	5312949	3.95261e-06
5	K	R	29	5312949	5.45836e-06
5	K	S	0	5312949	0
5	K	T	2	5312949	3.76439e-07
5	K	V	1	5312949	1.88219e-07
5	K	W	0	5312949	0
5	K	Y	1	5312949	1.88219e-07
6	M	-	11	5313465	2.07021e-06
6	M	A	0	5313465	0
6	M	C	0	5313465	0
6	M	D	0	5313465	0
6	M	E	0	5313465	0
6	M	F	1	5313465	1.88201e-07
6	M	G	0	5313465	0
6	M	H	0	5313465	0
6	M	I	158	5313465	2.97358e-05
6	M	K	1	5313465	1.88201e-07
6	M	L	44	5313465	8.28085e-06
6	M	M	5313216	5313465	0.999953
6	M	N	0	5313465	0
6	M	P	0	5313465	0
6	M	Q	0	5313465	0
6	M	R	1	5313465	1.88201e-07
6	M	S	2	5313465	3.76402e-07
6	M	T	12	5313465	2.25841e-06
6	M	V	18	5313465	3.38762e-06
6	M	W	1	5313465	1.88201e-07
6	M	Y	0	5313465	0
7	A	-	0	5313747	0
7	A	A	5312671	5313747	0.999798
7	A	C	0	5313747	0
7	A	D	0	5313747	0
7	A	E	1	5313747	1.88191e-07
7	A	F	1	5313747	1.88191e-07
7	A	G	12	5313747	2.25829e-06
7	A	H	0	5313747	0
7	A	I	0	5313747	0
7	A	K	0	5313747	0
7	A	L	0	5313747	0
7	A	M	0	5313747	0
7	A	N	0	5313747	0
7	A	P	4	5313747	7.52764e-07
7	A	Q	0	5313747	0
7	A	R	0	5313747	0
7	A	S	47	5313747	8.84498e-06
7	A	T	776	5313747	0.000146036
7	A	V	235	5313747	4.42249e-05
7	A	W	0	5313747	0
7	A	Y	0	5313747	0
8	F	-	0	5314228	0
8	F	A	0	5314228	0
8	F	C	10	5314228	1.88174e-06
8	F	D	0	5314228	0
8	F	E	0	5314228	0
8	F	F	5313418	5314228	0.999848
8	F	G	0	5314228	0
8	F	H	0	5314228	0
8	F	I	9	5314228	1.69357e-06
8	F	K	0	5314228	0
8	F	L	743	5314228	0.000139813
8	F	M	0	5314228	0
8	F	N	0	5314228	0
8	F	P	0	5314228	0
8	F	Q	0	5314228	0
8	F	R	0	5314228	0
8	F	S	6	5314228	1.12904e-06
8	F	T	2	5314228	3.76348e-07
8	F	V	5	5314228	9.4087e-07
8	F	W	1	5314228	1.88174e-07
8	F	Y	34	5314228	6.39792e-06
9	P	-	1	5315294	1.88136e-07
9	P	A	0	5315294	0
9	P	C	0	5315294	0
9	P	D	0	5315294	0
9	P	E	0	5315294	0
9	P	F	0	5315294	0
9	P	G	0	5315294	0
9	P	H	0	5315294	0
9	P	I	0	5315294	0
9	P	K	5	5315294	9.40682e-07
9	P	L	2	5315294	3.76273e-07
9	P	M	0	5315294	0
9	P	N	0	5315294	0
9	P	P	5315225	5315294	0.999987
9	P	Q	1	5315294	1.88136e-07
9	P	R	0	5315294	0
9	P	S	56	5315294	1.05356e-05
9	P	T	4	5315294	7.52545e-07
9	P	V	0	5315294	0
9	P	W	0	5315294	0
9	P	Y	0	5315294	0
10	S	-	1	5315622	1.88125e-07
10	S	A	144	5315622	2.709e-05
10	S	C	1	5315622	1.88125e-07
10	S	D	0	5315622	0
10	S	E	0	5315622	0
10	S	F	13	5315622	2.44562e-06
10	S	G	0	5315622	0
10	S	H	0	5315622	0
10	S	I	4	5315622	7.52499e-07
10	S	K	0	5315622	0
10	S	L	0	5315622	0
10	S	M	0	5315622	0
10	S	N	5	5315622	9.40624e-07
10	S	P	5	5315622	9.40624e-07
10	S	Q	0	5315622	0
10	S	R	0	5315622	0
10	S	S	5315433	5315622	0.999964
10	S	T	16	5315622	3.01e-06
10	S	V	0	5315622	0
10	S	W	0	5315622	0
10	S	Y	0	5315622	0
11	G	-	1	5320485	1.87953e-07
11	G	A	0	5320485	0
11	G	C	1	5320485	1.87953e-07
11	G	D	0	5320485	0
11	G	E	0	5320485	0
11	G	F	0	5320485	0
11	G	G	5320463	5320485	0.999996
11	G	H	0	5320485	0
11	G	I	0	5320485	0
11	G	K	0	5320485	0
11	G	L	0	5320485	0
11	G	M	0	5320485	0
11	G	N	0	5320485	0
11	G	P	0	5320485	0
11	G	Q	0	5320485	0
11	G	R	0	5320485	0
11	G	S	20	5320485	3.75906e-06
11	G	T	0	5320485	0
11	G	V	0	5320485	0
11	G	W	0	5320485	0
11	G	Y	0	5320485	0
12	K	-	1	5320661	1.87947e-07
12	K	A	0	5320661	0
12	K	C	0	5320661	0
12	K	D	0	5320661	0
12	K	E	2	5320661	3.75893e-07
12	K	F	0	5320661	0
12	K	G	0	5320661	0
12	K	H	0	5320661	0
12	K	I	6	5320661	1.12768e-06
12	K	K	5320273	5320661	0.999927
12	K	L	0	5320661	0
12	K	M	0	5320661	0
12	K	N	2	5320661	3.75893e-07
12	K	P	0	5320661	0
12	K	Q	0	5320661	0
12	K	R	377	5320661	7.08559e-05
12	K	S	0	5320661	0
12	K	T	0	5320661	0
12	K	V	0	5320661	0
12	K	W	0	5320661	0
12	K	Y	0	5320661	0
13	V	-	3	5321400	5.63761e-07
13	V	A	22	5321400	4.13425e-06
13	V	C	0	5321400	0
13	V	D	0	5321400	0
13	V	E	0	5321400	0
13	V	F	2	5321400	3.75841e-07
13	V	G	1	5321400	1.8792e-07
13	V	H	0	5321400	0
13	V	I	280	5321400	5.26177e-05
13	V	K	1	5321400	1.8792e-07
13	V	L	1	5321400	1.8792e-07
13	V	M	0	5321400	0
13	V	N	0	5321400	0
13	V	P	0	5321400	0
13	V	Q	0	5321400	0
13	V	R	0	5321400	0
13	V	S	1	5321400	1.8792e-07
13	V	T	0	5321400	0
13	V	V	5321089	5321400	0.999942
13	V	W	0	5321400	0
13	V	Y	0	5321400	0
14	E	-	7	5321212	1.31549e-06
14	E	A	0	5321212	0
14	E	C	0	5321212	0
14	E	D	7	5321212	1.31549e-06
14	E	E	5321193	5321212	0.999996
14	E	F	0	5321212	0
14	E	G	1	5321212	1.87927e-07
14	E	H	0	5321212	0
14	E	I	0	5321212	0
14	E	K	0	5321212	0
14	E	L	1	5321212	1.87927e-07
14	E	M	0	5321212	0
14	E	N	0	5321212	0
14	E	P	0	5321212	0
14	E	Q	0	5321212	0
14	E	R	0	5321212	0
14	E	S	1	5321212	1.87927e-07
14	E	T	0	5321212	0
14	E	V	2	5321212	3.75854e-07
14	E	W	0	5321212	0
14	E	Y	0	5321212	0
15	G	-	3	5319896	5.63921e-07
15	G	A	0	5319896	0
15	G	C	1335	5319896	0.000250945
15	G	D	243	5319896	4.56776e-05
15	G	E	0	5319896	0
15	G	F	0	5319896	0
15	G	G	5297164	5319896	0.995727
15	G	H	0	5319896	0
15	G	I	2	5319896	3.75947e-07
15	G	K	0	5319896	0
15	G	L	0	5319896	0
15	G	M	0	5319896	0
15	G	N	0	5319896	0
15	G	P	1	5319896	1.87974e-07
15	G	Q	0	5319896	0
15	G	R	3	5319896	5.63921e-07
15	G	S	21088	5319896	0.00396399
15	G	T	0	5319896	0
15	G	V	57	5319896	1.07145e-05
15	G	W	0	5319896	0
15	G	Y	0	5319896	0
16	C	-	2	5329713	3.75255e-07
16	C	A	0	5329713	0
16	C	C	5329660	5329713	0.99999
16	C	D	0	5329713	0
16	C	E	0	5329713	0
16	C	F	4	5329713	7.50509e-07
16	C	G	2	5329713	3.75255e-07
16	C	H	0	5329713	0
16	C	I	1	5329713	1.87627e-07
16	C	K	0	5329713	0
16	C	L	1	5329713	1.87627e-07
16	C	M	0	5329713	0
16	C	N	0	5329713	0
16	C	P	0	5329713	0
16	C	Q	0	5329713	0
16	C	R	1	5329713	1.87627e-07
16	C	S	41	5329713	7.69272e-06
16	C	T	0	5329713	0
16	C	V	1	5329713	1.87627e-07
16	C	W	0	5329713	0
16	C	Y	0	5329713	0
17	M	-	2	5329796	3.75249e-07
17	M	A	0	5329796	0
17	M	C	0	5329796	0
17	M	D	0	5329796	0
17	M	E	0	5329796	0
17	M	F	0	5329796	0
17	M	G	0	5329796	0
17	M	H	0	5329796	0
17	M	I	2074	5329796	0.000389133
17	M	K	1	5329796	1.87624e-07
17	M	L	1	5329796	1.87624e-07
17	M	M	5326839	5329796	0.999445
17	M	N	0	5329796	0
17	M	P	1	5329796	1.87624e-07
17	M	Q	0	5329796	0
17	M	R	0	5329796	0
17	M	S	0	5329796	0
17	M	T	116	5329796	2.17644e-05
17	M	V	761	5329796	0.000142782
17	M	W	0	5329796	0
17	M	Y	1	5329796	1.87624e-07
18	V	-	2	5329935	3.75239e-07
18	V	A	184	5329935	3.4522e-05
18	V	C	0	5329935	0
18	V	D	0	5329935	0
18	V	E	0	5329935	0
18	V	F	0	5329935	0
18	V	G	0	5329935	0
18	V	H	0	5329935	0
18	V	I	638	5329935	0.000119701
18	V	K	0	5329935	0
18	V	L	116	5329935	2.17639e-05
18	V	M	0	5329935	0
18	V	N	0	5329935	0
18	V	P	0	5329935	0
18	V	Q	0	5329935	0
18	V	R	0	5329935	0
18	V	S	0	5329935	0
18	V	T	0	5329935	0
18	V	V	5328994	5329935	0.999823
18	V	W	1	5329935	1.8762e-07
18	V	Y	0	5329935	0
19	Q	-	7	5329936	1.31334e-06
19	Q	A	0	5329936	0
19	Q	C	0	5329936	0
19	Q	D	0	5329936	0
19	Q	E	0	5329936	0
19	Q	F	0	5329936	0
19	Q	G	0	5329936	0
19	Q	H	43	5329936	8.06764e-06
19	Q	I	0	5329936	0
19	Q	K	10	5329936	1.8762e-06
19	Q	L	0	5329936	0
19	Q	M	0	5329936	0
19	Q	N	0	5329936	0
19	Q	P	0	5329936	0
19	Q	Q	5329840	5329936	0.999982
19	Q	R	34	5329936	6.37906e-06
19	Q	S	0	5329936	0
19	Q	T	0	5329936	0
19	Q	V	1	5329936	1.8762e-07
19	Q	W	0	5329936	0
19	Q	Y	1	5329936	1.8762e-07
20	V	-	3	5329937	5.62858e-07
20	V	A	162	5329937	3.03944e-05
20	V	C	0	5329937	0
20	V	D	0	5329937	0
20	V	E	0	5329937	0
20	V	F	0	5329937	0
20	V	G	0	5329937	0
20	V	H	0	5329937	0
20	V	I	146	5329937	2.73924e-05
20	V	K	0	5329937	0
20	V	L	56	5329937	1.05067e-05
20	V	M	0	5329937	0
20	V	N	0	5329937	0
20	V	P	0	5329937	0
20	V	Q	0	5329937	0
20	V	R	0	5329937	0
20	V	S	1	5329937	1.87619e-07
20	V	T	0	5329937	0
20	V	V	5329569	5329937	0.999931
20	V	W	0	5329937	0
20	V	Y	0	5329937	0
21	T	-	2	5329747	3.75252e-07
21	T	A	73	5329747	1.36967e-05
21	T	C	0	5329747	0
21	T	D	0	5329747	0
21	T	E	0	5329747	0
21	T	F	0	5329747	0
21	T	G	0	5329747	0
21	T	H	0	5329747	0
21	T	I	10658	5329747	0.00199972
21	T	K	0	5329747	0
21	T	L	0	5329747	0
21	T	M	0	5329747	0
21	T	N	42	5329747	7.8803e-06
21	T	P	0	5329747	0
21	T	Q	0	5329747	0
21	T	R	0	5329747	0
21	T	S	4	5329747	7.50505e-07
21	T	T	5318968	5329747	0.997978
21	T	V	0	5329747	0
21	T	W	0	5329747	0
21	T	Y	0	5329747	0
22	C	-	2	5329950	3.75238e-07
22	C	A	0	5329950	0
22	C	C	5329931	5329950	0.999996
22	C	D	0	5329950	0
22	C	E	0	5329950	0
22	C	F	4	5329950	7.50476e-07
22	C	G	1	5329950	1.87619e-07
22	C	H	0	5329950	0
22	C	I	0	5329950	0
22	C	K	0	5329950	0
22	C	L	1	5329950	1.87619e-07
22	C	M	0	5329950	0
22	C	N	0	5329950	0
22	C	P	0	5329950	0
22	C	Q	0	5329950	0
22	C	R	4	5329950	7.50476e-07
22	C	S	4	5329950	7.50476e-07
22	C	T	0	5329950	0
22	C	V	0	5329950	0
22	C	W	1	5329950	1.87619e-07
22	C	Y	2	5329950	3.75238e-07
23	G	-	2	5329928	3.7524e-07
23	G	A	4	5329928	7.50479e-07
23	G	C	33	5329928	6.19145e-06
23	G	D	46	5329928	8.63051e-06
23	G	E	0	5329928	0
23	G	F	0	5329928	0
23	G	G	5329164	5329928	0.999857
23	G	H	0	5329928	0
23	G	I	0	5329928	0
23	G	K	0	5329928	0
23	G	L	0	5329928	0
23	G	M	0	5329928	0
23	G	N	0	5329928	0
23	G	P	0	5329928	0
23	G	Q	0	5329928	0
23	G	R	0	5329928	0
23	G	S	446	5329928	8.36784e-05
23	G	T	0	5329928	0
23	G	V	232	5329928	4.35278e-05
23	G	W	1	5329928	1.8762e-07
23	G	Y	0	5329928	0
24	T	-	2	5329893	3.75242e-07
24	T	A	1225	5329893	0.000229836
24	T	C	0	5329893	0
24	T	D	0	5329893	0
24	T	E	0	5329893	0
24	T	F	0	5329893	0
24	T	G	0	5329893	0
24	T	H	0	5329893	0
24	T	I	1370	5329893	0.000257041
24	T	K	19	5329893	3.5648e-06
24	T	L	0	5329893	0
24	T	M	0	5329893	0
24	T	N	1	5329893	1.87621e-07
24	T	P	0	5329893	0
24	T	Q	0	5329893	0
24	T	R	2	5329893	3.75242e-07
24	T	S	13	5329893	2.43907e-06
24	T	T	5327259	5329893	0.999506
24	T	V	0	5329893	0
24	T	W	0	5329893	0
24	T	Y	2	5329893	3.75242e-07
25	T	-	3	5329921	5.6286e-07
25	T	A	109	5329921	2.04506e-05
25	T	C	0	5329921	0
25	T	D	1	5329921	1.8762e-07
25	T	E	0	5329921	0
25	T	F	0	5329921	0
25	T	G	0	5329921	0
25	T	H	0	5329921	0
25	T	I	504	5329921	9.45605e-05
25	T	K	0	5329921	0
25	T	L	0	5329921	0
25	T	M	0	5329921	0
25	T	N	6	5329921	1.12572e-06
25	T	P	1	5329921	1.8762e-07
25	T	Q	0	5329921	0
25	T	R	0	5329921	0
25	T	S	15	5329921	2.8143e-06
25	T	T	5329282	5329921	0.99988
25	T	V	0	5329921	0
25	T	W	0	5329921	0
25	T	Y	0	5329921	0
26	T	-	3	5329884	5.62864e-07
26	T	A	66	5329884	1.2383e-05
26	T	C	0	5329884	0
26	T	D	0	5329884	0
26	T	E	0	5329884	0
26	T	F	0	5329884	0
26	T	G	0	5329884	0
26	T	H	0	5329884	0
26	T	I	14	5329884	2.6267e-06
26	T	K	1	5329884	1.87621e-07
26	T	L	0	5329884	0
26	T	M	0	5329884	0
26	T	N	0	5329884	0
26	T	P	0	5329884	0
26	T	Q	0	5329884	0
26	T	R	0	5329884	0
26	T	S	1	5329884	1.87621e-07
26	T	T	5329796	5329884	0.999983
26	T	V	0	5329884	0
26	T	W	0	5329884	0
26	T	Y	3	5329884	5.62864e-07
27	L	-	2	5329768	3.75251e-07
27	L	A	0	5329768	0
27	L	C	0	5329768	0
27	L	D	0	5329768	0
27	L	E	0	5329768	0
27	L	F	11	5329768	2.06388e-06
27	L	G	0	5329768	0
27	L	H	0	5329768	0
27	L	I	2	5329768	3.75251e-07
27	L	K	0	5329768	0
27	L	L	5329740	5329768	0.999995
27	L	M	0	5329768	0
27	L	N	0	5329768	0
27	L	P	9	5329768	1.68863e-06
27	L	Q	0	5329768	0
27	L	R	0	5329768	0
27	L	S	0	5329768	0
27	L	T	1	5329768	1.87625e-07
27	L	V	3	5329768	5.62876e-07
27	L	W	0	5329768	0
27	L	Y	0	5329768	0
28	N	-	2	5329296	3.75284e-07
28	N	A	0	5329296	0
28	N	C	0	5329296	0
28	N	D	0	5329296	0
28	N	E	0	5329296	0
28	N	F	0	5329296	0
28	N	G	0	5329296	0
28	N	H	0	5329296	0
28	N	I	2	5329296	3.75284e-07
28	N	K	1	5329296	1.87642e-07
28	N	L	1	5329296	1.87642e-07
28	N	M	0	5329296	0
28	N	N	5329287	5329296	0.999998
28	N	P	0	5329296	0
28	N	Q	0	5329296	0
28	N	R	1	5329296	1.87642e-07
28	N	S	2	5329296	3.75284e-07
28	N	T	0	5329296	0
28	N	V	0	5329296	0
28	N	W	0	5329296	0
28	N	Y	0	5329296	0
29	G	-	5	5329391	9.38194e-07
29	G	A	2	5329391	3.75277e-07
29	G	C	2	5329391	3.75277e-07
29	G	D	1	5329391	1.87639e-07
29	G	E	0	5329391	0
29	G	F	0	5329391	0
29	G	G	5329370	5329391	0.999996
29	G	H	0	5329391	0
29	G	I	0	5329391	0
29	G	K	1	5329391	1.87639e-07
29	G	L	0	5329391	0
29	G	M	0	5329391	0
29	G	N	0	5329391	0
29	G	P	0	5329391	0
29	G	Q	0	5329391	0
29	G	R	0	5329391	0
29	G	S	7	5329391	1.31347e-06
29	G	T	1	5329391	1.87639e-07
29	G	V	2	5329391	3.75277e-07
29	G	W	0	5329391	0
29	G	Y	0	5329391	0
30	L	-	1	5329560	1.87633e-07
30	L	A	0	5329560	0
30	L	C	0	5329560	0
30	L	D	0	5329560	0
30	L	E	0	5329560	0
30	L	F	38	5329560	7.13004e-06
30	L	G	0	5329560	0
30	L	H	0	5329560	0
30	L	I	52	5329560	9.7569e-06
30	L	K	0	5329560	0
30	L	L	5329452	5329560	0.99998
30	L	M	0	5329560	0
30	L	N	0	5329560	0
30	L	P	3	5329560	5.62898e-07
30	L	Q	0	5329560	0
30	L	R	0	5329560	0
30	L	S	0	5329560	0
30	L	T	0	5329560	0
30	L	V	14	5329560	2.62686e-06
30	L	W	0	5329560	0
30	L	Y	0	5329560	0
31	W	-	3	5329474	5.62907e-07
31	W	A	0	5329474	0
31	W	C	6	5329474	1.12581e-06
31	W	D	0	5329474	0
31	W	E	0	5329474	0
31	W	F	2	5329474	3.75272e-07
31	W	G	3	5329474	5.62907e-07
31	W	H	0	5329474	0
31	W	I	0	5329474	0
31	W	K	0	5329474	0
31	W	L	3	5329474	5.62907e-07
31	W	M	0	5329474	0
31	W	N	0	5329474	0
31	W	P	0	5329474	0
31	W	Q	0	5329474	0
31	W	R	5	5329474	9.38179e-07
31	W	S	0	5329474	0
31	W	T	0	5329474	0
31	W	V	0	5329474	0
31	W	W	5329452	5329474	0.999996
31	W	Y	0	5329474	0
32	L	-	0	5329500	0
32	L	A	0	5329500	0
32	L	C	0	5329500	0
32	L	D	0	5329500	0
32	L	E	0	5329500	0
32	L	F	20	5329500	3.7527e-06
32	L	G	1	5329500	1.87635e-07
32	L	H	0	5329500	0
32	L	I	125	5329500	2.34544e-05
32	L	K	0	5329500	0
32	L	L	5329349	5329500	0.999972
32	L	M	0	5329500	0
32	L	N	0	5329500	0
32	L	P	1	5329500	1.87635e-07
32	L	Q	0	5329500	0
32	L	R	0	5329500	0
32	L	S	0	5329500	0
32	L	T	0	5329500	0
32	L	V	2	5329500	3.7527e-07
32	L	W	0	5329500	0
32	L	Y	2	5329500	3.7527e-07
33	D	-	5	5329730	9.38134e-07
33	D	A	91	5329730	1.7074e-05
33	D	C	0	5329730	0
33	D	D	5328645	5329730	0.999796
33	D	E	34	5329730	6.37931e-06
33	D	F	0	5329730	0
33	D	G	764	5329730	0.000143347
33	D	H	3	5329730	5.6288e-07
33	D	I	0	5329730	0
33	D	K	2	5329730	3.75254e-07
33	D	L	1	5329730	1.87627e-07
33	D	M	0	5329730	0
33	D	N	51	5329730	9.56897e-06
33	D	P	0	5329730	0
33	D	Q	0	5329730	0
33	D	R	0	5329730	0
33	D	S	0	5329730	0
33	D	T	1	5329730	1.87627e-07
33	D	V	5	5329730	9.38134e-07
33	D	W	0	5329730	0
33	D	Y	128	5329730	2.40162e-05
34	D	-	3	5329280	5.62928e-07
34	D	A	14	5329280	2.627e-06
34	D	C	0	5329280	0
34	D	D	5328947	5329280	0.999938
34	D	E	31	5329280	5.81692e-06
34	D	F	0	5329280	0
34	D	G	121	5329280	2.27048e-05
34	D	H	6	5329280	1.12586e-06
34	D	I	0	5329280	0
34	D	K	0	5329280	0
34	D	L	2	5329280	3.75285e-07
34	D	M	1	5329280	1.87643e-07
34	D	N	139	5329280	2.60823e-05
34	D	P	0	5329280	0
34	D	Q	0	5329280	0
34	D	R	0	5329280	0
34	D	S	3	5329280	5.62928e-07
34	D	T	0	5329280	0
34	D	V	0	5329280	0
34	D	W	0	5329280	0
34	D	Y	13	5329280	2.43935e-06
35	V	-	4	5329752	7.50504e-07
35	V	A	102	5329752	1.91379e-05
35	V	C	0	5329752	0
35	V	D	0	5329752	0
35	V	E	1	5329752	1.87626e-07
35	V	F	0	5329752	0
35	V	G	0	5329752	0
35	V	H	0	5329752	0
35	V	I	785	5329752	0.000147286
35	V	K	0	5329752	0
35	V	L	171	5329752	3.2084e-05
35	V	M	1	5329752	1.87626e-07
35	V	N	0	5329752	0
35	V	P	0	5329752	0
35	V	Q	0	5329752	0
35	V	R	0	5329752	0
35	V	S	0	5329752	0
35	V	T	1	5329752	1.87626e-07
35	V	V	5328687	5329752	0.9998
35	V	W	0	5329752	0
35	V	Y	0	5329752	0
36	V	-	3	5329815	5.62871e-07
36	V	A	1	5329815	1.87624e-07
36	V	C	0	5329815	0
36	V	D	2	5329815	3.75248e-07
36	V	E	0	5329815	0
36	V	F	2	5329815	3.75248e-07
36	V	G	1	5329815	1.87624e-07
36	V	H	0	5329815	0
36	V	I	115	5329815	2.15767e-05
36	V	K	0	5329815	0
36	V	L	3	5329815	5.62871e-07
36	V	M	0	5329815	0
36	V	N	0	5329815	0
36	V	P	0	5329815	0
36	V	Q	0	5329815	0
36	V	R	0	5329815	0
36	V	S	0	5329815	0
36	V	T	1	5329815	1.87624e-07
36	V	V	5329687	5329815	0.999976
36	V	W	0	5329815	0
36	V	Y	0	5329815	0
37	Y	-	4	5329753	7.50504e-07
37	Y	A	0	5329753	0
37	Y	C	68	5329753	1.27586e-05
37	Y	D	0	5329753	0
37	Y	E	0	5329753	0
37	Y	F	7	5329753	1.31338e-06
37	Y	G	0	5329753	0
37	Y	H	187	5329753	3.50861e-05
37	Y	I	0	5329753	0
37	Y	K	1	5329753	1.87626e-07
37	Y	L	1	5329753	1.87626e-07
37	Y	M	0	5329753	0
37	Y	N	6	5329753	1.12576e-06
37	Y	P	0	5329753	0
37	Y	Q	2	5329753	3.75252e-07
37	Y	R	0	5329753	0
37	Y	S	2	5329753	3.75252e-07
37	Y	T	1	5329753	1.87626e-07
37	Y	V	0	5329753	0
37	Y	W	0	5329753	0
37	Y	Y	5329474	5329753	0.999948
38	C	-	6	5329606	1.12579e-06
38	C	A	1	5329606	1.87631e-07
38	C	C	5329528	5329606	0.999985
38	C	D	0	5329606	0
38	C	E	0	5329606	0
38	C	F	4	5329606	7.50525e-07
38	C	G	24	5329606	4.50315e-06
38	C	H	0	5329606	0
38	C	I	0	5329606	0
38	C	K	0	5329606	0
38	C	L	2	5329606	3.75262e-07
38	C	M	0	5329606	0
38	C	N	0	5329606	0
38	C	P	0	5329606	0
38	C	Q	0	5329606	0
38	C	R	2	5329606	3.75262e-07
38	C	S	34	5329606	6.37946e-06
38	C	T	2	5329606	3.75262e-07
38	C	V	1	5329606	1.87631e-07
38	C	W	0	5329606	0
38	C	Y	2	5329606	3.75262e-07
39	P	-	8	5329412	1.5011e-06
39	P	A	0	5329412	0
39	P	C	0	5329412	0
39	P	D	0	5329412	0
39	P	E	0	5329412	0
39	P	F	0	5329412	0
39	P	G	0	5329412	0
39	P	H	2	5329412	3.75276e-07
39	P	I	0	5329412	0
39	P	K	0	5329412	0
39	P	L	9	5329412	1.68874e-06
39	P	M	0	5329412	0
39	P	N	0	5329412	0
39	P	P	5329384	5329412	0.999995
39	P	Q	2	5329412	3.75276e-07
39	P	R	1	5329412	1.87638e-07
39	P	S	2	5329412	3.75276e-07
39	P	T	3	5329412	5.62914e-07
39	P	V	1	5329412	1.87638e-07
39	P	W	0	5329412	0
39	P	Y	0	5329412	0
40	R	-	10	5329435	1.87637e-06
40	R	A	0	5329435	0
40	R	C	0	5329435	0
40	R	D	1	5329435	1.87637e-07
40	R	E	0	5329435	0
40	R	F	0	5329435	0
40	R	G	0	5329435	0
40	R	H	0	5329435	0
40	R	I	2	5329435	3.75274e-07
40	R	K	1	5329435	1.87637e-07
40	R	L	2	5329435	3.75274e-07
40	R	M	0	5329435	0
40	R	N	0	5329435	0
40	R	P	0	5329435	0
40	R	Q	1	5329435	1.87637e-07
40	R	R	5329414	5329435	0.999996
40	R	S	2	5329435	3.75274e-07
40	R	T	2	5329435	3.75274e-07
40	R	V	0	5329435	0
40	R	W	0	5329435	0
40	R	Y	0	5329435	0
41	H	-	8	5329061	1.5012e-06
41	H	A	0	5329061	0
41	H	C	0	5329061	0
41	H	D	1	5329061	1.8765e-07
41	H	E	0	5329061	0
41	H	F	0	5329061	0
41	H	G	0	5329061	0
41	H	H	5329040	5329061	0.999996
41	H	I	0	5329061	0
41	H	K	0	5329061	0
41	H	L	3	5329061	5.62951e-07
41	H	M	1	5329061	1.8765e-07
41	H	N	0	5329061	0
41	H	P	1	5329061	1.8765e-07
41	H	Q	1	5329061	1.8765e-07
41	H	R	0	5329061	0
41	H	S	1	5329061	1.8765e-07
41	H	T	2	5329061	3.75301e-07
41	H	V	0	5329061	0
41	H	W	0	5329061	0
41	H	Y	3	5329061	5.62951e-07
42	V	-	7	5329058	1.31355e-06
42	V	A	12	5329058	2.25181e-06
42	V	C	0	5329058	0
42	V	D	0	5329058	0
42	V	E	0	5329058	0
42	V	F	0	5329058	0
42	V	G	0	5329058	0
42	V	H	0	5329058	0
42	V	I	1	5329058	1.8765e-07
42	V	K	0	5329058	0
42	V	L	185	5329058	3.47153e-05
42	V	M	6	5329058	1.1259e-06
42	V	N	0	5329058	0
42	V	P	0	5329058	0
42	V	Q	0	5329058	0
42	V	R	0	5329058	0
42	V	S	0	5329058	0
42	V	T	0	5329058	0
42	V	V	5328847	5329058	0.99996
42	V	W	0	5329058	0
42	V	Y	0	5329058	0
43	I	-	6	5329188	1.12588e-06
43	I	A	0	5329188	0
43	I	C	0	5329188	0
43	I	D	0	5329188	0
43	I	E	0	5329188	0
43	I	F	3	5329188	5.62938e-07
43	I	G	0	5329188	0
43	I	H	0	5329188	0
43	I	I	5328543	5329188	0.999879
43	I	K	0	5329188	0
43	I	L	183	5329188	3.43392e-05
43	I	M	2	5329188	3.75292e-07
43	I	N	0	5329188	0
43	I	P	1	5329188	1.87646e-07
43	I	Q	0	5329188	0
43	I	R	0	5329188	0
43	I	S	1	5329188	1.87646e-07
43	I	T	12	5329188	2.25175e-06
43	I	V	437	5329188	8.20012e-05
43	I	W	0	5329188	0
43	I	Y	0	5329188	0
44	C	-	6	5328856	1.12595e-06
44	C	A	0	5328856	0
44	C	C	5328840	5328856	0.999997
44	C	D	0	5328856	0
44	C	E	0	5328856	0
44	C	F	3	5328856	5.62973e-07
44	C	G	2	5328856	3.75315e-07
44	C	H	0	5328856	0
44	C	I	0	5328856	0
44	C	K	0	5328856	0
44	C	L	1	5328856	1.87658e-07
44	C	M	0	5328856	0
44	C	N	0	5328856	0
44	C	P	1	5328856	1.87658e-07
44	C	Q	0	5328856	0
44	C	R	0	5328856	0
44	C	S	3	5328856	5.62973e-07
44	C	T	0	5328856	0
44	C	V	0	5328856	0
44	C	W	0	5328856	0
44	C	Y	0	5328856	0
45	T	-	3	5328926	5.62965e-07
45	T	A	118	5328926	2.21433e-05
45	T	C	0	5328926	0
45	T	D	0	5328926	0
45	T	E	0	5328926	0
45	T	F	0	5328926	0
45	T	G	0	5328926	0
45	T	H	0	5328926	0
45	T	I	1903	5328926	0.000357108
45	T	K	1	5328926	1.87655e-07
45	T	L	2	5328926	3.7531e-07
45	T	M	0	5328926	0
45	T	N	256	5328926	4.80397e-05
45	T	P	2	5328926	3.7531e-07
45	T	Q	0	5328926	0
45	T	R	1	5328926	1.87655e-07
45	T	S	6	5328926	1.12593e-06
45	T	T	5326634	5328926	0.99957
45	T	V	0	5328926	0
45	T	W	0	5328926	0
45	T	Y	0	5328926	0
46	S	-	3	5329809	5.62872e-07
46	S	A	85	5329809	1.5948e-05
46	S	C	6	5329809	1.12574e-06
46	S	D	0	5329809	0
46	S	E	0	5329809	0
46	S	F	1706	5329809	0.000320087
46	S	G	0	5329809	0
46	S	H	0	5329809	0
46	S	I	0	5329809	0
46	S	K	0	5329809	0
46	S	L	2	5329809	3.75248e-07
46	S	M	0	5329809	0
46	S	N	0	5329809	0
46	S	P	304	5329809	5.70377e-05
46	S	Q	0	5329809	0
46	S	R	0	5329809	0
46	S	S	5327655	5329809	0.999596
46	S	T	5	5329809	9.3812e-07
46	S	V	5	5329809	9.3812e-07
46	S	W	0	5329809	0
46	S	Y	38	5329809	7.12971e-06
47	E	-	5	5329873	9.38109e-07
47	E	A	114	5329873	2.13889e-05
47	E	C	0	5329873	0
47	E	D	56	5329873	1.05068e-05
47	E	E	5323278	5329873	0.998763
47	E	F	0	5329873	0
47	E	G	169	5329873	3.17081e-05
47	E	H	0	5329873	0
47	E	I	0	5329873	0
47	E	K	709	5329873	0.000133024
47	E	L	10	5329873	1.87622e-06
47	E	M	0	5329873	0
47	E	N	5501	5329873	0.00103211
47	E	P	0	5329873	0
47	E	Q	11	5329873	2.06384e-06
47	E	R	0	5329873	0
47	E	S	0	5329873	0
47	E	T	0	5329873	0
47	E	V	19	5329873	3.56481e-06
47	E	W	0	5329873	0
47	E	Y	1	5329873	1.87622e-07
48	D	-	3	5329879	5.62865e-07
48	D	A	3	5329879	5.62865e-07
48	D	C	0	5329879	0
48	D	D	5329521	5329879	0.999933
48	D	E	22	5329879	4.12767e-06
48	D	F	0	5329879	0
48	D	G	80	5329879	1.50097e-05
48	D	H	4	5329879	7.50486e-07
48	D	I	1	5329879	1.87622e-07
48	D	K	0	5329879	0
48	D	L	0	5329879	0
48	D	M	0	5329879	0
48	D	N	174	5329879	3.26461e-05
48	D	P	0	5329879	0
48	D	Q	0	5329879	0
48	D	R	0	5329879	0
48	D	S	1	5329879	1.87622e-07
48	D	T	1	5329879	1.87622e-07
48	D	V	1	5329879	1.87622e-07
48	D	W	0	5329879	0
48	D	Y	68	5329879	1.27583e-05
49	M	-	2	5329875	3.75243e-07
49	M	A	0	5329875	0
49	M	C	0	5329875	0
49	M	D	0	5329875	0
49	M	E	0	5329875	0
49	M	F	0	5329875	0
49	M	G	0	5329875	0
49	M	H	0	5329875	0
49	M	I	1335	5329875	0.000250475
49	M	K	5	5329875	9.38108e-07
49	M	L	34	5329875	6.37914e-06
49	M	M	5328396	5329875	0.999723
49	M	N	0	5329875	0
49	M	P	0	5329875	0
49	M	Q	0	5329875	0
49	M	R	1	5329875	1.87622e-07
49	M	S	1	5329875	1.87622e-07
49	M	T	65	5329875	1.21954e-05
49	M	V	35	5329875	6.56676e-06
49	M	W	1	5329875	1.87622e-07
49	M	Y	0	5329875	0
50	L	-	5	5329661	9.38146e-07
50	L	A	0	5329661	0
50	L	C	0	5329661	0
50	L	D	0	5329661	0
50	L	E	0	5329661	0
50	L	F	2979	5329661	0.000558947
50	L	G	0	5329661	0
50	L	H	1	5329661	1.87629e-07
50	L	I	13	5329661	2.43918e-06
50	L	K	1	5329661	1.87629e-07
50	L	L	5326625	5329661	0.99943
50	L	M	0	5329661	0
50	L	N	0	5329661	0
50	L	P	4	5329661	7.50517e-07
50	L	Q	0	5329661	0
50	L	R	8	5329661	1.50103e-06
50	L	S	5	5329661	9.38146e-07
50	L	T	0	5329661	0
50	L	V	20	5329661	3.75258e-06
50	L	W	0	5329661	0
50	L	Y	0	5329661	0
51	N	-	4	5329780	7.505e-07
51	N	A	4	5329780	7.505e-07
51	N	C	0	5329780	0
51	N	D	10	5329780	1.87625e-06
51	N	E	0	5329780	0
51	N	F	0	5329780	0
51	N	G	0	5329780	0
51	N	H	0	5329780	0
51	N	I	1	5329780	1.87625e-07
51	N	K	24	5329780	4.503e-06
51	N	L	0	5329780	0
51	N	M	0	5329780	0
51	N	N	5329595	5329780	0.999965
51	N	P	0	5329780	0
51	N	Q	0	5329780	0
51	N	R	0	5329780	0
51	N	S	136	5329780	2.5517e-05
51	N	T	5	5329780	9.38125e-07
51	N	V	0	5329780	0
51	N	W	0	5329780	0
51	N	Y	1	5329780	1.87625e-07
52	P	-	6	5329856	1.12573e-06
52	P	A	0	5329856	0
52	P	C	0	5329856	0
52	P	D	0	5329856	0
52	P	E	0	5329856	0
52	P	F	0	5329856	0
52	P	G	0	5329856	0
52	P	H	4	5329856	7.50489e-07
52	P	I	0	5329856	0
52	P	K	0	5329856	0
52	P	L	20	5329856	3.75245e-06
52	P	M	0	5329856	0
52	P	N	0	5329856	0
52	P	P	5329794	5329856	0.999988
52	P	Q	0	5329856	0
52	P	R	0	5329856	0
52	P	S	30	5329856	5.62867e-06
52	P	T	1	5329856	1.87622e-07
52	P	V	0	5329856	0
52	P	W	0	5329856	0
52	P	Y	1	5329856	1.87622e-07
53	N	-	7	5329902	1.31334e-06
53	N	A	0	5329902	0
53	N	C	0	5329902	0
53	N	D	23	5329902	4.31528e-06
53	N	E	0	5329902	0
53	N	F	0	5329902	0
53	N	G	1	5329902	1.87621e-07
53	N	H	3	5329902	5.62862e-07
53	N	I	0	5329902	0
53	N	K	8	5329902	1.50097e-06
53	N	L	2	5329902	3.75241e-07
53	N	M	0	5329902	0
53	N	N	5329837	5329902	0.999988
53	N	P	0	5329902	0
53	N	Q	0	5329902	0
53	N	R	0	5329902	0
53	N	S	15	5329902	2.81431e-06
53	N	T	6	5329902	1.12572e-06
53	N	V	0	5329902	0
53	N	W	0	5329902	0
53	N	Y	0	5329902	0
54	Y	-	8	5329925	1.50096e-06
54	Y	A	0	5329925	0
54	Y	C	3	5329925	5.6286e-07
54	Y	D	0	5329925	0
54	Y	E	0	5329925	0
54	Y	F	1	5329925	1.8762e-07
54	Y	G	0	5329925	0
54	Y	H	0	5329925	0
54	Y	I	0	5329925	0
54	Y	K	2	5329925	3.7524e-07
54	Y	L	0	5329925	0
54	Y	M	0	5329925	0
54	Y	N	0	5329925	0
54	Y	P	0	5329925	0
54	Y	Q	1	5329925	1.8762e-07
54	Y	R	0	5329925	0
54	Y	S	0	5329925	0
54	Y	T	0	5329925	0
54	Y	V	0	5329925	0
54	Y	W	0	5329925	0
54	Y	Y	5329910	5329925	0.999997
55	E	-	7	5329908	1.31334e-06
55	E	A	1	5329908	1.8762e-07
55	E	C	0	5329908	0
55	E	D	83	5329908	1.55725e-05
55	E	E	5329805	5329908	0.999981
55	E	F	0	5329908	0
55	E	G	2	5329908	3.75241e-07
55	E	H	0	5329908	0
55	E	I	0	5329908	0
55	E	K	1	5329908	1.8762e-07
55	E	L	2	5329908	3.75241e-07
55	E	M	0	5329908	0
55	E	N	0	5329908	0
55	E	P	0	5329908	0
55	E	Q	1	5329908	1.8762e-07
55	E	R	0	5329908	0
55	E	S	1	5329908	1.8762e-07
55	E	T	2	5329908	3.75241e-07
55	E	V	2	5329908	3.75241e-07
55	E	W	0	5329908	0
55	E	Y	1	5329908	1.8762e-07
56	D	-	6	5329879	1.12573e-06
56	D	A	0	5329879	0
56	D	C	3	5329879	5.62865e-07
56	D	D	5329821	5329879	0.999989
56	D	E	6	5329879	1.12573e-06
56	D	F	0	5329879	0
56	D	G	0	5329879	0
56	D	H	0	5329879	0
56	D	I	0	5329879	0
56	D	K	0	5329879	0
56	D	L	0	5329879	0
56	D	M	0	5329879	0
56	D	N	32	5329879	6.00389e-06
56	D	P	0	5329879	0
56	D	Q	0	5329879	0
56	D	R	0	5329879	0
56	D	S	1	5329879	1.87622e-07
56	D	T	3	5329879	5.62865e-07
56	D	V	3	5329879	5.62865e-07
56	D	W	0	5329879	0
56	D	Y	4	5329879	7.50486e-07
57	L	-	3	5329883	5.62864e-07
57	L	A	1	5329883	1.87621e-07
57	L	C	0	5329883	0
57	L	D	0	5329883	0
57	L	E	0	5329883	0
57	L	F	1	5329883	1.87621e-07
57	L	G	0	5329883	0
57	L	H	0	5329883	0
57	L	I	4	5329883	7.50486e-07
57	L	K	0	5329883	0
57	L	L	5329857	5329883	0.999995
57	L	M	0	5329883	0
57	L	N	0	5329883	0
57	L	P	0	5329883	0
57	L	Q	0	5329883	0
57	L	R	0	5329883	0
57	L	S	16	5329883	3.00194e-06
57	L	T	0	5329883	0
57	L	V	0	5329883	0
57	L	W	0	5329883	0
57	L	Y	1	5329883	1.87621e-07
58	L	-	3	5329865	5.62866e-07
58	L	A	0	5329865	0
58	L	C	0	5329865	0
58	L	D	0	5329865	0
58	L	E	1	5329865	1.87622e-07
58	L	F	347	5329865	6.51048e-05
58	L	G	3	5329865	5.62866e-07
58	L	H	0	5329865	0
58	L	I	13	5329865	2.43909e-06
58	L	K	0	5329865	0
58	L	L	5329495	5329865	0.999931
58	L	M	0	5329865	0
58	L	N	0	5329865	0
58	L	P	2	5329865	3.75244e-07
58	L	Q	0	5329865	0
58	L	R	1	5329865	1.87622e-07
58	L	S	0	5329865	0
58	L	T	0	5329865	0
58	L	V	0	5329865	0
58	L	W	0	5329865	0
58	L	Y	0	5329865	0
59	I	-	1	5329833	1.87623e-07
59	I	A	0	5329833	0
59	I	C	0	5329833	0
59	I	D	0	5329833	0
59	I	E	0	5329833	0
59	I	F	3	5329833	5.62869e-07
59	I	G	0	5329833	0
59	I	H	0	5329833	0
59	I	I	5329645	5329833	0.999965
59	I	K	0	5329833	0
59	I	L	22	5329833	4.12771e-06
59	I	M	11	5329833	2.06385e-06
59	I	N	1	5329833	1.87623e-07
59	I	P	1	5329833	1.87623e-07
59	I	Q	0	5329833	0
59	I	R	0	5329833	0
59	I	S	3	5329833	5.62869e-07
59	I	T	4	5329833	7.50493e-07
59	I	V	142	5329833	2.66425e-05
59	I	W	0	5329833	0
59	I	Y	0	5329833	0
60	R	-	2	5329370	3.75279e-07
60	R	A	0	5329370	0
60	R	C	910	5329370	0.000170752
60	R	D	0	5329370	0
60	R	E	0	5329370	0
60	R	F	0	5329370	0
60	R	G	1	5329370	1.87639e-07
60	R	H	0	5329370	0
60	R	I	2	5329370	3.75279e-07
60	R	K	6	5329370	1.12584e-06
60	R	L	887	5329370	0.000166436
60	R	M	0	5329370	0
60	R	N	0	5329370	0
60	R	P	0	5329370	0
60	R	Q	0	5329370	0
60	R	R	5327560	5329370	0.99966
60	R	S	2	5329370	3.75279e-07
60	R	T	0	5329370	0
60	R	V	0	5329370	0
60	R	W	0	5329370	0
60	R	Y	0	5329370	0
61	K	-	5	5329604	9.38156e-07
61	K	A	0	5329604	0
61	K	C	0	5329604	0
61	K	D	0	5329604	0
61	K	E	0	5329604	0
61	K	F	2	5329604	3.75262e-07
61	K	G	0	5329604	0
61	K	H	0	5329604	0
61	K	I	6	5329604	1.12579e-06
61	K	K	5329227	5329604	0.999929
61	K	L	0	5329604	0
61	K	M	1	5329604	1.87631e-07
61	K	N	1	5329604	1.87631e-07
61	K	P	0	5329604	0
61	K	Q	0	5329604	0
61	K	R	362	5329604	6.79225e-05
61	K	S	0	5329604	0
61	K	T	0	5329604	0
61	K	V	0	5329604	0
61	K	W	0	5329604	0
61	K	Y	0	5329604	0
62	S	-	1	5329857	1.87622e-07
62	S	A	9	5329857	1.6886e-06
62	S	C	4	5329857	7.50489e-07
62	S	D	0	5329857	0
62	S	E	0	5329857	0
62	S	F	12	5329857	2.25147e-06
62	S	G	0	5329857	0
62	S	H	0	5329857	0
62	S	I	0	5329857	0
62	S	K	0	5329857	0
62	S	L	0	5329857	0
62	S	M	0	5329857	0
62	S	N	1	5329857	1.87622e-07
62	S	P	3	5329857	5.62867e-07
62	S	Q	0	5329857	0
62	S	R	0	5329857	0
62	S	S	5329815	5329857	0.999992
62	S	T	3	5329857	5.62867e-07
62	S	V	0	5329857	0
62	S	W	0	5329857	0
62	S	Y	9	5329857	1.6886e-06
63	N	-	1	5329913	1.8762e-07
63	N	A	0	5329913	0
63	N	C	0	5329913	0
63	N	D	0	5329913	0
63	N	E	0	5329913	0
63	N	F	0	5329913	0
63	N	G	1	5329913	1.8762e-07
63	N	H	0	5329913	0
63	N	I	1	5329913	1.8762e-07
63	N	K	0	5329913	0
63	N	L	1	5329913	1.8762e-07
63	N	M	0	5329913	0
63	N	N	5329900	5329913	0.999998
63	N	P	0	5329913	0
63	N	Q	0	5329913	0
63	N	R	0	5329913	0
63	N	S	7	5329913	1.31334e-06
63	N	T	0	5329913	0
63	N	V	0	5329913	0
63	N	W	0	5329913	0
63	N	Y	2	5329913	3.75241e-07
64	H	-	1	5329880	1.87621e-07
64	H	A	0	5329880	0
64	H	C	0	5329880	0
64	H	D	1	5329880	1.87621e-07
64	H	E	0	5329880	0
64	H	F	6	5329880	1.12573e-06
64	H	G	0	5329880	0
64	H	H	5329782	5329880	0.999982
64	H	I	0	5329880	0
64	H	K	0	5329880	0
64	H	L	0	5329880	0
64	H	M	0	5329880	0
64	H	N	13	5329880	2.43908e-06
64	H	P	0	5329880	0
64	H	Q	2	5329880	3.75243e-07
64	H	R	0	5329880	0
64	H	S	2	5329880	3.75243e-07
64	H	T	0	5329880	0
64	H	V	0	5329880	0
64	H	W	0	5329880	0
64	H	Y	73	5329880	1.36964e-05
65	N	-	2	5329894	3.75242e-07
65	N	A	0	5329894	0
65	N	C	0	5329894	0
65	N	D	2	5329894	3.75242e-07
65	N	E	0	5329894	0
65	N	F	0	5329894	0
65	N	G	0	5329894	0
65	N	H	10	5329894	1.87621e-06
65	N	I	0	5329894	0
65	N	K	2	5329894	3.75242e-07
65	N	L	0	5329894	0
65	N	M	0	5329894	0
65	N	N	5329385	5329894	0.999905
65	N	P	0	5329894	0
65	N	Q	0	5329894	0
65	N	R	0	5329894	0
65	N	S	474	5329894	8.89324e-05
65	N	T	0	5329894	0
65	N	V	8	5329894	1.50097e-06
65	N	W	0	5329894	0
65	N	Y	11	5329894	2.06383e-06
66	F	-	0	5329864	0
66	F	A	0	5329864	0
66	F	C	1	5329864	1.87622e-07
66	F	D	0	5329864	0
66	F	E	0	5329864	0
66	F	F	5329847	5329864	0.999997
66	F	G	0	5329864	0
66	F	H	0	5329864	0
66	F	I	0	5329864	0
66	F	K	0	5329864	0
66	F	L	5	5329864	9.3811e-07
66	F	M	0	5329864	0
66	F	N	0	5329864	0
66	F	P	0	5329864	0
66	F	Q	0	5329864	0
66	F	R	0	5329864	0
66	F	S	11	5329864	2.06384e-06
66	F	T	0	5329864	0
66	F	V	0	5329864	0
66	F	W	0	5329864	0
66	F	Y	0	5329864	0
67	L	-	0	5329823	0
67	L	A	0	5329823	0
67	L	C	0	5329823	0
67	L	D	0	5329823	0
67	L	E	0	5329823	0
67	L	F	1282	5329823	0.000240533
67	L	G	0	5329823	0
67	L	H	0	5329823	0
67	L	I	0	5329823	0
67	L	K	0	5329823	0
67	L	L	5328063	5329823	0.99967
67	L	M	3	5329823	5.6287e-07
67	L	N	0	5329823	0
67	L	P	0	5329823	0
67	L	Q	0	5329823	0
67	L	R	0	5329823	0
67	L	S	425	5329823	7.974e-05
67	L	T	0	5329823	0
67	L	V	45	5329823	8.44306e-06
67	L	W	5	5329823	9.38117e-07
67	L	Y	0	5329823	0
68	V	-	0	5329928	0
68	V	A	21	5329928	3.94002e-06
68	V	C	0	5329928	0
68	V	D	0	5329928	0
68	V	E	0	5329928	0
68	V	F	0	5329928	0
68	V	G	0	5329928	0
68	V	H	0	5329928	0
68	V	I	250	5329928	4.69049e-05
68	V	K	0	5329928	0
68	V	L	68	5329928	1.27581e-05
68	V	M	0	5329928	0
68	V	N	0	5329928	0
68	V	P	0	5329928	0
68	V	Q	0	5329928	0
68	V	R	0	5329928	0
68	V	S	0	5329928	0
68	V	T	0	5329928	0
68	V	V	5329589	5329928	0.999936
68	V	W	0	5329928	0
68	V	Y	0	5329928	0
69	Q	-	7	5329862	1.31335e-06
69	Q	A	0	5329862	0
69	Q	C	0	5329862	0
69	Q	D	0	5329862	0
69	Q	E	54	5329862	1.01316e-05
69	Q	F	0	5329862	0
69	Q	G	2	5329862	3.75244e-07
69	Q	H	231	5329862	4.33407e-05
69	Q	I	5	5329862	9.38111e-07
69	Q	K	6	5329862	1.12573e-06
69	Q	L	8	5329862	1.50098e-06
69	Q	M	2	5329862	3.75244e-07
69	Q	N	0	5329862	0
69	Q	P	0	5329862	0
69	Q	Q	5329274	5329862	0.99989
69	Q	R	271	5329862	5.08456e-05
69	Q	S	0	5329862	0
69	Q	T	0	5329862	0
69	Q	V	1	5329862	1.87622e-07
69	Q	W	1	5329862	1.87622e-07
69	Q	Y	0	5329862	0
70	A	-	0	5329862	0
70	A	A	5327918	5329862	0.999635
70	A	C	0	5329862	0
70	A	D	31	5329862	5.81629e-06
70	A	E	0	5329862	0
70	A	F	0	5329862	0
70	A	G	0	5329862	0
70	A	H	0	5329862	0
70	A	I	5	5329862	9.38111e-07
70	A	K	0	5329862	0
70	A	L	0	5329862	0
70	A	M	0	5329862	0
70	A	N	0	5329862	0
70	A	P	2	5329862	3.75244e-07
70	A	Q	0	5329862	0
70	A	R	0	5329862	0
70	A	S	175	5329862	3.28339e-05
70	A	T	436	5329862	8.18032e-05
70	A	V	1295	5329862	0.000242971
70	A	W	0	5329862	0
70	A	Y	0	5329862	0
71	G	-	3	5329364	5.62919e-07
71	G	A	0	5329364	0
71	G	C	63	5329364	1.18213e-05
71	G	D	135	5329364	2.53314e-05
71	G	E	1	5329364	1.8764e-07
71	G	F	0	5329364	0
71	G	G	5323502	5329364	0.9989
71	G	H	0	5329364	0
71	G	I	0	5329364	0
71	G	K	0	5329364	0
71	G	L	0	5329364	0
71	G	M	0	5329364	0
71	G	N	0	5329364	0
71	G	P	0	5329364	0
71	G	Q	0	5329364	0
71	G	R	5	5329364	9.38198e-07
71	G	S	5447	5329364	0.00102207
71	G	T	0	5329364	0
71	G	V	208	5329364	3.9029e-05
71	G	W	0	5329364	0
71	G	Y	0	5329364	0
72	N	-	1	5329932	1.8762e-07
72	N	A	0	5329932	0
72	N	C	0	5329932	0
72	N	D	17	5329932	3.18953e-06
72	N	E	0	5329932	0
72	N	F	0	5329932	0
72	N	G	0	5329932	0
72	N	H	4	5329932	7.50479e-07
72	N	I	3	5329932	5.62859e-07
72	N	K	12	5329932	2.25144e-06
72	N	L	0	5329932	0
72	N	M	0	5329932	0
72	N	N	5329606	5329932	0.999939
72	N	P	0	5329932	0
72	N	Q	0	5329932	0
72	N	R	0	5329932	0
72	N	S	244	5329932	4.57792e-05
72	N	T	21	5329932	3.94001e-06
72	N	V	0	5329932	0
72	N	W	7	5329932	1.31334e-06
72	N	Y	17	5329932	3.18953e-06
73	V	-	0	5329913	0
73	V	A	29	5329913	5.44099e-06
73	V	C	2	5329913	3.75241e-07
73	V	D	1	5329913	1.8762e-07
73	V	E	0	5329913	0
73	V	F	78	5329913	1.46344e-05
73	V	G	0	5329913	0
73	V	H	0	5329913	0
73	V	I	7308	5329913	0.00137113
73	V	K	0	5329913	0
73	V	L	2	5329913	3.75241e-07
73	V	M	11	5329913	2.06382e-06
73	V	N	0	5329913	0
73	V	P	0	5329913	0
73	V	Q	0	5329913	0
73	V	R	0	5329913	0
73	V	S	0	5329913	0
73	V	T	0	5329913	0
73	V	V	5322477	5329913	0.998605
73	V	W	0	5329913	0
73	V	Y	5	5329913	9.38102e-07
74	Q	-	4	5329907	7.50482e-07
74	Q	A	0	5329907	0
74	Q	C	0	5329907	0
74	Q	D	0	5329907	0
74	Q	E	2	5329907	3.75241e-07
74	Q	F	0	5329907	0
74	Q	G	0	5329907	0
74	Q	H	46	5329907	8.63054e-06
74	Q	I	0	5329907	0
74	Q	K	2	5329907	3.75241e-07
74	Q	L	4	5329907	7.50482e-07
74	Q	M	0	5329907	0
74	Q	N	0	5329907	0
74	Q	P	15	5329907	2.81431e-06
74	Q	Q	5329816	5329907	0.999983
74	Q	R	16	5329907	3.00193e-06
74	Q	S	2	5329907	3.75241e-07
74	Q	T	0	5329907	0
74	Q	V	0	5329907	0
74	Q	W	0	5329907	0
74	Q	Y	0	5329907	0
75	L	-	2	5329751	3.75252e-07
75	L	A	0	5329751	0
75	L	C	0	5329751	0
75	L	D	0	5329751	0
75	L	E	0	5329751	0
75	L	F	6608	5329751	0.00123983
75	L	G	0	5329751	0
75	L	H	4	5329751	7.50504e-07
75	L	I	1374	5329751	0.000257798
75	L	K	0	5329751	0
75	L	L	5321699	5329751	0.998489
75	L	M	0	5329751	0
75	L	N	0	5329751	0
75	L	P	8	5329751	1.50101e-06
75	L	Q	0	5329751	0
75	L	R	28	5329751	5.25353e-06
75	L	S	0	5329751	0
75	L	T	2	5329751	3.75252e-07
75	L	V	26	5329751	4.87828e-06
75	L	W	0	5329751	0
75	L	Y	0	5329751	0
76	R	-	1	5329842	1.87623e-07
76	R	A	0	5329842	0
76	R	C	0	5329842	0
76	R	D	0	5329842	0
76	R	E	0	5329842	0
76	R	F	0	5329842	0
76	R	G	1	5329842	1.87623e-07
76	R	H	0	5329842	0
76	R	I	0	5329842	0
76	R	K	151	5329842	2.8331e-05
76	R	L	0	5329842	0
76	R	M	71	5329842	1.33212e-05
76	R	N	0	5329842	0
76	R	P	0	5329842	0
76	R	Q	2	5329842	3.75246e-07
76	R	R	5329384	5329842	0.999914
76	R	S	224	5329842	4.20275e-05
76	R	T	2	5329842	3.75246e-07
76	R	V	4	5329842	7.50491e-07
76	R	W	2	5329842	3.75246e-07
76	R	Y	0	5329842	0
77	V	-	1	5329925	1.8762e-07
77	V	A	39	5329925	7.31718e-06
77	V	C	0	5329925	0
77	V	D	1	5329925	1.8762e-07
77	V	E	0	5329925	0
77	V	F	4	5329925	7.5048e-07
77	V	G	0	5329925	0
77	V	H	0	5329925	0
77	V	I	239	5329925	4.48412e-05
77	V	K	0	5329925	0
77	V	L	22	5329925	4.12764e-06
77	V	M	4	5329925	7.5048e-07
77	V	N	0	5329925	0
77	V	P	0	5329925	0
77	V	Q	1	5329925	1.8762e-07
77	V	R	0	5329925	0
77	V	S	0	5329925	0
77	V	T	0	5329925	0
77	V	V	5329614	5329925	0.999942
77	V	W	0	5329925	0
77	V	Y	0	5329925	0
78	I	-	1	5329818	1.87624e-07
78	I	A	0	5329818	0
78	I	C	0	5329818	0
78	I	D	0	5329818	0
78	I	E	0	5329818	0
78	I	F	5	5329818	9.38118e-07
78	I	G	0	5329818	0
78	I	H	0	5329818	0
78	I	I	5327710	5329818	0.999604
78	I	K	0	5329818	0
78	I	L	27	5329818	5.06584e-06
78	I	M	9	5329818	1.68861e-06
78	I	N	20	5329818	3.75247e-06
78	I	P	0	5329818	0
78	I	Q	0	5329818	0
78	I	R	0	5329818	0
78	I	S	346	5329818	6.49178e-05
78	I	T	410	5329818	7.69257e-05
78	I	V	1290	5329818	0.000242035
78	I	W	0	5329818	0
78	I	Y	0	5329818	0
79	G	-	1	5329874	1.87622e-07
79	G	A	0	5329874	0
79	G	C	0	5329874	0
79	G	D	1	5329874	1.87622e-07
79	G	E	1	5329874	1.87622e-07
79	G	F	0	5329874	0
79	G	G	5329855	5329874	0.999996
79	G	H	0	5329874	0
79	G	I	0	5329874	0
79	G	K	0	5329874	0
79	G	L	1	5329874	1.87622e-07
79	G	M	0	5329874	0
79	G	N	4	5329874	7.50487e-07
79	G	P	0	5329874	0
79	G	Q	0	5329874	0
79	G	R	8	5329874	1.50097e-06
79	G	S	0	5329874	0
79	G	T	0	5329874	0
79	G	V	3	5329874	5.62865e-07
79	G	W	0	5329874	0
79	G	Y	0	5329874	0
80	H	-	1	5329894	1.87621e-07
80	H	A	0	5329894	0
80	H	C	0	5329894	0
80	H	D	0	5329894	0
80	H	E	0	5329894	0
80	H	F	0	5329894	0
80	H	G	0	5329894	0
80	H	H	5329719	5329894	0.999967
80	H	I	1	5329894	1.87621e-07
80	H	K	0	5329894	0
80	H	L	1	5329894	1.87621e-07
80	H	M	0	5329894	0
80	H	N	81	5329894	1.51973e-05
80	H	P	0	5329894	0
80	H	Q	6	5329894	1.12573e-06
80	H	R	13	5329894	2.43907e-06
80	H	S	4	5329894	7.50484e-07
80	H	T	0	5329894	0
80	H	V	0	5329894	0
80	H	W	0	5329894	0
80	H	Y	68	5329894	1.27582e-05
81	S	-	1	5329861	1.87622e-07
81	S	A	487	5329861	9.1372e-05
81	S	C	12	5329861	2.25147e-06
81	S	D	0	5329861	0
81	S	E	0	5329861	0
81	S	F	1182	5329861	0.000221769
81	S	G	4	5329861	7.50489e-07
81	S	H	0	5329861	0
81	S	I	0	5329861	0
81	S	K	0	5329861	0
81	S	L	1	5329861	1.87622e-07
81	S	M	0	5329861	0
81	S	N	0	5329861	0
81	S	P	4	5329861	7.50489e-07
81	S	Q	0	5329861	0
81	S	R	0	5329861	0
81	S	S	5328142	5329861	0.999677
81	S	T	6	5329861	1.12573e-06
81	S	V	0	5329861	0
81	S	W	0	5329861	0
81	S	Y	22	5329861	4.12769e-06
82	M	-	1	5329895	1.87621e-07
82	M	A	0	5329895	0
82	M	C	1	5329895	1.87621e-07
82	M	D	0	5329895	0
82	M	E	0	5329895	0
82	M	F	0	5329895	0
82	M	G	0	5329895	0
82	M	H	0	5329895	0
82	M	I	669	5329895	0.000125518
82	M	K	0	5329895	0
82	M	L	5	5329895	9.38105e-07
82	M	M	5329182	5329895	0.999866
82	M	N	0	5329895	0
82	M	P	0	5329895	0
82	M	Q	0	5329895	0
82	M	R	0	5329895	0
82	M	S	0	5329895	0
82	M	T	16	5329895	3.00194e-06
82	M	V	21	5329895	3.94004e-06
82	M	W	0	5329895	0
82	M	Y	0	5329895	0
83	Q	-	8	5329791	1.501e-06
83	Q	A	0	5329791	0
83	Q	C	0	5329791	0
83	Q	D	0	5329791	0
83	Q	E	0	5329791	0
83	Q	F	0	5329791	0
83	Q	G	0	5329791	0
83	Q	H	1028	5329791	0.000192878
83	Q	I	0	5329791	0
83	Q	K	1982	5329791	0.000371872
83	Q	L	58	5329791	1.08822e-05
83	Q	M	0	5329791	0
83	Q	N	0	5329791	0
83	Q	P	2	5329791	3.75249e-07
83	Q	Q	5326675	5329791	0.999415
83	Q	R	38	5329791	7.12974e-06
83	Q	S	0	5329791	0
83	Q	T	0	5329791	0
83	Q	V	0	5329791	0
83	Q	W	0	5329791	0
83	Q	Y	0	5329791	0
84	N	-	2	5329910	3.75241e-07
84	N	A	0	5329910	0
84	N	C	0	5329910	0
84	N	D	49	5329910	9.1934e-06
84	N	E	0	5329910	0
84	N	F	0	5329910	0
84	N	G	0	5329910	0
84	N	H	39	5329910	7.3172e-06
84	N	I	11	5329910	2.06382e-06
84	N	K	108	5329910	2.0263e-05
84	N	L	0	5329910	0
84	N	M	0	5329910	0
84	N	N	5329446	5329910	0.999913
84	N	P	0	5329910	0
84	N	Q	0	5329910	0
84	N	R	0	5329910	0
84	N	S	239	5329910	4.48413e-05
84	N	T	6	5329910	1.12572e-06
84	N	V	0	5329910	0
84	N	W	0	5329910	0
84	N	Y	10	5329910	1.8762e-06
85	C	-	1	5329908	1.8762e-07
85	C	A	0	5329908	0
85	C	C	5329891	5329908	0.999997
85	C	D	0	5329908	0
85	C	E	0	5329908	0
85	C	F	3	5329908	5.62861e-07
85	C	G	0	5329908	0
85	C	H	0	5329908	0
85	C	I	3	5329908	5.62861e-07
85	C	K	0	5329908	0
85	C	L	2	5329908	3.75241e-07
85	C	M	0	5329908	0
85	C	N	0	5329908	0
85	C	P	0	5329908	0
85	C	Q	0	5329908	0
85	C	R	2	5329908	3.75241e-07
85	C	S	3	5329908	5.62861e-07
85	C	T	0	5329908	0
85	C	V	1	5329908	1.8762e-07
85	C	W	1	5329908	1.8762e-07
85	C	Y	1	5329908	1.8762e-07
86	V	-	1	5329936	1.8762e-07
86	V	A	257	5329936	4.82182e-05
86	V	C	1	5329936	1.8762e-07
86	V	D	0	5329936	0
86	V	E	14	5329936	2.62667e-06
86	V	F	0	5329936	0
86	V	G	0	5329936	0
86	V	H	0	5329936	0
86	V	I	559	5329936	0.000104879
86	V	K	1	5329936	1.8762e-07
86	V	L	41	5329936	7.6924e-06
86	V	M	0	5329936	0
86	V	N	0	5329936	0
86	V	P	0	5329936	0
86	V	Q	0	5329936	0
86	V	R	0	5329936	0
86	V	S	0	5329936	0
86	V	T	1	5329936	1.8762e-07
86	V	V	5329060	5329936	0.999836
86	V	W	0	5329936	0
86	V	Y	1	5329936	1.8762e-07
87	L	-	2	5329903	3.75241e-07
87	L	A	1	5329903	1.87621e-07
87	L	C	3	5329903	5.62862e-07
87	L	D	0	5329903	0
87	L	E	0	5329903	0
87	L	F	242	5329903	4.54042e-05
87	L	G	0	5329903	0
87	L	H	0	5329903	0
87	L	I	81	5329903	1.51973e-05
87	L	K	0	5329903	0
87	L	L	5329573	5329903	0.999938
87	L	M	0	5329903	0
87	L	N	0	5329903	0
87	L	P	0	5329903	0
87	L	Q	0	5329903	0
87	L	R	0	5329903	0
87	L	S	0	5329903	0
87	L	T	0	5329903	0
87	L	V	1	5329903	1.87621e-07
87	L	W	0	5329903	0
87	L	Y	0	5329903	0
88	K	-	3	5329549	5.62899e-07
88	K	A	0	5329549	0
88	K	C	0	5329549	0
88	K	D	0	5329549	0
88	K	E	4	5329549	7.50533e-07
88	K	F	0	5329549	0
88	K	G	3	5329549	5.62899e-07
88	K	H	0	5329549	0
88	K	I	0	5329549	0
88	K	K	5316673	5329549	0.997584
88	K	L	0	5329549	0
88	K	M	2	5329549	3.75266e-07
88	K	N	320	5329549	6.00426e-05
88	K	P	0	5329549	0
88	K	Q	6	5329549	1.1258e-06
88	K	R	12516	5329549	0.00234842
88	K	S	1	5329549	1.87633e-07
88	K	T	20	5329549	3.75266e-06
88	K	V	1	5329549	1.87633e-07
88	K	W	0	5329549	0
88	K	Y	0	5329549	0
89	L	-	1	5325693	1.87769e-07
89	L	A	0	5325693	0
89	L	C	0	5325693	0
89	L	D	0	5325693	0
89	L	E	0	5325693	0
89	L	F	131160	5325693	0.0246278
89	L	G	0	5325693	0
89	L	H	0	5325693	0
89	L	I	9	5325693	1.68992e-06
89	L	K	0	5325693	0
89	L	L	5194518	5325693	0.975369
89	L	M	0	5325693	0
89	L	N	0	5325693	0
89	L	P	2	5325693	3.75538e-07
89	L	Q	0	5325693	0
89	L	R	0	5325693	0
89	L	S	0	5325693	0
89	L	T	0	5325693	0
89	L	V	1	5325693	1.87769e-07
89	L	W	0	5325693	0
89	L	Y	2	5325693	3.75538e-07
90	K	-	0	5327197	0
90	K	A	0	5327197	0
90	K	C	0	5327197	0
90	K	D	0	5327197	0
90	K	E	0	5327197	0
90	K	F	0	5327197	0
90	K	G	5	5327197	9.3858e-07
90	K	H	0	5327197	0
90	K	I	0	5327197	0
90	K	K	5208084	5327197	0.977641
90	K	L	1	5327197	1.87716e-07
90	K	M	1	5327197	1.87716e-07
90	K	N	287	5327197	5.38745e-05
90	K	P	1	5327197	1.87716e-07
90	K	Q	0	5327197	0
90	K	R	118812	5327197	0.0223029
90	K	S	2	5327197	3.75432e-07
90	K	T	2	5327197	3.75432e-07
90	K	V	2	5327197	3.75432e-07
90	K	W	0	5327197	0
90	K	Y	0	5327197	0
91	V	-	0	5329942	0
91	V	A	33	5329942	6.19144e-06
91	V	C	1	5329942	1.87619e-07
91	V	D	0	5329942	0
91	V	E	0	5329942	0
91	V	F	4	5329942	7.50477e-07
91	V	G	1	5329942	1.87619e-07
91	V	H	0	5329942	0
91	V	I	157	5329942	2.94562e-05
91	V	K	0	5329942	0
91	V	L	5	5329942	9.38097e-07
91	V	M	0	5329942	0
91	V	N	0	5329942	0
91	V	P	1	5329942	1.87619e-07
91	V	Q	0	5329942	0
91	V	R	0	5329942	0
91	V	S	0	5329942	0
91	V	T	0	5329942	0
91	V	V	5329738	5329942	0.999962
91	V	W	0	5329942	0
91	V	Y	2	5329942	3.75239e-07
92	D	-	0	5329904	0
92	D	A	39	5329904	7.3172e-06
92	D	C	1	5329904	1.87621e-07
92	D	D	5328898	5329904	0.999811
92	D	E	52	5329904	9.75627e-06
92	D	F	0	5329904	0
92	D	G	694	5329904	0.000130209
92	D	H	0	5329904	0
92	D	I	1	5329904	1.87621e-07
92	D	K	0	5329904	0
92	D	L	2	5329904	3.75241e-07
92	D	M	0	5329904	0
92	D	N	164	5329904	3.07698e-05
92	D	P	0	5329904	0
92	D	Q	0	5329904	0
92	D	R	1	5329904	1.87621e-07
92	D	S	0	5329904	0
92	D	T	0	5329904	0
92	D	V	4	5329904	7.50483e-07
92	D	W	0	5329904	0
92	D	Y	48	5329904	9.00579e-06
93	T	-	0	5329826	0
93	T	A	104	5329826	1.95128e-05
93	T	C	0	5329826	0
93	T	D	0	5329826	0
93	T	E	10	5329826	1.87623e-06
93	T	F	0	5329826	0
93	T	G	0	5329826	0
93	T	H	0	5329826	0
93	T	I	2811	5329826	0.000527409
93	T	K	1	5329826	1.87623e-07
93	T	L	3	5329826	5.6287e-07
93	T	M	0	5329826	0
93	T	N	1	5329826	1.87623e-07
93	T	P	2	5329826	3.75247e-07
93	T	Q	1	5329826	1.87623e-07
93	T	R	0	5329826	0
93	T	S	11	5329826	2.06386e-06
93	T	T	5326879	5329826	0.999447
93	T	V	2	5329826	3.75247e-07
93	T	W	0	5329826	0
93	T	Y	1	5329826	1.87623e-07
94	A	-	0	5329847	0
94	A	A	5327690	5329847	0.999595
94	A	C	0	5329847	0
94	A	D	0	5329847	0
94	A	E	0	5329847	0
94	A	F	0	5329847	0
94	A	G	1	5329847	1.87623e-07
94	A	H	1	5329847	1.87623e-07
94	A	I	1	5329847	1.87623e-07
94	A	K	0	5329847	0
94	A	L	2	5329847	3.75245e-07
94	A	M	0	5329847	0
94	A	N	0	5329847	0
94	A	P	8	5329847	1.50098e-06
94	A	Q	0	5329847	0
94	A	R	0	5329847	0
94	A	S	59	5329847	1.10697e-05
94	A	T	415	5329847	7.78634e-05
94	A	V	1670	5329847	0.00031333
94	A	W	0	5329847	0
94	A	Y	0	5329847	0
95	N	-	0	5329916	0
95	N	A	0	5329916	0
95	N	C	0	5329916	0
95	N	D	0	5329916	0
95	N	E	0	5329916	0
95	N	F	0	5329916	0
95	N	G	0	5329916	0
95	N	H	2	5329916	3.7524e-07
95	N	I	3	5329916	5.62861e-07
95	N	K	0	5329916	0
95	N	L	0	5329916	0
95	N	M	0	5329916	0
95	N	N	5329895	5329916	0.999996
95	N	P	0	5329916	0
95	N	Q	2	5329916	3.7524e-07
95	N	R	2	5329916	3.7524e-07
95	N	S	12	5329916	2.25144e-06
95	N	T	0	5329916	0
95	N	V	0	5329916	0
95	N	W	0	5329916	0
95	N	Y	0	5329916	0
96	P	-	0	5329745	0
96	P	A	1	5329745	1.87626e-07
96	P	C	0	5329745	0
96	P	D	0	5329745	0
[truncated: 4,427 more rows]
