# Supplementary material for: Comprehensive fitness landscape of SARS-CoV-2 Mpro reveals insights into viral resistance mechanisms
Source: eLife. 2022 Jun 20;11:e77433. doi: 10.7554/eLife.77433 (PMC9323007; doi:10.7554/eLife.77433)
Supplement: Supplementary file 1. [file elife-77433-supp1.xlsx]

## Sheet: Sheet1
Supplementary file 1. Sequences of oligonucleotides used in this study
Oligonucleotide Name	Oligonucleotide Sequence
Oligos for barcode labeling
N18 barcode cassette oligo 1	phosphate-GGCCGCGAGTCCTGCCNNNNNNNNNNNNNNNNNNAGATCGGAAGAGCGTCGTGG
N18 barcode cassette oligo 2	phosphate-CGCGCCACGACGCTCTTCCGATCTNNNNNNNNNNNNNNNNNNGGCAGGACTCGC
Oligos for single-end sequencing of barcodes
identifier 1 primer	CAAGCAGAAGACGGCATACGAGATCGTGATGTGACTGGAGTTCAGACGTGTGCTCTTCCGATCcacacaggaaacagctatgac
identifier 2 primer	CAAGCAGAAGACGGCATACGAGATACATCGGTGACTGGAGTTCAGACGTGTGCTCTTCCGATCcacacaggaaacagctatgac
identifier 3 primer	CAAGCAGAAGACGGCATACGAGATGCCTAAGTGACTGGAGTTCAGACGTGTGCTCTTCCGATCcacacaggaaacagctatgac
identifier 4 primer	CAAGCAGAAGACGGCATACGAGATTGGTCAGTGACTGGAGTTCAGACGTGTGCTCTTCCGATCcacacaggaaacagctatgac
identifier 5 primer	CAAGCAGAAGACGGCATACGAGATCACTGTGTGACTGGAGTTCAGACGTGTGCTCTTCCGATCcacacaggaaacagctatgac
identifier 6 primer	CAAGCAGAAGACGGCATACGAGATATTGGCGTGACTGGAGTTCAGACGTGTGCTCTTCCGATCcacacaggaaacagctatgac
identifier 7 primer	CAAGCAGAAGACGGCATACGAGATGATCTGGTGACTGGAGTTCAGACGTGTGCTCTTCCGATCcacacaggaaacagctatgac
identifier 8 primer	CAAGCAGAAGACGGCATACGAGATTCAAGTGTGACTGGAGTTCAGACGTGTGCTCTTCCGATCcacacaggaaacagctatgac
identifier 9 primer	CAAGCAGAAGACGGCATACGAGATCTGATCGTGACTGGAGTTCAGACGTGTGCTCTTCCGATCcacacaggaaacagctatgac
identifier 10 primer	CAAGCAGAAGACGGCATACGAGATAAGCTAGTGACTGGAGTTCAGACGTGTGCTCTTCCGATCcacacaggaaacagctatgac
identifier 11 primer	CAAGCAGAAGACGGCATACGAGATGTAGCCGTGACTGGAGTTCAGACGTGTGCTCTTCCGATCcacacaggaaacagctatgac
identifier 12 primer	CAAGCAGAAGACGGCATACGAGATTACAAGGTGACTGGAGTTCAGACGTGTGCTCTTCCGATCcacacaggaaacagctatgac
identifier 13 primer	CAAGCAGAAGACGGCATACGAGATTGTTGAGTGACTGGAGTTCAGACGTGTGCTCTTCCGATCcacacaggaaacagctatgac
Oligos for generation of individual mutants
C145A_F	CTTCCTTAATGGCAGCGCAGGTTCGGTGG
C145A_R	CCACCGAACCTGCGCTGCCATTAAGGAAG
Oligos to construct p416LexA_UbMpro(WT)_B112
Ub_F	TCGGGACTAGTATGCAGATTTTCGTCAAGACT
Ub_R	CGAAACCCCGAACCACCTCTTAGCCTTAGCAC
Mpro_F	TAAGAGGTGGTTCGGGGTTTCGCAAAATGGCG
Mpro_R	GGAGTCGGATCCTTACTGAAACGTGACACCGCTACA
LexA_SacI_F	TTTCGAGCTCCCTAGGTG
LexA_SpeI_R	GGATCCACTAGTATAGAAGTATAG
LexA_B112_KpnI_F	GCATTGGTACCCTGCCACAGCAATTAATGC
LexA_B112_KpnI_R	CGTATGGTACCTGTAAACTGCGAACCTTGC
Oligos for Gibson Assembly of Mpro library
Mpro_Gib_F	CATCTTGTGCTAAGGCTAAG
Mpro_Gib_R	TTGATATCGAATTCCTGCAG
Oligos to construct DBD_MproCS_AD
DBD_EcoRI_F	GCCTAGAATTCATGAAGCTACTGTCTTCTATC
AD_SacI_R	CAGTGGAGCTCGTATCTACGATTCATTTTACTC
DBD_MproCS_R	AAAACCACTCTGCAGAACTGCACTAGTACCTCCCGATACAGTCAACTGTCTTTG
AD_MproCS_F	GCAGTTCTGCAGAGTGGTTTTAGGAAAGGTGGTGCCAATTTTAATCAAAGTGG
Oligos to construct CyPet_MproCS_Ypet
CyPet_BamHI_F	GCATTGGATCCAATTCGGGACTAGTATGTC
Ypet_XhoI_R	GCATTCTCGAGTTGATCCTTATTTGTACAATTCA
YPet_MproCS_F	GCAGTTCTGCAGAGTGGTTTTAGGAAAGGTGGTATGTCTAAAGGTGAAGAATTATTC
CyPet_MproCS_R	AAAACCACTCTGCAGAACTGCACTAGTACCTCCTTTGTACAATTCATCCATACC
Oligos for integration of reporter constructs
Ade2_F	GATGGAAGAGGTAACTTCG
Ade2_R	GTATGCCAAAGTCCTCG
