# Supplementary figures and images for: Comprehensive fitness landscape of SARS-CoV-2 Mpro reveals insights into viral resistance mechanisms
Source: eLife journal article supplement (doi:10.7554/elife.77433), 2022-06-20

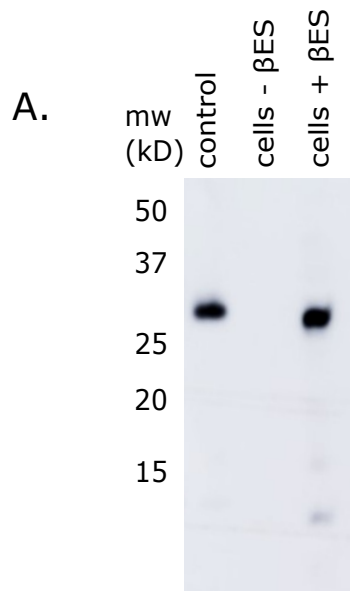

**B.**

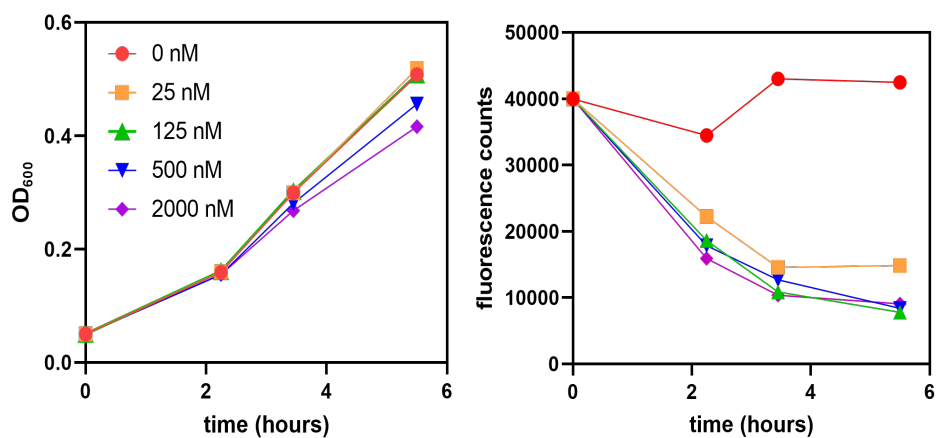

**C.**

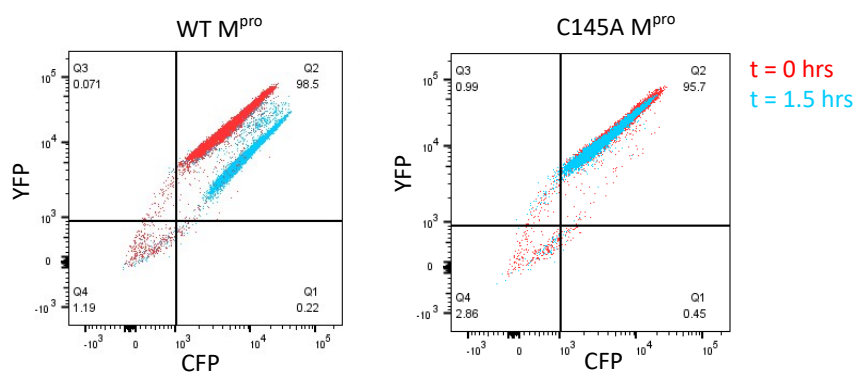

**D.**

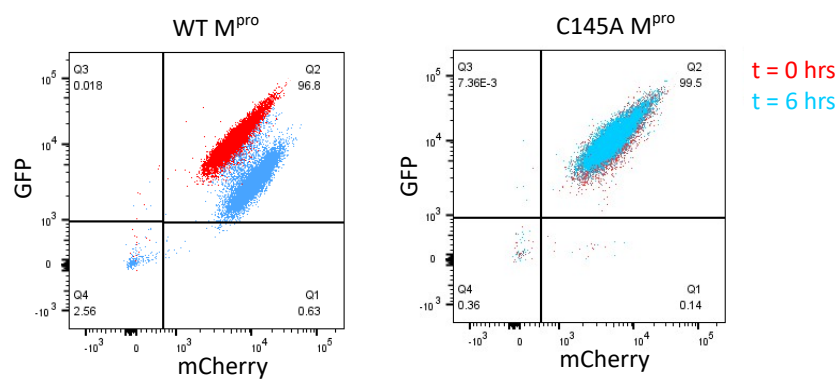

**E.**

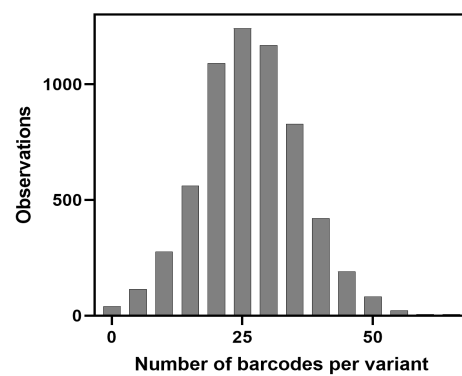

**F.**

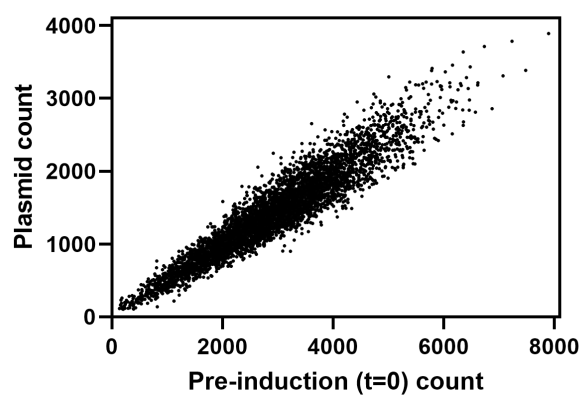

**G.**

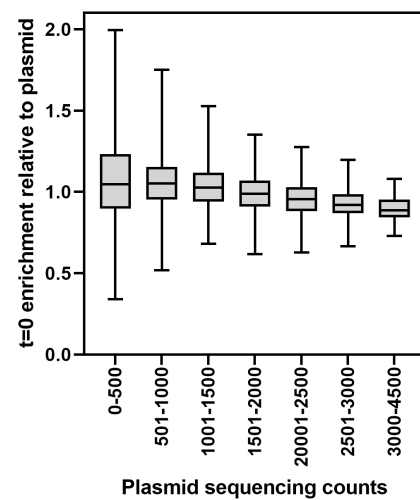

Supplement: supp [file elife_poa_e77433_Figure_1_figure_supplement_1.pdf › elife_poa_e77433_Figure_1_figure_supplement_1.pdf]

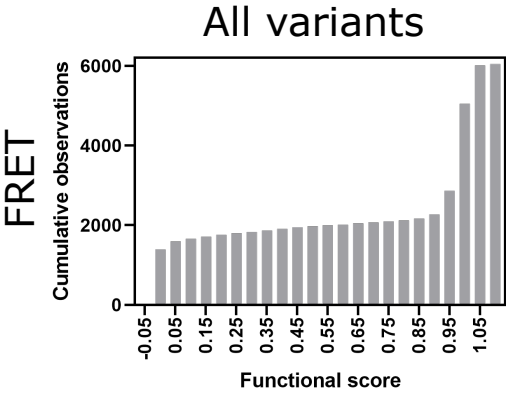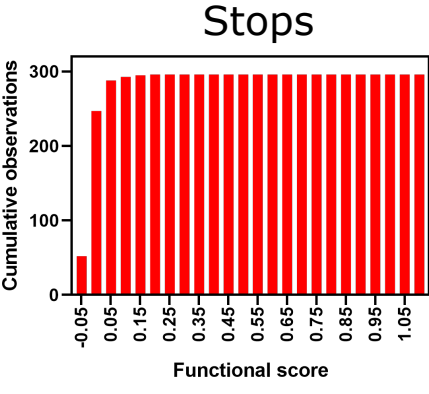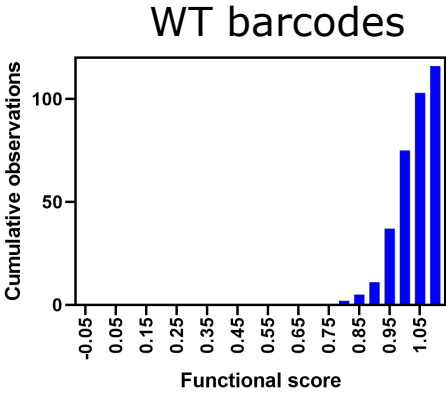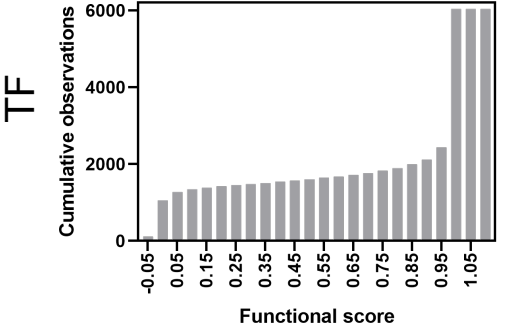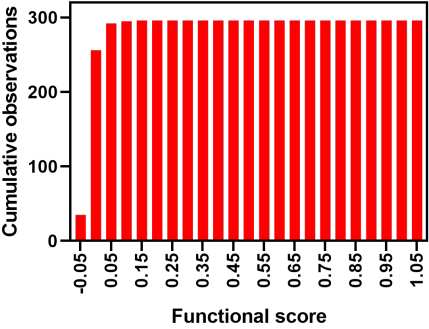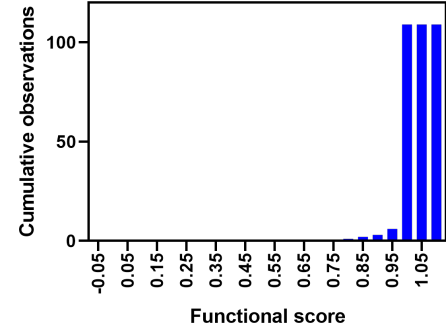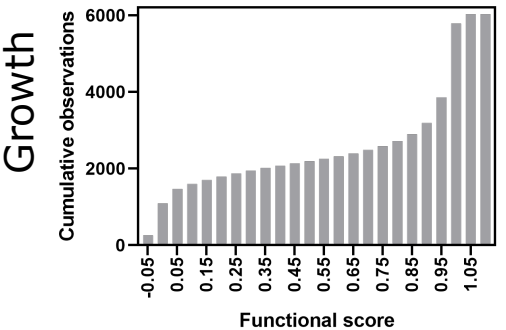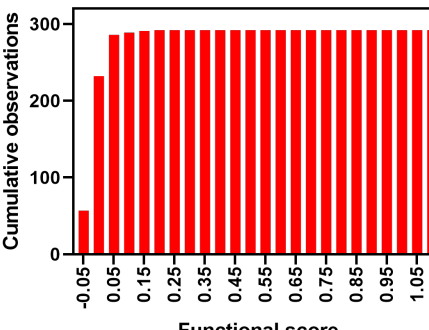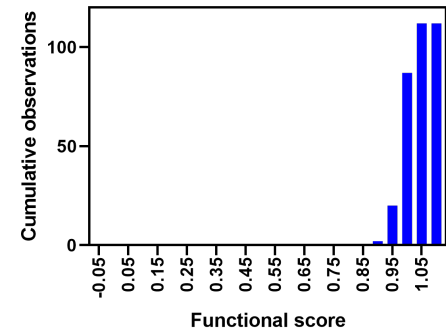

Supplement: supp [file elife_poa_e77433_Figure_2_figure_supplement_1.pdf › elife_poa_e77433_Figure_2_figure_supplement_1.pdf]

TF

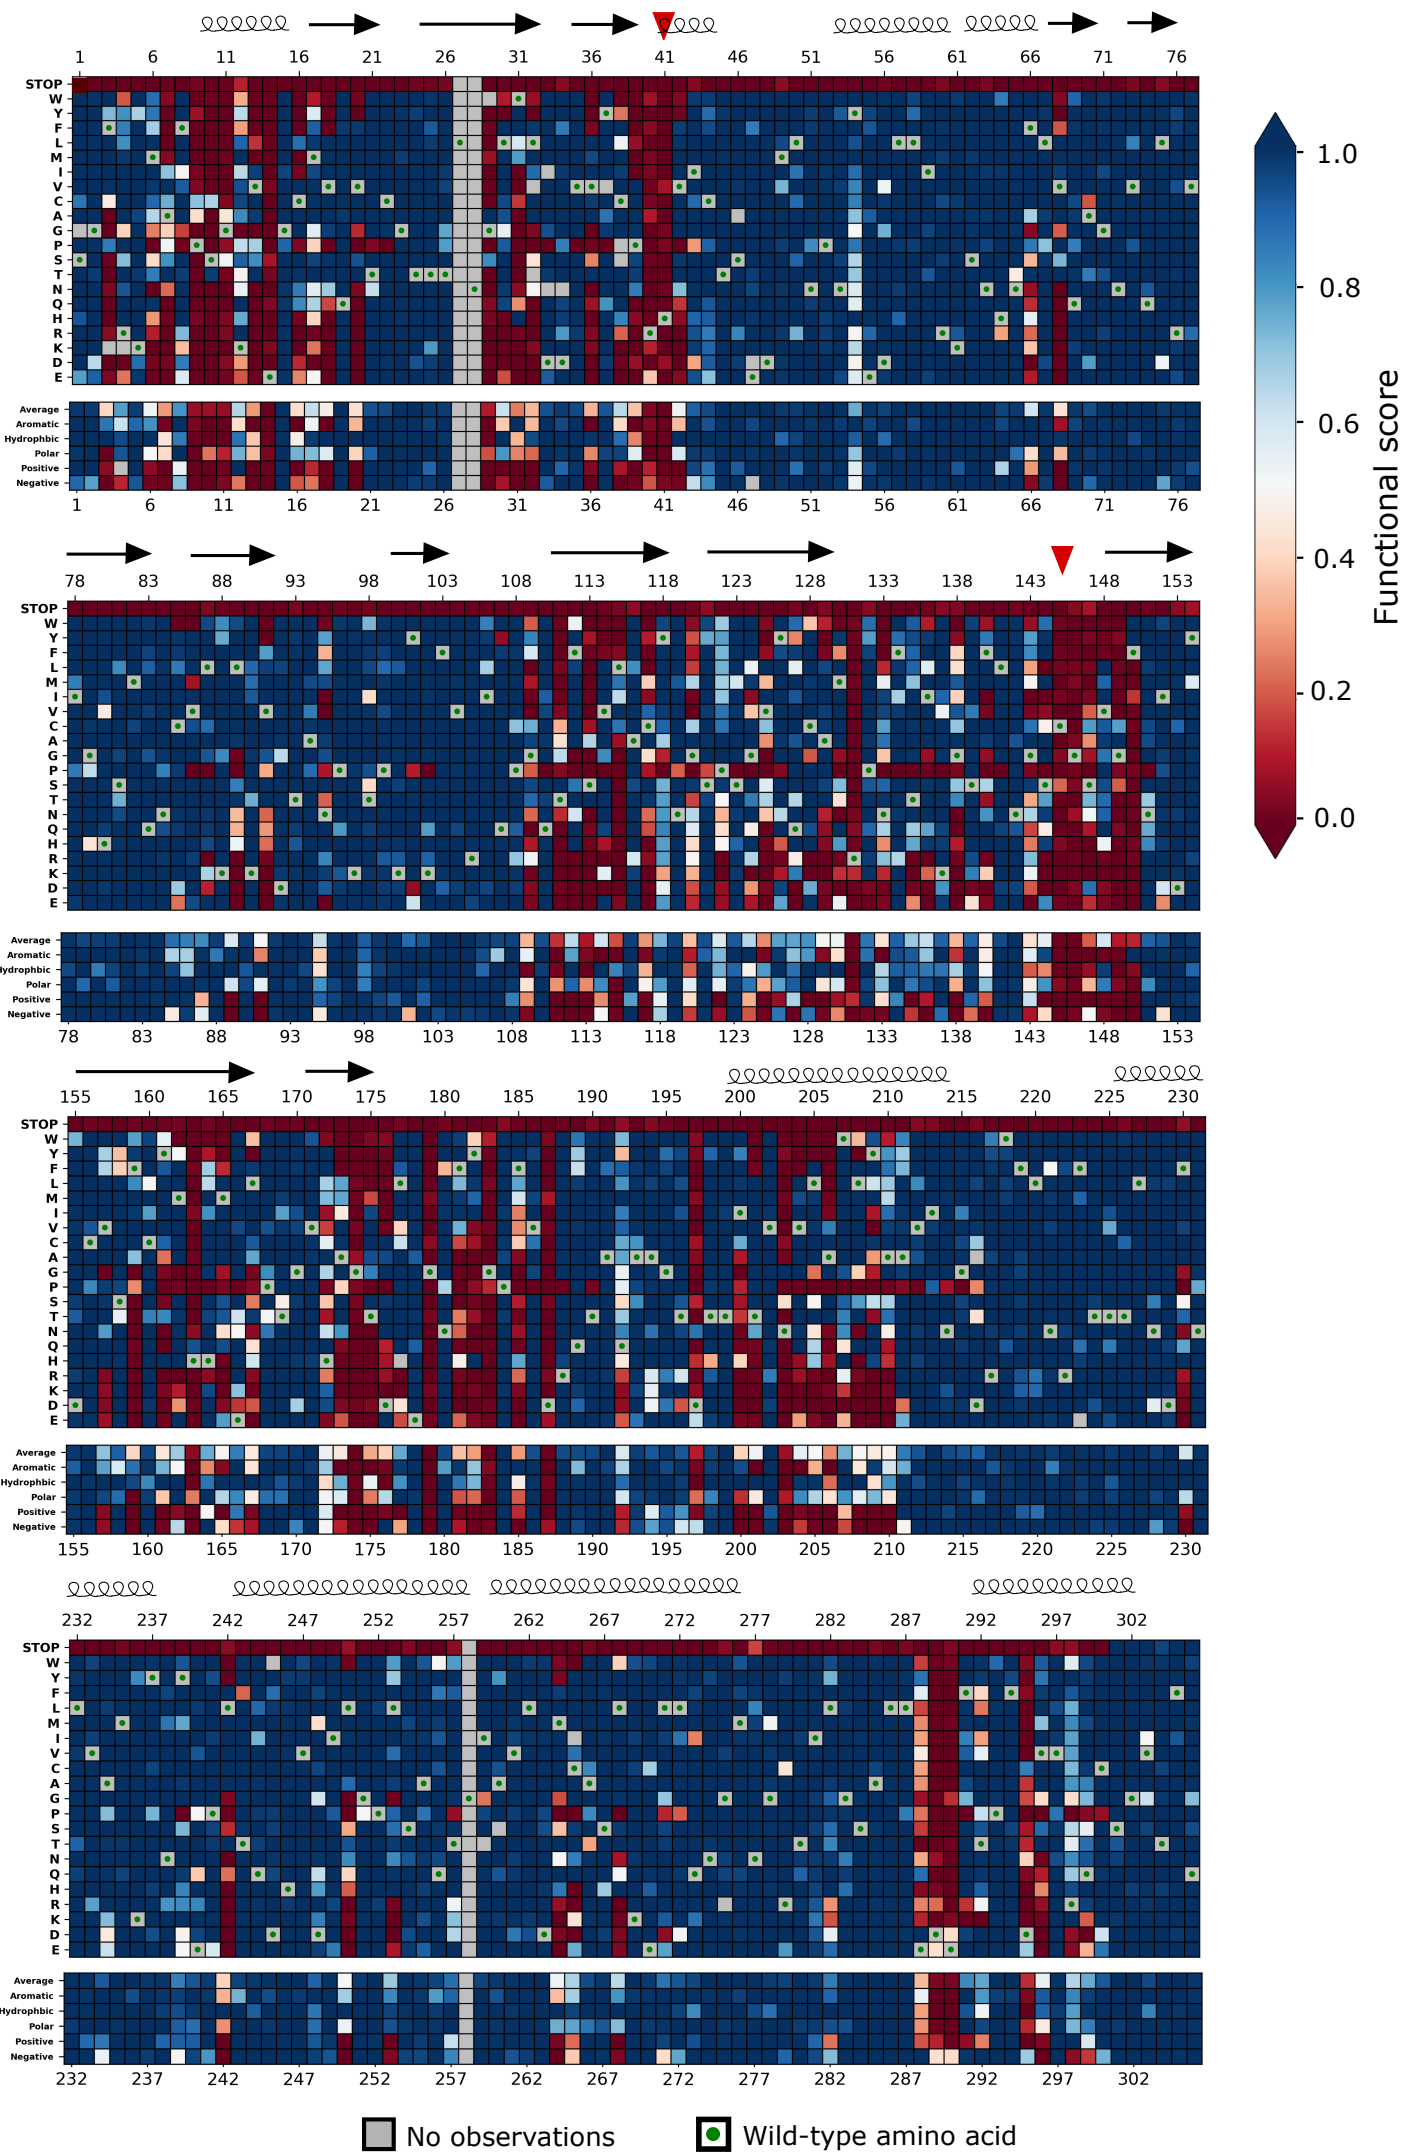

Supplement: supp [file elife_poa_e77433_Figure_3_figure_supplement_1.pdf › elife_poa_e77433_Figure_3_figure_supplement_1.pdf]

## Growth

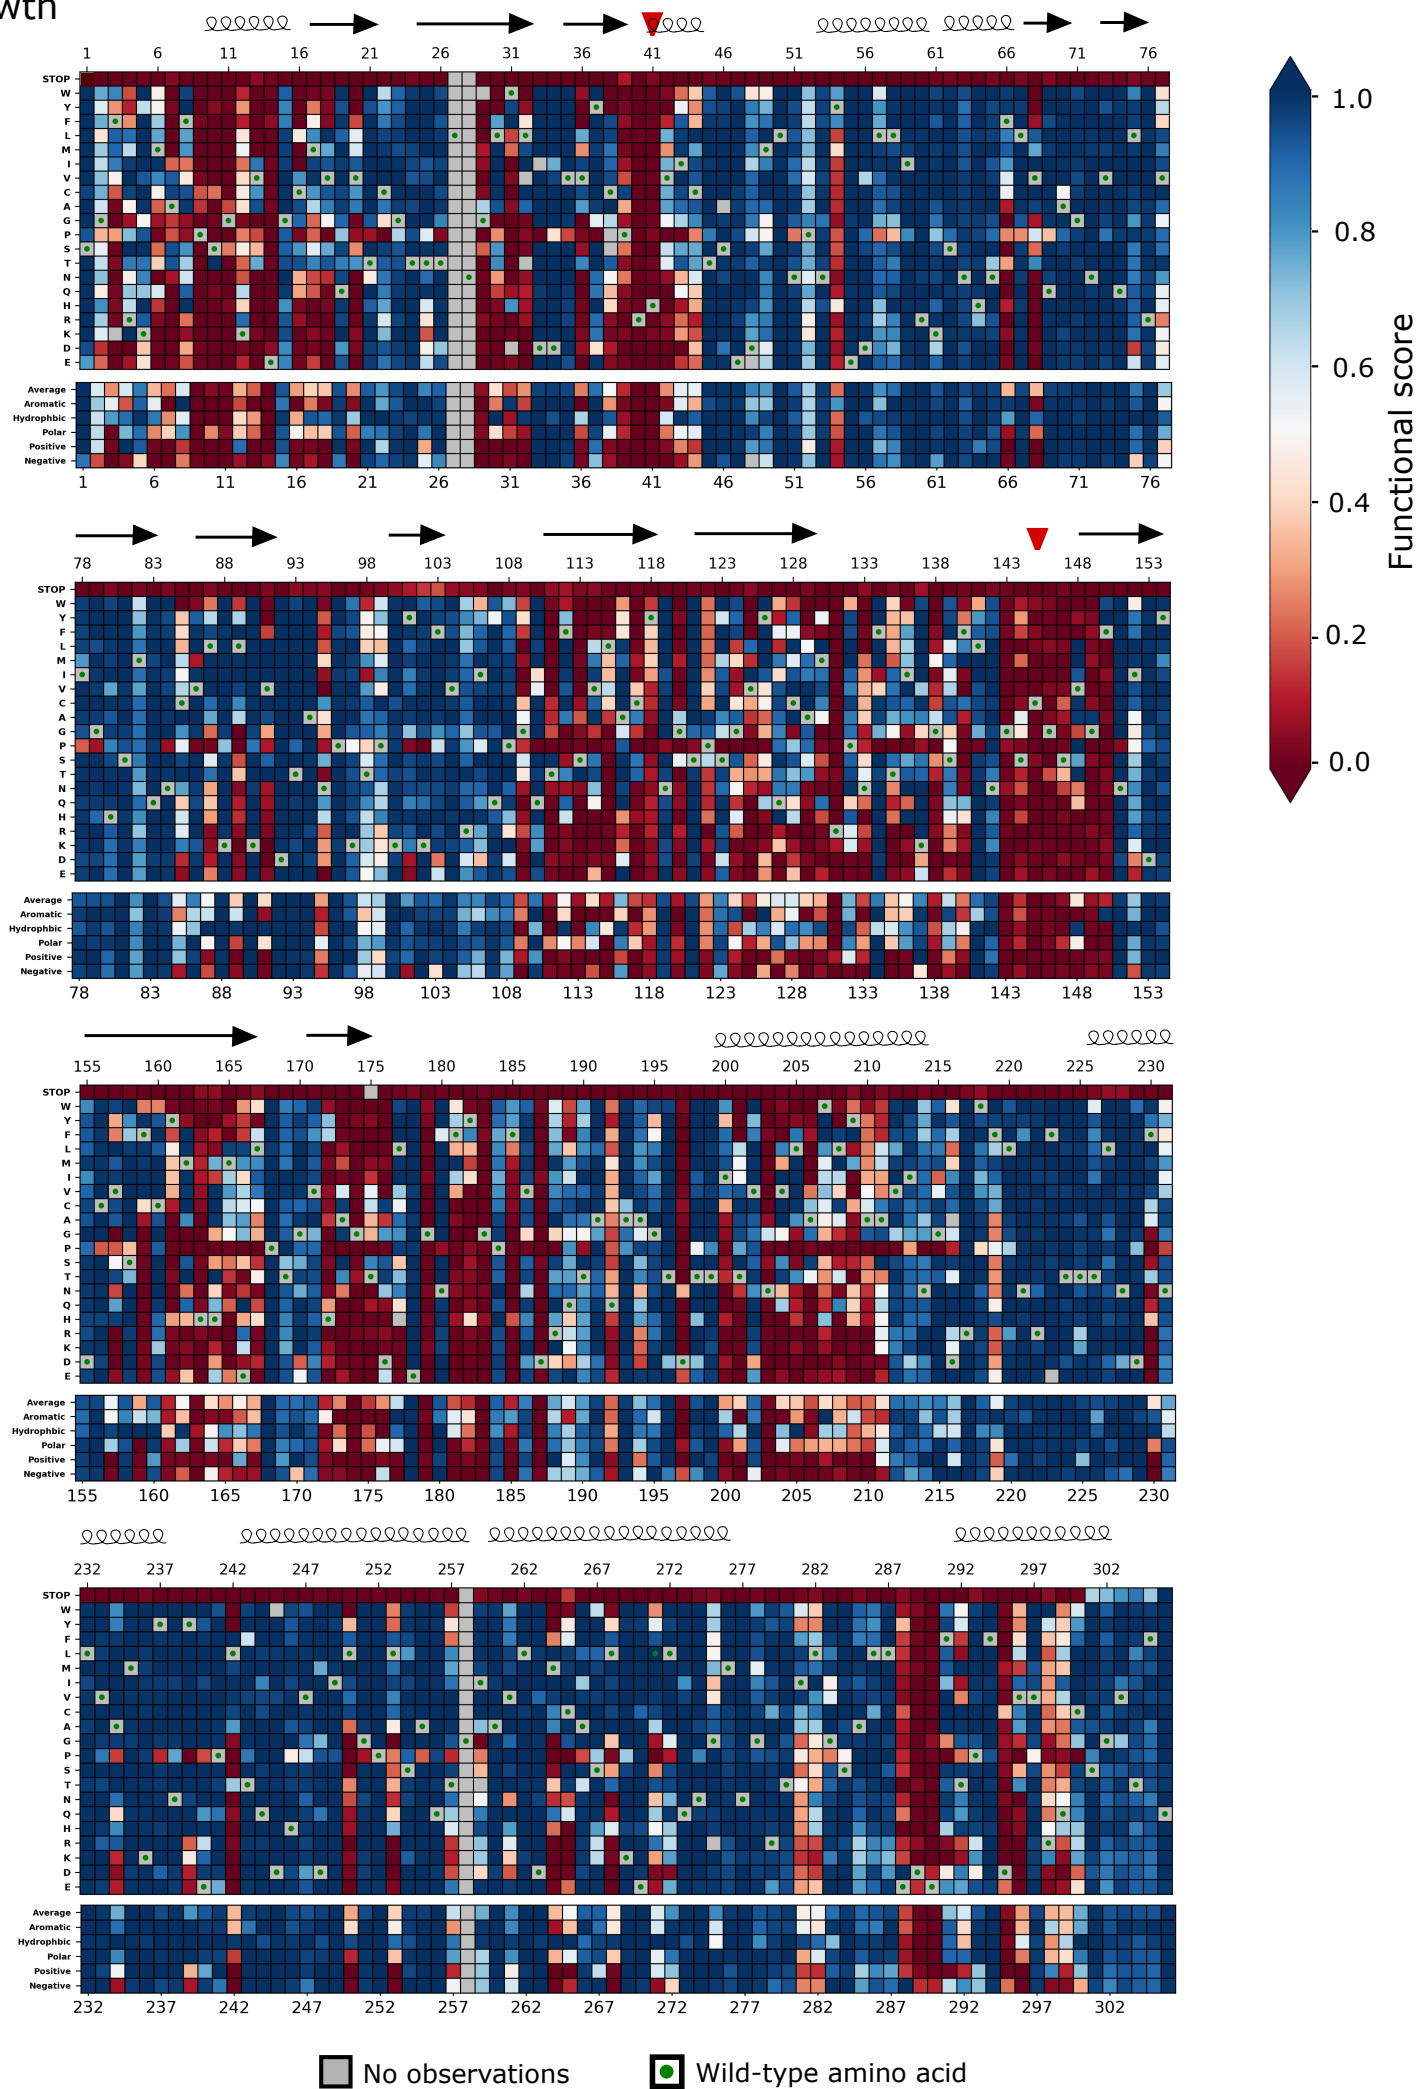

Supplement: supp [file elife_poa_e77433_Figure_3_figure_supplement_2.pdf › elife_poa_e77433_Figure_3_figure_supplement_2.pdf]

A.

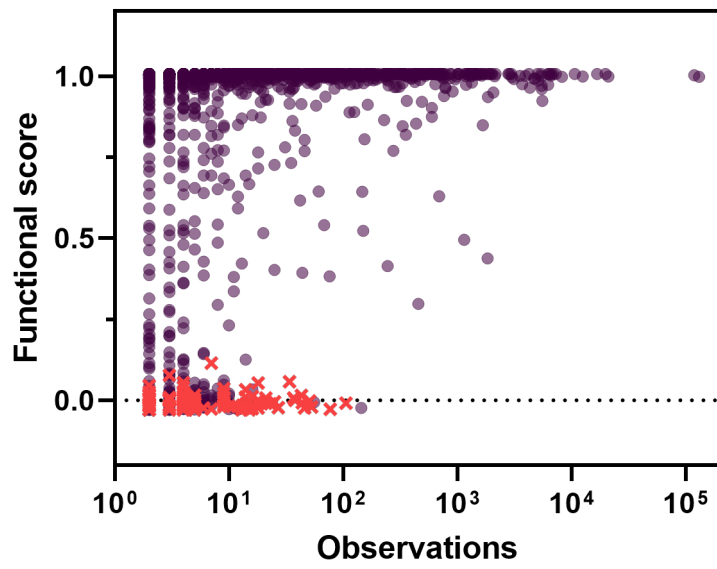

B.

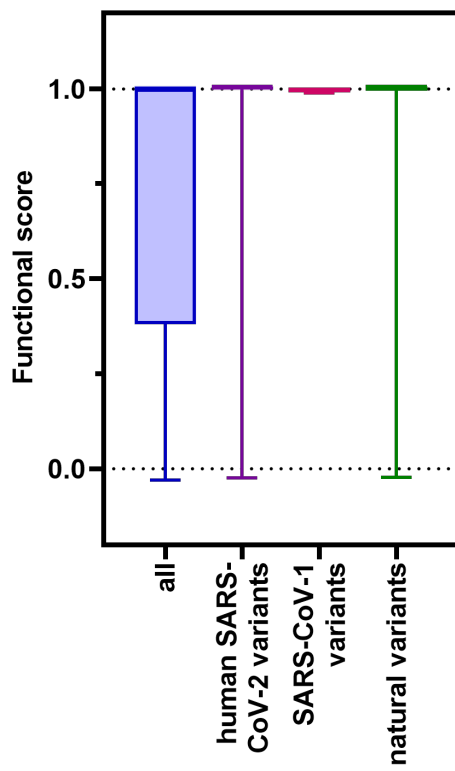

Supplement: supp [file elife_poa_e77433_Figure_5_figure_supplement_1.pdf › elife_poa_e77433_Figure_5_figure_supplement_1.pdf]

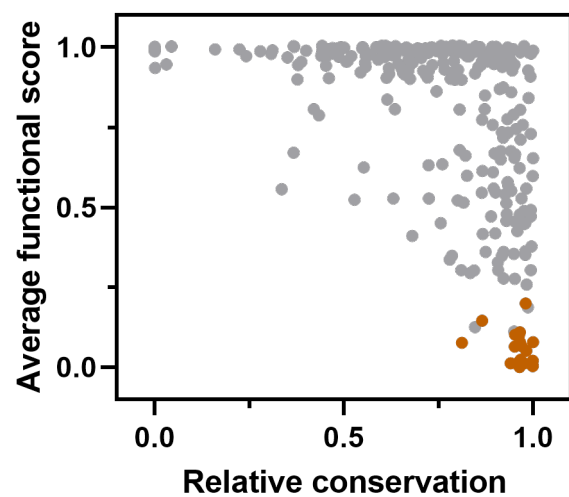

Supplement: supp [file elife_poa_e77433_Figure_6_figure_supplement_1.pdf › elife_poa_e77433_Figure_6_figure_supplement_1.pdf]

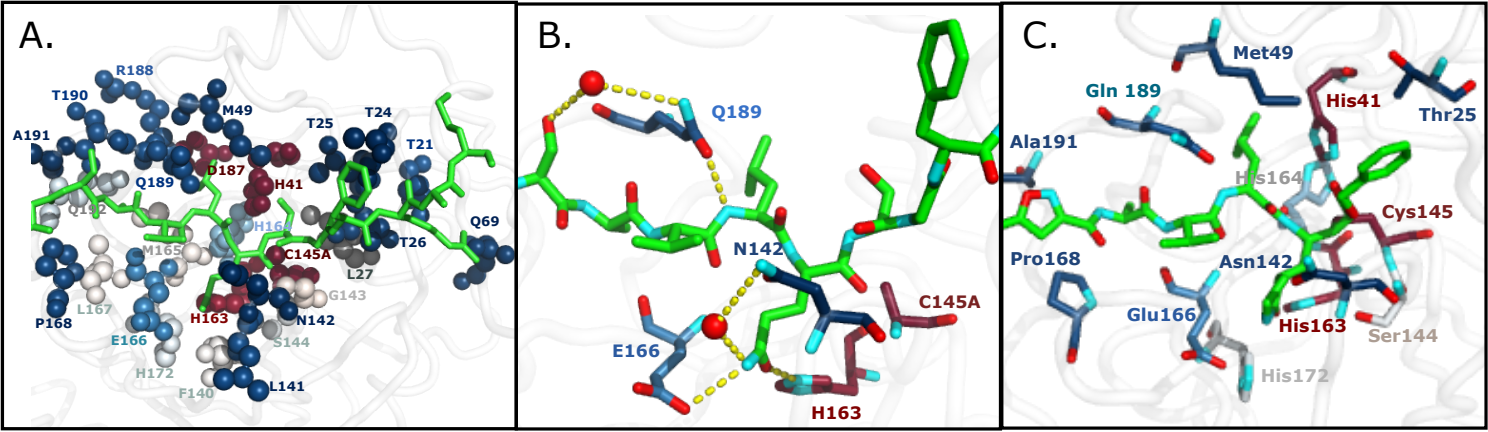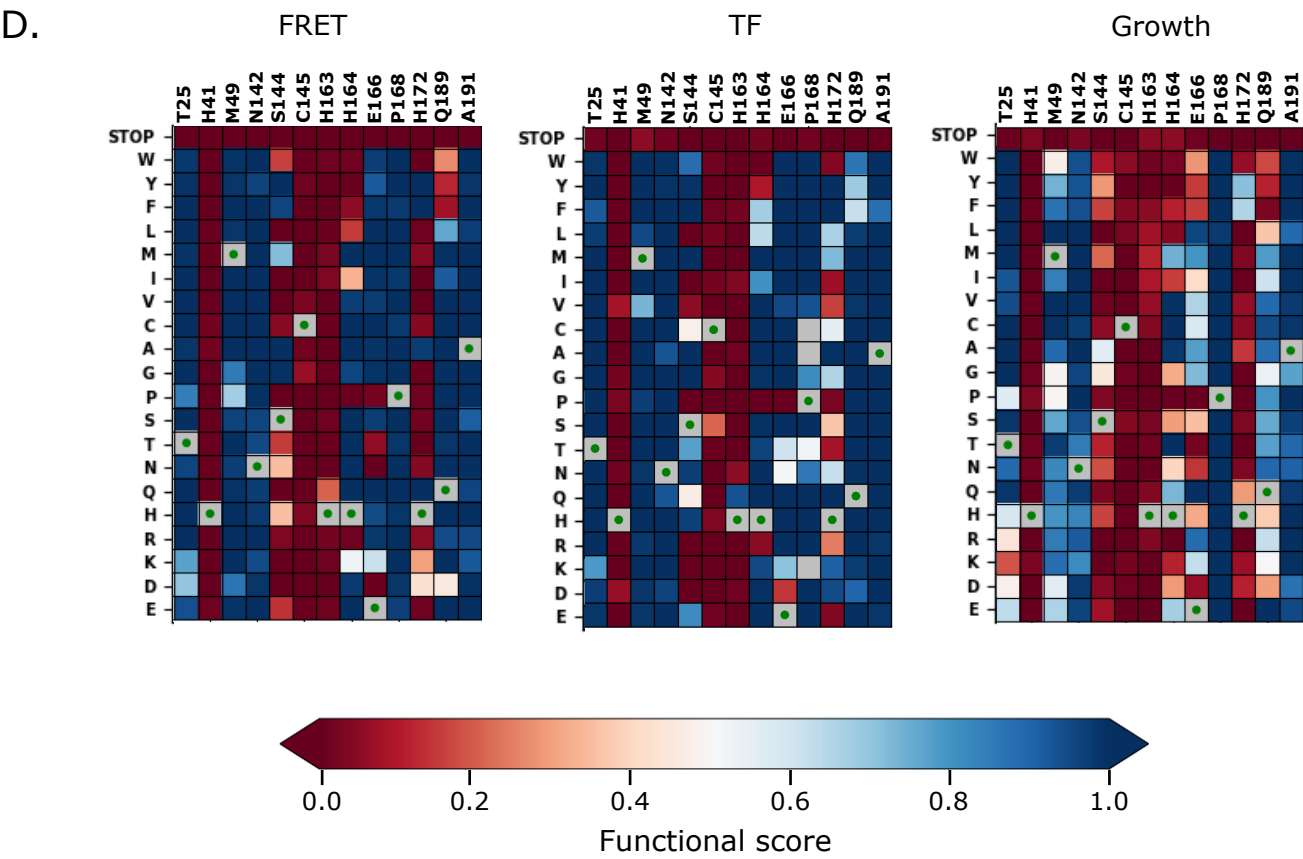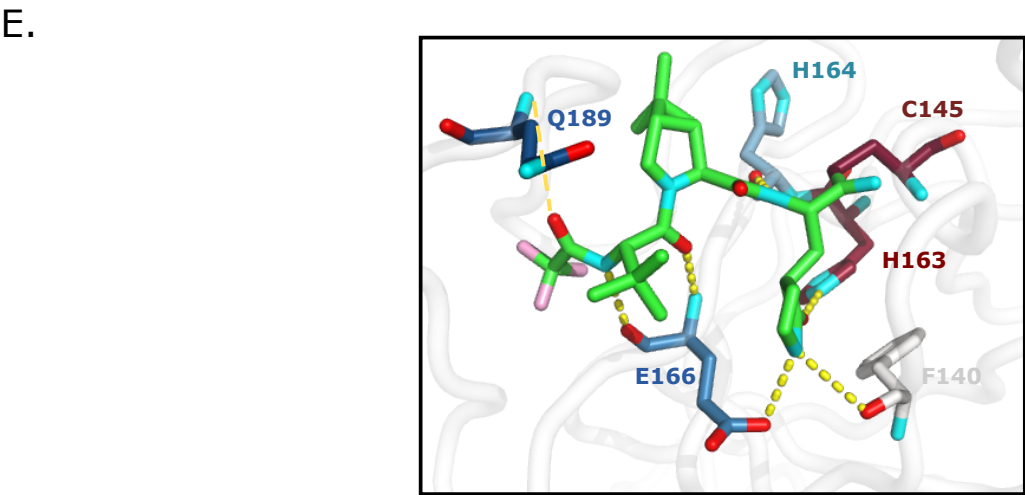

Supplement: supp [file elife_poa_e77433_Figure_7_figure_supplement_1.pdf › elife_poa_e77433_Figure_7_figure_supplement_1.pdf]
